# Supplementary material for: Active presynaptic ribosomes in the mammalian brain, and altered transmitter release after protein synthesis inhibition
Source: eLife. 2018 Oct 30;7:e36697. doi: 10.7554/eLife.36697 (PMC6231766; doi:10.7554/eLife.36697)
Supplement: Figure 2—source data 1. [file elife-36697-fig2-data1.xlsx]

## Sheet: Fig 2B
Content:	Pearson's measurements using imageJ
Raw Data:	This used the stacked series of images for the area shown in Figure 2A
Correction:	Background fluorescence value of 16 arbitrary fluorescence units was subtracted from each of the green channel images, uniform subtraction using the imageJ subtraction.
	This value was conservatively estimated based on measurements in the calyx field using a location that did not correspond to a presynaptic terminal or postsynaptic MNTB principle cell.
Pearsons adjusted (green -16)
	Pre	Post
Cell1	0.882	0.178
Cell2	0.867	0.283
Cell3	0.891	0.384
Cell4	0.912	0.311
Cell5	0.88	0.027
Cell6	0.779	0.022
Cell7	0.461	0.1
Cell8	0.531	0.018
Cell9	0.771	0.068
Cell10	0.403	0.051
Cell11	0.638	0.147
Cell12	0.685	0.084
Cell13	0.928	0.101
Average	0.740615	0.136462
SD	0.0502952	0.0331561
T.test	4.64506e-10

## Sheet: Fig 2D
Line Scan	Neuron1		Pearsons
			0.784743
Green		Red
X	Y	X	Y
0	0	0	0
0.189	1.968	0.189	0
0.378	0	0.378	0.9355
0.567	0.194	0.567	8.129
0.756	0.871	0.756	9.3548
0.945	3.516	0.945	12.6774
1.134	5.516	1.134	17.9355
1.323	4.387	1.323	25.3548
1.512	9.871	1.512	25.9677
1.7009	44	1.7009	34.6774
1.8899	55.742	1.8899	60.9355
2.0789	66.226	2.0789	46.129
2.2679	89.258	2.2679	56.3871
2.4569	89.871	2.4569	71.7419
2.6459	95.774	2.6459	49.5806
2.8349	98	2.8349	42.4839
3.0239	104	3.0239	55.4194
3.2129	87.645	3.2129	49.5484
3.4019	73.129	3.4019	53.129
3.5909	56.355	3.5909	65.871
3.7799	61.581	3.7799	45.9032
3.9689	77	3.9689	62.0645
4.1579	69.097	4.1579	40.2581
4.3469	73	4.3469	50.1936
4.5359	74.613	4.5359	30.129
4.7249	61.71	4.7249	29.9677
4.9138	32.806	4.9138	23.0968
5.1028	35.677	5.1028	52.8387
5.2918	44.419	5.2918	33.129
5.4808	50.484	5.4808	27.0968
5.6698	46.032	5.6698	42.5484
5.8588	73	5.8588	57
6.0478	60.645	6.0478	46.4839
6.2368	41.903	6.2368	37.8387
6.4258	34.226	6.4258	48.5484
6.6148	51.839	6.6148	42.3871
6.8038	79.29	6.8038	42.4194
6.9928	70.581	6.9928	49.6452
7.1818	52.806	7.1818	36.9677
7.3708	110.548	7.3708	38.5806
7.5598	109.355	7.5598	47.1936
7.7488	120.742	7.7488	25.2903
7.9378	90.677	7.9378	9
8.1267	62.097	8.1267	0
8.3157	22.645	8.3157	0
8.5047	0	8.5047	0
8.6937	0	8.6937	0
8.8827	0	8.8827	0
9.0717	0	9.0717	0
9.2607	0	9.2607	0
9.4497	0	9.4497	0
9.6387	0	9.6387	0
9.8277	0	9.8277	0
10.0167	0	10.0167	0
10.2057	0	10.2057	0
10.3947	0	10.3947	0
10.5837	0	10.5837	0
10.7727	0	10.7727	0
10.9617	0	10.9617	0
11.1507	0	11.1507	0
11.3396	0	11.3396	0
11.5286	0	11.5286	0
11.7176	0	11.7176	0

## Sheet: Fig 2E
Line Scan			Pearsons
Neuron2		Neuron2	0.93865
Green		Red
X	Y	X	Y
0	0	0	0
0.18899	0	0.18899	0
0.37799	0	0.37799	0
0.56698	0	0.56698	0
0.75598	0	0.75598	0
0.94497	0	0.94497	0
1.13396	0	1.13396	0
1.32296	0	1.32296	0
1.51195	0	1.51195	0
1.70095	0	1.70095	0
1.88994	0	1.88994	0
2.07894	0	2.07894	0
2.26793	0	2.26793	0
2.45692	0.444	2.45692	0
2.64592	14.026	2.64592	0
2.83491	41.667	2.83491	0
3.02391	72.034	3.02391	0
3.2129	107.803	3.2129	11.692
3.40189	148.291	3.40189	52.735
3.59089	198.436	3.59089	75.658
3.77988	215	3.77988	110.299
3.96888	215	3.96888	125.957
4.15787	212.846	4.15787	106.803
4.34687	203.436	4.34687	89.504
4.53586	201.846	4.53586	73.915
4.72485	209.504	4.72485	71.607
4.91385	208.667	4.91385	68.556
5.10284	212.085	5.10284	73.333
5.29184	184.641	5.29184	69.197
5.48083	178.932	5.48083	56.991
5.66982	171.085	5.66982	72.983
5.85882	160.744	5.85882	60.65
6.04781	159.88	6.04781	44.795
6.23681	145.889	6.23681	48.222
6.4258	134.991	6.4258	44.487
6.61479	114.103	6.61479	34.239
6.80379	93.915	6.80379	32.419
6.99278	56.94	6.99278	24.744
7.18178	18.906	7.18178	26.368
7.37077	2.444	7.37077	23.444
7.55977	0	7.55977	15.487
7.74876	0	7.74876	6.291
7.93775	0	7.93775	10.47
8.12675	0	8.12675	5.248
8.31574	0	8.31574	5.282
8.50474	0	8.50474	2.325
8.69373	0	8.69373	0
8.88272	0	8.88272	0.94
9.07172	0	9.07172	0.598
9.26071	0	9.26071	0
9.44971	0	9.44971	1.368
9.6387	0	9.6387	0.786
9.82769	0	9.82769	0

## Sheet: Fig 2G
Individual presynaptic intensities
File Name	Treatment	1	2	3	4	5	6	7	8	9	10	Average	St Dev	Std Error	Ttest
10min puro		35	39.475	81.17	54.232	74.446	78.97	88.037	69.648	63.465	59.581	64.4024	5.57154		9.52162e-10
1h pre aniso, 10min puro		0.196	0.105	0.089	0.114	0.102	0.152	0.089	0.144	0.235	0.171	0.1397	0.0155735
	jittered x	y
1	1.1615	35	sunset
1	0.934099	39.475	sunset
1	1.15372	81.17	sunset
1	0.753392	54.232	sunset
1	1.13013	74.446	sunset
1	1.10026	78.97	sunset
1	0.833076	88.037	sunset
1	0.775209	69.648	sunset
1	0.772058	63.465	sunset
1	1.24609	59.581	sunset
3	2.78742	0.196	aniso inhib
3	3.02263	0.105	aniso inhib
3	2.88997	0.089	aniso inhib
3	3.22645	0.114	aniso inhib
3	3.19913	0.102	aniso inhib
3	3.23843	0.152	aniso inhib
3	3.08012	0.089	aniso inhib
3	3.19205	0.144	aniso inhib
3	2.99259	0.235	aniso inhib
3	3.09107	0.171	aniso inhib
		AVG BARS
	0	64.402	sunset
	2	64.402	sunset
	2	0.1397	aniso inhib
	4	0.1397	aniso inhib
			sunset for 10m at 15% Red Laser														aniso pretreat, sunset for 10m at 15% RedLaser
			081717.lif - SUnSET		Z-stack3	2048x2048											081717.lif - SUnSET_perRXanisomycin				Z-stack3	2048x2048
