# Supplementary material for: Active presynaptic ribosomes in the mammalian brain, and altered transmitter release after protein synthesis inhibition
Source: eLife. 2018 Oct 30;7:e36697. doi: 10.7554/eLife.36697 (PMC6231766; doi:10.7554/eLife.36697)
Supplement: Figure 4—source data 1. [file elife-36697-fig4-data1.xlsx]

## Sheet: Fig 4B1
																										MINI3
									CONTROL	n=741		Bin count	n=741		ANISO	n=1057		Bin Count	n=1057							ANISO vs	Enter n	484
									MINI_3			484	741		MINI_3			486	1057							Control	Enter m	486
									interval	interval					interval	interval					Fitted exponentials		Fitted exponentials			DIFF	Enter diff	0.18729
									PreTetanus	seconds	Bin	Frequency	Cumultv		PreTetanus	seconds	Bin	Frequency	Cumultv			aniso		control		0.187287	8.17672e-08	P-Value
								0.001	5.6	0.0056	0.001	0	0		5.3	0.0053	0.001	0	0		0	-0.0185246	0	-0.0450407		0
								0.002	7.5	0.0075	0.002	0	0		5.5	0.0055	0.002	0	0		0.0081457	0.0296136	0.0116633	-0.00187573		0
								0.003	7.9	0.0079	0.003	0	0		6	0.006	0.003	0	0		0.0162914	0.0747898	0.0233266	0.0389866		0
								0.004	8.6	0.0086	0.004	0	0		6.9	0.0069	0.004	0	0		0.0244371	0.117209	0.0349899	0.0776957		0
								0.005	9.9	0.0099	0.005	0	0		7.1	0.0071	0.005	0	0		0.0325828	0.157062	0.0466532	0.11439		0
								0.006	9.9	0.0099	0.006	1	0.00134953		7.6	0.0076	0.006	3	0.00283822		0.0407285	0.194525	0.0583165	0.149199		0.00148869
								0.007	10.2	0.0102	0.007	0	0.00134953		8.1	0.0081	0.007	1	0.0037843		0.0488742	0.229762	0.0699798	0.182241		0.00243477
								0.008	11.2	0.0112	0.008	2	0.00404858		8.2	0.0082	0.008	2	0.00567644		0.0570199	0.262925	0.0816431	0.213627		0.00162786
								0.009	13.2	0.0132	0.009	1	0.00539811		8.5	0.0085	0.009	5	0.0104068		0.0651656	0.294156	0.0933064	0.24346		0.0050087
								0.01	13.5	0.0135	0.01	2	0.00809717		8.6	0.0086	0.01	1	0.0113529		0.0733113	0.323584	0.10497	0.271836		0.00325572
								0.011	13.8	0.0138	0.011	1	0.00944669		8.9	0.0089	0.011	0	0.0113529		0.081457	0.351331	0.116633	0.298844		0.00190619
								0.012	14.5	0.0145	0.012	1	0.0107962		9.6	0.0096	0.012	4	0.0151372		0.0896027	0.377511	0.128296	0.324567		0.00434096
								0.013	15	0.015	0.013	0	0.0107962		11.4	0.0114	0.013	4	0.0189215		0.0977484	0.402228	0.13996	0.34908		0.00812525
								0.014	15.1	0.0151	0.014	3	0.0148448		11.6	0.0116	0.014	11	0.0293283		0.105894	0.42558	0.151623	0.372457		0.0144835
								0.015	15.8	0.0158	0.015	2	0.0175439		11.7	0.0117	0.015	5	0.0340587		0.11404	0.447656	0.163286	0.394763		0.0165148
								0.016	15.9	0.0159	0.016	4	0.022942		11.9	0.0119	0.016	4	0.037843		0.122186	0.468541	0.174949	0.41606		0.014901
								0.017	16	0.016	0.017	0	0.022942		12.1	0.0121	0.017	6	0.0435194		0.130331	0.488312	0.186613	0.436407		0.0205774
								0.018	17.6	0.0176	0.018	2	0.025641		12.1	0.0121	0.018	4	0.0473037		0.138477	0.507042	0.198276	0.455857		0.0216627
								0.019	17.9	0.0179	0.019	3	0.0296896		12.7	0.0127	0.019	5	0.0520341		0.146623	0.524799	0.209939	0.47446		0.0223445
								0.02	18.1	0.0181	0.02	2	0.0323887		13	0.013	0.02	9	0.0605487		0.154768	0.541644	0.221603	0.492263		0.0281601
								0.021	18.5	0.0185	0.021	2	0.0350877		13.1	0.0131	0.021	4	0.064333		0.162914	0.557637	0.233266	0.509311		0.0292453
								0.022	18.6	0.0186	0.022	1	0.0364372		13.2	0.0132	0.022	9	0.0728477		0.17106	0.57283	0.244929	0.525643		0.0364104
								0.023	19.6	0.0196	0.023	1	0.0377868		13.3	0.0133	0.023	10	0.0823084		0.179205	0.587274	0.256593	0.541299		0.0445216
								0.024	19.6	0.0196	0.024	4	0.0431849		13.4	0.0134	0.024	4	0.0860927		0.187351	0.601017	0.268256	0.556313		0.0429078
								0.025	20.1	0.0201	0.025	0	0.0431849		13.5	0.0135	0.025	1	0.0870388		0.195497	0.614101	0.279919	0.57072		0.0438539
								0.026	20.8	0.0208	0.026	3	0.0472335		13.5	0.0135	0.026	11	0.0974456		0.203643	0.626567	0.291582	0.58455		0.0502121
								0.027	21.1	0.0211	0.027	3	0.0512821		13.6	0.0136	0.027	8	0.105014		0.211788	0.638453	0.303246	0.597833		0.0537321
								0.028	23	0.023	0.028	0	0.0512821		13.7	0.0137	0.028	6	0.110691		0.219934	0.649794	0.314909	0.610597		0.0594086
								0.029	23.1	0.0231	0.029	1	0.0526316		13.8	0.0138	0.029	2	0.112583		0.22808	0.660622	0.326572	0.622866		0.0599512
								0.03	23.3	0.0233	0.03	1	0.0539811		13.8	0.0138	0.03	6	0.118259		0.236225	0.670967	0.338236	0.634666		0.0642781
								0.031	23.3	0.0233	0.031	0	0.0539811		14	0.014	0.031	6	0.123936		0.244371	0.680859	0.349899	0.646018		0.0699546
								0.032	23.5	0.0235	0.032	3	0.0580297		14.6	0.0146	0.032	7	0.130558		0.252517	0.690324	0.361562	0.656945		0.0725285
								0.033	25.4	0.0254	0.033	1	0.0593792		14.7	0.0147	0.033	4	0.134342		0.260662	0.699386	0.373226	0.667466		0.0749633
								0.034	25.9	0.0259	0.034	4	0.0647773		14.8	0.0148	0.034	4	0.138127		0.268808	0.708068	0.384889	0.6776		0.0733494
								0.035	25.9	0.0259	0.035	3	0.0688259		14.9	0.0149	0.035	2	0.140019		0.276954	0.716391	0.396552	0.687365		0.071193
								0.036	26.8	0.0268	0.036	4	0.074224		15	0.015	0.036	8	0.147588		0.2851	0.724376	0.408215	0.696778		0.0733635
								0.037	26.9	0.0269	0.037	1	0.0755735		15.1	0.0151	0.037	7	0.15421		0.293245	0.732042	0.419879	0.705854		0.0786365
								0.038	27	0.027	0.038	1	0.0769231		15.4	0.0154	0.038	5	0.15894		0.301391	0.739405	0.431542	0.714608		0.0820173
								0.039	28.4	0.0284	0.039	2	0.0796221		15.6	0.0156	0.039	4	0.162725		0.309537	0.746482	0.443205	0.723054		0.0831026
								0.04	29.6	0.0296	0.04	2	0.0823212		15.9	0.0159	0.04	4	0.166509		0.317682	0.753289	0.454869	0.731206		0.0841878
								0.041	31.1	0.0311	0.041	5	0.0890688		16.1	0.0161	0.041	5	0.171239		0.325828	0.759839	0.466532	0.739076		0.0821705
								0.042	31.8	0.0318	0.042	0	0.0890688		16.2	0.0162	0.042	5	0.17597		0.333974	0.766146	0.478195	0.746676		0.0869009
								0.043	31.9	0.0319	0.043	3	0.0931174		16.2	0.0162	0.043	9	0.184484		0.342119	0.772222	0.489859	0.754016		0.091367
								0.044	32.1	0.0321	0.044	4	0.0985155		16.7	0.0167	0.044	3	0.187323		0.350265	0.778079	0.501522	0.761109		0.0888071
								0.045	33.5	0.0335	0.045	1	0.099865		17	0.017	0.045	2	0.189215		0.358411	0.783728	0.513185	0.767963		0.0893497
								0.046	33.5	0.0335	0.046	2	0.102564		17	0.017	0.046	3	0.192053		0.366556	0.789178	0.524848	0.774589		0.0894889
								0.047	33.7	0.0337	0.047	1	0.103914		17.1	0.0171	0.047	6	0.197729		0.374702	0.794441	0.536512	0.780994		0.0938158
								0.048	33.9	0.0339	0.048	2	0.106613		17.1	0.0171	0.048	9	0.206244		0.382848	0.799524	0.548175	0.787189		0.0996314
								0.049	34.5	0.0345	0.049	1	0.107962		17.7	0.0177	0.049	7	0.212867		0.390994	0.804437	0.559838	0.793181		0.104904
								0.05	34.7	0.0347	0.05	0	0.107962		17.9	0.0179	0.05	2	0.214759		0.399139	0.809186	0.571502	0.798978		0.106797
								0.051	34.8	0.0348	0.051	1	0.109312		18.2	0.0182	0.051	1	0.215705		0.407285	0.81378	0.583165	0.804587		0.106393
								0.052	35.2	0.0352	0.052	2	0.112011		18.4	0.0184	0.052	6	0.221381		0.415431	0.818226	0.594828	0.810016		0.10937
								0.053	35.3	0.0353	0.053	2	0.11471		18.6	0.0186	0.053	11	0.231788		0.423576	0.82253	0.606492	0.81527		0.117078
								0.054	35.4	0.0354	0.054	2	0.117409		18.7	0.0187	0.054	3	0.234626		0.431722	0.826698	0.618155	0.820357		0.117217
								0.055	35.7	0.0357	0.055	3	0.121457		19	0.019	0.055	4	0.238411		0.439868	0.830736	0.629818	0.825283		0.116953
								0.056	36.3	0.0363	0.056	4	0.126856		19.2	0.0192	0.056	3	0.241249		0.448013	0.834651	0.641482	0.830053		0.114393
								0.057	37.7	0.0377	0.057	5	0.133603		19.2	0.0192	0.057	4	0.245033		0.456159	0.838446	0.653145	0.834673		0.11143
								0.058	38.5	0.0385	0.058	1	0.134953		19.3	0.0193	0.058	5	0.249763		0.464305	0.842127	0.664808	0.839148		0.114811
								0.059	38.9	0.0389	0.059	2	0.137652		19.4	0.0194	0.059	4	0.253548		0.472451	0.845698	0.676471	0.843484		0.115896
								0.06	39.7	0.0397	0.06	2	0.140351		19.6	0.0196	0.06	6	0.259224		0.480596	0.849164	0.688135	0.847685		0.118873
								0.061	39.8	0.0398	0.061	3	0.144399		19.6	0.0196	0.061	4	0.263009		0.488742	0.85253	0.699798	0.851756		0.118609
								0.062	40.2	0.0402	0.062	1	0.145749		19.8	0.0198	0.062	6	0.268685		0.496888	0.855798	0.711461	0.855702		0.122936
								0.063	40.2	0.0402	0.063	3	0.149798		19.8	0.0198	0.063	1	0.269631		0.505033	0.858972	0.723125	0.859526		0.119833
								0.064	40.5	0.0405	0.064	2	0.152497		20	0.02	0.064	3	0.272469		0.513179	0.862057	0.734788	0.863233		0.119973
								0.065	40.5	0.0405	0.065	3	0.156545		20.5	0.0205	0.065	4	0.276254		0.521325	0.865056	0.746451	0.866827		0.119708
								0.066	40.6	0.0406	0.066	1	0.157895		20.5	0.0205	0.066	4	0.280038		0.52947	0.867971	0.758115	0.870311		0.122143
								0.067	42.2	0.0422	0.067	1	0.159244		20.6	0.0206	0.067	4	0.283822		0.537616	0.870805	0.769778	0.873689		0.124578
								0.068	42.6	0.0426	0.068	1	0.160594		20.7	0.0207	0.068	3	0.28666		0.545762	0.873562	0.781441	0.876965		0.126067
								0.069	42.9	0.0429	0.069	2	0.163293		21.1	0.0211	0.069	8	0.294229		0.553908	0.876245	0.793104	0.880142		0.130936
								0.07	43.3	0.0433	0.07	1	0.164642		21.2	0.0212	0.07	3	0.297067		0.562053	0.878855	0.804768	0.883224		0.132425
								0.071	43.3	0.0433	0.071	1	0.165992		21.2	0.0212	0.071	3	0.299905		0.570199	0.881395	0.816431	0.886212		0.133913
								0.072	43.5	0.0435	0.072	2	0.168691		21.3	0.0213	0.072	6	0.305582		0.578345	0.883868	0.828094	0.889111		0.136891
								0.073	43.8	0.0438	0.073	4	0.174089		21.7	0.0217	0.073	6	0.311258		0.58649	0.886275	0.839758	0.891923		0.137169
								0.074	44.7	0.0447	0.074	1	0.175439		21.7	0.0217	0.074	5	0.315989		0.594636	0.88862	0.851421	0.894651		0.14055
								0.075	45.5	0.0455	0.075	4	0.180837		21.9	0.0219	0.075	3	0.318827		0.602782	0.890903	0.863084	0.897298		0.13799
								0.076	45.7	0.0457	0.076	0	0.180837		21.9	0.0219	0.076	1	0.319773		0.610927	0.893127	0.874748	0.899866		0.138936
								0.077	46.7	0.0467	0.077	1	0.182186		22	0.022	0.077	2	0.321665		0.619073	0.895295	0.886411	0.902357		0.139479
								0.078	47.1	0.0471	0.078	0	0.182186		22.1	0.0221	0.078	2	0.323557		0.627219	0.897406	0.898074	0.904775		0.141371
								0.079	47.1	0.0471	0.079	4	0.187584		22.1	0.0221	0.079	5	0.328288		0.635365	0.899464	0.909737	0.907121		0.140703
								0.08	48.9	0.0489	0.08	2	0.190283		22.3	0.0223	0.08	8	0.335856		0.64351	0.90147	0.921401	0.909398		0.145573
								0.081	50.3	0.0503	0.081	2	0.192982		22.3	0.0223	0.081	0	0.335856		0.651656	0.903425	0.933064	0.911607		0.142874
								0.082	51.2	0.0512	0.082	5	0.19973		22.4	0.0224	0.082	3	0.338694		0.659802	0.905331	0.944727	0.913751		0.138964
								0.083	51.8	0.0518	0.083	2	0.202429		22.4	0.0224	0.083	2	0.340587		0.667947	0.90719	0.956391	0.915832		0.138157
								0.084	52.2	0.0522	0.084	2	0.205128		22.4	0.0224	0.084	5	0.345317		0.676093	0.909002	0.968054	0.917852		0.140189
								0.085	53	0.053	0.085	1	0.206478		22.6	0.0226	0.085	2	0.347209		0.684239	0.91077	0.979717	0.919813		0.140731
								0.086	53.5	0.0535	0.086	0	0.206478		22.6	0.0226	0.086	4	0.350993		0.692385	0.912494	0.991381	0.921715		0.144516
								0.087	53.8	0.0538	0.087	1	0.207827		22.9	0.0229	0.087	4	0.354778		0.70053	0.914175	1.00304	0.923563		0.14695
								0.088	54.6	0.0546	0.088	1	0.209177		23.1	0.0231	0.088	5	0.359508		0.708676	0.915815	1.01471	0.925356		0.150331
								0.089	54.9	0.0549	0.089	5	0.215924		23.6	0.0236	0.089	2	0.3614		0.716822	0.917416	1.02637	0.927096		0.145476
								0.09	55	0.055	0.09	0	0.215924		23.9	0.0239	0.09	5	0.366131		0.724967	0.918977	1.03803	0.928786		0.150206
								0.091	55.1	0.0551	0.091	0	0.215924		24	0.024	0.091	2	0.368023		0.733113	0.9205	1.0497	0.930426		0.152098
								0.092	55.2	0.0552	0.092	1	0.217274		24.9	0.0249	0.092	3	0.370861		0.741259	0.921987	1.06136	0.932018		0.153587
								0.093	55.4	0.0554	0.093	2	0.219973		25.1	0.0251	0.093	4	0.374645		0.749404	0.923438	1.07302	0.933564		0.154672
								0.094	56	0.056	0.094	0	0.219973		25.1	0.0251	0.094	2	0.376537		0.75755	0.924854	1.08469	0.935065		0.156564
								0.095	56.1	0.0561	0.095	4	0.225371		25.1	0.0251	0.095	4	0.380322		0.765696	0.926235	1.09635	0.936522		0.154951
								0.096	56.5	0.0565	0.096	3	0.22942		25.4	0.0254	0.096	6	0.385998		0.773842	0.927584	1.10801	0.937937		0.156578
								0.097	56.7	0.0567	0.097	1	0.230769		25.5	0.0255	0.097	4	0.389782		0.781987	0.928901	1.11968	0.939311		0.159013
								0.098	56.7	0.0567	0.098	1	0.232119		25.5	0.0255	0.098	5	0.394513		0.790133	0.930186	1.13134	0.940644		0.162394
								0.099	56.9	0.0569	0.099	0	0.232119		25.8	0.0258	0.099	1	0.395459		0.798279	0.93144	1.143	0.941939		0.16334
								0.1	57.6	0.0576	0.1	2	0.234818		25.8	0.0258	0.1	1	0.396405		0.806424	0.932665	1.15467	0.943197		0.161587
								0.101	58.1	0.0581	0.101	2	0.237517		25.8	0.0258	0.101	3	0.399243		0.81457	0.933861	1.16633	0.944417		0.161726
								0.102	58.9	0.0589	0.102	1	0.238866		25.9	0.0259	0.102	3	0.402081		0.822716	0.935029	1.17799	0.945603		0.163215
								0.103	59.2	0.0592	0.103	2	0.241565		26	0.026	0.103	4	0.405866		0.830861	0.936169	1.18966	0.946754		0.1643
								0.104	59.4	0.0594	0.104	1	0.242915		26.1	0.0261	0.104	4	0.40965		0.839007	0.937282	1.20132	0.947872		0.166735
								0.105	60.1	0.0601	0.105	0	0.242915		26.3	0.0263	0.105	5	0.41438		0.847153	0.938369	1.21298	0.948957		0.171465
								0.106	60.2	0.0602	0.106	2	0.245614		26.4	0.0264	0.106	2	0.416272		0.855299	0.93943	1.22465	0.950011		0.170658
								0.107	61	0.061	0.107	2	0.248313		26.4	0.0264	0.107	2	0.418165		0.863444	0.940466	1.23631	0.951034		0.169852
								0.108	61.6	0.0616	0.108	0	0.248313		26.7	0.0267	0.108	3	0.421003		0.87159	0.941479	1.24797	0.952028		0.17269
								0.109	62.2	0.0622	0.109	1	0.249663		26.7	0.0267	0.109	3	0.423841		0.879736	0.942467	1.25964	0.952993		0.174178
								0.11	62.4	0.0624	0.11	1	0.251012		26.8	0.0268	0.11	3	0.426679		0.887881	0.943432	1.2713	0.95393		0.175667
								0.111	62.7	0.0627	0.111	3	0.255061		27	0.027	0.111	3	0.429518		0.896027	0.944375	1.28296	0.95484		0.174457
								0.112	63.2	0.0632	0.112	2	0.25776		27.1	0.0271	0.112	1	0.430464		0.904173	0.945296	1.29463	0.955724		0.172704
								0.113	64	0.064	0.113	3	0.261808		27.1	0.0271	0.113	1	0.43141		0.912318	0.946195	1.30629	0.956582		0.169601
								0.114	64.1	0.0641	0.114	1	0.263158		27.4	0.0274	0.114	4	0.435194		0.920464	0.947074	1.31795	0.957416		0.172036
								0.115	64.3	0.0643	0.115	0	0.263158		27.4	0.0274	0.115	4	0.438978		0.92861	0.947932	1.32962	0.958225		0.17582
								0.116	65	0.065	0.116	5	0.269906		27.8	0.0278	0.116	2	0.44087		0.936756	0.94877	1.34128	0.959011		0.170965
								0.117	65.6	0.0656	0.117	3	0.273954		28	0.028	0.117	3	0.443709		0.944901	0.949589	1.35294	0.959775		0.169754
								0.118	66.5	0.0665	0.118	3	0.278003		28.7	0.0287	0.118	2	0.445601		0.953047	0.950388	1.36461	0.960516		0.167598
								0.119	67.9	0.0679	0.119	1	0.279352		28.7	0.0287	0.119	2	0.447493		0.961193	0.951169	1.37627	0.961236		0.168141
								0.12	68.2	0.0682	0.12	3	0.283401		29.2	0.0292	0.12	0	0.447493		0.969338	0.951932	1.38793	0.961935		0.164092
								0.121	68.4	0.0684	0.121	1	0.28475		29.4	0.0294	0.121	0	0.447493		0.977484	0.952678	1.3996	0.962614		0.162743
								0.122	69.5	0.0695	0.122	3	0.288799		29.4	0.0294	0.122	2	0.449385		0.98563	0.953406	1.41126	0.963273		0.160586
								0.123	70.3	0.0703	0.123	1	0.290148		29.8	0.0298	0.123	4	0.453169		0.993775	0.954117	1.42292	0.963914		0.163021
								0.124	71.1	0.0711	0.124	1	0.291498		29.9	0.0299	0.124	2	0.455061		1.00192	0.954812	1.43459	0.964536		0.163564
								0.125	71.8	0.0718	0.125	1	0.292848		30	0.03	0.125	1	0.456008		1.01007	0.95549	1.44625	0.96514		0.16316
								0.126	72.2	0.0722	0.126	3	0.296896		30.3	0.0303	0.126	2	0.4579		1.01821	0.956153	1.45791	0.965726		0.161004
								0.127	72.2	0.0722	0.127	2	0.299595		30.4	0.0304	0.127	4	0.461684		1.02636	0.956801	1.46958	0.966296		0.162089
								0.128	72.7	0.0727	0.128	4	0.304993		30.4	0.0304	0.128	3	0.464522		1.0345	0.957434	1.48124	0.966849		0.159529
								0.129	72.8	0.0728	0.129	0	0.304993		30.8	0.0308	0.129	1	0.465468		1.04265	0.958052	1.4929	0.967387		0.160475
								0.13	73.1	0.0731	0.13	0	0.304993		30.9	0.0309	0.13	2	0.46736		1.0508	0.958656	1.50457	0.967909		0.162367
								0.131	74.1	0.0741	0.131	0	0.304993		31	0.031	0.131	2	0.469253		1.05894	0.959246	1.51623	0.968416		0.164259
								0.132	74.4	0.0744	0.132	1	0.306343		31.1	0.0311	0.132	3	0.472091		1.06709	0.959823	1.52789	0.968908		0.165748
								0.133	74.8	0.0748	0.133	4	0.311741		31.3	0.0313	0.133	0	0.472091		1.07523	0.960386	1.53956	0.969386		0.16035
								0.134	74.9	0.0749	0.134	3	0.315789		31.5	0.0315	0.134	5	0.476821		1.08338	0.960937	1.55122	0.96985		0.161032
								0.135	76.1	0.0761	0.135	1	0.317139		31.6	0.0316	0.135	2	0.478713		1.09152	0.961474	1.56288	0.970301		0.161574
								0.136	78.2	0.0782	0.136	2	0.319838		31.7	0.0317	0.136	5	0.483444		1.09967	0.961999	1.57455	0.970739		0.163606
								0.137	78.4	0.0784	0.137	1	0.321188		31.8	0.0318	0.137	7	0.490066		1.10782	0.962513	1.58621	0.971165		0.168879
								0.138	78.4	0.0784	0.138	6	0.329285		32	0.032	0.138	0	0.490066		1.11596	0.963014	1.59787	0.971578		0.160781
								0.139	78.7	0.0787	0.139	2	0.331984		32.1	0.0321	0.139	3	0.492904		1.12411	0.963504	1.60954	0.971979		0.160921
								0.14	79.1	0.0791	0.14	0	0.331984		32.3	0.0323	0.14	2	0.494797		1.13225	0.963983	1.6212	0.972369		0.162813
								0.141	79.7	0.0797	0.141	1	0.333333		32.7	0.0327	0.141	3	0.497635		1.1404	0.96445	1.63286	0.972747		0.164301
								0.142	80.6	0.0806	0.142	0	0.333333		32.8	0.0328	0.142	4	0.501419		1.14854	0.964907	1.64453	0.973115		0.168086
								0.143	81	0.081	0.143	2	0.336032		33.3	0.0333	0.143	4	0.505203		1.15669	0.965353	1.65619	0.973472		0.169171
								0.144	81.1	0.0811	0.144	2	0.338731		33.6	0.0336	0.144	2	0.507096		1.16484	0.96579	1.66785	0.973819		0.168364
								0.145	81.1	0.0811	0.145	1	0.340081		33.8	0.0338	0.145	4	0.51088		1.17298	0.966216	1.67952	0.974155		0.170799
								0.146	81.2	0.0812	0.146	2	0.34278		33.9	0.0339	0.146	3	0.513718		1.18113	0.966632	1.69118	0.974483		0.170938
								0.147	81.8	0.0818	0.147	1	0.34413		34.4	0.0344	0.147	4	0.517502		1.18927	0.967039	1.70284	0.9748		0.173373
								0.148	81.9	0.0819	0.148	1	0.345479		34.6	0.0346	0.148	2	0.519395		1.19742	0.967437	1.71451	0.975109		0.173915
								0.149	82.2	0.0822	0.149	2	0.348178		35.2	0.0352	0.149	4	0.523179		1.20556	0.967825	1.72617	0.975408		0.175001
								0.15	82.7	0.0827	0.15	6	0.356275		35.4	0.0354	0.15	2	0.525071		1.21371	0.968204	1.73783	0.9757		0.168796
								0.151	84	0.084	0.151	0	0.356275		35.6	0.0356	0.151	3	0.527909		1.22186	0.968575	1.74949	0.975982		0.171634
								0.152	84	0.084	0.152	2	0.358974		35.6	0.0356	0.152	4	0.531693		1.23	0.968937	1.76116	0.976257		0.172719
								0.153	84.4	0.0844	0.153	0	0.358974		35.6	0.0356	0.153	0	0.531693		1.23815	0.969291	1.77282	0.976523		0.172719
								0.154	86.3	0.0863	0.154	0	0.358974		35.7	0.0357	0.154	2	0.533586		1.24629	0.969637	1.78448	0.976782		0.174611
								0.155	87.3	0.0873	0.155	2	0.361673		35.7	0.0357	0.155	1	0.534532		1.25444	0.969975	1.79615	0.977034		0.172858
								0.156	88.1	0.0881	0.156	1	0.363023		35.9	0.0359	0.156	1	0.535478		1.26258	0.970305	1.80781	0.977278		0.172455
								0.157	88.9	0.0889	0.157	2	0.365722		36.3	0.0363	0.157	3	0.538316		1.27073	0.970628	1.81947	0.977516		0.172594
								0.158	88.9	0.0889	0.158	4	0.37112		36.5	0.0365	0.158	0	0.538316		1.27887	0.970943	1.83114	0.977746		0.167196
								0.159	89	0.089	0.159	2	0.373819		36.6	0.0366	0.159	4	0.5421		1.28702	0.971251	1.8428	0.97797		0.168281
								0.16	89	0.089	0.16	0	0.373819		36.7	0.0367	0.16	1	0.543046		1.29517	0.971552	1.85446	0.978187		0.169227
								0.161	91.6	0.0916	0.161	2	0.376518		36.9	0.0369	0.161	3	0.545885		1.30331	0.971846	1.86613	0.978399		0.169366
								0.162	92.1	0.0921	0.162	0	0.376518		37	0.037	0.162	0	0.545885		1.31146	0.972134	1.87779	0.978604		0.169366
								0.163	92.3	0.0923	0.163	1	0.377868		37	0.037	0.163	3	0.548723		1.3196	0.972415	1.88945	0.978803		0.170855
								0.164	94.4	0.0944	0.164	1	0.379217		37.2	0.0372	0.164	4	0.552507		1.32775	0.972689	1.90112	0.978996		0.17329
								0.165	94.7	0.0947	0.165	0	0.379217		37.5	0.0375	0.165	2	0.554399		1.33589	0.972957	1.91278	0.979184		0.175182
								0.166	94.9	0.0949	0.166	0	0.379217		37.6	0.0376	0.166	1	0.555345		1.34404	0.973219	1.92444	0.979367		0.176128
								0.167	95	0.095	0.167	0	0.379217		37.9	0.0379	0.167	1	0.556291		1.35219	0.973475	1.93611	0.979544		0.177074
								0.168	95.3	0.0953	0.168	0	0.379217		37.9	0.0379	0.168	1	0.557237		1.36033	0.973725	1.94777	0.979716		0.17802
								0.169	95.4	0.0954	0.169	1	0.380567		38.2	0.0382	0.169	3	0.560076		1.36848	0.973969	1.95943	0.979883		0.179509
								0.17	95.6	0.0956	0.17	2	0.383266		38.3	0.0383	0.17	2	0.561968		1.37662	0.974208	1.9711	0.980046		0.178702
								0.171	96.7	0.0967	0.171	2	0.385965		38.5	0.0385	0.171	1	0.562914		1.38477	0.974441	1.98276	0.980203		0.176949
								0.172	97.2	0.0972	0.172	0	0.385965		38.5	0.0385	0.172	2	0.564806		1.39291	0.974669	1.99442	0.980357		0.178841
								0.173	99.4	0.0994	0.173	1	0.387314		39.3	0.0393	0.173	1	0.565752		1.40106	0.974892	2.00609	0.980505		0.178438
								0.174	99.5	0.0995	0.174	2	0.390013		39.5	0.0395	0.174	3	0.56859		1.40921	0.97511	2.01775	0.98065		0.178577
								0.175	100.4	0.1004	0.175	0	0.390013		39.6	0.0396	0.175	1	0.569536		1.41735	0.975322	2.02941	0.98079		0.179523
								0.176	100.8	0.1008	0.176	1	0.391363		39.8	0.0398	0.176	1	0.570482		1.4255	0.97553	2.04108	0.980927		0.179119
								0.177	101.9	0.1019	0.177	0	0.391363		40.3	0.0403	0.177	1	0.571429		1.43364	0.975733	2.05274	0.981059		0.180066
								0.178	102.1	0.1021	0.178	2	0.394062		40.3	0.0403	0.178	3	0.574267		1.44179	0.975932	2.0644	0.981188		0.180205
								0.179	102.7	0.1027	0.179	1	0.395412		40.4	0.0404	0.179	2	0.576159		1.44993	0.976125	2.07607	0.981313		0.180747
								0.18	103.1	0.1031	0.18	0	0.395412		40.4	0.0404	0.18	0	0.576159		1.45808	0.976315	2.08773	0.981434		0.180747
								0.181	105.2	0.1052	0.181	2	0.398111		40.9	0.0409	0.181	3	0.578997		1.46623	0.9765	2.09939	0.981552		0.180887
								0.182	105.4	0.1054	0.182	2	0.40081		41.1	0.0411	0.182	1	0.579943		1.47437	0.976681	2.11106	0.981666		0.179134
								0.183	106.8	0.1068	0.183	0	0.40081		41.4	0.0414	0.183	5	0.584674		1.48252	0.976858	2.12272	0.981777		0.183864
								0.184	107	0.107	0.184	2	0.403509		41.6	0.0416	0.184	0	0.584674		1.49066	0.97703	2.13438	0.981885		0.181165
								0.185	108.7	0.1087	0.185	1	0.404858		41.8	0.0418	0.185	0	0.584674		1.49881	0.977199	2.14605	0.98199		0.179815
								0.186	109.9	0.1099	0.186	1	0.406208		41.9	0.0419	0.186	3	0.587512		1.50695	0.977364	2.15771	0.982092		0.181304
								0.187	110.1	0.1101	0.187	2	0.408907		42.1	0.0421	0.187	2	0.589404		1.5151	0.977525	2.16937	0.982191		0.180497
								0.188	110.7	0.1107	0.188	1	0.410256		42.3	0.0423	0.188	0	0.589404		1.52325	0.977682	2.18104	0.982287		0.179148
								0.189	110.9	0.1109	0.189	2	0.412955		42.5	0.0425	0.189	1	0.59035		1.53139	0.977836	2.1927	0.98238		0.177395
								0.19	111.3	0.1113	0.19	1	0.414305		42.7	0.0427	0.19	1	0.591296		1.53954	0.977986	2.20436	0.982471		0.176991
								0.191	112	0.112	0.191	1	0.415655		42.8	0.0428	0.191	2	0.593188		1.54768	0.978133	2.21603	0.982559		0.177534
								0.192	112.3	0.1123	0.192	0	0.415655		42.9	0.0429	0.192	1	0.594134		1.55583	0.978277	2.22769	0.982645		0.17848
								0.193	112.7	0.1127	0.193	3	0.419703		43	0.043	0.193	1	0.59508		1.56397	0.978417	2.23935	0.982728		0.175377
								0.194	112.8	0.1128	0.194	0	0.419703		43	0.043	0.194	1	0.596026		1.57212	0.978554	2.25102	0.982808		0.176323
								0.195	113.3	0.1133	0.195	0	0.419703		43	0.043	0.195	5	0.600757		1.58027	0.978688	2.26268	0.982887		0.181054
								0.196	115.2	0.1152	0.196	1	0.421053		43.3	0.0433	0.196	5	0.605487		1.58841	0.978819	2.27434	0.982963		0.184435
								0.197	115.3	0.1153	0.197	3	0.425101		43.4	0.0434	0.197	2	0.607379		1.59656	0.978947	2.28601	0.983037		0.182278
								0.198	115.6	0.1156	0.198	1	0.426451		44	0.044	0.198	1	0.608325		1.6047	0.979071	2.29767	0.983108		0.181875
								0.199	115.6	0.1156	0.199	0	0.426451		44.2	0.0442	0.199	4	0.61211		1.61285	0.979193	2.30933	0.983178		0.185659
								0.2	115.8	0.1158	0.2	2	0.42915		44.4	0.0444	0.2	3	0.614948		1.62099	0.979313	2.321	0.983246		0.185798
								0.201	116.3	0.1163	0.201	1	0.430499		45.5	0.0455	0.201	3	0.617786							0.187287
								0.202	116.7	0.1167	0.202	0	0.430499		45.6	0.0456	0.202	0	0.617786							0.187287
								0.203	116.8	0.1168	0.203	2	0.433198		45.9	0.0459	0.203	0	0.617786							0.184588
								0.204	117.4	0.1174	0.204	1	0.434548		46.3	0.0463	0.204	1	0.618732							0.184184
								0.205	117.8	0.1178	0.205	1	0.435897		46.4	0.0464	0.205	2	0.620624							0.184727
								0.206	118	0.118	0.206	0	0.435897		46.6	0.0466	0.206	1	0.62157							0.185673
								0.207	119	0.119	0.207	2	0.438596		46.7	0.0467	0.207	1	0.622517							0.18392
								0.208	119.4	0.1194	0.208	2	0.441296		46.8	0.0468	0.208	2	0.624409							0.183113
								0.209	119.4	0.1194	0.209	1	0.442645		47	0.047	0.209	3	0.627247							0.184602
								0.21	119.8	0.1198	0.21	3	0.446694		47.1	0.0471	0.21	3	0.630085							0.183391
								0.211	120.1	0.1201	0.211	1	0.448043		47.3	0.0473	0.211	1	0.631031							0.182988
								0.212	121.3	0.1213	0.212	1	0.449393		47.3	0.0473	0.212	1	0.631977							0.182585
								0.213	121.4	0.1214	0.213	1	0.450742		47.6	0.0476	0.213	3	0.634816							0.184073
								0.214	122	0.122	0.214	0	0.450742		47.8	0.0478	0.214	2	0.636708							0.185965
								0.215	122.6	0.1226	0.215	2	0.453441		47.8	0.0478	0.215	1	0.637654							0.184212
								0.216	123.4	0.1234	0.216	2	0.45614		47.8	0.0478	0.216	1	0.6386							0.182459
								0.217	124.2	0.1242	0.217	1	0.45749		47.8	0.0478	0.217	1	0.639546							0.182056
								0.218	125.3	0.1253	0.218	1	0.458839		48	0.048	0.218	3	0.642384							0.183545
								0.219	125.5	0.1255	0.219	0	0.458839		48.1	0.0481	0.219	0	0.642384							0.183545
								0.22	126	0.126	0.22	2	0.461538		48.6	0.0486	0.22	1	0.64333							0.181792
								0.221	126.2	0.1262	0.221	0	0.461538		48.6	0.0486	0.221	4	0.647114							0.185576
								0.222	126.7	0.1267	0.222	1	0.462888		48.6	0.0486	0.222	2	0.649007							0.186119
								0.223	127.2	0.1272	0.223	2	0.465587		49	0.049	0.223	0	0.649007							0.18342
								0.224	127.5	0.1275	0.224	1	0.466937		49	0.049	0.224	2	0.650899							0.183962
								0.225	127.6	0.1276	0.225	1	0.468286		49	0.049	0.225	2	0.652791							0.184505
								0.226	128	0.128	0.226	1	0.469636		49.2	0.0492	0.226	0	0.652791							0.183155
								0.227	131.8	0.1318	0.227	1	0.470985		50	0.05	0.227	0	0.652791							0.181806
								0.228	132.3	0.1323	0.228	1	0.472335		51	0.051	0.228	3	0.655629							0.183294
								0.229	132.4	0.1324	0.229	0	0.472335		51.4	0.0514	0.229	1	0.656575							0.184241
								0.23	132.8	0.1328	0.23	2	0.475034		51.4	0.0514	0.23	1	0.657521							0.182488
								0.231	132.9	0.1329	0.231	2	0.477733		51.5	0.0515	0.231	2	0.659413							0.181681
								0.232	133.2	0.1332	0.232	1	0.479082		51.7	0.0517	0.232	1	0.66036							0.181277
								0.233	133.5	0.1335	0.233	1	0.480432		51.8	0.0518	0.233	5	0.66509							0.184658
								0.234	133.6	0.1336	0.234	1	0.481781		51.9	0.0519	0.234	1	0.666036							0.184255
								0.235	134.2	0.1342	0.235	2	0.48448		52.1	0.0521	0.235	2	0.667928							0.183448
								0.236	135.1	0.1351	0.236	3	0.488529		52.1	0.0521	0.236	2	0.66982							0.181291
								0.237	135.4	0.1354	0.237	3	0.492578		52.1	0.0521	0.237	0	0.66982							0.177243
								0.238	136.7	0.1367	0.238	1	0.493927		52.2	0.0522	0.238	1	0.670766							0.176839
								0.239	137.4	0.1374	0.239	0	0.493927		52.3	0.0523	0.239	0	0.670766							0.176839
								0.24	137.6	0.1376	0.24	1	0.495277		52.4	0.0524	0.24	0	0.670766							0.17549
								0.241	137.6	0.1376	0.241	1	0.496626		52.8	0.0528	0.241	0	0.670766							0.17414
								0.242	137.7	0.1377	0.242	2	0.499325		52.8	0.0528	0.242	3	0.673605							0.174279
								0.243	137.9	0.1379	0.243	3	0.503374		52.8	0.0528	0.243	0	0.673605							0.170231
								0.244	138	0.138	0.244	3	0.507422		53	0.053	0.244	2	0.675497							0.168074
								0.245	138.3	0.1383	0.245	1	0.508772		53	0.053	0.245	0	0.675497							0.166725
								0.246	139	0.139	0.246	1	0.510121		53.4	0.0534	0.246	1	0.676443							0.166321
								0.247	140.8	0.1408	0.247	0	0.510121		53.7	0.0537	0.247	0	0.676443							0.166321
								0.248	142.5	0.1425	0.248	4	0.51552		54	0.054	0.248	2	0.678335							0.162815
								0.249	143	0.143	0.249	2	0.518219		54.3	0.0543	0.249	2	0.680227							0.162008
								0.25	143.9	0.1439	0.25	2	0.520918		54.6	0.0546	0.25	4	0.684011							0.163094
								0.251	144	0.144	0.251	1	0.522267		54.6	0.0546	0.251	2	0.685904							0.163636
								0.252	144.4	0.1444	0.252	1	0.523617		55	0.055	0.252	0	0.685904							0.162287
								0.253	145.1	0.1451	0.253	1	0.524966		55.2	0.0552	0.253	1	0.68685							0.161883
								0.254	145.5	0.1455	0.254	1	0.526316		55.9	0.0559	0.254	1	0.687796							0.16148
								0.255	146.2	0.1462	0.255	3	0.530364		56	0.056	0.255	1	0.688742							0.158377
								0.256	147.6	0.1476	0.256	0	0.530364		56.2	0.0562	0.256	2	0.690634							0.160269
								0.257	148.3	0.1483	0.257	1	0.531714		56.6	0.0566	0.257	0	0.690634							0.15892
								0.258	148.7	0.1487	0.258	0	0.531714		56.7	0.0567	0.258	0	0.690634							0.15892
								0.259	149.1	0.1491	0.259	0	0.531714		56.7	0.0567	0.259	0	0.690634							0.15892
								0.26	149.4	0.1494	0.26	5	0.538462		57.2	0.0572	0.26	0	0.690634							0.152172
								0.261	149.6	0.1496	0.261	3	0.54251		57.5	0.0575	0.261	0	0.690634							0.148124
								0.262	149.8	0.1498	0.262	0	0.54251		57.9	0.0579	0.262	1	0.69158							0.14907
								0.263	149.9	0.1499	0.263	2	0.545209		58	0.058	0.263	0	0.69158							0.146371
								0.264	150	0.15	0.264	1	0.546559		58	0.058	0.264	3	0.694418							0.147859
								0.265	151.4	0.1514	0.265	2	0.549258		58.1	0.0581	0.265	0	0.694418							0.14516
								0.266	151.8	0.1518	0.266	0	0.549258		58.2	0.0582	0.266	1	0.695364							0.146106
								0.267	154.4	0.1544	0.267	4	0.554656		58.4	0.0584	0.267	2	0.697256							0.142601
								0.268	154.7	0.1547	0.268	0	0.554656		58.6	0.0586	0.268	1	0.698202							0.143547
								0.269	156	0.156	0.269	1	0.556005		59.1	0.0591	0.269	2	0.700095							0.144089
								0.27	156.2	0.1562	0.27	1	0.557355		59.4	0.0594	0.27	1	0.701041							0.143686
								0.271	157	0.157	0.271	1	0.558704		59.5	0.0595	0.271	2	0.702933							0.144228
								0.272	157.1	0.1571	0.272	1	0.560054		59.6	0.0596	0.272	3	0.705771							0.145717
								0.273	157.6	0.1576	0.273	1	0.561404		60	0.06	0.273	0	0.705771							0.144368
								0.274	158	0.158	0.274	3	0.565452		60	0.06	0.274	0	0.705771							0.140319
								0.275	158	0.158	0.275	1	0.566802		60.1	0.0601	0.275	3	0.708609							0.141808
								0.276	158.1	0.1581	0.276	1	0.568151		60.2	0.0602	0.276	1	0.709555							0.141404
								0.277	158.9	0.1589	0.277	0	0.568151		60.7	0.0607	0.277	3	0.712394							0.144242
								0.278	160.1	0.1601	0.278	1	0.569501		60.8	0.0608	0.278	4	0.716178							0.146677
								0.279	160.6	0.1606	0.279	1	0.57085		61.1	0.0611	0.279	0	0.716178							0.145328
								0.28	162.9	0.1629	0.28	1	0.5722		61.2	0.0612	0.28	0	0.716178							0.143978
								0.281	163.8	0.1638	0.281	2	0.574899		61.6	0.0616	0.281	0	0.716178							0.141279
								0.282	168.6	0.1686	0.282	1	0.576248		61.7	0.0617	0.282	2	0.71807							0.141822
								0.283	169.1	0.1691	0.283	2	0.578947		61.7	0.0617	0.283	0	0.71807							0.139123
								0.284	169.8	0.1698	0.284	2	0.581646		61.9	0.0619	0.284	0	0.71807							0.136424
								0.285	170.4	0.1704	0.285	0	0.581646		62.8	0.0628	0.285	0	0.71807							0.136424
								0.286	170.8	0.1708	0.286	0	0.581646		63.2	0.0632	0.286	0	0.71807							0.136424
								0.287	172.4	0.1724	0.287	2	0.584345		63.7	0.0637	0.287	1	0.719016							0.134671
								0.288	173.3	0.1733	0.288	0	0.584345		64	0.064	0.288	1	0.719962							0.135617
								0.289	173.8	0.1738	0.289	2	0.587045		64.1	0.0641	0.289	1	0.720908							0.133864
								0.29	175.9	0.1759	0.29	0	0.587045		64.3	0.0643	0.29	1	0.721854							0.13481
								0.291	177.1	0.1771	0.291	0	0.587045		64.4	0.0644	0.291	1	0.7228							0.135756
								0.292	177.2	0.1772	0.292	0	0.587045		64.9	0.0649	0.292	2	0.724693							0.137648
								0.293	178.2	0.1782	0.293	1	0.588394		65.2	0.0652	0.293	3	0.727531							0.139137
								0.294	180.1	0.1801	0.294	0	0.588394		65.3	0.0653	0.294	1	0.728477							0.140083
								0.295	180.5	0.1805	0.295	1	0.589744		65.7	0.0657	0.295	2	0.730369							0.140625
								0.296	181.5	0.1815	0.296	1	0.591093		65.8	0.0658	0.296	0	0.730369							0.139276
								0.297	182	0.182	0.297	1	0.592443		66.2	0.0662	0.297	1	0.731315							0.138872
								0.298	183.4	0.1834	0.298	1	0.593792		66.3	0.0663	0.298	0	0.731315							0.137523
								0.299	183.6	0.1836	0.299	0	0.593792		66.4	0.0664	0.299	1	0.732261							0.138469
								0.3	184.7	0.1847	0.3	1	0.595142		66.7	0.0667	0.3	1	0.733207							0.138065
								0.301	185.1	0.1851	0.301	0	0.595142		67.4	0.0674	0.301	1	0.734153							0.139012
								0.302	186.8	0.1868	0.302	1	0.596491		67.8	0.0678	0.302	1	0.735099							0.138608
								0.303	187	0.187	0.303	0	0.596491		67.8	0.0678	0.303	2	0.736991							0.1405
								0.304	187.2	0.1872	0.304	0	0.596491		68.1	0.0681	0.304	0	0.736991							0.1405
								0.305	188.7	0.1887	0.305	2	0.59919		68.2	0.0682	0.305	0	0.736991							0.137801
								0.306	188.7	0.1887	0.306	0	0.59919		68.5	0.0685	0.306	1	0.737938							0.138747
								0.307	189.7	0.1897	0.307	2	0.601889		68.6	0.0686	0.307	0	0.737938							0.136048
								0.308	191	0.191	0.308	1	0.603239		68.6	0.0686	0.308	2	0.73983							0.136591
								0.309	192.3	0.1923	0.309	0	0.603239		68.7	0.0687	0.309	2	0.741722							0.138483
								0.31	192.8	0.1928	0.31	0	0.603239		68.7	0.0687	0.31	1	0.742668							0.139429
								0.311	192.9	0.1929	0.311	0	0.603239		68.8	0.0688	0.311	1	0.743614							0.140375
								0.312	195.5	0.1955	0.312	0	0.603239		69.2	0.0692	0.312	3	0.746452							0.143213
								0.313	196.6	0.1966	0.313	2	0.605938		69.7	0.0697	0.313	1	0.747398							0.14146
								0.314	196.8	0.1968	0.314	1	0.607287		69.8	0.0698	0.314	1	0.748344							0.141057
								0.315	196.8	0.1968	0.315	0	0.607287		70.2	0.0702	0.315	0	0.748344							0.141057
								0.316	197.4	0.1974	0.316	0	0.607287		70.2	0.0702	0.316	1	0.74929							0.142003
								0.317	199.5	0.1995	0.317	1	0.608637		70.9	0.0709	0.317	0	0.74929							0.140653
								0.318	199.6	0.1996	0.318	0	0.608637		71.3	0.0713	0.318	2	0.751183							0.142546
								0.319	200.5	0.2005	0.319	0	0.608637		71.4	0.0714	0.319	1	0.752129							0.143492
								0.32	202.3	0.2023	0.32	0	0.608637		71.4	0.0714	0.32	0	0.752129							0.143492
								0.321	202.4	0.2024	0.321	0	0.608637		71.5	0.0715	0.321	3	0.754967							0.14633
								0.322	203.7	0.2037	0.322	0	0.608637		71.5	0.0715	0.322	1	0.755913							0.147276
								0.323	204.6	0.2046	0.323	1	0.609987		71.8	0.0718	0.323	1	0.756859							0.146873
								0.324	206.2	0.2062	0.324	1	0.611336		72.4	0.0724	0.324	1	0.757805							0.146469
								0.325	206.2	0.2062	0.325	2	0.614035		72.6	0.0726	0.325	0	0.757805							0.14377
								0.326	207.1	0.2071	0.326	1	0.615385		72.7	0.0727	0.326	0	0.757805							0.14242
								0.327	208	0.208	0.327	1	0.616734		72.9	0.0729	0.327	1	0.758751							0.142017
								0.328	208.7	0.2087	0.328	0	0.616734		72.9	0.0729	0.328	0	0.758751							0.142017
								0.329	209.2	0.2092	0.329	2	0.619433		73	0.073	0.329	1	0.759697							0.140264
								0.33	209.3	0.2093	0.33	1	0.620783		73.3	0.0733	0.33	1	0.760643							0.139861
								0.331	209.6	0.2096	0.331	2	0.623482		73.4	0.0734	0.331	1	0.761589							0.138108
								0.332	211	0.211	0.332	3	0.62753		73.5	0.0735	0.332	2	0.763482							0.135951
								0.333	211.3	0.2113	0.333	1	0.62888		74	0.074	0.333	1	0.764428							0.135548
								0.334	212.1	0.2121	0.334	1	0.630229		74	0.074	0.334	1	0.765374							0.135144
								0.335	214.2	0.2142	0.335	0	0.630229		74.2	0.0742	0.335	1	0.76632							0.13609
								0.336	214.4	0.2144	0.336	0	0.630229		74.2	0.0742	0.336	0	0.76632							0.13609
								0.337	215.3	0.2153	0.337	1	0.631579		74.7	0.0747	0.337	4	0.770104							0.138525
								0.338	215.7	0.2157	0.338	0	0.631579		75.7	0.0757	0.338	0	0.770104							0.138525
								0.339	216.2	0.2162	0.339	0	0.631579		76.2	0.0762	0.339	0	0.770104							0.138525
								0.34	217.2	0.2172	0.34	1	0.632928		76.5	0.0765	0.34	1	0.77105							0.138122
								0.341	219.5	0.2195	0.341	0	0.632928		77.2	0.0772	0.341	0	0.77105							0.138122
								0.342	219.8	0.2198	0.342	2	0.635628		77.3	0.0773	0.342	0	0.77105							0.135423
								0.343	222	0.222	0.343	4	0.641026		78.2	0.0782	0.343	0	0.77105							0.130025
								0.344	222.1	0.2221	0.344	1	0.642375		78.8	0.0788	0.344	0	0.77105							0.128675
								0.345	222.3	0.2223	0.345	1	0.643725		78.8	0.0788	0.345	0	0.77105							0.127325
								0.346	223.8	0.2238	0.346	1	0.645074		78.8	0.0788	0.346	2	0.772942							0.127868
								0.347	224.6	0.2246	0.347	0	0.645074		79	0.079	0.347	0	0.772942							0.127868
								0.348	225.4	0.2254	0.348	1	0.646424		79.1	0.0791	0.348	1	0.773888							0.127465
								0.349	226.3	0.2263	0.349	1	0.647773		79.1	0.0791	0.349	0	0.773888							0.126115
								0.35	227.4	0.2274	0.35	0	0.647773		79.4	0.0794	0.35	1	0.774834							0.127061
								0.351	229.1	0.2291	0.351	0	0.647773		79.7	0.0797	0.351	0	0.774834							0.127061
								0.352	229.6	0.2296	0.352	1	0.649123		79.8	0.0798	0.352	0	0.774834							0.125712
								0.353	230.3	0.2303	0.353	0	0.649123		79.8	0.0798	0.353	0	0.774834							0.125712
								0.354	230.8	0.2308	0.354	2	0.651822		80	0.08	0.354	0	0.774834							0.123013
								0.355	231.3	0.2313	0.355	0	0.651822		80	0.08	0.355	0	0.774834							0.123013
								0.356	232.7	0.2327	0.356	0	0.651822		81.5	0.0815	0.356	1	0.775781							0.123959
								0.357	233.7	0.2337	0.357	3	0.65587		81.5	0.0815	0.357	1	0.776727							0.120856
								0.358	234.5	0.2345	0.358	1	0.65722		81.9	0.0819	0.358	0	0.776727							0.119507
								0.359	234.8	0.2348	0.359	0	0.65722		82.3	0.0823	0.359	0	0.776727							0.119507
								0.36	235.2	0.2352	0.36	2	0.659919		82.7	0.0827	0.36	0	0.776727							0.116808
								0.361	235.5	0.2355	0.361	1	0.661269		83.4	0.0834	0.361	1	0.777673							0.116404
								0.362	235.6	0.2356	0.362	0	0.661269		83.5	0.0835	0.362	0	0.777673							0.116404
								0.363	236.8	0.2368	0.363	1	0.662618		83.8	0.0838	0.363	1	0.778619							0.116001
								0.364	236.8	0.2368	0.364	0	0.662618		83.9	0.0839	0.364	0	0.778619							0.116001
								0.365	236.9	0.2369	0.365	0	0.662618		83.9	0.0839	0.365	1	0.779565							0.116947
								0.366	237.6	0.2376	0.366	1	0.663968		84.2	0.0842	0.366	1	0.780511							0.116543
								0.367	239.5	0.2395	0.367	1	0.665317		84.2	0.0842	0.367	0	0.780511							0.115194
								0.368	240.6	0.2406	0.368	1	0.666667		85.4	0.0854	0.368	1	0.781457							0.11479
								0.369	241.4	0.2414	0.369	0	0.666667		85.4	0.0854	0.369	2	0.783349							0.116682
								0.37	241.7	0.2417	0.37	0	0.666667		85.8	0.0858	0.37	1	0.784295							0.117629
								0.371	242.5	0.2425	0.371	0	0.666667		85.9	0.0859	0.371	1	0.785241							0.118575
								0.372	242.6	0.2426	0.372	1	0.668016		86.2	0.0862	0.372	0	0.785241							0.117225
								0.373	242.8	0.2428	0.373	0	0.668016		86.2	0.0862	0.373	1	0.786187							0.118171
								0.374	243.1	0.2431	0.374	0	0.668016		86.4	0.0864	0.374	0	0.786187							0.118171
								0.375	243.1	0.2431	0.375	2	0.670715		86.5	0.0865	0.375	0	0.786187							0.115472
								0.376	243.5	0.2435	0.376	0	0.670715		87.1	0.0871	0.376	0	0.786187							0.115472
								0.377	244.6	0.2446	0.377	1	0.672065		87.5	0.0875	0.377	1	0.787133							0.115069
								0.378	246	0.246	0.378	1	0.673414		87.5	0.0875	0.378	0	0.787133							0.113719
								0.379	247.3	0.2473	0.379	2	0.676113		87.8	0.0878	0.379	0	0.787133							0.11102
								0.38	247.7	0.2477	0.38	0	0.676113		87.9	0.0879	0.38	0	0.787133							0.11102
								0.381	247.9	0.2479	0.381	0	0.676113		88.6	0.0886	0.381	0	0.787133							0.11102
								0.382	248	0.248	0.382	2	0.678812		88.7	0.0887	0.382	0	0.787133							0.108321
								0.383	248.6	0.2486	0.383	0	0.678812		89.5	0.0895	0.383	0	0.787133							0.108321
								0.384	249	0.249	0.384	1	0.680162		89.6	0.0896	0.384	0	0.787133							0.106971
								0.385	249.7	0.2497	0.385	0	0.680162		89.6	0.0896	0.385	1	0.788079							0.107918
								0.386	250	0.25	0.386	0	0.680162		89.7	0.0897	0.386	1	0.789026							0.108864
								0.387	250.3	0.2503	0.387	0	0.680162		89.9	0.0899	0.387	3	0.791864							0.111702
								0.388	251.8	0.2518	0.388	0	0.680162		90.1	0.0901	0.388	1	0.79281							0.112648
								0.389	252.4	0.2524	0.389	0	0.680162		90.9	0.0909	0.389	0	0.79281							0.112648
								0.39	253.4	0.2534	0.39	1	0.681511		91.3	0.0913	0.39	1	0.793756							0.112244
								0.391	254.2	0.2542	0.391	0	0.681511		91.9	0.0919	0.391	1	0.794702							0.113191
								0.392	254.2	0.2542	0.392	3	0.68556		91.9	0.0919	0.392	3	0.79754							0.11198
								0.393	254.4	0.2544	0.393	0	0.68556		92.4	0.0924	0.393	1	0.798486							0.112926
								0.394	256.9	0.2569	0.394	0	0.68556		92.5	0.0925	0.394	2	0.800378							0.114818
								0.395	259.2	0.2592	0.395	1	0.68691		92.6	0.0926	0.395	0	0.800378							0.113469
								0.396	259.3	0.2593	0.396	0	0.68691		92.6	0.0926	0.396	1	0.801325							0.114415
								0.397	259.9	0.2599	0.397	2	0.689609		93.2	0.0932	0.397	1	0.802271							0.112662
								0.398	259.9	0.2599	0.398	1	0.690958		93.6	0.0936	0.398	1	0.803217							0.112258
								0.399	260	0.26	0.399	0	0.690958		94.1	0.0941	0.399	2	0.805109							0.114151
								0.4	260.1	0.2601	0.4	1	0.692308		94.3	0.0943	0.4	0	0.805109							0.112801
								0.401	260.2	0.2602	0.401	0	0.692308		94.5	0.0945	0.401	1	0.806055							0.113747
								0.402	260.9	0.2609	0.402	0	0.692308		94.8	0.0948	0.402	0	0.806055							0.113747
								0.403	262.2	0.2622	0.403	0	0.692308		95.6	0.0956	0.403	3	0.808893							0.116585
								0.404	262.2	0.2622	0.404	0	0.692308		95.7	0.0957	0.404	0	0.808893							0.116585
								0.405	263.2	0.2632	0.405	2	0.695007		95.8	0.0958	0.405	0	0.808893							0.113886
								0.406	264.6	0.2646	0.406	0	0.695007		95.8	0.0958	0.406	2	0.810785							0.115778
								0.407	265	0.265	0.407	2	0.697706		95.9	0.0959	0.407	2	0.812677							0.114972
								0.408	266.2	0.2662	0.408	1	0.699055		95.9	0.0959	0.408	2	0.81457							0.115514
								0.409	266.3	0.2663	0.409	1	0.700405		96.4	0.0964	0.409	0	0.81457							0.114165
								0.41	266.8	0.2668	0.41	0	0.700405		96.6	0.0966	0.41	0	0.81457							0.114165
								0.411	267	0.267	0.411	2	0.703104		96.8	0.0968	0.411	1	0.815516							0.112412
								0.412	268.5	0.2685	0.412	0	0.703104		96.9	0.0969	0.412	0	0.815516							0.112412
								0.413	269.7	0.2697	0.413	1	0.704453		97.4	0.0974	0.413	0	0.815516							0.111062
								0.414	270.6	0.2706	0.414	0	0.704453		97.5	0.0975	0.414	0	0.815516							0.111062
								0.415	271.9	0.2719	0.415	1	0.705803		97.5	0.0975	0.415	1	0.816462							0.110659
								0.416	272.9	0.2729	0.416	1	0.707152		97.7	0.0977	0.416	0	0.816462							0.109309
								0.417	273.1	0.2731	0.417	0	0.707152		98	0.098	0.417	0	0.816462							0.109309
								0.418	273.2	0.2732	0.418	0	0.707152		98.5	0.0985	0.418	1	0.817408							0.110255
								0.419	273.8	0.2738	0.419	1	0.708502		99.9	0.0999	0.419	1	0.818354							0.109852
								0.42	274.4	0.2744	0.42	0	0.708502		100.3	0.1003	0.42	0	0.818354							0.109852
								0.421	275.4	0.2754	0.421	0	0.708502		100.5	0.1005	0.421	0	0.818354							0.109852
								0.422	277.9	0.2779	0.422	1	0.709852		100.8	0.1008	0.422	0	0.818354							0.108502
								0.423	279	0.279	0.423	1	0.711201		101.1	0.1011	0.423	0	0.818354							0.107153
								0.424	279.4	0.2794	0.424	0	0.711201		101.6	0.1016	0.424	1	0.8193							0.108099
								0.425	280.1	0.2801	0.425	0	0.711201		102	0.102	0.425	0	0.8193							0.108099
								0.426	280.7	0.2807	0.426	0	0.711201		102.1	0.1021	0.426	0	0.8193							0.108099
								0.427	281.8	0.2818	0.427	2	0.7139		102.6	0.1026	0.427	1	0.820246							0.106346
								0.428	282.4	0.2824	0.428	0	0.7139		102.7	0.1027	0.428	0	0.820246							0.106346
								0.429	282.6	0.2826	0.429	2	0.716599		102.9	0.1029	0.429	0	0.820246							0.103647
								0.43	283.4	0.2834	0.43	0	0.716599		103.6	0.1036	0.43	1	0.821192							0.104593
								0.431	283.9	0.2839	0.431	1	0.717949		103.7	0.1037	0.431	1	0.822138							0.104189
								0.432	286.1	0.2861	0.432	1	0.719298		103.8	0.1038	0.432	1	0.823084							0.103786
								0.433	286.5	0.2865	0.433	1	0.720648		104	0.104	0.433	1	0.82403							0.103383
								0.434	288.5	0.2885	0.434	0	0.720648		104.1	0.1041	0.434	0	0.82403							0.103383
								0.435	289	0.289	0.435	0	0.720648		104.5	0.1045	0.435	0	0.82403							0.103383
								0.436	292.5	0.2925	0.436	0	0.720648		104.8	0.1048	0.436	0	0.82403							0.103383
								0.437	294.4	0.2944	0.437	1	0.721997		104.9	0.1049	0.437	0	0.82403							0.102033
								0.438	295.2	0.2952	0.438	0	0.721997		105	0.105	0.438	2	0.825922							0.103925
								0.439	296.3	0.2963	0.439	0	0.721997		105.3	0.1053	0.439	0	0.825922							0.103925
								0.44	297.9	0.2979	0.44	2	0.724696		105.6	0.1056	0.44	2	0.827815							0.103118
								0.441	299.9	0.2999	0.441	3	0.728745		106.6	0.1066	0.441	2	0.829707							0.100962
								0.442	301.1	0.3011	0.442	0	0.728745		106.7	0.1067	0.442	0	0.829707							0.100962
								0.443	304.3	0.3043	0.443	0	0.728745		107.4	0.1074	0.443	0	0.829707							0.100962
								0.444	304.3	0.3043	0.444	0	0.728745		107.5	0.1075	0.444	0	0.829707							0.100962
								0.445	306.4	0.3064	0.445	0	0.728745		107.9	0.1079	0.445	0	0.829707							0.100962
								0.446	307	0.307	0.446	1	0.730094		108.1	0.1081	0.446	0	0.829707							0.0996123
								0.447	307.6	0.3076	0.447	1	0.731444		108.9	0.1089	0.447	0	0.829707							0.0982627
								0.448	312.4	0.3124	0.448	2	0.734143		109	0.109	0.448	2	0.831599							0.0974558
								0.449	313	0.313	0.449	1	0.735493		109.5	0.1095	0.449	1	0.832545							0.0970524
								0.45	313.3	0.3133	0.45	1	0.736842		109.8	0.1098	0.45	0	0.832545							0.0957028
								0.451	317	0.317	0.451	1	0.738192		109.9	0.1099	0.451	1	0.833491							0.0952994
								0.452	322.7	0.3227	0.452	0	0.738192		110.7	0.1107	0.452	1	0.834437							0.0962455
								0.453	323.4	0.3234	0.453	1	0.739541		111	0.111	0.453	0	0.834437							0.0948959
								0.454	324.4	0.3244	0.454	1	0.740891		111	0.111	0.454	0	0.834437							0.0935464
								0.455	325	0.325	0.455	1	0.74224		111.9	0.1119	0.455	1	0.835383							0.0931429
								0.456	325.6	0.3256	0.456	0	0.74224		112.8	0.1128	0.456	0	0.835383							0.0931429
								0.457	326.9	0.3269	0.457	1	0.74359		113.7	0.1137	0.457	0	0.835383							0.0917934
								0.458	328.2	0.3282	0.458	1	0.744939		113.9	0.1139	0.458	0	0.835383							0.0904439
								0.459	328.2	0.3282	0.459	0	0.744939		114	0.114	0.459	2	0.837275							0.092336
								0.46	329.4	0.3294	0.46	0	0.744939		114	0.114	0.46	1	0.838221							0.0932821
								0.461	330.1	0.3301	0.461	0	0.744939		114.3	0.1143	0.461	1	0.839167							0.0942282
								0.462	330.8	0.3308	0.462	0	0.744939		114.4	0.1144	0.462	1	0.840114							0.0951743
								0.463	331.6	0.3316	0.463	0	0.744939		114.7	0.1147	0.463	0	0.840114							0.0951743
								0.464	331.7	0.3317	0.464	0	0.744939		114.8	0.1148	0.464	0	0.840114							0.0951743
								0.465	331.8	0.3318	0.465	1	0.746289		115.2	0.1152	0.465	1	0.84106							0.0947708
								0.466	332.4	0.3324	0.466	0	0.746289		115.8	0.1158	0.466	1	0.842006							0.0957169
								0.467	333.5	0.3335	0.467	1	0.747638		116.9	0.1169	0.467	0	0.842006							0.0943673
								0.468	337	0.337	0.468	1	0.748988		116.9	0.1169	0.468	3	0.844844							0.095856
								0.469	339.4	0.3394	0.469	0	0.748988		117	0.117	0.469	0	0.844844							0.095856
								0.47	341.4	0.3414	0.47	0	0.748988		117.4	0.1174	0.47	2	0.846736							0.0977482
								0.471	341.4	0.3414	0.471	0	0.748988		117.6	0.1176	0.471	0	0.846736							0.0977482
								0.472	342.1	0.3421	0.472	0	0.748988		118.1	0.1181	0.472	1	0.847682							0.0986943
								0.473	342.3	0.3423	0.473	0	0.748988		118.7	0.1187	0.473	1	0.848628							0.0996403
								0.474	342.6	0.3426	0.474	2	0.751687		121.6	0.1216	0.474	0	0.848628							0.0969413
								0.475	342.9	0.3429	0.475	0	0.751687		121.6	0.1216	0.475	0	0.848628							0.0969413
								0.476	343.2	0.3432	0.476	0	0.751687		122.1	0.1221	0.476	0	0.848628							0.0969413
								0.477	344.9	0.3449	0.477	0	0.751687		122.6	0.1226	0.477	0	0.848628							0.0969413
								0.478	345.5	0.3455	0.478	0	0.751687		122.7	0.1227	0.478	0	0.848628							0.0969413
								0.479	347.4	0.3474	0.479	0	0.751687		123	0.123	0.479	1	0.849574							0.0978874
								0.48	348.1	0.3481	0.48	0	0.751687		123.1	0.1231	0.48	0	0.849574							0.0978874
								0.481	351.1	0.3511	0.481	0	0.751687		123.7	0.1237	0.481	0	0.849574							0.0978874
								0.482	353.2	0.3532	0.482	1	0.753036		124.5	0.1245	0.482	0	0.849574							0.0965378
								0.483	353.8	0.3538	0.483	0	0.753036		125.1	0.1251	0.483	0	0.849574							0.0965378
								0.484	356.2	0.3562	0.484	0	0.753036		125.6	0.1256	0.484	1	0.85052							0.0974839
								0.485	356.2	0.3562	0.485	0	0.753036		126.1	0.1261	0.485	1	0.851466							0.09843
								0.486	356.7	0.3567	0.486	1	0.754386		126.3	0.1263	0.486	0	0.851466							0.0970804
								0.487	357.5	0.3575	0.487	1	0.755735		126.6	0.1266	0.487	1	0.852412							0.096677
								0.488	359.4	0.3594	0.488	0	0.755735		126.7	0.1267	0.488	1	0.853359							0.0976231
								0.489	359.5	0.3595	0.489	0	0.755735		127.6	0.1276	0.489	0	0.853359							0.0976231
								0.49	360.8	0.3608	0.49	0	0.755735		127.7	0.1277	0.49	0	0.853359							0.0976231
								0.491	362.8	0.3628	0.491	0	0.755735		128	0.128	0.491	0	0.853359							0.0976231
								0.492	365.8	0.3658	0.492	0	0.755735		128.9	0.1289	0.492	0	0.853359							0.0976231
								0.493	366.6	0.3666	0.493	0	0.755735		129.1	0.1291	0.493	1	0.854305							0.0985691
								0.494	367.5	0.3675	0.494	0	0.755735		129.4	0.1294	0.494	0	0.854305							0.0985691
								0.495	371.4	0.3714	0.495	0	0.755735		130.8	0.1308	0.495	1	0.855251							0.0995152
								0.496	374.4	0.3744	0.496	1	0.757085		131	0.131	0.496	1	0.856197							0.0991118
								0.497	374.9	0.3749	0.497	1	0.758435		131.2	0.1312	0.497	1	0.857143							0.0987083
								0.498	376.5	0.3765	0.498	0	0.758435		131.4	0.1314	0.498	0	0.857143							0.0987083
								0.499	377.1	0.3771	0.499	0	0.758435		132	0.132	0.499	0	0.857143							0.0987083
								0.5	378.2	0.3782	0.5	0	0.758435		133.5	0.1335	0.5	1	0.858089							0.0996544
								0.501	378.8	0.3788	0.501	0	0.758435		133.5	0.1335	0.501	2	0.859981							0.101547
								0.502	381.1	0.3811	0.502	0	0.758435		133.9	0.1339	0.502	1	0.860927							0.102493
								0.503	382	0.382	0.503	1	0.759784		133.9	0.1339	0.503	1	0.861873							0.102089
								0.504	383.2	0.3832	0.504	0	0.759784		134	0.134	0.504	1	0.862819							0.103035
								0.505	389.7	0.3897	0.505	1	0.761134		134.3	0.1343	0.505	0	0.862819							0.101686
								0.506	391.3	0.3913	0.506	0	0.761134		134.9	0.1349	0.506	0	0.862819							0.101686
								0.507	391.8	0.3918	0.507	0	0.761134		135.2	0.1352	0.507	0	0.862819							0.101686
								0.508	392	0.392	0.508	1	0.762483		135.3	0.1353	0.508	0	0.862819							0.100336
								0.509	394.8	0.3948	0.509	2	0.765182		135.3	0.1353	0.509	1	0.863765							0.0985832
								0.51	396.6	0.3966	0.51	0	0.765182		135.6	0.1356	0.51	1	0.864711							0.0995293
								0.511	396.8	0.3968	0.511	0	0.765182		135.9	0.1359	0.511	0	0.864711							0.0995293
								0.512	397.6	0.3976	0.512	0	0.765182		136.1	0.1361	0.512	0	0.864711							0.0995293
								0.513	400	0.4	0.513	2	0.767881		136.2	0.1362	0.513	0	0.864711							0.0968302
								0.514	404.2	0.4042	0.514	0	0.767881		136.3	0.1363	0.514	0	0.864711							0.0968302
								0.515	404.7	0.4047	0.515	1	0.769231		136.6	0.1366	0.515	0	0.864711							0.0954807
								0.516	406.2	0.4062	0.516	1	0.77058		136.7	0.1367	0.516	1	0.865658							0.0950772
								0.517	407	0.407	0.517	1	0.77193		136.8	0.1368	0.517	1	0.866604							0.0946738
								0.518	408	0.408	0.518	1	0.773279		136.9	0.1369	0.518	0	0.866604							0.0933242
								0.519	409	0.409	0.519	1	0.774629		138.7	0.1387	0.519	0	0.866604							0.0919747
								0.52	410.2	0.4102	0.52	0	0.774629		139	0.139	0.52	1	0.86755							0.0929208
								0.521	410.2	0.4102	0.521	0	0.774629		139	0.139	0.521	0	0.86755							0.0929208
								0.522	412.2	0.4122	0.522	0	0.774629		139.3	0.1393	0.522	0	0.86755							0.0929208
								0.523	414.7	0.4147	0.523	2	0.777328		139.8	0.1398	0.523	0	0.86755							0.0902217
								0.524	415.9	0.4159	0.524	0	0.777328		140.3	0.1403	0.524	1	0.868496							0.0911678
								0.525	419	0.419	0.525	0	0.777328		141	0.141	0.525	0	0.868496							0.0911678
								0.526	421.8	0.4218	0.526	0	0.777328		141	0.141	0.526	0	0.868496							0.0911678
								0.527	422.6	0.4226	0.527	2	0.780027		141.4	0.1414	0.527	0	0.868496							0.0884688
								0.528	426.3	0.4263	0.528	0	0.780027		141.6	0.1416	0.528	0	0.868496							0.0884688
								0.529	426.6	0.4266	0.529	0	0.780027		141.6	0.1416	0.529	0	0.868496							0.0884688
								0.53	428.5	0.4285	0.53	0	0.780027		141.9	0.1419	0.53	1	0.869442							0.0894148
								0.531	428.7	0.4287	0.531	0	0.780027		142.9	0.1429	0.531	0	0.869442							0.0894148
								0.532	430.4	0.4304	0.532	1	0.781377		143	0.143	0.532	0	0.869442							0.0880653
								0.533	431.1	0.4311	0.533	0	0.781377		143	0.143	0.533	0	0.869442							0.0880653
								0.534	432.8	0.4328	0.534	0	0.781377		143	0.143	0.534	0	0.869442							0.0880653
								0.535	436.6	0.4366	0.535	1	0.782726		143.6	0.1436	0.535	1	0.870388							0.0876618
								0.536	439.2	0.4392	0.536	2	0.785425		143.8	0.1438	0.536	0	0.870388							0.0849628
								0.537	439.4	0.4394	0.537	2	0.788124		144.1	0.1441	0.537	0	0.870388							0.0822637
								0.538	440.2	0.4402	0.538	0	0.788124		144.5	0.1445	0.538	0	0.870388							0.0822637
								0.539	440.4	0.4404	0.539	1	0.789474		144.6	0.1446	0.539	0	0.870388							0.0809142
								0.54	441	0.441	0.54	1	0.790823		144.8	0.1448	0.54	1	0.871334							0.0805108
								0.541	445.3	0.4453	0.541	0	0.790823		145.4	0.1454	0.541	1	0.87228							0.0814568
								0.542	446.8	0.4468	0.542	0	0.790823		145.5	0.1455	0.542	2	0.874172							0.083349
								0.543	447.4	0.4474	0.543	0	0.790823		145.9	0.1459	0.543	0	0.874172							0.083349
								0.544	447.8	0.4478	0.544	0	0.790823		146.2	0.1462	0.544	0	0.874172							0.083349
								0.545	448.6	0.4486	0.545	0	0.790823		146.2	0.1462	0.545	1	0.875118							0.084295
								0.546	449.6	0.4496	0.546	0	0.790823		146.7	0.1467	0.546	0	0.875118							0.084295
								0.547	450.5	0.4505	0.547	0	0.790823		146.8	0.1468	0.547	0	0.875118							0.084295
								0.548	452.2	0.4522	0.548	0	0.790823		147.3	0.1473	0.548	0	0.875118							0.084295
								0.549	454	0.454	0.549	2	0.793522		147.8	0.1478	0.549	0	0.875118							0.081596
								0.55	454.2	0.4542	0.55	0	0.793522		148.5	0.1485	0.55	0	0.875118							0.081596
								0.551	456.4	0.4564	0.551	1	0.794872		148.6	0.1486	0.551	0	0.875118							0.0802465
								0.552	457.8	0.4578	0.552	1	0.796221		148.7	0.1487	0.552	1	0.876064							0.079843
								0.553	464.1	0.4641	0.553	1	0.797571		148.9	0.1489	0.553	0	0.876064							0.0784935
								0.554	466.4	0.4664	0.554	0	0.797571		149.5	0.1495	0.554	0	0.876064							0.0784935
								0.555	467.9	0.4679	0.555	0	0.797571		149.8	0.1498	0.555	0	0.876064							0.0784935
								0.556	473.6	0.4736	0.556	0	0.797571		150.3	0.1503	0.556	0	0.876064							0.0784935
								0.557	473.9	0.4739	0.557	0	0.797571		150.3	0.1503	0.557	0	0.876064							0.0784935
								0.558	481.8	0.4818	0.558	1	0.79892		150.9	0.1509	0.558	1	0.87701							0.07809
								0.559	485.6	0.4856	0.559	0	0.79892		151.1	0.1511	0.559	2	0.878903							0.0799822
								0.56	486.9	0.4869	0.56	0	0.79892		151.4	0.1514	0.56	0	0.878903							0.0799822
								0.561	495.8	0.4958	0.561	0	0.79892		151.4	0.1514	0.561	0	0.878903							0.0799822
								0.562	496.2	0.4962	0.562	1	0.80027		151.5	0.1515	0.562	0	0.878903							0.0786326
								0.563	502.2	0.5022	0.563	0	0.80027		153.1	0.1531	0.563	0	0.878903							0.0786326
								0.564	504.8	0.5048	0.564	0	0.80027		153.4	0.1534	0.564	1	0.879849							0.0795787
								0.565	507.8	0.5078	0.565	0	0.80027		154.7	0.1547	0.565	0	0.879849							0.0795787
								0.566	508.4	0.5084	0.566	0	0.80027		155.7	0.1557	0.566	0	0.879849							0.0795787
								0.567	508.5	0.5085	0.567	0	0.80027		156.1	0.1561	0.567	0	0.879849							0.0795787
								0.568	512.7	0.5127	0.568	0	0.80027		156.1	0.1561	0.568	0	0.879849							0.0795787
								0.569	513	0.513	0.569	0	0.80027		156.3	0.1563	0.569	0	0.879849							0.0795787
								0.57	514.1	0.5141	0.57	0	0.80027		158.8	0.1588	0.57	0	0.879849							0.0795787
								0.571	515.5	0.5155	0.571	0	0.80027		158.9	0.1589	0.571	0	0.879849							0.0795787
								0.572	516.7	0.5167	0.572	0	0.80027		158.9	0.1589	0.572	1	0.880795							0.0805248
								0.573	517.7	0.5177	0.573	0	0.80027		159	0.159	0.573	0	0.880795							0.0805248
								0.574	518.6	0.5186	0.574	0	0.80027		160	0.16	0.574	1	0.881741							0.0814709
								0.575	522.1	0.5221	0.575	1	0.801619		160.2	0.1602	0.575	0	0.881741							0.0801213
								0.576	522.8	0.5228	0.576	0	0.801619		160.8	0.1608	0.576	0	0.881741							0.0801213
								0.577	526.2	0.5262	0.577	0	0.801619		161	0.161	0.577	0	0.881741							0.0801213
								0.578	526.3	0.5263	0.578	0	0.801619		162.6	0.1626	0.578	0	0.881741							0.0801213
								0.579	531	0.531	0.579	0	0.801619		162.7	0.1627	0.579	0	0.881741							0.0801213
								0.58	534.4	0.5344	0.58	0	0.801619		162.8	0.1628	0.58	0	0.881741							0.0801213
								0.581	535.2	0.5352	0.581	0	0.801619		163.2	0.1632	0.581	0	0.881741							0.0801213
								0.582	535.6	0.5356	0.582	0	0.801619		163.3	0.1633	0.582	0	0.881741							0.0801213
								0.583	536.3	0.5363	0.583	0	0.801619		163.4	0.1634	0.583	0	0.881741							0.0801213
								0.584	537	0.537	0.584	1	0.802969		164	0.164	0.584	0	0.881741							0.0787718
								0.585	538.4	0.5384	0.585	1	0.804318		164.1	0.1641	0.585	0	0.881741							0.0774223
								0.586	539.6	0.5396	0.586	1	0.805668		164.3	0.1643	0.586	1	0.882687							0.0770188
								0.587	548.8	0.5488	0.587	1	0.807018		165.4	0.1654	0.587	0	0.882687							0.0756693
								0.588	548.9	0.5489	0.588	0	0.807018		166.6	0.1666	0.588	0	0.882687							0.0756693
								0.589	550.7	0.5507	0.589	0	0.807018		167.8	0.1678	0.589	0	0.882687							0.0756693
								0.59	551.9	0.5519	0.59	0	0.807018		168.7	0.1687	0.59	0	0.882687							0.0756693
								0.591	552.8	0.5528	0.591	0	0.807018		168.7	0.1687	0.591	0	0.882687							0.0756693
								0.592	557.5	0.5575	0.592	1	0.808367		169	0.169	0.592	1	0.883633							0.0752659
								0.593	561.5	0.5615	0.593	1	0.809717		169.1	0.1691	0.593	1	0.884579							0.0748624
								0.594	575	0.575	0.594	1	0.811066		169.5	0.1695	0.594	0	0.884579							0.0735129
								0.595	583.9	0.5839	0.595	0	0.811066		170.4	0.1704	0.595	0	0.884579							0.0735129
								0.596	584.2	0.5842	0.596	0	0.811066		171.7	0.1717	0.596	0	0.884579							0.0735129
								0.597	585.3	0.5853	0.597	0	0.811066		171.8	0.1718	0.597	1	0.885525							0.0744589
								0.598	587	0.587	0.598	0	0.811066		172.3	0.1723	0.598	0	0.885525							0.0744589
								0.599	591.4	0.5914	0.599	0	0.811066		173.1	0.1731	0.599	3	0.888363							0.0772972
								0.6	592.8	0.5928	0.6	0	0.811066		173.1	0.1731	0.6	0	0.888363							0.0772972
								0.601	593.4	0.5934	0.601	0	0.811066		174	0.174	0.601	0	0.888363							0.0772972
								0.602	603.2	0.6032	0.602	0	0.811066		174.1	0.1741	0.602	0	0.888363							0.0772972
								0.603	604.6	0.6046	0.603	0	0.811066		175.9	0.1759	0.603	0	0.888363							0.0772972
								0.604	606.8	0.6068	0.604	1	0.812416		177	0.177	0.604	1	0.889309							0.0768937
								0.605	609.2	0.6092	0.605	1	0.813765		177.4	0.1774	0.605	0	0.889309							0.0755442
								0.606	612.8	0.6128	0.606	0	0.813765		177.5	0.1775	0.606	0	0.889309							0.0755442
								0.607	618.3	0.6183	0.607	1	0.815115		178	0.178	0.607	0	0.889309							0.0741947
								0.608	621.1	0.6211	0.608	0	0.815115		178.7	0.1787	0.608	0	0.889309							0.0741947
								0.609	624.2	0.6242	0.609	0	0.815115		178.9	0.1789	0.609	1	0.890255							0.0751407
								0.61	630.8	0.6308	0.61	1	0.816464		180.1	0.1801	0.61	0	0.890255							0.0737912
								0.611	632.2	0.6322	0.611	0	0.816464		180.3	0.1803	0.611	0	0.890255							0.0737912
								0.612	633.4	0.6334	0.612	0	0.816464		180.4	0.1804	0.612	0	0.890255							0.0737912
								0.613	634.5	0.6345	0.613	1	0.817814		181.4	0.1814	0.613	0	0.890255							0.0724417
								0.614	647.5	0.6475	0.614	0	0.817814		182.2	0.1822	0.614	0	0.890255							0.0724417
								0.615	648.7	0.6487	0.615	0	0.817814		182.7	0.1827	0.615	0	0.890255							0.0724417
								0.616	654.2	0.6542	0.616	0	0.817814		182.7	0.1827	0.616	1	0.891202							0.0733877
								0.617	655.1	0.6551	0.617	0	0.817814		182.8	0.1828	0.617	0	0.891202							0.0733877
								0.618	656.8	0.6568	0.618	0	0.817814		182.8	0.1828	0.618	0	0.891202							0.0733877
								0.619	658	0.658	0.619	1	0.819163		185.1	0.1851	0.619	0	0.891202							0.0720382
								0.62	660	0.66	0.62	0	0.819163		185.3	0.1853	0.62	1	0.892148							0.0729843
								0.621	670.2	0.6702	0.621	0	0.819163		185.9	0.1859	0.621	0	0.892148							0.0729843
								0.622	672.7	0.6727	0.622	1	0.820513		186.2	0.1862	0.622	0	0.892148							0.0716348
								0.623	674.1	0.6741	0.623	0	0.820513		186.9	0.1869	0.623	1	0.893094							0.0725808
								0.624	676.3	0.6763	0.624	0	0.820513		188.4	0.1884	0.624	0	0.893094							0.0725808
								0.625	676.7	0.6767	0.625	1	0.821862		189.7	0.1897	0.625	2	0.894986							0.0731235
								0.626	678.5	0.6785	0.626	0	0.821862		190.5	0.1905	0.626	0	0.894986							0.0731235
								0.627	680.7	0.6807	0.627	0	0.821862		190.5	0.1905	0.627	1	0.895932							0.0740695
								0.628	682.5	0.6825	0.628	0	0.821862		191.9	0.1919	0.628	0	0.895932							0.0740695
								0.629	685.1	0.6851	0.629	0	0.821862		192.2	0.1922	0.629	1	0.896878							0.0750156
								0.63	691.7	0.6917	0.63	0	0.821862		193.9	0.1939	0.63	0	0.896878							0.0750156
								0.631	691.9	0.6919	0.631	1	0.823212		194.2	0.1942	0.631	0	0.896878							0.0736661
								0.632	692.4	0.6924	0.632	0	0.823212		194.2	0.1942	0.632	0	0.896878							0.0736661
								0.633	696.9	0.6969	0.633	1	0.824561		194.5	0.1945	0.633	1	0.897824							0.0732626
								0.634	697.2	0.6972	0.634	1	0.825911		194.5	0.1945	0.634	1	0.89877							0.0728592
								0.635	704	0.704	0.635	1	0.82726		194.6	0.1946	0.635	1	0.899716							0.0724557
								0.636	705.2	0.7052	0.636	0	0.82726		195.1	0.1951	0.636	0	0.899716							0.0724557
								0.637	708.9	0.7089	0.637	0	0.82726		195.3	0.1953	0.637	1	0.900662							0.0734018
								0.638	716.2	0.7162	0.638	0	0.82726		195.5	0.1955	0.638	0	0.900662							0.0734018
								0.639	716.4	0.7164	0.639	0	0.82726		195.6	0.1956	0.639	0	0.900662							0.0734018
								0.64	717.9	0.7179	0.64	0	0.82726		195.7	0.1957	0.64	0	0.900662							0.0734018
								0.641	720.3	0.7203	0.641	0	0.82726		196.6	0.1966	0.641	0	0.900662							0.0734018
								0.642	724.3	0.7243	0.642	0	0.82726		197	0.197	0.642	1	0.901608							0.0743479
								0.643	728.1	0.7281	0.643	0	0.82726		197.8	0.1978	0.643	0	0.901608							0.0743479
								0.644	729	0.729	0.644	0	0.82726		198.1	0.1981	0.644	0	0.901608							0.0743479
								0.645	733.6	0.7336	0.645	0	0.82726		198.2	0.1982	0.645	0	0.901608							0.0743479
								0.646	740.4	0.7404	0.646	0	0.82726		198.5	0.1985	0.646	0	0.901608							0.0743479
								0.647	743.9	0.7439	0.647	0	0.82726		198.8	0.1988	0.647	0	0.901608							0.0743479
								0.648	748.4	0.7484	0.648	1	0.82861		199.5	0.1995	0.648	0	0.901608							0.0729983
								0.649	750	0.75	0.649	1	0.82996		199.9	0.1999	0.649	0	0.901608							0.0716488
								0.65	757.5	0.7575	0.65	0	0.82996		200	0.2	0.65	0	0.901608							0.0716488
								0.651	760.2	0.7602	0.651	0	0.82996		200.4	0.2004	0.651	1	0.902554							0.0725949
								0.652	764	0.764	0.652	0	0.82996		200.6	0.2006	0.652	0	0.902554							0.0725949
								0.653	764.1	0.7641	0.653	0	0.82996		200.8	0.2008	0.653	0	0.902554							0.0725949
								0.654	780	0.78	0.654	0	0.82996		203.2	0.2032	0.654	0	0.902554							0.0725949
								0.655	781.4	0.7814	0.655	1	0.831309		204.2	0.2042	0.655	0	0.902554							0.0712454
								0.656	796.5	0.7965	0.656	1	0.832659		204.7	0.2047	0.656	0	0.902554							0.0698958
								0.657	808.2	0.8082	0.657	1	0.834008		205.9	0.2059	0.657	0	0.902554							0.0685463
								0.658	812	0.812	0.658	1	0.835358		206.7	0.2067	0.658	0	0.902554							0.0671968
								0.659	812.2	0.8122	0.659	0	0.835358		207.1	0.2071	0.659	0	0.902554							0.0671968
								0.66	813.3	0.8133	0.66	1	0.836707		207.7	0.2077	0.66	0	0.902554							0.0658472
								0.661	820.6	0.8206	0.661	0	0.836707		208.5	0.2085	0.661	1	0.9035							0.0667933
								0.662	821.1	0.8211	0.662	0	0.836707		208.7	0.2087	0.662	0	0.9035							0.0667933
								0.663	823.4	0.8234	0.663	0	0.836707		208.8	0.2088	0.663	0	0.9035							0.0667933
								0.664	826.9	0.8269	0.664	0	0.836707		209.2	0.2092	0.664	0	0.9035							0.0667933
								0.665	830.4	0.8304	0.665	0	0.836707		209.9	0.2099	0.665	0	0.9035							0.0667933
								0.666	830.8	0.8308	0.666	0	0.836707		210	0.21	0.666	0	0.9035							0.0667933
								0.667	832.2	0.8322	0.667	0	0.836707		210.6	0.2106	0.667	2	0.905393							0.0686855
								0.668	842.4	0.8424	0.668	0	0.836707		212	0.212	0.668	0	0.905393							0.0686855
								0.669	844.2	0.8442	0.669	0	0.836707		212.4	0.2124	0.669	0	0.905393							0.0686855
								0.67	845.7	0.8457	0.67	0	0.836707		212.5	0.2125	0.67	0	0.905393							0.0686855
								0.671	854.6	0.8546	0.671	1	0.838057		213	0.213	0.671	0	0.905393							0.0673359
								0.672	854.8	0.8548	0.672	0	0.838057		213.3	0.2133	0.672	0	0.905393							0.0673359
								0.673	858.2	0.8582	0.673	1	0.839406		213.6	0.2136	0.673	0	0.905393							0.0659864
								0.674	867.5	0.8675	0.674	0	0.839406		214.9	0.2149	0.674	0	0.905393							0.0659864
								0.675	870.9	0.8709	0.675	1	0.840756		215.1	0.2151	0.675	1	0.906339							0.065583
								0.676	877.3	0.8773	0.676	0	0.840756		216.5	0.2165	0.676	0	0.906339							0.065583
								0.677	885.4	0.8854	0.677	2	0.843455		217.1	0.2171	0.677	0	0.906339							0.0628839
								0.678	886.2	0.8862	0.678	0	0.843455		217.7	0.2177	0.678	2	0.908231							0.0647761
								0.679	890.1	0.8901	0.679	1	0.844804		217.8	0.2178	0.679	1	0.909177							0.0643726
								0.68	898.4	0.8984	0.68	0	0.844804		220	0.22	0.68	0	0.909177							0.0643726
								0.681	901.1	0.9011	0.681	1	0.846154		220.6	0.2206	0.681	1	0.910123							0.0639691
								0.682	924.5	0.9245	0.682	0	0.846154		220.8	0.2208	0.682	0	0.910123							0.0639691
								0.683	943.1	0.9431	0.683	1	0.847503		220.8	0.2208	0.683	0	0.910123							0.0626196
								0.684	955.9	0.9559	0.684	0	0.847503		221	0.221	0.684	0	0.910123							0.0626196
								0.685	956.3	0.9563	0.685	0	0.847503		221.6	0.2216	0.685	0	0.910123							0.0626196
								0.686	986.5	0.9865	0.686	1	0.848853		222	0.222	0.686	0	0.910123							0.0612701
								0.687	1005.3	1.0053	0.687	0	0.848853		223.2	0.2232	0.687	1	0.911069							0.0622162
								0.688	1027.3	1.0273	0.688	0	0.848853		223.7	0.2237	0.688	0	0.911069							0.0622162
								0.689	1028.7	1.0287	0.689	0	0.848853		224.1	0.2241	0.689	1	0.912015							0.0631622
								0.69	1035.9	1.0359	0.69	0	0.848853		224.4	0.2244	0.69	0	0.912015							0.0631622
								0.691	1037.1	1.0371	0.691	0	0.848853		227.1	0.2271	0.691	0	0.912015							0.0631622
								0.692	1044.5	1.0445	0.692	2	0.851552		228	0.228	0.692	0	0.912015							0.0604632
								0.693	1046.5	1.0465	0.693	1	0.852901		228	0.228	0.693	0	0.912015							0.0591137
								0.694	1071.4	1.0714	0.694	0	0.852901		228.4	0.2284	0.694	3	0.914853							0.0619519
								0.695	1093.1	1.0931	0.695	0	0.852901		229.1	0.2291	0.695	0	0.914853							0.0619519
								0.696	1101.3	1.1013	0.696	0	0.852901		230.8	0.2308	0.696	0	0.914853							0.0619519
								0.697	1115.4	1.1154	0.697	1	0.854251		231	0.231	0.697	0	0.914853							0.0606023
								0.698	1197.6	1.1976	0.698	1	0.855601		231.4	0.2314	0.698	0	0.914853							0.0592528
								0.699	1204.2	1.2042	0.699	0	0.855601		232.1	0.2321	0.699	1	0.915799							0.0601989
								0.7	1210.3	1.2103	0.7	0	0.855601		232.2	0.2322	0.7	0	0.915799							0.0601989
								0.701	1217.7	1.2177	0.701	0	0.855601		232.4	0.2324	0.701	0	0.915799							0.0601989
								0.702	1241.2	1.2412	0.702	0	0.855601		232.6	0.2326	0.702	1	0.916746							0.061145
								0.703	1260.8	1.2608	0.703	0	0.855601		232.7	0.2327	0.703	0	0.916746							0.061145
								0.704	1266.8	1.2668	0.704	1	0.85695		233.7	0.2337	0.704	2	0.918638							0.0616876
								0.705	1321.4	1.3214	0.705	0	0.85695		234.4	0.2344	0.705	0	0.918638							0.0616876
								0.706	1338.3	1.3383	0.706	1	0.8583		234.8	0.2348	0.706	0	0.918638							0.0603381
								0.707	1352	1.352	0.707	0	0.8583		235.3	0.2353	0.707	0	0.918638							0.0603381
								0.708	1358.5	1.3585	0.708	0	0.8583		235.9	0.2359	0.708	0	0.918638							0.0603381
								0.709	1405	1.405	0.709	1	0.859649		237.6	0.2376	0.709	0	0.918638							0.0589885
								0.71	1433.6	1.4336	0.71	0	0.859649		241.3	0.2413	0.71	0	0.918638							0.0589885
								0.711	1444.3	1.4443	0.711	0	0.859649		241.4	0.2414	0.711	0	0.918638							0.0589885
								0.712	1444.4	1.4444	0.712	0	0.859649		241.7	0.2417	0.712	0	0.918638							0.0589885
								0.713	1493.4	1.4934	0.713	0	0.859649		243.2	0.2432	0.713	0	0.918638							0.0589885
								0.714	1565.3	1.5653	0.714	0	0.859649		243.9	0.2439	0.714	0	0.918638							0.0589885
								0.715	1576.3	1.5763	0.715	0	0.859649		245.1	0.2451	0.715	0	0.918638							0.0589885
								0.716	1594	1.594	0.716	0	0.859649		247.1	0.2471	0.716	0	0.918638							0.0589885
								0.717	1717.1	1.7171	0.717	2	0.862348		247.9	0.2479	0.717	0	0.918638							0.0562895
								0.718	1733.6	1.7336	0.718	1	0.863698		248.8	0.2488	0.718	0	0.918638							0.0549399
								0.719	1754.7	1.7547	0.719	0	0.863698		248.9	0.2489	0.719	0	0.918638							0.0549399
								0.72	1772.2	1.7722	0.72	0	0.863698		249.2	0.2492	0.72	0	0.918638							0.0549399
								0.721	1780.5	1.7805	0.721	1	0.865047		249.3	0.2493	0.721	0	0.918638							0.0535904
								0.722	1780.9	1.7809	0.722	0	0.865047		249.9	0.2499	0.722	1	0.919584							0.0545365
								0.723	1871.4	1.8714	0.723	0	0.865047		250	0.25	0.723	1	0.92053							0.0554826
								0.724	1888.1	1.8881	0.724	0	0.865047		250.3	0.2503	0.724	0	0.92053							0.0554826
								0.725	1940	1.94	0.725	1	0.866397		250.3	0.2503	0.725	0	0.92053							0.054133
								0.726	2025.8	2.0258	0.726	0	0.866397		252.9	0.2529	0.726	1	0.921476							0.0550791
								0.727	2029.4	2.0294	0.727	0	0.866397		253.4	0.2534	0.727	0	0.921476							0.0550791
								0.728	2059.1	2.0591	0.728	0	0.866397		254.5	0.2545	0.728	0	0.921476							0.0550791
								0.729	2066.1	2.0661	0.729	2	0.869096		255.7	0.2557	0.729	1	0.922422							0.0533261
								0.73	2104.3	2.1043	0.73	0	0.869096		256	0.256	0.73	0	0.922422							0.0533261
								0.731	2112.5	2.1125	0.731	0	0.869096		261.4	0.2614	0.731	0	0.922422							0.0533261
								0.732	2203.7	2.2037	0.732	0	0.869096		263.2	0.2632	0.732	0	0.922422							0.0533261
								0.733	2332.4	2.3324	0.733	0	0.869096		263.3	0.2633	0.733	1	0.923368							0.0542722
								0.734	2356.6	2.3566	0.734	1	0.870445		264	0.264	0.734	0	0.923368							0.0529227
								0.735	2429.1	2.4291	0.735	0	0.870445		265.4	0.2654	0.735	1	0.924314							0.0538688
								0.736	2493	2.493	0.736	0	0.870445		266.2	0.2662	0.736	0	0.924314							0.0538688
								0.737	2862.7	2.8627	0.737	0	0.870445		266.7	0.2667	0.737	0	0.924314							0.0538688
								0.738	2986.9	2.9869	0.738	0	0.870445		267.9	0.2679	0.738	0	0.924314							0.0538688
								0.739	3025.3	3.0253	0.739	0	0.870445		268.1	0.2681	0.739	0	0.924314							0.0538688
								0.74	3380.8	3.3808	0.74	0	0.870445		268.5	0.2685	0.74	0	0.924314							0.0538688
								0.741	5767.4	5.7674	0.741	1	0.871795		270	0.27	0.741	0	0.924314							0.0525192
								0.742			0.742	0	0.871795		270.3	0.2703	0.742	1	0.92526							0.0534653
								0.743			0.743	0	0.871795		270.4	0.2704	0.743	0	0.92526							0.0534653
								0.744			0.744	1	0.873144		271.3	0.2713	0.744	0	0.92526							0.0521158
								0.745			0.745	0	0.873144		271.4	0.2714	0.745	0	0.92526							0.0521158
								0.746			0.746	0	0.873144		271.9	0.2719	0.746	0	0.92526							0.0521158
								0.747			0.747	0	0.873144		274.3	0.2743	0.747	0	0.92526							0.0521158
								0.748			0.748	0	0.873144		274.4	0.2744	0.748	0	0.92526							0.0521158
								0.749			0.749	1	0.874494		275	0.275	0.749	1	0.926206							0.0517123
								0.75			0.75	1	0.875843		276	0.276	0.75	0	0.926206							0.0503628
								0.751			0.751	0	0.875843		276.3	0.2763	0.751	0	0.926206							0.0503628
								0.752			0.752	0	0.875843		277	0.277	0.752	0	0.926206							0.0503628
								0.753			0.753	0	0.875843		277	0.277	0.753	0	0.926206							0.0503628
								0.754			0.754	0	0.875843		277.2	0.2772	0.754	0	0.926206							0.0503628
								0.755			0.755	0	0.875843		277.7	0.2777	0.755	0	0.926206							0.0503628
								0.756			0.756	0	0.875843		277.8	0.2778	0.756	0	0.926206							0.0503628
								0.757			0.757	0	0.875843		278	0.278	0.757	0	0.926206							0.0503628
								0.758			0.758	1	0.877193		281.1	0.2811	0.758	0	0.926206							0.0490133
								0.759			0.759	0	0.877193		281.9	0.2819	0.759	0	0.926206							0.0490133
								0.76			0.76	0	0.877193		286.9	0.2869	0.76	0	0.926206							0.0490133
								0.761			0.761	1	0.878543		287.2	0.2872	0.761	0	0.926206							0.0476637
								0.762			0.762	0	0.878543		288.9	0.2889	0.762	0	0.926206							0.0476637
								0.763			0.763	0	0.878543		289.5	0.2895	0.763	0	0.926206							0.0476637
								0.764			0.764	1	0.879892		290.3	0.2903	0.764	0	0.926206							0.0463142
								0.765			0.765	1	0.881242		291.1	0.2911	0.765	0	0.926206							0.0449647
								0.766			0.766	0	0.881242		292	0.292	0.766	0	0.926206							0.0449647
								0.767			0.767	0	0.881242		292.2	0.2922	0.767	0	0.926206							0.0449647
								0.768			0.768	0	0.881242		292.5	0.2925	0.768	1	0.927152							0.0459108
								0.769			0.769	0	0.881242		292.8	0.2928	0.769	0	0.927152							0.0459108
								0.77			0.77	0	0.881242		294	0.294	0.77	0	0.927152							0.0459108
								0.771			0.771	0	0.881242		294.8	0.2948	0.771	0	0.927152							0.0459108
								0.772			0.772	0	0.881242		295	0.295	0.772	0	0.927152							0.0459108
								0.773			0.773	0	0.881242		296.5	0.2965	0.773	0	0.927152							0.0459108
								0.774			0.774	0	0.881242		298.2	0.2982	0.774	0	0.927152							0.0459108
								0.775			0.775	0	0.881242		299.2	0.2992	0.775	0	0.927152							0.0459108
								0.776			0.776	0	0.881242		300.3	0.3003	0.776	0	0.927152							0.0459108
								0.777			0.777	0	0.881242		301.4	0.3014	0.777	0	0.927152							0.0459108
								0.778			0.778	0	0.881242		302.5	0.3025	0.778	0	0.927152							0.0459108
								0.779			0.779	0	0.881242		302.5	0.3025	0.779	0	0.927152							0.0459108
								0.78			0.78	1	0.882591		305.6	0.3056	0.78	0	0.927152							0.0445612
								0.781			0.781	0	0.882591		307.5	0.3075	0.781	0	0.927152							0.0445612
								0.782			0.782	1	0.883941		307.7	0.3077	0.782	0	0.927152							0.0432117
								0.783			0.783	0	0.883941		308.7	0.3087	0.783	0	0.927152							0.0432117
								0.784			0.784	0	0.883941		309	0.309	0.784	0	0.927152							0.0432117
								0.785			0.785	0	0.883941		309.6	0.3096	0.785	0	0.927152							0.0432117
								0.786			0.786	0	0.883941		310.2	0.3102	0.786	0	0.927152							0.0432117
								0.787			0.787	0	0.883941		311.2	0.3112	0.787	1	0.928098							0.0441578
								0.788			0.788	0	0.883941		311.3	0.3113	0.788	0	0.928098							0.0441578
								0.789			0.789	0	0.883941		311.4	0.3114	0.789	0	0.928098							0.0441578
								0.79			0.79	0	0.883941		312.5	0.3125	0.79	0	0.928098							0.0441578
								0.791			0.791	0	0.883941		313.8	0.3138	0.791	0	0.928098							0.0441578
								0.792			0.792	0	0.883941		315.5	0.3155	0.792	0	0.928098							0.0441578
								0.793			0.793	0	0.883941		317.4	0.3174	0.793	0	0.928098							0.0441578
								0.794			0.794	0	0.883941		317.4	0.3174	0.794	0	0.928098							0.0441578
								0.795			0.795	0	0.883941		318.5	0.3185	0.795	0	0.928098							0.0441578
								0.796			0.796	0	0.883941		320.1	0.3201	0.796	0	0.928098							0.0441578
								0.797			0.797	1	0.88529		320.1	0.3201	0.797	0	0.928098							0.0428082
								0.798			0.798	0	0.88529		320.9	0.3209	0.798	0	0.928098							0.0428082
								0.799			0.799	0	0.88529		321.6	0.3216	0.799	1	0.929044							0.0437543
								0.8			0.8	0	0.88529		322.5	0.3225	0.8	0	0.929044							0.0437543
								0.801			0.801	0	0.88529		323.8	0.3238	0.801	0	0.929044							0.0437543
								0.802			0.802	0	0.88529		326.7	0.3267	0.802	0	0.929044							0.0437543
								0.803			0.803	0	0.88529		328.9	0.3289	0.803	0	0.929044							0.0437543
								0.804			0.804	0	0.88529		330	0.33	0.804	0	0.929044							0.0437543
								0.805			0.805	0	0.88529		330.2	0.3302	0.805	0	0.929044							0.0437543
								0.806			0.806	0	0.88529		331.2	0.3312	0.806	1	0.929991							0.0447004
								0.807			0.807	0	0.88529		331.4	0.3314	0.807	1	0.930937							0.0456465
								0.808			0.808	0	0.88529		332.3	0.3323	0.808	1	0.931883							0.0465925
								0.809			0.809	1	0.88664		333.4	0.3334	0.809	0	0.931883							0.045243
								0.81			0.81	0	0.88664		334.5	0.3345	0.81	0	0.931883							0.045243
								0.811			0.811	0	0.88664		336.2	0.3362	0.811	0	0.931883							0.045243
								0.812			0.812	1	0.887989		336.2	0.3362	0.812	0	0.931883							0.0438935
								0.813			0.813	1	0.889339		336.6	0.3366	0.813	0	0.931883							0.042544
								0.814			0.814	1	0.890688		336.8	0.3368	0.814	0	0.931883							0.0411944
								0.815			0.815	0	0.890688		339.8	0.3398	0.815	0	0.931883							0.0411944
								0.816			0.816	0	0.890688		345.1	0.3451	0.816	0	0.931883							0.0411944
								0.817			0.817	0	0.890688		345.9	0.3459	0.817	0	0.931883							0.0411944
								0.818			0.818	0	0.890688		347.4	0.3474	0.818	1	0.932829							0.0421405
								0.819			0.819	0	0.890688		349.7	0.3497	0.819	0	0.932829							0.0421405
								0.82			0.82	0	0.890688		355.4	0.3554	0.82	0	0.932829							0.0421405
								0.821			0.821	1	0.892038		356.7	0.3567	0.821	0	0.932829							0.040791
								0.822			0.822	1	0.893387		360.5	0.3605	0.822	0	0.932829							0.0394414
								0.823			0.823	0	0.893387		362.9	0.3629	0.823	1	0.933775							0.0403875
								0.824			0.824	1	0.894737		364.8	0.3648	0.824	0	0.933775							0.039038
								0.825			0.825	0	0.894737		365.3	0.3653	0.825	0	0.933775							0.039038
								0.826			0.826	0	0.894737		367.5	0.3675	0.826	1	0.934721							0.0399841
								0.827			0.827	1	0.896086		368.1	0.3681	0.827	0	0.934721							0.0386345
								0.828			0.828	0	0.896086		369	0.369	0.828	1	0.935667							0.0395806
								0.829			0.829	0	0.896086		369.9	0.3699	0.829	0	0.935667							0.0395806
								0.83			0.83	0	0.896086		370.3	0.3703	0.83	1	0.936613							0.0405267
								0.831			0.831	2	0.898785		373	0.373	0.831	0	0.936613							0.0378276
								0.832			0.832	0	0.898785		376.6	0.3766	0.832	0	0.936613							0.0378276
								0.833			0.833	1	0.900135		385	0.385	0.833	0	0.936613							0.0364781
								0.834			0.834	0	0.900135		385.6	0.3856	0.834	0	0.936613							0.0364781
								0.835			0.835	0	0.900135		386.1	0.3861	0.835	0	0.936613							0.0364781
								0.836			0.836	0	0.900135		386.2	0.3862	0.836	0	0.936613							0.0364781
								0.837			0.837	0	0.900135		386.3	0.3863	0.837	0	0.936613							0.0364781
								0.838			0.838	0	0.900135		387.1	0.3871	0.838	0	0.936613							0.0364781
								0.839			0.839	0	0.900135		389.4	0.3894	0.839	0	0.936613							0.0364781
								0.84			0.84	0	0.900135		390.4	0.3904	0.84	0	0.936613							0.0364781
								0.841			0.841	0	0.900135		391.3	0.3913	0.841	0	0.936613							0.0364781
								0.842			0.842	0	0.900135		391.8	0.3918	0.842	1	0.937559							0.0374242
								0.843			0.843	1	0.901484		392	0.392	0.843	0	0.937559							0.0360746
								0.844			0.844	0	0.901484		392.7	0.3927	0.844	0	0.937559							0.0360746
								0.845			0.845	1	0.902834		393.5	0.3935	0.845	0	0.937559							0.0347251
								0.846			0.846	1	0.904184		394	0.394	0.846	1	0.938505							0.0343217
								0.847			0.847	0	0.904184		395.5	0.3955	0.847	0	0.938505							0.0343217
								0.848			0.848	0	0.904184		396.1	0.3961	0.848	0	0.938505							0.0343217
								0.849			0.849	0	0.904184		398	0.398	0.849	0	0.938505							0.0343217
								0.85			0.85	0	0.904184		398.5	0.3985	0.85	1	0.939451							0.0352677
								0.851			0.851	0	0.904184		398.5	0.3985	0.851	0	0.939451							0.0352677
								0.852			0.852	0	0.904184		400.1	0.4001	0.852	0	0.939451							0.0352677
								0.853			0.853	0	0.904184		402.2	0.4022	0.853	0	0.939451							0.0352677
								0.854			0.854	0	0.904184		402.3	0.4023	0.854	0	0.939451							0.0352677
								0.855			0.855	2	0.906883		402.8	0.4028	0.855	0	0.939451							0.0325687
								0.856			0.856	0	0.906883		405.1	0.4051	0.856	0	0.939451							0.0325687
								0.857			0.857	0	0.906883		405.6	0.4056	0.857	0	0.939451							0.0325687
								0.858			0.858	0	0.906883		406.5	0.4065	0.858	0	0.939451							0.0325687
								0.859			0.859	1	0.908232		406.7	0.4067	0.859	0	0.939451							0.0312192
								0.86			0.86	0	0.908232		407.5	0.4075	0.86	0	0.939451							0.0312192
								0.861			0.861	0	0.908232		407.5	0.4075	0.861	0	0.939451							0.0312192
								0.862			0.862	0	0.908232		410.7	0.4107	0.862	0	0.939451							0.0312192
								0.863			0.863	0	0.908232		414.9	0.4149	0.863	0	0.939451							0.0312192
								0.864			0.864	0	0.908232		417.8	0.4178	0.864	0	0.939451							0.0312192
								0.865			0.865	0	0.908232		418.1	0.4181	0.865	0	0.939451							0.0312192
								0.866			0.866	0	0.908232		423.2	0.4232	0.866	0	0.939451							0.0312192
								0.867			0.867	0	0.908232		426.2	0.4262	0.867	1	0.940397							0.0321652
								0.868			0.868	1	0.909582		429.9	0.4299	0.868	0	0.940397							0.0308157
								0.869			0.869	0	0.909582		430.7	0.4307	0.869	0	0.940397							0.0308157
								0.87			0.87	0	0.909582		432	0.432	0.87	0	0.940397							0.0308157
								0.871			0.871	1	0.910931		432.7	0.4327	0.871	0	0.940397							0.0294662
								0.872			0.872	0	0.910931		437.1	0.4371	0.872	0	0.940397							0.0294662
								0.873			0.873	0	0.910931		437.2	0.4372	0.873	0	0.940397							0.0294662
								0.874			0.874	0	0.910931		439.2	0.4392	0.874	0	0.940397							0.0294662
								0.875			0.875	0	0.910931		439.7	0.4397	0.875	0	0.940397							0.0294662
								0.876			0.876	0	0.910931		440.3	0.4403	0.876	0	0.940397							0.0294662
								0.877			0.877	0	0.910931		440.8	0.4408	0.877	0	0.940397							0.0294662
								0.878			0.878	1	0.912281		447.1	0.4471	0.878	0	0.940397							0.0281166
								0.879			0.879	0	0.912281		447.2	0.4472	0.879	0	0.940397							0.0281166
								0.88			0.88	0	0.912281		448.4	0.4484	0.88	0	0.940397							0.0281166
								0.881			0.881	0	0.912281		450.4	0.4504	0.881	0	0.940397							0.0281166
								0.882			0.882	0	0.912281		451.3	0.4513	0.882	1	0.941343							0.0290627
								0.883			0.883	0	0.912281		454.3	0.4543	0.883	1	0.942289							0.0300088
								0.884			0.884	0	0.912281		458.7	0.4587	0.884	0	0.942289							0.0300088
								0.885			0.885	0	0.912281		459	0.459	0.885	0	0.942289							0.0300088
								0.886			0.886	1	0.91363		459.4	0.4594	0.886	0	0.942289							0.0286593
								0.887			0.887	1	0.91498		460.6	0.4606	0.887	1	0.943236							0.0282558
								0.888			0.888	0	0.91498		461.4	0.4614	0.888	0	0.943236							0.0282558
								0.889			0.889	0	0.91498		464.9	0.4649	0.889	0	0.943236							0.0282558
								0.89			0.89	0	0.91498		465.5	0.4655	0.89	1	0.944182							0.0292019
								0.891			0.891	1	0.916329		467.3	0.4673	0.891	0	0.944182							0.0278524
								0.892			0.892	0	0.916329		467.5	0.4675	0.892	0	0.944182							0.0278524
								0.893			0.893	0	0.916329		467.9	0.4679	0.893	0	0.944182							0.0278524
								0.894			0.894	0	0.916329		469.5	0.4695	0.894	1	0.945128							0.0287984
								0.895			0.895	0	0.916329		469.9	0.4699	0.895	0	0.945128							0.0287984
								0.896			0.896	0	0.916329		472	0.472	0.896	0	0.945128							0.0287984
								0.897			0.897	0	0.916329		472.4	0.4724	0.897	0	0.945128							0.0287984
								0.898			0.898	0	0.916329		478.1	0.4781	0.898	0	0.945128							0.0287984
								0.899			0.899	1	0.917679		483.7	0.4837	0.899	0	0.945128							0.0274489
								0.9			0.9	0	0.917679		484.4	0.4844	0.9	0	0.945128							0.0274489
								0.901			0.901	0	0.917679		486.8	0.4868	0.901	0	0.945128							0.0274489
								0.902			0.902	1	0.919028		487.2	0.4872	0.902	0	0.945128							0.0260994
								0.903			0.903	0	0.919028		492.9	0.4929	0.903	0	0.945128							0.0260994
								0.904			0.904	0	0.919028		494.2	0.4942	0.904	2	0.94702							0.0279915
								0.905			0.905	0	0.919028		495.8	0.4958	0.905	0	0.94702							0.0279915
								0.906			0.906	0	0.919028		496.7	0.4967	0.906	0	0.94702							0.0279915
								0.907			0.907	0	0.919028		499.5	0.4995	0.907	0	0.94702							0.0279915
								0.908			0.908	0	0.919028		500.3	0.5003	0.908	0	0.94702							0.0279915
								0.909			0.909	0	0.919028		500.9	0.5009	0.909	0	0.94702							0.0279915
								0.91			0.91	0	0.919028		501.5	0.5015	0.91	0	0.94702							0.0279915
								0.911			0.911	0	0.919028		502.6	0.5026	0.911	0	0.94702							0.0279915
								0.912			0.912	0	0.919028		503.7	0.5037	0.912	0	0.94702							0.0279915
								0.913			0.913	0	0.919028		508.6	0.5086	0.913	0	0.94702							0.0279915
								0.914			0.914	0	0.919028		509.5	0.5095	0.914	0	0.94702							0.0279915
								0.915			0.915	0	0.919028		516	0.516	0.915	0	0.94702							0.0279915
								0.916			0.916	0	0.919028		516.3	0.5163	0.916	0	0.94702							0.0279915
								0.917			0.917	0	0.919028		519.8	0.5198	0.917	0	0.94702							0.0279915
								0.918			0.918	0	0.919028		523.9	0.5239	0.918	0	0.94702							0.0279915
								0.919			0.919	0	0.919028		529.4	0.5294	0.919	0	0.94702							0.0279915
								0.92			0.92	0	0.919028		534.1	0.5341	0.92	0	0.94702							0.0279915
								0.921			0.921	0	0.919028		539.3	0.5393	0.921	0	0.94702							0.0279915
								0.922			0.922	0	0.919028		540.7	0.5407	0.922	0	0.94702							0.0279915
								0.923			0.923	0	0.919028		541.8	0.5418	0.923	0	0.94702							0.0279915
								0.924			0.924	0	0.919028		542	0.542	0.924	1	0.947966							0.0289376
								0.925			0.925	1	0.920378		544.4	0.5444	0.925	0	0.947966							0.0275881
								0.926			0.926	0	0.920378		551.7	0.5517	0.926	0	0.947966							0.0275881
								0.927			0.927	0	0.920378		557.2	0.5572	0.927	0	0.947966							0.0275881
								0.928			0.928	0	0.920378		558.5	0.5585	0.928	0	0.947966							0.0275881
								0.929			0.929	0	0.920378		558.9	0.5589	0.929	0	0.947966							0.0275881
								0.93			0.93	0	0.920378		564	0.564	0.93	0	0.947966							0.0275881
								0.931			0.931	0	0.920378		571.1	0.5711	0.931	0	0.947966							0.0275881
								0.932			0.932	0	0.920378		573.5	0.5735	0.932	0	0.947966							0.0275881
								0.933			0.933	0	0.920378		585.8	0.5858	0.933	0	0.947966							0.0275881
								0.934			0.934	0	0.920378		591.1	0.5911	0.934	1	0.948912							0.0285341
								0.935			0.935	0	0.920378		592.7	0.5927	0.935	0	0.948912							0.0285341
								0.936			0.936	0	0.920378		596.7	0.5967	0.936	0	0.948912							0.0285341
								0.937			0.937	0	0.920378		598.1	0.5981	0.937	0	0.948912							0.0285341
								0.938			0.938	0	0.920378		598.3	0.5983	0.938	0	0.948912							0.0285341
								0.939			0.939	0	0.920378		598.9	0.5989	0.939	0	0.948912							0.0285341
								0.94			0.94	0	0.920378		603.9	0.6039	0.94	0	0.948912							0.0285341
								0.941			0.941	0	0.920378		608.6	0.6086	0.941	0	0.948912							0.0285341
								0.942			0.942	0	0.920378		615.5	0.6155	0.942	0	0.948912							0.0285341
								0.943			0.943	0	0.920378		619.1	0.6191	0.943	0	0.948912							0.0285341
								0.944			0.944	1	0.921727		623	0.623	0.944	0	0.948912							0.0271846
								0.945			0.945	0	0.921727		624.2	0.6242	0.945	0	0.948912							0.0271846
								0.946			0.946	0	0.921727		624.5	0.6245	0.946	0	0.948912							0.0271846
								0.947			0.947	0	0.921727		626.8	0.6268	0.947	0	0.948912							0.0271846
								0.948			0.948	0	0.921727		628.1	0.6281	0.948	0	0.948912							0.0271846
								0.949			0.949	0	0.921727		632.1	0.6321	0.949	0	0.948912							0.0271846
								0.95			0.95	0	0.921727		633.5	0.6335	0.95	0	0.948912							0.0271846
								0.951			0.951	0	0.921727		634.1	0.6341	0.951	0	0.948912							0.0271846
								0.952			0.952	0	0.921727		636.9	0.6369	0.952	0	0.948912							0.0271846
								0.953			0.953	0	0.921727		641.6	0.6416	0.953	0	0.948912							0.0271846
								0.954			0.954	0	0.921727		651	0.651	0.954	0	0.948912							0.0271846
								0.955			0.955	0	0.921727		661	0.661	0.955	0	0.948912							0.0271846
								0.956			0.956	1	0.923077		666.3	0.6663	0.956	0	0.948912							0.0258351
								0.957			0.957	1	0.924426		666.6	0.6666	0.957	0	0.948912							0.0244856
								0.958			0.958	0	0.924426		674.3	0.6743	0.958	0	0.948912							0.0244856
								0.959			0.959	0	0.924426		677.1	0.6771	0.959	0	0.948912							0.0244856
								0.96			0.96	0	0.924426		678	0.678	0.96	0	0.948912							0.0244856
								0.961			0.961	0	0.924426		678.8	0.6788	0.961	0	0.948912							0.0244856
								0.962			0.962	0	0.924426		680.4	0.6804	0.962	0	0.948912							0.0244856
								0.963			0.963	0	0.924426		686.5	0.6865	0.963	0	0.948912							0.0244856
								0.964			0.964	0	0.924426		688.8	0.6888	0.964	0	0.948912							0.0244856
								0.965			0.965	0	0.924426		693.5	0.6935	0.965	1	0.949858							0.0254316
								0.966			0.966	0	0.924426		693.7	0.6937	0.966	0	0.949858							0.0254316
								0.967			0.967	0	0.924426		693.7	0.6937	0.967	0	0.949858							0.0254316
								0.968			0.968	0	0.924426		698.5	0.6985	0.968	0	0.949858							0.0254316
								0.969			0.969	0	0.924426		701.4	0.7014	0.969	0	0.949858							0.0254316
								0.97			0.97	0	0.924426		703.7	0.7037	0.97	0	0.949858							0.0254316
								0.971			0.971	0	0.924426		704	0.704	0.971	0	0.949858							0.0254316
								0.972			0.972	0	0.924426		721.3	0.7213	0.972	0	0.949858							0.0254316
								0.973			0.973	0	0.924426		723	0.723	0.973	0	0.949858							0.0254316
								0.974			0.974	0	0.924426		725.1	0.7251	0.974	0	0.949858							0.0254316
								0.975			0.975	0	0.924426		729	0.729	0.975	0	0.949858							0.0254316
								0.976			0.976	0	0.924426		732.5	0.7325	0.976	0	0.949858							0.0254316
								0.977			0.977	0	0.924426		734.2	0.7342	0.977	0	0.949858							0.0254316
								0.978			0.978	0	0.924426		741.4	0.7414	0.978	0	0.949858							0.0254316
								0.979			0.979	0	0.924426		749	0.749	0.979	0	0.949858							0.0254316
								0.98			0.98	0	0.924426		767.6	0.7676	0.98	0	0.949858							0.0254316
								0.981			0.981	0	0.924426		787	0.787	0.981	0	0.949858							0.0254316
								0.982			0.982	0	0.924426		798.2	0.7982	0.982	0	0.949858							0.0254316
								0.983			0.983	0	0.924426		805.9	0.8059	0.983	0	0.949858							0.0254316
								0.984			0.984	0	0.924426		806.9	0.8069	0.984	0	0.949858							0.0254316
								0.985			0.985	0	0.924426		807.5	0.8075	0.985	0	0.949858							0.0254316
								0.986			0.986	0	0.924426		817.4	0.8174	0.986	0	0.949858							0.0254316
								0.987			0.987	1	0.925776		822.3	0.8223	0.987	0	0.949858							0.0240821
								0.988			0.988	0	0.925776		825.6	0.8256	0.988	0	0.949858							0.0240821
								0.989			0.989	0	0.925776		827.9	0.8279	0.989	0	0.949858							0.0240821
								0.99			0.99	0	0.925776		830	0.83	0.99	1	0.950804							0.0250282
								0.991			0.991	0	0.925776		841.3	0.8413	0.991	1	0.95175							0.0259743
								0.992			0.992	0	0.925776		845.5	0.8455	0.992	0	0.95175							0.0259743
								0.993			0.993	0	0.925776		849.5	0.8495	0.993	0	0.95175							0.0259743
								0.994			0.994	0	0.925776		866.4	0.8664	0.994	0	0.95175							0.0259743
								0.995			0.995	0	0.925776		881.6	0.8816	0.995	0	0.95175							0.0259743
								0.996			0.996	0	0.925776		882.1	0.8821	0.996	0	0.95175							0.0259743
								0.997			0.997	0	0.925776		886.3	0.8863	0.997	0	0.95175							0.0259743
								0.998			0.998	0	0.925776		889.8	0.8898	0.998	0	0.95175							0.0259743
								0.999			0.999	0	0.925776		893.7	0.8937	0.999	0	0.95175							0.0259743
								1			1	0	0.925776		903.7	0.9037	1	0	0.95175							0.0259743
								1.001			1.001	0	0.925776		904	0.904	1.001	0	0.95175							0.0259743
								1.002			1.002	0	0.925776		923.9	0.9239	1.002	0	0.95175							0.0259743
								1.003			1.003	0	0.925776		933.7	0.9337	1.003	0	0.95175							0.0259743
								1.004			1.004	0	0.925776		964.1	0.9641	1.004	0	0.95175							0.0259743
								1.005			1.005	0	0.925776		989.9	0.9899	1.005	0	0.95175							0.0259743
								1.006			1.006	1	0.927126		990.4	0.9904	1.006	0	0.95175							0.0246247
								1.007			1.007	0	0.927126		1008.2	1.0082	1.007	0	0.95175							0.0246247
								1.008			1.008	0	0.927126		1013	1.013	1.008	0	0.95175							0.0246247
								1.009			1.009	0	0.927126		1020.2	1.0202	1.009	1	0.952696							0.0255708
								1.01			1.01	0	0.927126		1023.2	1.0232	1.01	0	0.952696							0.0255708
								1.011			1.011	0	0.927126		1030.6	1.0306	1.011	0	0.952696							0.0255708
								1.012			1.012	0	0.927126		1037.4	1.0374	1.012	0	0.952696							0.0255708
								1.013			1.013	0	0.927126		1042.9	1.0429	1.013	0	0.952696							0.0255708
								1.014			1.014	0	0.927126		1099.4	1.0994	1.014	1	0.953642							0.0265169
								1.015			1.015	0	0.927126		1116.7	1.1167	1.015	0	0.953642							0.0265169
								1.016			1.016	0	0.927126		1116.9	1.1169	1.016	0	0.953642							0.0265169
								1.017			1.017	0	0.927126		1127.5	1.1275	1.017	0	0.953642							0.0265169
								1.018			1.018	0	0.927126		1141.7	1.1417	1.018	0	0.953642							0.0265169
								1.019			1.019	0	0.927126		1144.8	1.1448	1.019	0	0.953642							0.0265169
								1.02			1.02	0	0.927126		1177	1.177	1.02	0	0.953642							0.0265169
								1.021			1.021	0	0.927126		1178	1.178	1.021	1	0.954588							0.027463
								1.022			1.022	0	0.927126		1186.9	1.1869	1.022	0	0.954588							0.027463
								1.023			1.023	0	0.927126		1189.1	1.1891	1.023	0	0.954588							0.027463
								1.024			1.024	0	0.927126		1276.6	1.2766	1.024	1	0.955535							0.028409
								1.025			1.025	0	0.927126		1284.1	1.2841	1.025	0	0.955535							0.028409
								1.026			1.026	0	0.927126		1311	1.311	1.026	0	0.955535							0.028409
								1.027			1.027	0	0.927126		1313.7	1.3137	1.027	0	0.955535							0.028409
								1.028			1.028	1	0.928475		1319.2	1.3192	1.028	0	0.955535							0.0270595
								1.029			1.029	1	0.929825		1366.1	1.3661	1.029	0	0.955535							0.02571
								1.03			1.03	0	0.929825		1386.5	1.3865	1.03	0	0.955535							0.02571
								1.031			1.031	0	0.929825		1389.8	1.3898	1.031	1	0.956481							0.026656
								1.032			1.032	0	0.929825		1411.8	1.4118	1.032	0	0.956481							0.026656
								1.033			1.033	0	0.929825		1429.3	1.4293	1.033	0	0.956481							0.026656
								1.034			1.034	0	0.929825		1448.4	1.4484	1.034	0	0.956481							0.026656
								1.035			1.035	0	0.929825		1451	1.451	1.035	0	0.956481							0.026656
								1.036			1.036	1	0.931174		1589.6	1.5896	1.036	0	0.956481							0.0253065
								1.037			1.037	0	0.931174		1623.9	1.6239	1.037	0	0.956481							0.0253065
								1.038			1.038	1	0.932524		1625.2	1.6252	1.038	1	0.957427							0.0249031
								1.039			1.039	0	0.932524		1720.4	1.7204	1.039	0	0.957427							0.0249031
								1.04			1.04	0	0.932524		1768.4	1.7684	1.04	0	0.957427							0.0249031
								1.041			1.041	0	0.932524		1791	1.791	1.041	0	0.957427							0.0249031
								1.042			1.042	0	0.932524		1927.6	1.9276	1.042	0	0.957427							0.0249031
								1.043			1.043	0	0.932524		1979	1.979	1.043	1	0.958373							0.0258491
								1.044			1.044	0	0.932524		1994	1.994	1.044	0	0.958373							0.0258491
								1.045			1.045	1	0.933873		2131.2	2.1312	1.045	0	0.958373							0.0244996
								1.046			1.046	0	0.933873		2141.1	2.1411	1.046	0	0.958373							0.0244996
								1.047			1.047	1	0.935223		2180.4	2.1804	1.047	0	0.958373							0.0231501
								1.048			1.048	0	0.935223		2297.7	2.2977	1.048	0	0.958373							0.0231501
								1.049			1.049	0	0.935223		2429.4	2.4294	1.049	0	0.958373							0.0231501
								1.05			1.05	0	0.935223		2539.7	2.5397	1.05	0	0.958373							0.0231501
								1.051			1.051	0	0.935223		2678.4	2.6784	1.051	0	0.958373							0.0231501
								1.052			1.052	0	0.935223		2801.9	2.8019	1.052	0	0.958373							0.0231501
								1.053			1.053	0	0.935223		2846.1	2.8461	1.053	0	0.958373							0.0231501
								1.054			1.054	0	0.935223		3289.4	3.2894	1.054	0	0.958373							0.0231501
								1.055			1.055	0	0.935223		3321.2	3.3212	1.055	0	0.958373							0.0231501
								1.056			1.056	0	0.935223		3428	3.428	1.056	0	0.958373							0.0231501
								1.057			1.057	0	0.935223		3443.1	3.4431	1.057	0	0.958373							0.0231501
								1.058			1.058	0	0.935223				1.058	0	0.958373							0.0231501
								1.059			1.059	0	0.935223				1.059	0	0.958373							0.0231501
								1.06			1.06	0	0.935223				1.06	0	0.958373							0.0231501
								1.061			1.061	0	0.935223				1.061	0	0.958373							0.0231501
								1.062			1.062	0	0.935223				1.062	0	0.958373							0.0231501
								1.063			1.063	0	0.935223				1.063	0	0.958373							0.0231501
								1.064			1.064	0	0.935223				1.064	0	0.958373							0.0231501
								1.065			1.065	0	0.935223				1.065	0	0.958373							0.0231501
								1.066			1.066	0	0.935223				1.066	0	0.958373							0.0231501
								1.067			1.067	0	0.935223				1.067	0	0.958373							0.0231501
								1.068			1.068	0	0.935223				1.068	0	0.958373							0.0231501
								1.069			1.069	0	0.935223				1.069	0	0.958373							0.0231501
								1.07			1.07	0	0.935223				1.07	0	0.958373							0.0231501
								1.071			1.071	0	0.935223				1.071	0	0.958373							0.0231501
								1.072			1.072	1	0.936572				1.072	0	0.958373							0.0218006
								1.073			1.073	0	0.936572				1.073	0	0.958373							0.0218006
								1.074			1.074	0	0.936572				1.074	0	0.958373							0.0218006
								1.075			1.075	0	0.936572				1.075	0	0.958373							0.0218006
								1.076			1.076	0	0.936572				1.076	0	0.958373							0.0218006
								1.077			1.077	0	0.936572				1.077	0	0.958373							0.0218006
								1.078			1.078	0	0.936572				1.078	0	0.958373							0.0218006
								1.079			1.079	0	0.936572				1.079	0	0.958373							0.0218006
								1.08			1.08	0	0.936572				1.08	0	0.958373							0.0218006
								1.081			1.081	0	0.936572				1.081	0	0.958373							0.0218006
								1.082			1.082	0	0.936572				1.082	0	0.958373							0.0218006
								1.083			1.083	0	0.936572				1.083	0	0.958373							0.0218006
								1.084			1.084	0	0.936572				1.084	0	0.958373							0.0218006
								1.085			1.085	0	0.936572				1.085	0	0.958373							0.0218006
								1.086			1.086	0	0.936572				1.086	0	0.958373							0.0218006
								1.087			1.087	0	0.936572				1.087	0	0.958373							0.0218006
								1.088			1.088	0	0.936572				1.088	0	0.958373							0.0218006
								1.089			1.089	0	0.936572				1.089	0	0.958373							0.0218006
								1.09			1.09	0	0.936572				1.09	0	0.958373							0.0218006
								1.091			1.091	0	0.936572				1.091	0	0.958373							0.0218006
								1.092			1.092	0	0.936572				1.092	0	0.958373							0.0218006
								1.093			1.093	0	0.936572				1.093	0	0.958373							0.0218006
								1.094			1.094	1	0.937922				1.094	0	0.958373							0.020451
								1.095			1.095	0	0.937922				1.095	0	0.958373							0.020451
								1.096			1.096	0	0.937922				1.096	0	0.958373							0.020451
								1.097			1.097	0	0.937922				1.097	0	0.958373							0.020451
								1.098			1.098	0	0.937922				1.098	0	0.958373							0.020451
								1.099			1.099	0	0.937922				1.099	0	0.958373							0.020451
								1.1			1.1	0	0.937922				1.1	1	0.959319							0.0213971
								1.101			1.101	0	0.937922				1.101	0	0.959319							0.0213971
								1.102			1.102	1	0.939271				1.102	0	0.959319							0.0200476
								1.103			1.103	0	0.939271				1.103	0	0.959319							0.0200476
								1.104			1.104	0	0.939271				1.104	0	0.959319							0.0200476
								1.105			1.105	0	0.939271				1.105	0	0.959319							0.0200476
								1.106			1.106	0	0.939271				1.106	0	0.959319							0.0200476
								1.107			1.107	0	0.939271				1.107	0	0.959319							0.0200476
								1.108			1.108	0	0.939271				1.108	0	0.959319							0.0200476
								1.109			1.109	0	0.939271				1.109	0	0.959319							0.0200476
								1.11			1.11	0	0.939271				1.11	0	0.959319							0.0200476
								1.111			1.111	0	0.939271				1.111	0	0.959319							0.0200476
								1.112			1.112	0	0.939271				1.112	0	0.959319							0.0200476
								1.113			1.113	0	0.939271				1.113	0	0.959319							0.0200476
								1.114			1.114	0	0.939271				1.114	0	0.959319							0.0200476
								1.115			1.115	0	0.939271				1.115	0	0.959319							0.0200476
								1.116			1.116	1	0.940621				1.116	0	0.959319							0.018698
								1.117			1.117	0	0.940621				1.117	2	0.961211							0.0205902
								1.118			1.118	0	0.940621				1.118	0	0.961211							0.0205902
								1.119			1.119	0	0.940621				1.119	0	0.961211							0.0205902
								1.12			1.12	0	0.940621				1.12	0	0.961211							0.0205902
								1.121			1.121	0	0.940621				1.121	0	0.961211							0.0205902
								1.122			1.122	0	0.940621				1.122	0	0.961211							0.0205902
								1.123			1.123	0	0.940621				1.123	0	0.961211							0.0205902
								1.124			1.124	0	0.940621				1.124	0	0.961211							0.0205902
								1.125			1.125	0	0.940621				1.125	0	0.961211							0.0205902
								1.126			1.126	0	0.940621				1.126	0	0.961211							0.0205902
								1.127			1.127	0	0.940621				1.127	0	0.961211							0.0205902
								1.128			1.128	0	0.940621				1.128	1	0.962157							0.0215363
								1.129			1.129	0	0.940621				1.129	0	0.962157							0.0215363
								1.13			1.13	0	0.940621				1.13	0	0.962157							0.0215363
								1.131			1.131	0	0.940621				1.131	0	0.962157							0.0215363
								1.132			1.132	0	0.940621				1.132	0	0.962157							0.0215363
								1.133			1.133	0	0.940621				1.133	0	0.962157							0.0215363
								1.134			1.134	0	0.940621				1.134	0	0.962157							0.0215363
								1.135			1.135	0	0.940621				1.135	0	0.962157							0.0215363
								1.136			1.136	0	0.940621				1.136	0	0.962157							0.0215363
								1.137			1.137	0	0.940621				1.137	0	0.962157							0.0215363
								1.138			1.138	0	0.940621				1.138	0	0.962157							0.0215363
								1.139			1.139	0	0.940621				1.139	0	0.962157							0.0215363
								1.14			1.14	0	0.940621				1.14	0	0.962157							0.0215363
								1.141			1.141	0	0.940621				1.141	0	0.962157							0.0215363
								1.142			1.142	0	0.940621				1.142	1	0.963103							0.0224823
								1.143			1.143	0	0.940621				1.143	0	0.963103							0.0224823
								1.144			1.144	0	0.940621				1.144	0	0.963103							0.0224823
								1.145			1.145	0	0.940621				1.145	1	0.964049							0.0234284
								1.146			1.146	0	0.940621				1.146	0	0.964049							0.0234284
								1.147			1.147	0	0.940621				1.147	0	0.964049							0.0234284
								1.148			1.148	0	0.940621				1.148	0	0.964049							0.0234284
								1.149			1.149	0	0.940621				1.149	0	0.964049							0.0234284
								1.15			1.15	0	0.940621				1.15	0	0.964049							0.0234284
								1.151			1.151	0	0.940621				1.151	0	0.964049							0.0234284
								1.152			1.152	0	0.940621				1.152	0	0.964049							0.0234284
								1.153			1.153	0	0.940621				1.153	0	0.964049							0.0234284
								1.154			1.154	0	0.940621				1.154	0	0.964049							0.0234284
								1.155			1.155	0	0.940621				1.155	0	0.964049							0.0234284
								1.156			1.156	0	0.940621				1.156	0	0.964049							0.0234284
								1.157			1.157	0	0.940621				1.157	0	0.964049							0.0234284
								1.158			1.158	0	0.940621				1.158	0	0.964049							0.0234284
								1.159			1.159	0	0.940621				1.159	0	0.964049							0.0234284
								1.16			1.16	0	0.940621				1.16	0	0.964049							0.0234284
								1.161			1.161	0	0.940621				1.161	0	0.964049							0.0234284
								1.162			1.162	0	0.940621				1.162	0	0.964049							0.0234284
								1.163			1.163	0	0.940621				1.163	0	0.964049							0.0234284
								1.164			1.164	0	0.940621				1.164	0	0.964049							0.0234284
								1.165			1.165	0	0.940621				1.165	0	0.964049							0.0234284
								1.166			1.166	0	0.940621				1.166	0	0.964049							0.0234284
								1.167			1.167	0	0.940621				1.167	0	0.964049							0.0234284
								1.168			1.168	0	0.940621				1.168	0	0.964049							0.0234284
								1.169			1.169	0	0.940621				1.169	0	0.964049							0.0234284
								1.17			1.17	0	0.940621				1.17	0	0.964049							0.0234284
								1.171			1.171	0	0.940621				1.171	0	0.964049							0.0234284
								1.172			1.172	0	0.940621				1.172	0	0.964049							0.0234284
								1.173			1.173	0	0.940621				1.173	0	0.964049							0.0234284
								1.174			1.174	0	0.940621				1.174	0	0.964049							0.0234284
								1.175			1.175	0	0.940621				1.175	0	0.964049							0.0234284
								1.176			1.176	0	0.940621				1.176	0	0.964049							0.0234284
								1.177			1.177	0	0.940621				1.177	0	0.964049							0.0234284
								1.178			1.178	0	0.940621				1.178	1	0.964995							0.0243745
								1.179			1.179	0	0.940621				1.179	1	0.965941							0.0253206
								1.18			1.18	0	0.940621				1.18	0	0.965941							0.0253206
								1.181			1.181	0	0.940621				1.181	0	0.965941							0.0253206
								1.182			1.182	0	0.940621				1.182	0	0.965941							0.0253206
								1.183			1.183	0	0.940621				1.183	0	0.965941							0.0253206
								1.184			1.184	0	0.940621				1.184	0	0.965941							0.0253206
								1.185			1.185	0	0.940621				1.185	0	0.965941							0.0253206
								1.186			1.186	0	0.940621				1.186	0	0.965941							0.0253206
								1.187			1.187	0	0.940621				1.187	1	0.966887							0.0262666
								1.188			1.188	0	0.940621				1.188	0	0.966887							0.0262666
								1.189			1.189	0	0.940621				1.189	0	0.966887							0.0262666
								1.19			1.19	0	0.940621				1.19	1	0.967833							0.0272127
								1.191			1.191	0	0.940621				1.191	0	0.967833							0.0272127
								1.192			1.192	0	0.940621				1.192	0	0.967833							0.0272127
								1.193			1.193	0	0.940621				1.193	0	0.967833							0.0272127
								1.194			1.194	0	0.940621				1.194	0	0.967833							0.0272127
								1.195			1.195	0	0.940621				1.195	0	0.967833							0.0272127
								1.196			1.196	0	0.940621				1.196	0	0.967833							0.0272127
								1.197			1.197	0	0.940621				1.197	0	0.967833							0.0272127
								1.198			1.198	1	0.94197				1.198	0	0.967833							0.0258632
								1.199			1.199	0	0.94197				1.199	0	0.967833							0.0258632
								1.2			1.2	0	0.94197				1.2	0	0.967833							0.0258632
								1.201			1.201	0	0.94197				1.201	0	0.967833							0.0258632
								1.202			1.202	0	0.94197				1.202	0	0.967833							0.0258632
								1.203			1.203	0	0.94197				1.203	0	0.967833							0.0258632
								1.204			1.204	0	0.94197				1.204	0	0.967833							0.0258632
								1.205			1.205	1	0.94332				1.205	0	0.967833							0.0245137
								1.206			1.206	0	0.94332				1.206	0	0.967833							0.0245137
								1.207			1.207	0	0.94332				1.207	0	0.967833							0.0245137
								1.208			1.208	0	0.94332				1.208	0	0.967833							0.0245137
								1.209			1.209	0	0.94332				1.209	0	0.967833							0.0245137
								1.21			1.21	0	0.94332				1.21	0	0.967833							0.0245137
								1.211			1.211	1	0.944669				1.211	0	0.967833							0.0231641
								1.212			1.212	0	0.944669				1.212	0	0.967833							0.0231641
								1.213			1.213	0	0.944669				1.213	0	0.967833							0.0231641
								1.214			1.214	0	0.944669				1.214	0	0.967833							0.0231641
								1.215			1.215	0	0.944669				1.215	0	0.967833							0.0231641
								1.216			1.216	0	0.944669				1.216	0	0.967833							0.0231641
								1.217			1.217	0	0.944669				1.217	0	0.967833							0.0231641
								1.218			1.218	1	0.946019				1.218	0	0.967833							0.0218146
								1.219			1.219	0	0.946019				1.219	0	0.967833							0.0218146
								1.22			1.22	0	0.946019				1.22	0	0.967833							0.0218146
								1.221			1.221	0	0.946019				1.221	0	0.967833							0.0218146
								1.222			1.222	0	0.946019				1.222	0	0.967833							0.0218146
								1.223			1.223	0	0.946019				1.223	0	0.967833							0.0218146
								1.224			1.224	0	0.946019				1.224	0	0.967833							0.0218146
								1.225			1.225	0	0.946019				1.225	0	0.967833							0.0218146
								1.226			1.226	0	0.946019				1.226	0	0.967833							0.0218146
								1.227			1.227	0	0.946019				1.227	0	0.967833							0.0218146
								1.228			1.228	0	0.946019				1.228	0	0.967833							0.0218146
								1.229			1.229	0	0.946019				1.229	0	0.967833							0.0218146
								1.23			1.23	0	0.946019				1.23	0	0.967833							0.0218146
								1.231			1.231	0	0.946019				1.231	0	0.967833							0.0218146
								1.232			1.232	0	0.946019				1.232	0	0.967833							0.0218146
								1.233			1.233	0	0.946019				1.233	0	0.967833							0.0218146
								1.234			1.234	0	0.946019				1.234	0	0.967833							0.0218146
								1.235			1.235	0	0.946019				1.235	0	0.967833							0.0218146
								1.236			1.236	0	0.946019				1.236	0	0.967833							0.0218146
								1.237			1.237	0	0.946019				1.237	0	0.967833							0.0218146
								1.238			1.238	0	0.946019				1.238	0	0.967833							0.0218146
								1.239			1.239	0	0.946019				1.239	0	0.967833							0.0218146
								1.24			1.24	0	0.946019				1.24	0	0.967833							0.0218146
								1.241			1.241	0	0.946019				1.241	0	0.967833							0.0218146
								1.242			1.242	1	0.947368				1.242	0	0.967833							0.0204651
								1.243			1.243	0	0.947368				1.243	0	0.967833							0.0204651
								1.244			1.244	0	0.947368				1.244	0	0.967833							0.0204651
								1.245			1.245	0	0.947368				1.245	0	0.967833							0.0204651
								1.246			1.246	0	0.947368				1.246	0	0.967833							0.0204651
								1.247			1.247	0	0.947368				1.247	0	0.967833							0.0204651
								1.248			1.248	0	0.947368				1.248	0	0.967833							0.0204651
								1.249			1.249	0	0.947368				1.249	0	0.967833							0.0204651
								1.25			1.25	0	0.947368				1.25	0	0.967833							0.0204651
								1.251			1.251	0	0.947368				1.251	0	0.967833							0.0204651
								1.252			1.252	0	0.947368				1.252	0	0.967833							0.0204651
								1.253			1.253	0	0.947368				1.253	0	0.967833							0.0204651
								1.254			1.254	0	0.947368				1.254	0	0.967833							0.0204651
								1.255			1.255	0	0.947368				1.255	0	0.967833							0.0204651
								1.256			1.256	0	0.947368				1.256	0	0.967833							0.0204651
								1.257			1.257	0	0.947368				1.257	0	0.967833							0.0204651
								1.258			1.258	0	0.947368				1.258	0	0.967833							0.0204651
								1.259			1.259	0	0.947368				1.259	0	0.967833							0.0204651
								1.26			1.26	0	0.947368				1.26	0	0.967833							0.0204651
								1.261			1.261	1	0.948718				1.261	0	0.967833							0.0191155
								1.262			1.262	0	0.948718				1.262	0	0.967833							0.0191155
								1.263			1.263	0	0.948718				1.263	0	0.967833							0.0191155
								1.264			1.264	0	0.948718				1.264	0	0.967833							0.0191155
								1.265			1.265	0	0.948718				1.265	0	0.967833							0.0191155
								1.266			1.266	0	0.948718				1.266	0	0.967833							0.0191155
								1.267			1.267	1	0.950067				1.267	0	0.967833							0.017766
								1.268			1.268	0	0.950067				1.268	0	0.967833							0.017766
								1.269			1.269	0	0.950067				1.269	0	0.967833							0.017766
								1.27			1.27	0	0.950067				1.27	0	0.967833							0.017766
								1.271			1.271	0	0.950067				1.271	0	0.967833							0.017766
								1.272			1.272	0	0.950067				1.272	0	0.967833							0.017766
								1.273			1.273	0	0.950067				1.273	0	0.967833							0.017766
								1.274			1.274	0	0.950067				1.274	0	0.967833							0.017766
								1.275			1.275	0	0.950067				1.275	0	0.967833							0.017766
								1.276			1.276	0	0.950067				1.276	0	0.967833							0.017766
								1.277			1.277	0	0.950067				1.277	1	0.96878							0.0187121
								1.278			1.278	0	0.950067				1.278	0	0.96878							0.0187121
								1.279			1.279	0	0.950067				1.279	0	0.96878							0.0187121
								1.28			1.28	0	0.950067				1.28	0	0.96878							0.0187121
								1.281			1.281	0	0.950067				1.281	0	0.96878							0.0187121
								1.282			1.282	0	0.950067				1.282	0	0.96878							0.0187121
								1.283			1.283	0	0.950067				1.283	0	0.96878							0.0187121
								1.284			1.284	0	0.950067				1.284	0	0.96878							0.0187121
								1.285			1.285	0	0.950067				1.285	1	0.969726							0.0196582
								1.286			1.286	0	0.950067				1.286	0	0.969726							0.0196582
								1.287			1.287	0	0.950067				1.287	0	0.969726							0.0196582
								1.288			1.288	0	0.950067				1.288	0	0.969726							0.0196582
								1.289			1.289	0	0.950067				1.289	0	0.969726							0.0196582
								1.29			1.29	0	0.950067				1.29	0	0.969726							0.0196582
								1.291			1.291	0	0.950067				1.291	0	0.969726							0.0196582
								1.292			1.292	0	0.950067				1.292	0	0.969726							0.0196582
								1.293			1.293	0	0.950067				1.293	0	0.969726							0.0196582
								1.294			1.294	0	0.950067				1.294	0	0.969726							0.0196582
								1.295			1.295	0	0.950067				1.295	0	0.969726							0.0196582
								1.296			1.296	0	0.950067				1.296	0	0.969726							0.0196582
								1.297			1.297	0	0.950067				1.297	0	0.969726							0.0196582
								1.298			1.298	0	0.950067				1.298	0	0.969726							0.0196582
								1.299			1.299	0	0.950067				1.299	0	0.969726							0.0196582
								1.3			1.3	0	0.950067				1.3	0	0.969726							0.0196582
								1.301			1.301	0	0.950067				1.301	0	0.969726							0.0196582
								1.302			1.302	0	0.950067				1.302	0	0.969726							0.0196582
								1.303			1.303	0	0.950067				1.303	0	0.969726							0.0196582
								1.304			1.304	0	0.950067				1.304	0	0.969726							0.0196582
								1.305			1.305	0	0.950067				1.305	0	0.969726							0.0196582
								1.306			1.306	0	0.950067				1.306	0	0.969726							0.0196582
								1.307			1.307	0	0.950067				1.307	0	0.969726							0.0196582
								1.308			1.308	0	0.950067				1.308	0	0.969726							0.0196582
								1.309			1.309	0	0.950067				1.309	0	0.969726							0.0196582
								1.31			1.31	0	0.950067				1.31	0	0.969726							0.0196582
								1.311			1.311	0	0.950067				1.311	0	0.969726							0.0196582
								1.312			1.312	0	0.950067				1.312	1	0.970672							0.0206042
								1.313			1.313	0	0.950067				1.313	0	0.970672							0.0206042
								1.314			1.314	0	0.950067				1.314	1	0.971618							0.0215503
								1.315			1.315	0	0.950067				1.315	0	0.971618							0.0215503
								1.316			1.316	0	0.950067				1.316	0	0.971618							0.0215503
								1.317			1.317	0	0.950067				1.317	0	0.971618							0.0215503
								1.318			1.318	0	0.950067				1.318	0	0.971618							0.0215503
								1.319			1.319	0	0.950067				1.319	0	0.971618							0.0215503
								1.32			1.32	0	0.950067				1.32	1	0.972564							0.0224964
								1.321			1.321	0	0.950067				1.321	0	0.972564							0.0224964
								1.322			1.322	1	0.951417				1.322	0	0.972564							0.0211469
								1.323			1.323	0	0.951417				1.323	0	0.972564							0.0211469
								1.324			1.324	0	0.951417				1.324	0	0.972564							0.0211469
								1.325			1.325	0	0.951417				1.325	0	0.972564							0.0211469
								1.326			1.326	0	0.951417				1.326	0	0.972564							0.0211469
								1.327			1.327	0	0.951417				1.327	0	0.972564							0.0211469
								1.328			1.328	0	0.951417				1.328	0	0.972564							0.0211469
								1.329			1.329	0	0.951417				1.329	0	0.972564							0.0211469
								1.33			1.33	0	0.951417				1.33	0	0.972564							0.0211469
								1.331			1.331	0	0.951417				1.331	0	0.972564							0.0211469
								1.332			1.332	0	0.951417				1.332	0	0.972564							0.0211469
								1.333			1.333	0	0.951417				1.333	0	0.972564							0.0211469
								1.334			1.334	0	0.951417				1.334	0	0.972564							0.0211469
								1.335			1.335	0	0.951417				1.335	0	0.972564							0.0211469
								1.336			1.336	0	0.951417				1.336	0	0.972564							0.0211469
								1.337			1.337	0	0.951417				1.337	0	0.972564							0.0211469
								1.338			1.338	0	0.951417				1.338	0	0.972564							0.0211469
								1.339			1.339	1	0.952767				1.339	0	0.972564							0.0197973
								1.34			1.34	0	0.952767				1.34	0	0.972564							0.0197973
								1.341			1.341	0	0.952767				1.341	0	0.972564							0.0197973
								1.342			1.342	0	0.952767				1.342	0	0.972564							0.0197973
								1.343			1.343	0	0.952767				1.343	0	0.972564							0.0197973
								1.344			1.344	0	0.952767				1.344	0	0.972564							0.0197973
								1.345			1.345	0	0.952767				1.345	0	0.972564							0.0197973
								1.346			1.346	0	0.952767				1.346	0	0.972564							0.0197973
								1.347			1.347	0	0.952767				1.347	0	0.972564							0.0197973
								1.348			1.348	0	0.952767				1.348	0	0.972564							0.0197973
								1.349			1.349	0	0.952767				1.349	0	0.972564							0.0197973
								1.35			1.35	0	0.952767				1.35	0	0.972564							0.0197973
								1.351			1.351	0	0.952767				1.351	0	0.972564							0.0197973
								1.352			1.352	0	0.952767				1.352	0	0.972564							0.0197973
								1.353			1.353	1	0.954116				1.353	0	0.972564							0.0184478
								1.354			1.354	0	0.954116				1.354	0	0.972564							0.0184478
								1.355			1.355	0	0.954116				1.355	0	0.972564							0.0184478
								1.356			1.356	0	0.954116				1.356	0	0.972564							0.0184478
								1.357			1.357	0	0.954116				1.357	0	0.972564							0.0184478
								1.358			1.358	0	0.954116				1.358	0	0.972564							0.0184478
								1.359			1.359	1	0.955466				1.359	0	0.972564							0.0170983
								1.36			1.36	0	0.955466				1.36	0	0.972564							0.0170983
								1.361			1.361	0	0.955466				1.361	0	0.972564							0.0170983
								1.362			1.362	0	0.955466				1.362	0	0.972564							0.0170983
								1.363			1.363	0	0.955466				1.363	0	0.972564							0.0170983
								1.364			1.364	0	0.955466				1.364	0	0.972564							0.0170983
								1.365			1.365	0	0.955466				1.365	0	0.972564							0.0170983
								1.366			1.366	0	0.955466				1.366	0	0.972564							0.0170983
								1.367			1.367	0	0.955466				1.367	1	0.97351							0.0180443
								1.368			1.368	0	0.955466				1.368	0	0.97351							0.0180443
								1.369			1.369	0	0.955466				1.369	0	0.97351							0.0180443
								1.37			1.37	0	0.955466				1.37	0	0.97351							0.0180443
								1.371			1.371	0	0.955466				1.371	0	0.97351							0.0180443
								1.372			1.372	0	0.955466				1.372	0	0.97351							0.0180443
								1.373			1.373	0	0.955466				1.373	0	0.97351							0.0180443
								1.374			1.374	0	0.955466				1.374	0	0.97351							0.0180443
								1.375			1.375	0	0.955466				1.375	0	0.97351							0.0180443
								1.376			1.376	0	0.955466				1.376	0	0.97351							0.0180443
								1.377			1.377	0	0.955466				1.377	0	0.97351							0.0180443
								1.378			1.378	0	0.955466				1.378	0	0.97351							0.0180443
								1.379			1.379	0	0.955466				1.379	0	0.97351							0.0180443
								1.38			1.38	0	0.955466				1.38	0	0.97351							0.0180443
								1.381			1.381	0	0.955466				1.381	0	0.97351							0.0180443
								1.382			1.382	0	0.955466				1.382	0	0.97351							0.0180443
								1.383			1.383	0	0.955466				1.383	0	0.97351							0.0180443
								1.384			1.384	0	0.955466				1.384	0	0.97351							0.0180443
								1.385			1.385	0	0.955466				1.385	0	0.97351							0.0180443
								1.386			1.386	0	0.955466				1.386	0	0.97351							0.0180443
								1.387			1.387	0	0.955466				1.387	1	0.974456							0.0189904
								1.388			1.388	0	0.955466				1.388	0	0.974456							0.0189904
								1.389			1.389	0	0.955466				1.389	0	0.974456							0.0189904
								1.39			1.39	0	0.955466				1.39	1	0.975402							0.0199365
								1.391			1.391	0	0.955466				1.391	0	0.975402							0.0199365
								1.392			1.392	0	0.955466				1.392	0	0.975402							0.0199365
								1.393			1.393	0	0.955466				1.393	0	0.975402							0.0199365
								1.394			1.394	0	0.955466				1.394	0	0.975402							0.0199365
								1.395			1.395	0	0.955466				1.395	0	0.975402							0.0199365
								1.396			1.396	0	0.955466				1.396	0	0.975402							0.0199365
								1.397			1.397	0	0.955466				1.397	0	0.975402							0.0199365
								1.398			1.398	0	0.955466				1.398	0	0.975402							0.0199365
								1.399			1.399	0	0.955466				1.399	0	0.975402							0.0199365
								1.4			1.4	0	0.955466				1.4	0	0.975402							0.0199365
								1.401			1.401	0	0.955466				1.401	0	0.975402							0.0199365
								1.402			1.402	0	0.955466				1.402	0	0.975402							0.0199365
								1.403			1.403	0	0.955466				1.403	0	0.975402							0.0199365
								1.404			1.404	0	0.955466				1.404	0	0.975402							0.0199365
								1.405			1.405	0	0.955466				1.405	0	0.975402							0.0199365
								1.406			1.406	1	0.956815				1.406	0	0.975402							0.018587
								1.407			1.407	0	0.956815				1.407	0	0.975402							0.018587
								1.408			1.408	0	0.956815				1.408	0	0.975402							0.018587
								1.409			1.409	0	0.956815				1.409	0	0.975402							0.018587
								1.41			1.41	0	0.956815				1.41	0	0.975402							0.018587
								1.411			1.411	0	0.956815				1.411	0	0.975402							0.018587
								1.412			1.412	0	0.956815				1.412	1	0.976348							0.019533
								1.413			1.413	0	0.956815				1.413	0	0.976348							0.019533
								1.414			1.414	0	0.956815				1.414	0	0.976348							0.019533
								1.415			1.415	0	0.956815				1.415	0	0.976348							0.019533
								1.416			1.416	0	0.956815				1.416	0	0.976348							0.019533
								1.417			1.417	0	0.956815				1.417	0	0.976348							0.019533
								1.418			1.418	0	0.956815				1.418	0	0.976348							0.019533
								1.419			1.419	0	0.956815				1.419	0	0.976348							0.019533
								1.42			1.42	0	0.956815				1.42	0	0.976348							0.019533
								1.421			1.421	0	0.956815				1.421	0	0.976348							0.019533
								1.422			1.422	0	0.956815				1.422	0	0.976348							0.019533
								1.423			1.423	0	0.956815				1.423	0	0.976348							0.019533
								1.424			1.424	0	0.956815				1.424	0	0.976348							0.019533
								1.425			1.425	0	0.956815				1.425	0	0.976348							0.019533
								1.426			1.426	0	0.956815				1.426	0	0.976348							0.019533
								1.427			1.427	0	0.956815				1.427	0	0.976348							0.019533
								1.428			1.428	0	0.956815				1.428	0	0.976348							0.019533
								1.429			1.429	0	0.956815				1.429	0	0.976348							0.019533
								1.43			1.43	0	0.956815				1.43	1	0.977294							0.0204791
								1.431			1.431	0	0.956815				1.431	0	0.977294							0.0204791
								1.432			1.432	0	0.956815				1.432	0	0.977294							0.0204791
								1.433			1.433	0	0.956815				1.433	0	0.977294							0.0204791
								1.434			1.434	1	0.958165				1.434	0	0.977294							0.0191296
								1.435			1.435	0	0.958165				1.435	0	0.977294							0.0191296
								1.436			1.436	0	0.958165				1.436	0	0.977294							0.0191296
								1.437			1.437	0	0.958165				1.437	0	0.977294							0.0191296
								1.438			1.438	0	0.958165				1.438	0	0.977294							0.0191296
								1.439			1.439	0	0.958165				1.439	0	0.977294							0.0191296
								1.44			1.44	0	0.958165				1.44	0	0.977294							0.0191296
								1.441			1.441	0	0.958165				1.441	0	0.977294							0.0191296
								1.442			1.442	0	0.958165				1.442	0	0.977294							0.0191296
								1.443			1.443	0	0.958165				1.443	0	0.977294							0.0191296
								1.444			1.444	0	0.958165				1.444	0	0.977294							0.0191296
								1.445			1.445	2	0.960864				1.445	0	0.977294							0.0164305
								1.446			1.446	0	0.960864				1.446	0	0.977294							0.0164305
								1.447			1.447	0	0.960864				1.447	0	0.977294							0.0164305
								1.448			1.448	0	0.960864				1.448	0	0.977294							0.0164305
								1.449			1.449	0	0.960864				1.449	1	0.97824							0.0173766
								1.45			1.45	0	0.960864				1.45	0	0.97824							0.0173766
								1.451			1.451	0	0.960864				1.451	0	0.97824							0.0173766
								1.452			1.452	0	0.960864				1.452	1	0.979186							0.0183227
								1.453			1.453	0	0.960864				1.453	0	0.979186							0.0183227
								1.454			1.454	0	0.960864				1.454	0	0.979186							0.0183227
								1.455			1.455	0	0.960864				1.455	0	0.979186							0.0183227
								1.456			1.456	0	0.960864				1.456	0	0.979186							0.0183227
								1.457			1.457	0	0.960864				1.457	0	0.979186							0.0183227
								1.458			1.458	0	0.960864				1.458	0	0.979186							0.0183227
								1.459			1.459	0	0.960864				1.459	0	0.979186							0.0183227
								1.46			1.46	0	0.960864				1.46	0	0.979186							0.0183227
								1.461			1.461	0	0.960864				1.461	0	0.979186							0.0183227
								1.462			1.462	0	0.960864				1.462	0	0.979186							0.0183227
								1.463			1.463	0	0.960864				1.463	0	0.979186							0.0183227
								1.464			1.464	0	0.960864				1.464	0	0.979186							0.0183227
								1.465			1.465	0	0.960864				1.465	0	0.979186							0.0183227
								1.466			1.466	0	0.960864				1.466	0	0.979186							0.0183227
								1.467			1.467	0	0.960864				1.467	0	0.979186							0.0183227
								1.468			1.468	0	0.960864				1.468	0	0.979186							0.0183227
								1.469			1.469	0	0.960864				1.469	0	0.979186							0.0183227
								1.47			1.47	0	0.960864				1.47	0	0.979186							0.0183227
								1.471			1.471	0	0.960864				1.471	0	0.979186							0.0183227
								1.472			1.472	0	0.960864				1.472	0	0.979186							0.0183227
								1.473			1.473	0	0.960864				1.473	0	0.979186							0.0183227
								1.474			1.474	0	0.960864				1.474	0	0.979186							0.0183227
								1.475			1.475	0	0.960864				1.475	0	0.979186							0.0183227
								1.476			1.476	0	0.960864				1.476	0	0.979186							0.0183227
								1.477			1.477	0	0.960864				1.477	0	0.979186							0.0183227
								1.478			1.478	0	0.960864				1.478	0	0.979186							0.0183227
								1.479			1.479	0	0.960864				1.479	0	0.979186							0.0183227
								1.48			1.48	0	0.960864				1.48	0	0.979186							0.0183227
								1.481			1.481	0	0.960864				1.481	0	0.979186							0.0183227
								1.482			1.482	0	0.960864				1.482	0	0.979186							0.0183227
								1.483			1.483	0	0.960864				1.483	0	0.979186							0.0183227
								1.484			1.484	0	0.960864				1.484	0	0.979186							0.0183227
								1.485			1.485	0	0.960864				1.485	0	0.979186							0.0183227
								1.486			1.486	0	0.960864				1.486	0	0.979186							0.0183227
								1.487			1.487	0	0.960864				1.487	0	0.979186							0.0183227
								1.488			1.488	0	0.960864				1.488	0	0.979186							0.0183227
								1.489			1.489	0	0.960864				1.489	0	0.979186							0.0183227
								1.49			1.49	0	0.960864				1.49	0	0.979186							0.0183227
								1.491			1.491	0	0.960864				1.491	0	0.979186							0.0183227
								1.492			1.492	0	0.960864				1.492	0	0.979186							0.0183227
								1.493			1.493	0	0.960864				1.493	0	0.979186							0.0183227
								1.494			1.494	1	0.962213				1.494	0	0.979186							0.0169732
								1.495			1.495	0	0.962213				1.495	0	0.979186							0.0169732
								1.496			1.496	0	0.962213				1.496	0	0.979186							0.0169732
								1.497			1.497	0	0.962213				1.497	0	0.979186							0.0169732
								1.498			1.498	0	0.962213				1.498	0	0.979186							0.0169732
								1.499			1.499	0	0.962213				1.499	0	0.979186							0.0169732
								1.5			1.5	0	0.962213				1.5	0	0.979186							0.0169732
								1.501			1.501	0	0.962213				1.501	0	0.979186							0.0169732
								1.502			1.502	0	0.962213				1.502	0	0.979186							0.0169732
								1.503			1.503	0	0.962213				1.503	0	0.979186							0.0169732
								1.504			1.504	0	0.962213				1.504	0	0.979186							0.0169732
								1.505			1.505	0	0.962213				1.505	0	0.979186							0.0169732
								1.506			1.506	0	0.962213				1.506	0	0.979186							0.0169732
								1.507			1.507	0	0.962213				1.507	0	0.979186							0.0169732
								1.508			1.508	0	0.962213				1.508	0	0.979186							0.0169732
								1.509			1.509	0	0.962213				1.509	0	0.979186							0.0169732
								1.51			1.51	0	0.962213				1.51	0	0.979186							0.0169732
								1.511			1.511	0	0.962213				1.511	0	0.979186							0.0169732
								1.512			1.512	0	0.962213				1.512	0	0.979186							0.0169732
								1.513			1.513	0	0.962213				1.513	0	0.979186							0.0169732
								1.514			1.514	0	0.962213				1.514	0	0.979186							0.0169732
								1.515			1.515	0	0.962213				1.515	0	0.979186							0.0169732
								1.516			1.516	0	0.962213				1.516	0	0.979186							0.0169732
								1.517			1.517	0	0.962213				1.517	0	0.979186							0.0169732
								1.518			1.518	0	0.962213				1.518	0	0.979186							0.0169732
								1.519			1.519	0	0.962213				1.519	0	0.979186							0.0169732
								1.52			1.52	0	0.962213				1.52	0	0.979186							0.0169732
								1.521			1.521	0	0.962213				1.521	0	0.979186							0.0169732
								1.522			1.522	0	0.962213				1.522	0	0.979186							0.0169732
								1.523			1.523	0	0.962213				1.523	0	0.979186							0.0169732
								1.524			1.524	0	0.962213				1.524	0	0.979186							0.0169732
								1.525			1.525	0	0.962213				1.525	0	0.979186							0.0169732
								1.526			1.526	0	0.962213				1.526	0	0.979186							0.0169732
								1.527			1.527	0	0.962213				1.527	0	0.979186							0.0169732
								1.528			1.528	0	0.962213				1.528	0	0.979186							0.0169732
								1.529			1.529	0	0.962213				1.529	0	0.979186							0.0169732
								1.53			1.53	0	0.962213				1.53	0	0.979186							0.0169732
								1.531			1.531	0	0.962213				1.531	0	0.979186							0.0169732
								1.532			1.532	0	0.962213				1.532	0	0.979186							0.0169732
								1.533			1.533	0	0.962213				1.533	0	0.979186							0.0169732
								1.534			1.534	0	0.962213				1.534	0	0.979186							0.0169732
								1.535			1.535	0	0.962213				1.535	0	0.979186							0.0169732
								1.536			1.536	0	0.962213				1.536	0	0.979186							0.0169732
								1.537			1.537	0	0.962213				1.537	0	0.979186							0.0169732
								1.538			1.538	0	0.962213				1.538	0	0.979186							0.0169732
								1.539			1.539	0	0.962213				1.539	0	0.979186							0.0169732
								1.54			1.54	0	0.962213				1.54	0	0.979186							0.0169732
								1.541			1.541	0	0.962213				1.541	0	0.979186							0.0169732
								1.542			1.542	0	0.962213				1.542	0	0.979186							0.0169732
								1.543			1.543	0	0.962213				1.543	0	0.979186							0.0169732
								1.544			1.544	0	0.962213				1.544	0	0.979186							0.0169732
								1.545			1.545	0	0.962213				1.545	0	0.979186							0.0169732
								1.546			1.546	0	0.962213				1.546	0	0.979186							0.0169732
								1.547			1.547	0	0.962213				1.547	0	0.979186							0.0169732
								1.548			1.548	0	0.962213				1.548	0	0.979186							0.0169732
								1.549			1.549	0	0.962213				1.549	0	0.979186							0.0169732
								1.55			1.55	0	0.962213				1.55	0	0.979186							0.0169732
								1.551			1.551	0	0.962213				1.551	0	0.979186							0.0169732
								1.552			1.552	0	0.962213				1.552	0	0.979186							0.0169732
								1.553			1.553	0	0.962213				1.553	0	0.979186							0.0169732
								1.554			1.554	0	0.962213				1.554	0	0.979186							0.0169732
								1.555			1.555	0	0.962213				1.555	0	0.979186							0.0169732
								1.556			1.556	0	0.962213				1.556	0	0.979186							0.0169732
								1.557			1.557	0	0.962213				1.557	0	0.979186							0.0169732
								1.558			1.558	0	0.962213				1.558	0	0.979186							0.0169732
								1.559			1.559	0	0.962213				1.559	0	0.979186							0.0169732
								1.56			1.56	0	0.962213				1.56	0	0.979186							0.0169732
								1.561			1.561	0	0.962213				1.561	0	0.979186							0.0169732
								1.562			1.562	0	0.962213				1.562	0	0.979186							0.0169732
								1.563			1.563	0	0.962213				1.563	0	0.979186							0.0169732
								1.564			1.564	0	0.962213				1.564	0	0.979186							0.0169732
								1.565			1.565	0	0.962213				1.565	0	0.979186							0.0169732
								1.566			1.566	1	0.963563				1.566	0	0.979186							0.0156236
								1.567			1.567	0	0.963563				1.567	0	0.979186							0.0156236
								1.568			1.568	0	0.963563				1.568	0	0.979186							0.0156236
								1.569			1.569	0	0.963563				1.569	0	0.979186							0.0156236
								1.57			1.57	0	0.963563				1.57	0	0.979186							0.0156236
								1.571			1.571	0	0.963563				1.571	0	0.979186							0.0156236
								1.572			1.572	0	0.963563				1.572	0	0.979186							0.0156236
								1.573			1.573	0	0.963563				1.573	0	0.979186							0.0156236
								1.574			1.574	0	0.963563				1.574	0	0.979186							0.0156236
								1.575			1.575	0	0.963563				1.575	0	0.979186							0.0156236
								1.576			1.576	0	0.963563				1.576	0	0.979186							0.0156236
								1.577			1.577	1	0.964912				1.577	0	0.979186							0.0142741
								1.578			1.578	0	0.964912				1.578	0	0.979186							0.0142741
								1.579			1.579	0	0.964912				1.579	0	0.979186							0.0142741
								1.58			1.58	0	0.964912				1.58	0	0.979186							0.0142741
								1.581			1.581	0	0.964912				1.581	0	0.979186							0.0142741
								1.582			1.582	0	0.964912				1.582	0	0.979186							0.0142741
								1.583			1.583	0	0.964912				1.583	0	0.979186							0.0142741
								1.584			1.584	0	0.964912				1.584	0	0.979186							0.0142741
								1.585			1.585	0	0.964912				1.585	0	0.979186							0.0142741
								1.586			1.586	0	0.964912				1.586	0	0.979186							0.0142741
								1.587			1.587	0	0.964912				1.587	0	0.979186							0.0142741
								1.588			1.588	0	0.964912				1.588	0	0.979186							0.0142741
								1.589			1.589	0	0.964912				1.589	0	0.979186							0.0142741
								1.59			1.59	0	0.964912				1.59	1	0.980132							0.0152202
								1.591			1.591	0	0.964912				1.591	0	0.980132							0.0152202
								1.592			1.592	0	0.964912				1.592	0	0.980132							0.0152202
								1.593			1.593	0	0.964912				1.593	0	0.980132							0.0152202
								1.594			1.594	0	0.964912				1.594	0	0.980132							0.0152202
								1.595			1.595	1	0.966262				1.595	0	0.980132							0.0138706
								1.596			1.596	0	0.966262				1.596	0	0.980132							0.0138706
								1.597			1.597	0	0.966262				1.597	0	0.980132							0.0138706
								1.598			1.598	0	0.966262				1.598	0	0.980132							0.0138706
								1.599			1.599	0	0.966262				1.599	0	0.980132							0.0138706
								1.6			1.6	0	0.966262				1.6	0	0.980132							0.0138706
								1.601			1.601	0	0.966262				1.601	0	0.980132							0.0138706
								1.602			1.602	0	0.966262				1.602	0	0.980132							0.0138706
								1.603			1.603	0	0.966262				1.603	0	0.980132							0.0138706
								1.604			1.604	0	0.966262				1.604	0	0.980132							0.0138706
								1.605			1.605	0	0.966262				1.605	0	0.980132							0.0138706
								1.606			1.606	0	0.966262				1.606	0	0.980132							0.0138706
								1.607			1.607	0	0.966262				1.607	0	0.980132							0.0138706
								1.608			1.608	0	0.966262				1.608	0	0.980132							0.0138706
								1.609			1.609	0	0.966262				1.609	0	0.980132							0.0138706
								1.61			1.61	0	0.966262				1.61	0	0.980132							0.0138706
								1.611			1.611	0	0.966262				1.611	0	0.980132							0.0138706
								1.612			1.612	0	0.966262				1.612	0	0.980132							0.0138706
								1.613			1.613	0	0.966262				1.613	0	0.980132							0.0138706
								1.614			1.614	0	0.966262				1.614	0	0.980132							0.0138706
								1.615			1.615	0	0.966262				1.615	0	0.980132							0.0138706
								1.616			1.616	0	0.966262				1.616	0	0.980132							0.0138706
								1.617			1.617	0	0.966262				1.617	0	0.980132							0.0138706
								1.618			1.618	0	0.966262				1.618	0	0.980132							0.0138706
								1.619			1.619	0	0.966262				1.619	0	0.980132							0.0138706
								1.62			1.62	0	0.966262				1.62	0	0.980132							0.0138706
								1.621			1.621	0	0.966262				1.621	0	0.980132							0.0138706
								1.622			1.622	0	0.966262				1.622	0	0.980132							0.0138706
								1.623			1.623	0	0.966262				1.623	0	0.980132							0.0138706
								1.624			1.624	0	0.966262				1.624	1	0.981079							0.0148167
								1.625			1.625	0	0.966262				1.625	0	0.981079							0.0148167
								1.626			1.626	0	0.966262				1.626	1	0.982025							0.0157628
								1.627			1.627	0	0.966262				1.627	0	0.982025							0.0157628
								1.628			1.628	0	0.966262				1.628	0	0.982025							0.0157628
								1.629			1.629	0	0.966262				1.629	0	0.982025							0.0157628
								1.63			1.63	0	0.966262				1.63	0	0.982025							0.0157628
								1.631			1.631	0	0.966262				1.631	0	0.982025							0.0157628
								1.632			1.632	0	0.966262				1.632	0	0.982025							0.0157628
								1.633			1.633	0	0.966262				1.633	0	0.982025							0.0157628
								1.634			1.634	0	0.966262				1.634	0	0.982025							0.0157628
								1.635			1.635	0	0.966262				1.635	0	0.982025							0.0157628
								1.636			1.636	0	0.966262				1.636	0	0.982025							0.0157628
								1.637			1.637	0	0.966262				1.637	0	0.982025							0.0157628
								1.638			1.638	0	0.966262				1.638	0	0.982025							0.0157628
								1.639			1.639	0	0.966262				1.639	0	0.982025							0.0157628
								1.64			1.64	0	0.966262				1.64	0	0.982025							0.0157628
								1.641			1.641	0	0.966262				1.641	0	0.982025							0.0157628
								1.642			1.642	0	0.966262				1.642	0	0.982025							0.0157628
								1.643			1.643	0	0.966262				1.643	0	0.982025							0.0157628
								1.644			1.644	0	0.966262				1.644	0	0.982025							0.0157628
								1.645			1.645	0	0.966262				1.645	0	0.982025							0.0157628
								1.646			1.646	0	0.966262				1.646	0	0.982025							0.0157628
								1.647			1.647	0	0.966262				1.647	0	0.982025							0.0157628
								1.648			1.648	0	0.966262				1.648	0	0.982025							0.0157628
								1.649			1.649	0	0.966262				1.649	0	0.982025							0.0157628
								1.65			1.65	0	0.966262				1.65	0	0.982025							0.0157628
								1.651			1.651	0	0.966262				1.651	0	0.982025							0.0157628
								1.652			1.652	0	0.966262				1.652	0	0.982025							0.0157628
								1.653			1.653	0	0.966262				1.653	0	0.982025							0.0157628
								1.654			1.654	0	0.966262				1.654	0	0.982025							0.0157628
								1.655			1.655	0	0.966262				1.655	0	0.982025							0.0157628
								1.656			1.656	0	0.966262				1.656	0	0.982025							0.0157628
								1.657			1.657	0	0.966262				1.657	0	0.982025							0.0157628
								1.658			1.658	0	0.966262				1.658	0	0.982025							0.0157628
								1.659			1.659	0	0.966262				1.659	0	0.982025							0.0157628
								1.66			1.66	0	0.966262				1.66	0	0.982025							0.0157628
								1.661			1.661	0	0.966262				1.661	0	0.982025							0.0157628
								1.662			1.662	0	0.966262				1.662	0	0.982025							0.0157628
								1.663			1.663	0	0.966262				1.663	0	0.982025							0.0157628
								1.664			1.664	0	0.966262				1.664	0	0.982025							0.0157628
								1.665			1.665	0	0.966262				1.665	0	0.982025							0.0157628
								1.666			1.666	0	0.966262				1.666	0	0.982025							0.0157628
								1.667			1.667	0	0.966262				1.667	0	0.982025							0.0157628
								1.668			1.668	0	0.966262				1.668	0	0.982025							0.0157628
								1.669			1.669	0	0.966262				1.669	0	0.982025							0.0157628
								1.67			1.67	0	0.966262				1.67	0	0.982025							0.0157628
								1.671			1.671	0	0.966262				1.671	0	0.982025							0.0157628
								1.672			1.672	0	0.966262				1.672	0	0.982025							0.0157628
								1.673			1.673	0	0.966262				1.673	0	0.982025							0.0157628
								1.674			1.674	0	0.966262				1.674	0	0.982025							0.0157628
								1.675			1.675	0	0.966262				1.675	0	0.982025							0.0157628
								1.676			1.676	0	0.966262				1.676	0	0.982025							0.0157628
								1.677			1.677	0	0.966262				1.677	0	0.982025							0.0157628
								1.678			1.678	0	0.966262				1.678	0	0.982025							0.0157628
								1.679			1.679	0	0.966262				1.679	0	0.982025							0.0157628
								1.68			1.68	0	0.966262				1.68	0	0.982025							0.0157628
								1.681			1.681	0	0.966262				1.681	0	0.982025							0.0157628
								1.682			1.682	0	0.966262				1.682	0	0.982025							0.0157628
								1.683			1.683	0	0.966262				1.683	0	0.982025							0.0157628
								1.684			1.684	0	0.966262				1.684	0	0.982025							0.0157628
								1.685			1.685	0	0.966262				1.685	0	0.982025							0.0157628
								1.686			1.686	0	0.966262				1.686	0	0.982025							0.0157628
								1.687			1.687	0	0.966262				1.687	0	0.982025							0.0157628
								1.688			1.688	0	0.966262				1.688	0	0.982025							0.0157628
								1.689			1.689	0	0.966262				1.689	0	0.982025							0.0157628
								1.69			1.69	0	0.966262				1.69	0	0.982025							0.0157628
								1.691			1.691	0	0.966262				1.691	0	0.982025							0.0157628
								1.692			1.692	0	0.966262				1.692	0	0.982025							0.0157628
								1.693			1.693	0	0.966262				1.693	0	0.982025							0.0157628
								1.694			1.694	0	0.966262				1.694	0	0.982025							0.0157628
								1.695			1.695	0	0.966262				1.695	0	0.982025							0.0157628
								1.696			1.696	0	0.966262				1.696	0	0.982025							0.0157628
								1.697			1.697	0	0.966262				1.697	0	0.982025							0.0157628
								1.698			1.698	0	0.966262				1.698	0	0.982025							0.0157628
								1.699			1.699	0	0.966262				1.699	0	0.982025							0.0157628
								1.7			1.7	0	0.966262				1.7	0	0.982025							0.0157628
								1.701			1.701	0	0.966262				1.701	0	0.982025							0.0157628
								1.702			1.702	0	0.966262				1.702	0	0.982025							0.0157628
								1.703			1.703	0	0.966262				1.703	0	0.982025							0.0157628
								1.704			1.704	0	0.966262				1.704	0	0.982025							0.0157628
								1.705			1.705	0	0.966262				1.705	0	0.982025							0.0157628
								1.706			1.706	0	0.966262				1.706	0	0.982025							0.0157628
								1.707			1.707	0	0.966262				1.707	0	0.982025							0.0157628
								1.708			1.708	0	0.966262				1.708	0	0.982025							0.0157628
								1.709			1.709	0	0.966262				1.709	0	0.982025							0.0157628
								1.71			1.71	0	0.966262				1.71	0	0.982025							0.0157628
								1.711			1.711	0	0.966262				1.711	0	0.982025							0.0157628
								1.712			1.712	0	0.966262				1.712	0	0.982025							0.0157628
								1.713			1.713	0	0.966262				1.713	0	0.982025							0.0157628
								1.714			1.714	0	0.966262				1.714	0	0.982025							0.0157628
								1.715			1.715	0	0.966262				1.715	0	0.982025							0.0157628
								1.716			1.716	0	0.966262				1.716	0	0.982025							0.0157628
								1.717			1.717	0	0.966262				1.717	0	0.982025							0.0157628
								1.718			1.718	1	0.967611				1.718	0	0.982025							0.0144133
								1.719			1.719	0	0.967611				1.719	0	0.982025							0.0144133
								1.72			1.72	0	0.967611				1.72	0	0.982025							0.0144133
								1.721			1.721	0	0.967611				1.721	1	0.982971							0.0153593
								1.722			1.722	0	0.967611				1.722	0	0.982971							0.0153593
								1.723			1.723	0	0.967611				1.723	0	0.982971							0.0153593
								1.724			1.724	0	0.967611				1.724	0	0.982971							0.0153593
								1.725			1.725	0	0.967611				1.725	0	0.982971							0.0153593
								1.726			1.726	0	0.967611				1.726	0	0.982971							0.0153593
								1.727			1.727	0	0.967611				1.727	0	0.982971							0.0153593
								1.728			1.728	0	0.967611				1.728	0	0.982971							0.0153593
								1.729			1.729	0	0.967611				1.729	0	0.982971							0.0153593
								1.73			1.73	0	0.967611				1.73	0	0.982971							0.0153593
								1.731			1.731	0	0.967611				1.731	0	0.982971							0.0153593
								1.732			1.732	0	0.967611				1.732	0	0.982971							0.0153593
								1.733			1.733	0	0.967611				1.733	0	0.982971							0.0153593
								1.734			1.734	1	0.968961				1.734	0	0.982971							0.0140098
								1.735			1.735	0	0.968961				1.735	0	0.982971							0.0140098
								1.736			1.736	0	0.968961				1.736	0	0.982971							0.0140098
								1.737			1.737	0	0.968961				1.737	0	0.982971							0.0140098
								1.738			1.738	0	0.968961				1.738	0	0.982971							0.0140098
								1.739			1.739	0	0.968961				1.739	0	0.982971							0.0140098
								1.74			1.74	0	0.968961				1.74	0	0.982971							0.0140098
								1.741			1.741	0	0.968961				1.741	0	0.982971							0.0140098
								1.742			1.742	0	0.968961				1.742	0	0.982971							0.0140098
								1.743			1.743	0	0.968961				1.743	0	0.982971							0.0140098
								1.744			1.744	0	0.968961				1.744	0	0.982971							0.0140098
								1.745			1.745	0	0.968961				1.745	0	0.982971							0.0140098
								1.746			1.746	0	0.968961				1.746	0	0.982971							0.0140098
								1.747			1.747	0	0.968961				1.747	0	0.982971							0.0140098
								1.748			1.748	0	0.968961				1.748	0	0.982971							0.0140098
								1.749			1.749	0	0.968961				1.749	0	0.982971							0.0140098
								1.75			1.75	0	0.968961				1.75	0	0.982971							0.0140098
								1.751			1.751	0	0.968961				1.751	0	0.982971							0.0140098
								1.752			1.752	0	0.968961				1.752	0	0.982971							0.0140098
								1.753			1.753	0	0.968961				1.753	0	0.982971							0.0140098
								1.754			1.754	0	0.968961				1.754	0	0.982971							0.0140098
								1.755			1.755	1	0.97031				1.755	0	0.982971							0.0126603
								1.756			1.756	0	0.97031				1.756	0	0.982971							0.0126603
								1.757			1.757	0	0.97031				1.757	0	0.982971							0.0126603
								1.758			1.758	0	0.97031				1.758	0	0.982971							0.0126603
								1.759			1.759	0	0.97031				1.759	0	0.982971							0.0126603
								1.76			1.76	0	0.97031				1.76	0	0.982971							0.0126603
								1.761			1.761	0	0.97031				1.761	0	0.982971							0.0126603
								1.762			1.762	0	0.97031				1.762	0	0.982971							0.0126603
								1.763			1.763	0	0.97031				1.763	0	0.982971							0.0126603
								1.764			1.764	0	0.97031				1.764	0	0.982971							0.0126603
								1.765			1.765	0	0.97031				1.765	0	0.982971							0.0126603
								1.766			1.766	0	0.97031				1.766	0	0.982971							0.0126603
								1.767			1.767	0	0.97031				1.767	0	0.982971							0.0126603
								1.768			1.768	0	0.97031				1.768	0	0.982971							0.0126603
								1.769			1.769	0	0.97031				1.769	1	0.983917							0.0136064
								1.77			1.77	0	0.97031				1.77	0	0.983917							0.0136064
								1.771			1.771	0	0.97031				1.771	0	0.983917							0.0136064
								1.772			1.772	0	0.97031				1.772	0	0.983917							0.0136064
								1.773			1.773	1	0.97166				1.773	0	0.983917							0.0122568
								1.774			1.774	0	0.97166				1.774	0	0.983917							0.0122568
								1.775			1.775	0	0.97166				1.775	0	0.983917							0.0122568
								1.776			1.776	0	0.97166				1.776	0	0.983917							0.0122568
								1.777			1.777	0	0.97166				1.777	0	0.983917							0.0122568
								1.778			1.778	0	0.97166				1.778	0	0.983917							0.0122568
								1.779			1.779	0	0.97166				1.779	0	0.983917							0.0122568
								1.78			1.78	0	0.97166				1.78	0	0.983917							0.0122568
								1.781			1.781	2	0.974359				1.781	0	0.983917							0.00955777
								1.782			1.782	0	0.974359				1.782	0	0.983917							0.00955777
								1.783			1.783	0	0.974359				1.783	0	0.983917							0.00955777
								1.784			1.784	0	0.974359				1.784	0	0.983917							0.00955777
								1.785			1.785	0	0.974359				1.785	0	0.983917							0.00955777
								1.786			1.786	0	0.974359				1.786	0	0.983917							0.00955777
								1.787			1.787	0	0.974359				1.787	0	0.983917							0.00955777
								1.788			1.788	0	0.974359				1.788	0	0.983917							0.00955777
								1.789			1.789	0	0.974359				1.789	0	0.983917							0.00955777
								1.79			1.79	0	0.974359				1.79	0	0.983917							0.00955777
								1.791			1.791	0	0.974359				1.791	0	0.983917							0.00955777
								1.792			1.792	0	0.974359				1.792	1	0.984863							0.0105038
								1.793			1.793	0	0.974359				1.793	0	0.984863							0.0105038
								1.794			1.794	0	0.974359				1.794	0	0.984863							0.0105038
								1.795			1.795	0	0.974359				1.795	0	0.984863							0.0105038
								1.796			1.796	0	0.974359				1.796	0	0.984863							0.0105038
								1.797			1.797	0	0.974359				1.797	0	0.984863							0.0105038
								1.798			1.798	0	0.974359				1.798	0	0.984863							0.0105038
								1.799			1.799	0	0.974359				1.799	0	0.984863							0.0105038
								1.8			1.8	0	0.974359				1.8	0	0.984863							0.0105038
								1.801			1.801	0	0.974359				1.801	0	0.984863							0.0105038
								1.802			1.802	0	0.974359				1.802	0	0.984863							0.0105038
								1.803			1.803	0	0.974359				1.803	0	0.984863							0.0105038
								1.804			1.804	0	0.974359				1.804	0	0.984863							0.0105038
								1.805			1.805	0	0.974359				1.805	0	0.984863							0.0105038
								1.806			1.806	0	0.974359				1.806	0	0.984863							0.0105038
								1.807			1.807	0	0.974359				1.807	0	0.984863							0.0105038
								1.808			1.808	0	0.974359				1.808	0	0.984863							0.0105038
								1.809			1.809	0	0.974359				1.809	0	0.984863							0.0105038
								1.81			1.81	0	0.974359				1.81	0	0.984863							0.0105038
								1.811			1.811	0	0.974359				1.811	0	0.984863							0.0105038
								1.812			1.812	0	0.974359				1.812	0	0.984863							0.0105038
								1.813			1.813	0	0.974359				1.813	0	0.984863							0.0105038
								1.814			1.814	0	0.974359				1.814	0	0.984863							0.0105038
								1.815			1.815	0	0.974359				1.815	0	0.984863							0.0105038
								1.816			1.816	0	0.974359				1.816	0	0.984863							0.0105038
								1.817			1.817	0	0.974359				1.817	0	0.984863							0.0105038
								1.818			1.818	0	0.974359				1.818	0	0.984863							0.0105038
								1.819			1.819	0	0.974359				1.819	0	0.984863							0.0105038
								1.82			1.82	0	0.974359				1.82	0	0.984863							0.0105038
								1.821			1.821	0	0.974359				1.821	0	0.984863							0.0105038
								1.822			1.822	0	0.974359				1.822	0	0.984863							0.0105038
								1.823			1.823	0	0.974359				1.823	0	0.984863							0.0105038
								1.824			1.824	0	0.974359				1.824	0	0.984863							0.0105038
								1.825			1.825	0	0.974359				1.825	0	0.984863							0.0105038
								1.826			1.826	0	0.974359				1.826	0	0.984863							0.0105038
								1.827			1.827	0	0.974359				1.827	0	0.984863							0.0105038
								1.828			1.828	0	0.974359				1.828	0	0.984863							0.0105038
								1.829			1.829	0	0.974359				1.829	0	0.984863							0.0105038
								1.83			1.83	0	0.974359				1.83	0	0.984863							0.0105038
								1.831			1.831	0	0.974359				1.831	0	0.984863							0.0105038
								1.832			1.832	0	0.974359				1.832	0	0.984863							0.0105038
								1.833			1.833	0	0.974359				1.833	0	0.984863							0.0105038
								1.834			1.834	0	0.974359				1.834	0	0.984863							0.0105038
								1.835			1.835	0	0.974359				1.835	0	0.984863							0.0105038
								1.836			1.836	0	0.974359				1.836	0	0.984863							0.0105038
								1.837			1.837	0	0.974359				1.837	0	0.984863							0.0105038
								1.838			1.838	0	0.974359				1.838	0	0.984863							0.0105038
								1.839			1.839	0	0.974359				1.839	0	0.984863							0.0105038
								1.84			1.84	0	0.974359				1.84	0	0.984863							0.0105038
								1.841			1.841	0	0.974359				1.841	0	0.984863							0.0105038
								1.842			1.842	0	0.974359				1.842	0	0.984863							0.0105038
								1.843			1.843	0	0.974359				1.843	0	0.984863							0.0105038
								1.844			1.844	0	0.974359				1.844	0	0.984863							0.0105038
								1.845			1.845	0	0.974359				1.845	0	0.984863							0.0105038
								1.846			1.846	0	0.974359				1.846	0	0.984863							0.0105038
								1.847			1.847	0	0.974359				1.847	0	0.984863							0.0105038
								1.848			1.848	0	0.974359				1.848	0	0.984863							0.0105038
								1.849			1.849	0	0.974359				1.849	0	0.984863							0.0105038
								1.85			1.85	0	0.974359				1.85	0	0.984863							0.0105038
								1.851			1.851	0	0.974359				1.851	0	0.984863							0.0105038
								1.852			1.852	0	0.974359				1.852	0	0.984863							0.0105038
								1.853			1.853	0	0.974359				1.853	0	0.984863							0.0105038
								1.854			1.854	0	0.974359				1.854	0	0.984863							0.0105038
								1.855			1.855	0	0.974359				1.855	0	0.984863							0.0105038
								1.856			1.856	0	0.974359				1.856	0	0.984863							0.0105038
								1.857			1.857	0	0.974359				1.857	0	0.984863							0.0105038
								1.858			1.858	0	0.974359				1.858	0	0.984863							0.0105038
								1.859			1.859	0	0.974359				1.859	0	0.984863							0.0105038
								1.86			1.86	0	0.974359				1.86	0	0.984863							0.0105038
								1.861			1.861	0	0.974359				1.861	0	0.984863							0.0105038
								1.862			1.862	0	0.974359				1.862	0	0.984863							0.0105038
								1.863			1.863	0	0.974359				1.863	0	0.984863							0.0105038
								1.864			1.864	0	0.974359				1.864	0	0.984863							0.0105038
								1.865			1.865	0	0.974359				1.865	0	0.984863							0.0105038
								1.866			1.866	0	0.974359				1.866	0	0.984863							0.0105038
								1.867			1.867	0	0.974359				1.867	0	0.984863							0.0105038
								1.868			1.868	0	0.974359				1.868	0	0.984863							0.0105038
								1.869			1.869	0	0.974359				1.869	0	0.984863							0.0105038
								1.87			1.87	0	0.974359				1.87	0	0.984863							0.0105038
								1.871			1.871	0	0.974359				1.871	0	0.984863							0.0105038
								1.872			1.872	1	0.975709				1.872	0	0.984863							0.00915432
								1.873			1.873	0	0.975709				1.873	0	0.984863							0.00915432
								1.874			1.874	0	0.975709				1.874	0	0.984863							0.00915432
								1.875			1.875	0	0.975709				1.875	0	0.984863							0.00915432
								1.876			1.876	0	0.975709				1.876	0	0.984863							0.00915432
								1.877			1.877	0	0.975709				1.877	0	0.984863							0.00915432
								1.878			1.878	0	0.975709				1.878	0	0.984863							0.00915432
								1.879			1.879	0	0.975709				1.879	0	0.984863							0.00915432
								1.88			1.88	0	0.975709				1.88	0	0.984863							0.00915432
								1.881			1.881	0	0.975709				1.881	0	0.984863							0.00915432
								1.882			1.882	0	0.975709				1.882	0	0.984863							0.00915432
								1.883			1.883	0	0.975709				1.883	0	0.984863							0.00915432
								1.884			1.884	0	0.975709				1.884	0	0.984863							0.00915432
								1.885			1.885	0	0.975709				1.885	0	0.984863							0.00915432
								1.886			1.886	0	0.975709				1.886	0	0.984863							0.00915432
								1.887			1.887	0	0.975709				1.887	0	0.984863							0.00915432
								1.888			1.888	0	0.975709				1.888	0	0.984863							0.00915432
								1.889			1.889	1	0.977058				1.889	0	0.984863							0.00780479
								1.89			1.89	0	0.977058				1.89	0	0.984863							0.00780479
								1.891			1.891	0	0.977058				1.891	0	0.984863							0.00780479
								1.892			1.892	0	0.977058				1.892	0	0.984863							0.00780479
								1.893			1.893	0	0.977058				1.893	0	0.984863							0.00780479
								1.894			1.894	0	0.977058				1.894	0	0.984863							0.00780479
								1.895			1.895	0	0.977058				1.895	0	0.984863							0.00780479
								1.896			1.896	0	0.977058				1.896	0	0.984863							0.00780479
								1.897			1.897	0	0.977058				1.897	0	0.984863							0.00780479
								1.898			1.898	0	0.977058				1.898	0	0.984863							0.00780479
								1.899			1.899	0	0.977058				1.899	0	0.984863							0.00780479
								1.9			1.9	0	0.977058				1.9	0	0.984863							0.00780479
								1.901			1.901	0	0.977058				1.901	0	0.984863							0.00780479
								1.902			1.902	0	0.977058				1.902	0	0.984863							0.00780479
								1.903			1.903	0	0.977058				1.903	0	0.984863							0.00780479
								1.904			1.904	0	0.977058				1.904	0	0.984863							0.00780479
								1.905			1.905	0	0.977058				1.905	0	0.984863							0.00780479
								1.906			1.906	0	0.977058				1.906	0	0.984863							0.00780479
								1.907			1.907	0	0.977058				1.907	0	0.984863							0.00780479
								1.908			1.908	0	0.977058				1.908	0	0.984863							0.00780479
								1.909			1.909	0	0.977058				1.909	0	0.984863							0.00780479
								1.91			1.91	0	0.977058				1.91	0	0.984863							0.00780479
								1.911			1.911	0	0.977058				1.911	0	0.984863							0.00780479
								1.912			1.912	0	0.977058				1.912	0	0.984863							0.00780479
								1.913			1.913	0	0.977058				1.913	0	0.984863							0.00780479
								1.914			1.914	0	0.977058				1.914	0	0.984863							0.00780479
								1.915			1.915	0	0.977058				1.915	0	0.984863							0.00780479
								1.916			1.916	0	0.977058				1.916	0	0.984863							0.00780479
								1.917			1.917	0	0.977058				1.917	0	0.984863							0.00780479
								1.918			1.918	0	0.977058				1.918	0	0.984863							0.00780479
								1.919			1.919	0	0.977058				1.919	0	0.984863							0.00780479
								1.92			1.92	0	0.977058				1.92	0	0.984863							0.00780479
								1.921			1.921	0	0.977058				1.921	0	0.984863							0.00780479
								1.922			1.922	0	0.977058				1.922	0	0.984863							0.00780479
								1.923			1.923	0	0.977058				1.923	0	0.984863							0.00780479
								1.924			1.924	0	0.977058				1.924	0	0.984863							0.00780479
								1.925			1.925	0	0.977058				1.925	0	0.984863							0.00780479
								1.926			1.926	0	0.977058				1.926	0	0.984863							0.00780479
								1.927			1.927	0	0.977058				1.927	0	0.984863							0.00780479
								1.928			1.928	0	0.977058				1.928	1	0.985809							0.00875086
								1.929			1.929	0	0.977058				1.929	0	0.985809							0.00875086
								1.93			1.93	0	0.977058				1.93	0	0.985809							0.00875086
								1.931			1.931	0	0.977058				1.931	0	0.985809							0.00875086
								1.932			1.932	0	0.977058				1.932	0	0.985809							0.00875086
								1.933			1.933	0	0.977058				1.933	0	0.985809							0.00875086
								1.934			1.934	0	0.977058				1.934	0	0.985809							0.00875086
								1.935			1.935	0	0.977058				1.935	0	0.985809							0.00875086
								1.936			1.936	0	0.977058				1.936	0	0.985809							0.00875086
								1.937			1.937	0	0.977058				1.937	0	0.985809							0.00875086
								1.938			1.938	0	0.977058				1.938	0	0.985809							0.00875086
								1.939			1.939	0	0.977058				1.939	0	0.985809							0.00875086
								1.94			1.94	0	0.977058				1.94	0	0.985809							0.00875086
								1.941			1.941	1	0.978408				1.941	0	0.985809							0.00740134
								1.942			1.942	0	0.978408				1.942	0	0.985809							0.00740134
								1.943			1.943	0	0.978408				1.943	0	0.985809							0.00740134
								1.944			1.944	0	0.978408				1.944	0	0.985809							0.00740134
								1.945			1.945	0	0.978408				1.945	0	0.985809							0.00740134
								1.946			1.946	0	0.978408				1.946	0	0.985809							0.00740134
								1.947			1.947	0	0.978408				1.947	0	0.985809							0.00740134
								1.948			1.948	0	0.978408				1.948	0	0.985809							0.00740134
								1.949			1.949	0	0.978408				1.949	0	0.985809							0.00740134
								1.95			1.95	0	0.978408				1.95	0	0.985809							0.00740134
								1.951			1.951	0	0.978408				1.951	0	0.985809							0.00740134
								1.952			1.952	0	0.978408				1.952	0	0.985809							0.00740134
								1.953			1.953	0	0.978408				1.953	0	0.985809							0.00740134
								1.954			1.954	0	0.978408				1.954	0	0.985809							0.00740134
								1.955			1.955	0	0.978408				1.955	0	0.985809							0.00740134
								1.956			1.956	0	0.978408				1.956	0	0.985809							0.00740134
								1.957			1.957	0	0.978408				1.957	0	0.985809							0.00740134
								1.958			1.958	0	0.978408				1.958	0	0.985809							0.00740134
								1.959			1.959	0	0.978408				1.959	0	0.985809							0.00740134
								1.96			1.96	0	0.978408				1.96	0	0.985809							0.00740134
								1.961			1.961	0	0.978408				1.961	0	0.985809							0.00740134
								1.962			1.962	0	0.978408				1.962	0	0.985809							0.00740134
								1.963			1.963	0	0.978408				1.963	0	0.985809							0.00740134
								1.964			1.964	0	0.978408				1.964	0	0.985809							0.00740134
								1.965			1.965	0	0.978408				1.965	0	0.985809							0.00740134
								1.966			1.966	0	0.978408				1.966	0	0.985809							0.00740134
								1.967			1.967	0	0.978408				1.967	0	0.985809							0.00740134
								1.968			1.968	0	0.978408				1.968	0	0.985809							0.00740134
								1.969			1.969	0	0.978408				1.969	0	0.985809							0.00740134
								1.97			1.97	0	0.978408				1.97	0	0.985809							0.00740134
								1.971			1.971	0	0.978408				1.971	0	0.985809							0.00740134
								1.972			1.972	0	0.978408				1.972	0	0.985809							0.00740134
								1.973			1.973	0	0.978408				1.973	0	0.985809							0.00740134
								1.974			1.974	0	0.978408				1.974	0	0.985809							0.00740134
								1.975			1.975	0	0.978408				1.975	0	0.985809							0.00740134
								1.976			1.976	0	0.978408				1.976	0	0.985809							0.00740134
								1.977			1.977	0	0.978408				1.977	0	0.985809							0.00740134
								1.978			1.978	0	0.978408				1.978	0	0.985809							0.00740134
								1.979			1.979	0	0.978408				1.979	0	0.985809							0.00740134
								1.98			1.98	0	0.978408				1.98	1	0.986755							0.00834741
								1.981			1.981	0	0.978408				1.981	0	0.986755							0.00834741
								1.982			1.982	0	0.978408				1.982	0	0.986755							0.00834741
								1.983			1.983	0	0.978408				1.983	0	0.986755							0.00834741
								1.984			1.984	0	0.978408				1.984	0	0.986755							0.00834741
								1.985			1.985	0	0.978408				1.985	0	0.986755							0.00834741
								1.986			1.986	0	0.978408				1.986	0	0.986755							0.00834741
								1.987			1.987	0	0.978408				1.987	0	0.986755							0.00834741
								1.988			1.988	0	0.978408				1.988	0	0.986755							0.00834741
								1.989			1.989	0	0.978408				1.989	0	0.986755							0.00834741
								1.99			1.99	0	0.978408				1.99	0	0.986755							0.00834741
								1.991			1.991	0	0.978408				1.991	0	0.986755							0.00834741
								1.992			1.992	0	0.978408				1.992	0	0.986755							0.00834741
								1.993			1.993	0	0.978408				1.993	0	0.986755							0.00834741
								1.994			1.994	0	0.978408				1.994	0	0.986755							0.00834741
								1.995			1.995	0	0.978408				1.995	1	0.987701							0.00929348
[truncated: 1,697 more rows]

## Sheet: Fig 4B2
									CONTROL						ANISO						Control											Double Exponential Fits Done In IGOR (WaveMetrics)
									MINI4				1816		MINI4				2046		Vs Aniso	0	0			2 EXPONENTIAL FIT
									Interval		1816				Interval		2046				MAX DIFF	6	0			aniso	control					fit_control4= W_coef[0]+W_coef[1]*exp(-W_coef[2]*x)+W_coef[3]*exp(-W_coef[4]*x)
									Post-Tetanus		Bin	Frequency			Post-Tetanus		Bin	Frequency			0.0613435	Enter n	468		0.006	-0.0188768	-0.00198682		-0.00999038	-0.0367426		W_coef={0.99935,-0.27374,3.2422,-0.77985,10.356}
								0.001	5.2	0.0052	0.001	0	0		5.3	0.0053	0.001	0	0		0	Enter m	459		0.007	-0.00847765	0.00643288		-0.00135666	-0.0257542		V_chisq= 0.0328051;V_npnts= 3691;V_numNaNs= 0;V_numINFs= 0;
								0.002	5.3	0.0053	0.002	0	0		5.7	0.0057	0.002	0	0		0	Enter diff	0.06134		0.008	0.00179705	0.014772		0.00719249	-0.0149038		V_startRow= 0;V_endRow= 3690;
								0.003	6.1	0.0061	0.003	0	0		5.8	0.0058	0.003	0	0		0	0.34971	P-Value		0.009	0.0119489	0.0230313		0.0156579	-0.00418973		W_sigma={6.55e-05,0.00369,0.0237,0.00347,0.0438}
								0.004	6.2	0.0062	0.004	0	0		5.9	0.0059	0.004	0	0		0				0.01	0.0219794	0.0312116		0.0240405	0.00638993		Coefficient values ± one standard deviation					Control
								0.005	6.4	0.0064	0.005	0	0		6.3	0.0063	0.005	0	0		0				0.011	0.0318902	0.0393137		0.0323412	0.0168369			y0	=0.99935 ± 6.55e-005				-1.05355
								0.006	6.6	0.0066	0.006	2	0.00110132		6.9	0.0069	0.006	4	0.00195503		0.000853713				0.012	0.0416827	0.0473384		0.0405606	0.0271531			A1	=-0.27374 ± 0.00369			-0.2737	0.259788
								0.007	6.7	0.0067	0.007	8	0.00550661		6.9	0.0069	0.007	5	0.00439883		-0.00110778				0.013	0.0513585	0.0552864		0.0486998	0.0373401			invTau1	=3.2422 ± 0.0237			3.2422		308.433
								0.008	6.9	0.0069	0.008	3	0.00715859		6.9	0.0069	0.008	12	0.0102639		0.00310534				0.014	0.060919	0.0631586		0.0567595	0.0473997			A2	=-0.77985 ± 0.00347			-0.77985	0.740212
								0.009	6.9	0.0069	0.009	5	0.00991189		7	0.007	0.009	5	0.0127077		0.00279583				0.015	0.0703657	0.0709557		0.0647405	0.0573337			invTau2	=10.356 ± 0.0438			10.356		96.5624
								0.01	7	0.007	0.01	14	0.0176211		7.1	0.0071	0.01	9	0.0171065		-0.000514596				0.016	0.0797001	0.0786784		0.0726437	0.0671436		•ModifyGraph rgb(fit_control4)=(34816,34816,34816)
								0.011	7.5	0.0075	0.011	12	0.0242291		7.2	0.0072	0.011	16	0.0249267		0.000697611				0.017	0.0889236	0.0863275		0.0804698	0.0768312		•CurveFit/L=3691 /NTHR=0 dblexp aniso4 /X=time4 /D
								0.012	7.6	0.0076	0.012	12	0.030837		7.3	0.0073	0.012	16	0.0327468		0.00190982				0.018	0.0980375	0.0939038		0.0882197	0.086398
								0.013	7.7	0.0077	0.013	12	0.0374449		7.3	0.0073	0.013	17	0.0410557		0.00361078				0.019	0.107043	0.101408		0.0958941	0.0958457		Fit converged properly
								0.014	8.1	0.0081	0.014	8	0.0418502		7.4	0.0074	0.014	13	0.0474096		0.00555936				0.02	0.115942	0.108841		0.103494	0.105176		fit_aniso4= W_coef[0]+W_coef[1]*exp(-W_coef[2]*x)+W_coef[3]*exp(-W_coef[4]*x)
								0.015	8.2	0.0082	0.015	13	0.0490088		7.5	0.0075	0.015	14	0.0542522		0.00524339				0.021	0.124736	0.116203		0.11102	0.11439		W_coef={0.99862,-0.33006,4.0211,-0.75254,13.183}
								0.016	8.7	0.0087	0.016	10	0.0545154		7.6	0.0076	0.016	22	0.0650049		0.0104895				0.022	0.133426	0.123495		0.118472	0.12349		V_chisq= 0.0328446;V_npnts= 3691;V_numNaNs= 0;V_numINFs= 0;
								0.017	8.8	0.0088	0.017	14	0.0622247		7.6	0.0076	0.017	13	0.0713587		0.00913408				0.023	0.142013	0.130717		0.125852	0.132477		V_startRow= 0;V_endRow= 3690;
								0.018	9	0.009	0.018	18	0.0721366		7.8	0.0078	0.018	17	0.0796676		0.00753108				0.024	0.150498	0.137872		0.133161	0.141352		W_sigma={6.1e-05,0.0038,0.0253,0.00355,0.0622}
								0.019	9.1	0.0091	0.019	23	0.0848018		8	0.008	0.019	14	0.0865103		0.0017085				0.025	0.158883	0.144958		0.140398	0.150118		Coefficient values ± one standard deviation					ANISO
								0.02	9.1	0.0091	0.02	8	0.089207		8	0.008	0.02	16	0.0943304		0.00512335				0.026	0.16717	0.151977		0.147566	0.158775			y0	=0.99862 ± 6.1e-005			0.99862	-1.0826
								0.021	9.2	0.0092	0.021	13	0.0963656		8	0.008	0.021	20	0.104106		0.00773993				0.027	0.175358	0.15893		0.154664	0.167326			A1	=-0.33006 ± 0.0038			-0.33006	0.304877
								0.022	9.4	0.0094	0.022	16	0.105176		8.5	0.0085	0.022	18	0.112903		0.00772701				0.028	0.183451	0.165816		0.161693	0.17577			invTau1	=4.0211 ± 0.0253			4.0211		248.688
								0.023	9.4	0.0094	0.023	16	0.113987		8.6	0.0086	0.023	16	0.120723		0.00673658				0.029	0.191448	0.172638		0.168654	0.184111			A2	=-0.75254 ± 0.00355			-0.75254	0.695123
								0.024	9.5	0.0095	0.024	14	0.121696		8.7	0.0087	0.024	20	0.130499		0.0088025				0.03	0.199351	0.179395		0.175547	0.192348			invTau2	=13.183 ± 0.0622			13.183		75.8553
								0.025	9.5	0.0095	0.025	17	0.131057		8.8	0.0088	0.025	14	0.137341		0.00628388				0.031	0.207161	0.186087		0.182374	0.200485
								0.026	9.5	0.0095	0.026	17	0.140419		8.9	0.0089	0.026	21	0.147605		0.00718658				0.032	0.21488	0.192717		0.189135	0.208521
								0.027	9.5	0.0095	0.027	15	0.148678		9.1	0.0091	0.027	15	0.154936		0.00625805				0.033	0.222508	0.199284		0.195831	0.216458
								0.028	9.6	0.0096	0.028	16	0.157489		9.2	0.0092	0.028	17	0.163245		0.00575637				0.034	0.230047	0.205789		0.202462	0.224298
								0.029	9.6	0.0096	0.029	13	0.164648		9.2	0.0092	0.029	21	0.173509		0.00886171				0.035	0.237498	0.212233		0.209029	0.232042
								0.03	9.7	0.0097	0.03	15	0.172907		9.2	0.0092	0.03	13	0.179863		0.00695566				0.036	0.244861	0.218616		0.215533	0.239691
								0.031	9.9	0.0099	0.031	11	0.178965		9.3	0.0093	0.031	22	0.190616		0.0116511				0.037	0.252139	0.224938		0.221974	0.247247
								0.032	10	0.01	0.032	8	0.18337		9.3	0.0093	0.032	18	0.199413		0.0160434				0.038	0.259332	0.231201		0.228353	0.25471
								0.033	10.1	0.0101	0.033	21	0.194934		9.4	0.0094	0.033	16	0.207234		0.0122997				0.039	0.26644	0.237406		0.234671	0.262081
								0.034	10.1	0.0101	0.034	15	0.203194		9.5	0.0095	0.034	13	0.213587		0.0103937				0.04	0.273467	0.243551		0.240927	0.269363
								0.035	10.3	0.0103	0.035	14	0.210903		9.5	0.0095	0.035	15	0.220919		0.0100158				0.041	0.280411	0.249639		0.247124	0.276557
								0.036	10.4	0.0104	0.036	7	0.214758		10.1	0.0101	0.036	15	0.22825		0.0134925				0.042	0.287275	0.25567		0.253261	0.283662
								0.037	10.5	0.0105	0.037	12	0.221366		10.1	0.0101	0.037	13	0.234604		0.0132385				0.043	0.294059	0.261644		0.259339	0.290682
								0.038	10.5	0.0105	0.038	13	0.228524		10.2	0.0102	0.038	20	0.244379		0.015855				0.044	0.300764	0.267562		0.265359	0.297616
								0.039	10.7	0.0107	0.039	11	0.234581		10.2	0.0102	0.039	21	0.254643		0.0200617				0.045	0.307392	0.273424		0.271322	0.304466
								0.04	10.8	0.0108	0.04	10	0.240088		10.3	0.0103	0.04	18	0.263441		0.0233528				0.046	0.313942	0.279232		0.277227	0.311232
								0.041	10.8	0.0108	0.041	9	0.245044		10.3	0.0103	0.041	13	0.269795		0.0247507				0.047	0.320418	0.284985		0.283075	0.317917
								0.042	11	0.011	0.042	20	0.256057		10.4	0.0104	0.042	28	0.28348		0.0274227				0.048	0.326818	0.290684		0.288868	0.324521
								0.043	11	0.011	0.043	16	0.264868		10.4	0.0104	0.043	13	0.289834		0.024966				0.049	0.333144	0.29633		0.294605	0.331046
								0.044	11	0.011	0.044	8	0.269273		10.5	0.0105	0.044	16	0.297654		0.0283808				0.05	0.339398	0.301923		0.300287	0.337491
								0.045	11.1	0.0111	0.045	10	0.27478		10.6	0.0106	0.045	20	0.307429		0.0326494				0.051	0.345579	0.307464		0.305915	0.343859
								0.046	11.2	0.0112	0.046	12	0.281388		10.6	0.0106	0.046	12	0.313294		0.0319066				0.052	0.35169	0.312953		0.311489	0.35015
								0.047	11.2	0.0112	0.047	13	0.288546		10.8	0.0108	0.047	12	0.319159		0.0306131				0.053	0.35773	0.31839		0.31701	0.356366
								0.048	11.3	0.0113	0.048	10	0.294053		10.8	0.0108	0.048	13	0.325513		0.0314603				0.054	0.363701	0.323777		0.322479	0.362507
								0.049	11.3	0.0113	0.049	16	0.302863		10.9	0.0109	0.049	15	0.332845		0.0299811				0.055	0.369603	0.329114		0.327895	0.368574
								0.05	11.3	0.0113	0.05	5	0.305617		11	0.011	0.05	16	0.340665		0.035048				0.056	0.375438	0.334401		0.33326	0.374569
								0.051	11.4	0.0114	0.051	16	0.314427		11	0.011	0.051	15	0.347996		0.0335688				0.057	0.381206	0.339639		0.338574	0.380492
								0.052	11.5	0.0115	0.052	11	0.320485		11.1	0.0111	0.052	13	0.35435		0.0338654				0.058	0.386908	0.344828		0.343837	0.386344
								0.053	11.6	0.0116	0.053	7	0.324339		11.1	0.0111	0.053	13	0.360704		0.0363646				0.059	0.392545	0.349969		0.349051	0.392126
								0.054	11.6	0.0116	0.054	8	0.328744		11.1	0.0111	0.054	7	0.364125		0.0353806				0.06	0.398117	0.355062		0.354214	0.397839
								0.055	12	0.012	0.055	8	0.33315		11.3	0.0113	0.055	13	0.370479		0.0373292				0.061	0.403627	0.360108		0.359329	0.403484
								0.056	12	0.012	0.056	13	0.340308		11.4	0.0114	0.056	11	0.375855		0.035547				0.062	0.409073	0.365107		0.364396	0.409062
								0.057	12.2	0.0122	0.057	13	0.347467		11.4	0.0114	0.057	8	0.379765		0.0322984				0.063	0.414457	0.370059		0.369414	0.414574
								0.058	12.4	0.0124	0.058	13	0.354626		11.4	0.0114	0.058	10	0.384653		0.0300274				0.064	0.419781	0.374966		0.374385	0.420021
								0.059	12.4	0.0124	0.059	11	0.360683		11.5	0.0115	0.059	10	0.389541		0.0288577				0.065	0.425044	0.379827		0.379309	0.425402
								0.06	12.4	0.0124	0.06	4	0.362885		11.5	0.0115	0.06	14	0.396383		0.0334977				0.066	0.430247	0.384643		0.384186	0.430721
								0.061	12.5	0.0125	0.061	2	0.363987		11.5	0.0115	0.061	10	0.401271		0.037284				0.067	0.435392	0.389415		0.389017	0.435976
								0.062	12.7	0.0127	0.062	10	0.369493		11.6	0.0116	0.062	8	0.405181		0.0356874				0.068	0.440478	0.394142		0.393803	0.441169
								0.063	12.7	0.0127	0.063	15	0.377753		11.6	0.0116	0.063	8	0.409091		0.0313376				0.069	0.445507	0.398826		0.398543	0.446301
								0.064	12.8	0.0128	0.064	7	0.381608		11.7	0.0117	0.064	8	0.413001		0.031393				0.07	0.450479	0.403467		0.403239	0.451373
								0.065	12.8	0.0128	0.065	12	0.388216		11.8	0.0118	0.065	18	0.421799		0.0335828				0.071	0.455395	0.408064		0.407891	0.456385
								0.066	12.9	0.0129	0.066	13	0.395374		11.9	0.0119	0.066	14	0.428641		0.0332668				0.072	0.460256	0.41262		0.412499	0.461338
								0.067	12.9	0.0129	0.067	8	0.39978		12	0.012	0.067	13	0.434995		0.0352154				0.073	0.465062	0.417133		0.417063	0.466233
								0.068	13	0.013	0.068	7	0.403634		12.1	0.0121	0.068	12	0.44086		0.0372259				0.074	0.469815	0.421605		0.421585	0.471071
								0.069	13.1	0.0131	0.069	6	0.406938		12.1	0.0121	0.069	6	0.443793		0.0368544				0.075	0.474514	0.426036		0.426064	0.475852
								0.07	13.4	0.0134	0.07	11	0.412996		12.1	0.0121	0.07	9	0.448192		0.035196				0.076	0.47916	0.430426		0.430501	0.480577
								0.071	13.6	0.0136	0.071	11	0.419053		12.2	0.0122	0.071	12	0.454057		0.0350038				0.077	0.483755	0.434776		0.434897	0.485248
								0.072	13.6	0.0136	0.072	7	0.422907		12.2	0.0122	0.072	10	0.458944		0.0360368				0.078	0.488298	0.439086		0.439251	0.489864
								0.073	13.7	0.0137	0.073	7	0.426762		12.3	0.0123	0.073	10	0.463832		0.0370698				0.079	0.49279	0.443356		0.443565	0.494426
								0.074	13.8	0.0138	0.074	8	0.431167		12.3	0.0123	0.074	12	0.469697		0.0385296				0.08	0.497233	0.447587		0.447838	0.498935
								0.075	14	0.014	0.075	11	0.437225		12.6	0.0126	0.075	12	0.475562		0.0383374				0.081	0.501626	0.45178		0.452072	0.503392
								0.076	14	0.014	0.076	8	0.44163		12.7	0.0127	0.076	6	0.478495		0.0368647				0.082	0.50597	0.455934		0.456265	0.507797
								0.077	14.1	0.0141	0.077	11	0.447687		12.8	0.0128	0.077	9	0.482893		0.0352062				0.083	0.510266	0.46005		0.46042	0.512152
								0.078	14.3	0.0143	0.078	9	0.452643		12.8	0.0128	0.078	10	0.487781		0.0351379				0.084	0.514515	0.464128		0.464536	0.516456
								0.079	14.5	0.0145	0.079	12	0.459251		12.8	0.0128	0.079	11	0.493157		0.0339063				0.085	0.518716	0.468169		0.468614	0.52071
								0.08	14.5	0.0145	0.08	3	0.460903		12.9	0.0129	0.08	11	0.498534		0.0376306				0.086	0.522871	0.472174		0.472654	0.524916
								0.081	14.5	0.0145	0.081	12	0.467511		12.9	0.0129	0.081	5	0.500978		0.0334665				0.087	0.52698	0.476142		0.476656	0.529073
								0.082	14.5	0.0145	0.082	11	0.473568		12.9	0.0129	0.082	14	0.50782		0.0342519				0.088	0.531044	0.480073		0.480621	0.533182
								0.083	14.6	0.0146	0.083	11	0.479626		12.9	0.0129	0.083	9	0.512219		0.0325934				0.089	0.535063	0.483969		0.484549	0.537245
								0.084	14.7	0.0147	0.084	7	0.48348		12.9	0.0129	0.084	17	0.520528		0.0370477				0.09	0.539038	0.48783		0.488441	0.541261
								0.085	14.7	0.0147	0.085	7	0.487335		13.1	0.0131	0.085	10	0.525415		0.0380806				0.091	0.542969	0.491655		0.492296	0.545231
								0.086	14.8	0.0148	0.086	6	0.490639		13.1	0.0131	0.086	9	0.529814		0.0391755				0.092	0.546857	0.495446		0.496116	0.549155
								0.087	14.8	0.0148	0.087	5	0.493392		13.3	0.0133	0.087	15	0.537146		0.0437536				0.093	0.550703	0.499202		0.499901	0.553035
								0.088	14.9	0.0149	0.088	6	0.496696		13.4	0.0134	0.088	5	0.539589		0.0428934				0.094	0.554506	0.502924		0.50365	0.556871
								0.089	15	0.015	0.089	4	0.498899		13.4	0.0134	0.089	7	0.543011		0.0441121				0.095	0.558268	0.506613		0.507365	0.560663
								0.09	15.3	0.0153	0.09	5	0.501652		13.5	0.0135	0.09	10	0.547898		0.0462464				0.096	0.561989	0.510268		0.511046	0.564413
								0.091	15.3	0.0153	0.091	5	0.504405		13.5	0.0135	0.091	9	0.552297		0.0478919				0.097	0.565669	0.51389		0.514693	0.568119
								0.092	15.3	0.0153	0.092	6	0.507709		13.5	0.0135	0.092	10	0.557185		0.0494755				0.098	0.56931	0.517479		0.518306	0.571784
								0.093	15.5	0.0155	0.093	7	0.511564		13.7	0.0137	0.093	5	0.559629		0.0480647				0.099	0.57291	0.521036		0.521886	0.575408
								0.094	15.5	0.0155	0.094	10	0.51707		13.8	0.0138	0.094	9	0.564027		0.0469569				0.1	0.576472	0.524561		0.525433	0.578991
								0.095	15.8	0.0158	0.095	3	0.518722		13.9	0.0139	0.095	9	0.568426		0.0497037				0.101	0.579995	0.528054		0.528948	0.582533
								0.096	15.9	0.0159	0.096	2	0.519824		14	0.014	0.096	7	0.571848		0.0520237				0.102	0.583481	0.531516		0.53243	0.586036
								0.097	15.9	0.0159	0.097	5	0.522577		14	0.014	0.097	6	0.57478		0.052203				0.103	0.586928	0.534946		0.53588	0.5895
								0.098	16	0.016	0.098	4	0.52478		14.2	0.0142	0.098	7	0.578201		0.0534216				0.104	0.590338	0.538346		0.539299	0.592924
								0.099	16	0.016	0.099	9	0.529736		14.3	0.0143	0.099	7	0.581623		0.051887				0.105	0.593712	0.541715		0.542686	0.596311
								0.1	16.2	0.0162	0.1	5	0.532489		14.3	0.0143	0.1	9	0.586022		0.0535325				0.106	0.597049	0.545054		0.546042	0.599659
								0.101	16.3	0.0163	0.101	1	0.53304		14.4	0.0144	0.101	5	0.588465		0.0554257				0.107	0.600351	0.548363		0.549368	0.602971
								0.102	16.4	0.0164	0.102	4	0.535242		14.5	0.0145	0.102	6	0.591398		0.0561556				0.108	0.603617	0.551642		0.552663	0.606245
								0.103	16.5	0.0165	0.103	4	0.537445		14.6	0.0146	0.103	13	0.597752		0.0603068				0.109	0.606848	0.554892		0.555928	0.609484
								0.104	16.5	0.0165	0.104	12	0.544053		14.6	0.0146	0.104	3	0.599218		0.0551651				0.11	0.610045	0.558112		0.559164	0.612686
								0.105	16.6	0.0166	0.105	2	0.545154		14.6	0.0146	0.105	9	0.603617		0.0584626				0.111	0.613207	0.561304		0.56237	0.615853
								0.106	16.7	0.0167	0.106	6	0.548458		14.7	0.0147	0.106	6	0.606549		0.0580912				0.112	0.616336	0.564468		0.565547	0.618985
								0.107	16.7	0.0167	0.107	5	0.551211		14.7	0.0147	0.107	4	0.608504		0.0572929				0.113	0.619432	0.567603		0.568695	0.622082
								0.108	16.7	0.0167	0.108	6	0.554515		14.8	0.0148	0.108	12	0.61437		0.0598541				0.114	0.622495	0.570711		0.571814	0.625146
								0.109	16.8	0.0168	0.109	3	0.556167		14.9	0.0149	0.109	3	0.615836		0.0596684				0.115	0.625525	0.57379		0.574905	0.628176
								0.11	16.8	0.0168	0.11	5	0.558921		14.9	0.0149	0.11	7	0.619257		0.0603364				0.116	0.628523	0.576842		0.577969	0.631172
								0.111	16.9	0.0169	0.111	8	0.563326		14.9	0.0149	0.111	9	0.623656		0.0603299				0.117	0.63149	0.579868		0.581004	0.634136
								0.112	16.9	0.0169	0.112	11	0.569383		15.2	0.0152	0.112	3	0.625122		0.0557389				0.118	0.634425	0.582866		0.584012	0.637067
								0.113	17	0.017	0.113	3	0.571035		15.3	0.0153	0.113	1	0.625611		0.0545757				0.119	0.637329	0.585837		0.586993	0.639967
								0.114	17.1	0.0171	0.114	7	0.57489		15.4	0.0154	0.114	2	0.626588		0.0516986				0.12	0.640203	0.588783		0.589947	0.642835
								0.115	17.1	0.0171	0.115	2	0.575991		15.4	0.0154	0.115	7	0.63001		0.0540186				0.121	0.643046	0.591702		0.592874	0.645671
								0.116	17.2	0.0172	0.116	3	0.577643		15.4	0.0154	0.116	9	0.634409		0.0567654				0.122	0.64586	0.594595		0.595775	0.648477
								0.117	17.3	0.0173	0.117	3	0.579295		15.5	0.0155	0.117	8	0.638319		0.0590235				0.123	0.648644	0.597463		0.59865	0.651253
								0.118	17.4	0.0174	0.118	2	0.580396		15.5	0.0155	0.118	7	0.64174		0.0613435				0.124	0.651399	0.600306		0.601499	0.653999
								0.119	17.4	0.0174	0.119	5	0.58315		15.5	0.0155	0.119	3	0.643206		0.0600565				0.125	0.654126	0.603123		0.604322	0.656715
								0.12	17.4	0.0174	0.12	9	0.588106		15.5	0.0155	0.12	3	0.644673		0.0565668				0.126	0.656824	0.605916		0.60712	0.659402
								0.121	17.4	0.0174	0.121	7	0.59196		15.6	0.0156	0.121	6	0.647605		0.0556447				0.127	0.659494	0.608683		0.609893	0.66206
								0.122	17.4	0.0174	0.122	5	0.594714		15.6	0.0156	0.122	5	0.650049		0.0553352				0.128	0.662136	0.611427		0.612641	0.664689
								0.123	17.5	0.0175	0.123	6	0.598018		15.6	0.0156	0.123	7	0.65347		0.0554526				0.129	0.664751	0.614147		0.615365	0.66729
								0.124	17.6	0.0176	0.124	9	0.602974		15.7	0.0157	0.124	7	0.656891		0.0539179				0.13	0.667339	0.616842		0.618064	0.669864
								0.125	17.6	0.0176	0.125	4	0.605176		15.8	0.0158	0.125	5	0.659335		0.0541591				0.131	0.6699	0.619514		0.620739	0.67241
								0.126	17.8	0.0178	0.126	8	0.609581		15.8	0.0158	0.126	1	0.659824		0.0502425				0.132	0.672434	0.622163		0.62339	0.674929
								0.127	17.8	0.0178	0.127	4	0.611784		15.8	0.0158	0.127	7	0.663245		0.0514612				0.133	0.674943	0.624788		0.626018	0.677421
								0.128	17.8	0.0178	0.128	3	0.613436		15.8	0.0158	0.128	3	0.664712		0.0512755				0.134	0.677426	0.62739		0.628622	0.679887
								0.129	17.9	0.0179	0.129	1	0.613987		15.9	0.0159	0.129	8	0.668622		0.0546349				0.135	0.679883	0.62997		0.631203	0.682327
								0.13	17.9	0.0179	0.13	4	0.616189		15.9	0.0159	0.13	2	0.669599		0.0534098				0.136	0.682315	0.632527		0.633762	0.684741
								0.131	18	0.018	0.131	4	0.618392		16	0.016	0.131	6	0.672532		0.0541397				0.137	0.684723	0.635062		0.636297	0.68713
								0.132	18.1	0.0181	0.132	4	0.620595		16	0.016	0.132	6	0.675464		0.0548696				0.138	0.687105	0.637574		0.63881	0.689494
								0.133	18.1	0.0181	0.133	8	0.625		16	0.016	0.133	5	0.677908		0.0529081				0.139	0.689464	0.640065		0.641301	0.691832
								0.134	18.2	0.0182	0.134	4	0.627203		16.1	0.0161	0.134	10	0.682796		0.0555931				0.14	0.691798	0.642534		0.64377	0.694147
								0.135	18.2	0.0182	0.135	7	0.631057		16.1	0.0161	0.135	2	0.683773		0.0527159				0.141	0.694109	0.644982		0.646217	0.696437
								0.136	18.2	0.0182	0.136	1	0.631608		16.2	0.0162	0.136	5	0.686217		0.0546091				0.142	0.696396	0.647409		0.648643	0.698703
								0.137	18.2	0.0182	0.137	2	0.632709		16.2	0.0162	0.137	9	0.690616		0.0579066				0.143	0.698661	0.649814		0.651047	0.700946
								0.138	18.3	0.0183	0.138	5	0.635463		16.2	0.0162	0.138	4	0.692571		0.0571083				0.144	0.700902	0.652199		0.65343	0.703165
								0.139	18.5	0.0185	0.139	5	0.638216		16.2	0.0162	0.139	3	0.694037		0.0558213				0.145	0.703121	0.654563		0.655792	0.705361
								0.14	18.5	0.0185	0.14	8	0.642621		16.4	0.0164	0.14	5	0.696481		0.0538598				0.146	0.705317	0.656906		0.658133	0.707535
								0.141	18.5	0.0185	0.141	3	0.644273		16.5	0.0165	0.141	5	0.698925		0.0546516				0.147	0.707492	0.659229		0.660454	0.709687
								0.142	18.5	0.0185	0.142	5	0.647026		16.6	0.0166	0.142	4	0.70088		0.0538533				0.148	0.709644	0.661533		0.662754	0.711816
								0.143	18.6	0.0186	0.143	7	0.650881		16.7	0.0167	0.143	7	0.704301		0.05342				0.149	0.711776	0.663816		0.665034	0.713923
								0.144	18.6	0.0186	0.144	6	0.654185		16.8	0.0168	0.144	7	0.707722		0.0535374				0.15	0.713885	0.66608		0.667295	0.716009
								0.145	18.6	0.0186	0.145	1	0.654736		16.9	0.0169	0.145	6	0.710655		0.0559193				0.151	0.715974	0.668324		0.669535	0.718073
								0.146	18.6	0.0186	0.146	4	0.656938		17	0.017	0.146	4	0.71261		0.0556716				0.152	0.718042	0.670549		0.671756	0.720116
								0.147	18.7	0.0187	0.147	6	0.660242		17.1	0.0171	0.147	8	0.71652		0.0562777				0.153	0.72009	0.672755		0.673958	0.722139
								0.148	18.7	0.0187	0.148	1	0.660793		17.2	0.0172	0.148	4	0.718475		0.0576821				0.154	0.722117	0.674942		0.676141	0.724141
								0.149	18.8	0.0188	0.149	5	0.663546		17.2	0.0172	0.149	5	0.720919		0.0573726				0.155	0.724124	0.677111		0.678304	0.726122
								0.15	18.8	0.0188	0.15	4	0.665749		17.2	0.0172	0.15	4	0.722874		0.057125				0.156	0.726112	0.67926		0.680449	0.728084
								0.151	18.9	0.0189	0.151	4	0.667952		17.2	0.0172	0.151	8	0.726784		0.0588324				0.157	0.728079	0.681392		0.682575	0.730026
								0.152	18.9	0.0189	0.152	4	0.670154		17.3	0.0173	0.152	2	0.727761		0.0576073				0.158	0.730028	0.683505		0.684683	0.731948
								0.153	18.9	0.0189	0.153	6	0.673458		17.3	0.0173	0.153	2	0.728739		0.0552809				0.159	0.731957	0.6856		0.686773	0.733851
								0.154	19	0.019	0.154	2	0.674559		17.5	0.0175	0.154	2	0.729717		0.055157				0.16	0.733868	0.687678		0.688844	0.735735
								0.155	19.5	0.0195	0.155	5	0.677313		17.5	0.0175	0.155	2	0.730694		0.0533813				0.161	0.735759	0.689737		0.690898	0.7376
								0.156	19.6	0.0196	0.156	6	0.680617		17.5	0.0175	0.156	6	0.733627		0.0530098				0.162	0.737633	0.69178		0.692934	0.739446
								0.157	19.6	0.0196	0.157	4	0.682819		17.6	0.0176	0.157	1	0.734115		0.051296				0.163	0.739488	0.693804		0.694952	0.741274
								0.158	19.8	0.0198	0.158	1	0.68337		17.6	0.0176	0.158	7	0.737537		0.0541666				0.164	0.741325	0.695812		0.696953	0.743084
								0.159	19.8	0.0198	0.159	5	0.686123		17.6	0.0176	0.159	2	0.738514		0.0523908				0.165	0.743144	0.697803		0.698937	0.744876
								0.16	19.9	0.0199	0.16	3	0.687775		17.8	0.0178	0.16	2	0.739492		0.0517164				0.166	0.744946	0.699777		0.700904	0.746651
								0.161	19.9	0.0199	0.161	4	0.689978		17.8	0.0178	0.161	2	0.740469		0.0504912				0.167	0.74673	0.701734		0.702854	0.748407
								0.162	19.9	0.0199	0.162	2	0.691079		18	0.018	0.162	4	0.742424		0.0513449				0.168	0.748497	0.703675		0.704788	0.750147
								0.163	20.1	0.0201	0.163	2	0.692181		18	0.018	0.163	1	0.742913		0.0507324				0.169	0.750247	0.705599		0.706705	0.751869
								0.164	20.3	0.0203	0.164	3	0.693833		18.1	0.0181	0.164	3	0.744379		0.0505467				0.17	0.75198	0.707508		0.708605	0.753575
								0.165	20.4	0.0204	0.165	1	0.694383		18.2	0.0182	0.165	5	0.746823		0.0524398				0.171	0.753697	0.7094		0.710489	0.755264
								0.166	20.4	0.0204	0.166	3	0.696035		18.3	0.0183	0.166	3	0.748289		0.0522541				0.172	0.755397	0.711276		0.712358	0.756936
								0.167	20.7	0.0207	0.167	4	0.698238		18.3	0.0183	0.167	1	0.748778		0.0505402				0.173	0.757081	0.713137		0.71421	0.758592
								0.168	20.7	0.0207	0.168	4	0.700441		18.4	0.0184	0.168	5	0.751222		0.0507814				0.174	0.758749	0.714981		0.716047	0.760232
								0.169	20.8	0.0208	0.169	2	0.701542		18.5	0.0185	0.169	4	0.753177		0.0516351				0.175	0.760401	0.716811		0.717868	0.761856
								0.17	20.8	0.0208	0.17	2	0.702643		18.6	0.0186	0.17	1	0.753666		0.0510225				0.176	0.762038	0.718625		0.719674	0.763465
								0.171	20.8	0.0208	0.171	2	0.703744		18.6	0.0186	0.171	2	0.754643		0.0508987				0.177	0.763659	0.720424		0.721464	0.765058
								0.172	20.9	0.0209	0.172	2	0.704846		18.7	0.0187	0.172	1	0.755132		0.0502861				0.178	0.765264	0.722208		0.723239	0.766636
								0.173	20.9	0.0209	0.173	4	0.707048		18.7	0.0187	0.173	4	0.757087		0.0500385				0.179	0.766855	0.723978		0.725	0.768198
								0.174	21	0.021	0.174	5	0.709802		18.8	0.0188	0.174	6	0.76002		0.0502178				0.18	0.768431	0.725732		0.726745	0.769746
								0.175	21	0.021	0.175	1	0.710352		18.8	0.0188	0.175	4	0.761975		0.0516222				0.181	0.769991	0.727472		0.728476	0.771279
								0.176	21.1	0.0211	0.176	4	0.712555		18.9	0.0189	0.176	1	0.762463		0.0499083				0.182	0.771538	0.729198		0.730192	0.772797
								0.177	21.1	0.0211	0.177	4	0.714758		18.9	0.0189	0.177	1	0.762952		0.0481944				0.183	0.77307	0.730909		0.731894	0.774301
								0.178	21.1	0.0211	0.178	6	0.718062		19.2	0.0192	0.178	2	0.76393		0.0458679				0.184	0.774587	0.732606		0.733582	0.775791
								0.179	21.2	0.0212	0.179	4	0.720264		19.2	0.0192	0.179	3	0.765396		0.0451316				0.185	0.77609	0.734289		0.735255	0.777266
								0.18	21.2	0.0212	0.18	0	0.720264		19.3	0.0193	0.18	7	0.768817		0.0485529				0.186	0.77758	0.735958		0.736915	0.778728
								0.181	21.2	0.0212	0.181	0	0.720264		19.4	0.0194	0.181	4	0.770772		0.0505079				0.187	0.779056	0.737613		0.738561	0.780176
								0.182	21.3	0.0213	0.182	3	0.721916		19.6	0.0196	0.182	2	0.77175		0.0498335				0.188	0.780518	0.739255		0.740193	0.78161
								0.183	21.4	0.0214	0.183	1	0.722467		19.6	0.0196	0.183	0	0.77175		0.0492828				0.189	0.781966	0.740884		0.741811	0.783031
								0.184	21.4	0.0214	0.184	1	0.723018		19.7	0.0197	0.184	5	0.774194		0.0511759				0.19	0.783401	0.742498		0.743416	0.784439
								0.185	21.4	0.0214	0.185	0	0.723018		19.8	0.0198	0.185	3	0.77566		0.0526422				0.191	0.784824	0.7441		0.745008	0.785834
								0.186	21.5	0.0215	0.186	4	0.72522		19.9	0.0199	0.186	2	0.776637		0.0514171				0.192	0.786233	0.745689		0.746586	0.787216
								0.187	21.5	0.0215	0.187	4	0.727423		19.9	0.0199	0.187	5	0.779081		0.0516582				0.193	0.787629	0.747264		0.748151	0.788585
								0.188	21.7	0.0217	0.188	3	0.729075		19.9	0.0199	0.188	3	0.780547		0.0514725				0.194	0.789012	0.748827		0.749704	0.789941
								0.189	21.8	0.0218	0.189	3	0.730727		19.9	0.0199	0.189	5	0.782991		0.0522643				0.195	0.790383	0.750377		0.751244	0.791285
								0.19	21.9	0.0219	0.19	5	0.73348		19.9	0.0199	0.19	2	0.783969		0.0504885				0.196	0.791742	0.751914		0.75277	0.792616
								0.191	21.9	0.0219	0.191	4	0.735683		19.9	0.0199	0.191	1	0.784457		0.0487747				0.197	0.793088	0.753439		0.754285	0.793936
								0.192	22.1	0.0221	0.192	3	0.737335		20	0.02	0.192	1	0.784946		0.0476114				0.198	0.794422	0.754951		0.755787	0.795243
								0.193	22.1	0.0221	0.193	3	0.738987		20	0.02	0.193	2	0.785924		0.046937				0.199	0.795744	0.756451		0.757276	0.796538
								0.194	22.2	0.0222	0.194	3	0.740639		20.1	0.0201	0.194	5	0.788368		0.0477288				0.2	0.797054	0.757939		0.758754	0.797822
								0.195	22.3	0.0223	0.195	4	0.742841		20.2	0.0202	0.195	3	0.789834		0.0469924				0.201	0.798352	0.759415		0.760219	0.799094
								0.196	22.4	0.0224	0.196	1	0.743392		20.3	0.0203	0.196	1	0.790323		0.0469305				0.202	0.799639	0.760879		0.761673	0.800354
								0.197	22.4	0.0224	0.197	3	0.745044		20.3	0.0203	0.197	0	0.790323		0.0452785				0.203	0.800914	0.762331		0.763114	0.801604
								0.198	22.5	0.0225	0.198	2	0.746145		20.3	0.0203	0.198	1	0.790811		0.044666				0.204	0.802178	0.763771		0.764544	0.802842
								0.199	22.7	0.0227	0.199	2	0.747247		20.3	0.0203	0.199	2	0.791789		0.0445422				0.205	0.80343	0.7652		0.765962	0.804068
								0.2	22.8	0.0228	0.2	1	0.747797		20.4	0.0204	0.2	4	0.793744		0.0459465				0.206	0.804672	0.766618		0.767369	0.805284
								0.201	22.8	0.0228	0.201	3	0.749449		20.4	0.0204	0.201	6	0.796676		0.0472271				0.207	0.805903	0.768023		0.768764	0.806489
								0.202	22.9	0.0229	0.202	3	0.751101		20.5	0.0205	0.202	0	0.796676		0.0455751				0.208	0.807122	0.769418		0.770148	0.807684
								0.203	22.9	0.0229	0.203	2	0.752203		20.5	0.0205	0.203	0	0.796676		0.0444738				0.209	0.808331	0.770802		0.771521	0.808867
								0.204	22.9	0.0229	0.204	2	0.753304		20.5	0.0205	0.204	3	0.798143		0.0448388				0.21	0.809529	0.772174		0.772882	0.810041
								0.205	23	0.023	0.205	2	0.754405		20.6	0.0206	0.205	3	0.799609		0.0452037				0.211	0.810717	0.773536		0.774233	0.811203
								0.206	23	0.023	0.206	1	0.754956		20.6	0.0206	0.206	3	0.801075		0.0461193				0.212	0.811895	0.774886		0.775573	0.812356
								0.207	23	0.023	0.207	0	0.754956		20.6	0.0206	0.207	3	0.802542		0.0475856				0.213	0.813062	0.776226		0.776902	0.813499
								0.208	23.3	0.0233	0.208	2	0.756057		20.7	0.0207	0.208	5	0.804985		0.0489281				0.214	0.814219	0.777555		0.77822	0.814631
								0.209	23.3	0.0233	0.209	3	0.757709		20.7	0.0207	0.209	5	0.807429		0.0497199				0.215	0.815366	0.778874		0.779528	0.815754
								0.21	23.5	0.0235	0.21	3	0.759361		20.9	0.0209	0.21	4	0.809384		0.0500229				0.216	0.816503	0.780182		0.780825	0.816867
								0.211	23.5	0.0235	0.211	2	0.760463		20.9	0.0209	0.211	1	0.809873		0.0494104				0.217	0.81763	0.78148		0.782112	0.81797
								0.212	23.6	0.0236	0.212	1	0.761013		21	0.021	0.212	1	0.810362		0.0493485				0.218	0.818747	0.782768		0.783389	0.819064
								0.213	23.6	0.0236	0.213	2	0.762115		21	0.021	0.213	1	0.81085		0.0487359				0.219	0.819855	0.784045		0.784656	0.820148
								0.214	23.6	0.0236	0.214	2	0.763216		21.1	0.0211	0.214	2	0.811828		0.0486121				0.22	0.820954	0.785312		0.785912	0.821223
								0.215	23.8	0.0238	0.215	2	0.764317		21.1	0.0211	0.215	3	0.813294		0.0489771				0.221	0.822043	0.78657		0.787159	0.822289
								0.216	23.8	0.0238	0.216	3	0.765969		21.1	0.0211	0.216	0	0.813294		0.0473251				0.222	0.823122	0.787817		0.788395	0.823346
								0.217	23.8	0.0238	0.217	2	0.76707		21.3	0.0213	0.217	1	0.813783		0.0467125				0.223	0.824193	0.789055		0.789622	0.824393
								0.218	23.8	0.0238	0.218	2	0.768172		21.3	0.0213	0.218	1	0.814272		0.0460999				0.224	0.825254	0.790283		0.790839	0.825432
								0.219	23.9	0.0239	0.219	4	0.770374		21.5	0.0215	0.219	5	0.816716		0.0463411				0.225	0.826307	0.791501		0.792047	0.826462
								0.22	24	0.024	0.22	5	0.773128		21.5	0.0215	0.22	3	0.818182		0.0450541				0.226	0.82735	0.79271		0.793245	0.827483
								0.221	24	0.024	0.221	4	0.77533		21.5	0.0215	0.221	3	0.819648		0.0443177				0.227	0.828385	0.793909		0.794433	0.828496
								0.222	24.1	0.0241	0.222	0	0.77533		21.5	0.0215	0.222	0	0.819648		0.0443177				0.228	0.829411	0.795099		0.795613	0.8295
								0.223	24.1	0.0241	0.223	7	0.779185		21.6	0.0216	0.223	2	0.820626		0.0414406				0.229	0.830428	0.79628		0.796783	0.830496
								0.224	24.1	0.0241	0.224	3	0.780837		21.6	0.0216	0.224	2	0.821603		0.0407661				0.23	0.831437	0.797452		0.797944	0.831483
								0.225	24.3	0.0243	0.225	3	0.782489		21.6	0.0216	0.225	2	0.822581		0.0400917				0.231	0.832438	0.798614		0.799096	0.832462
								0.226	24.3	0.0243	0.226	6	0.785793		21.7	0.0217	0.226	4	0.824536		0.0387427				0.232	0.83343	0.799768		0.800238	0.833433
								0.227	24.4	0.0244	0.227	2	0.786894		21.7	0.0217	0.227	4	0.826491		0.0395964				0.233	0.834414	0.800912		0.801372	0.834396
								0.228	24.6	0.0246	0.228	3	0.788546		21.8	0.0218	0.228	0	0.826491		0.0379445				0.234	0.835389	0.802048		0.802497	0.835351
								0.229	24.6	0.0246	0.229	5	0.7913		21.8	0.0218	0.229	1	0.826979		0.0356799				0.235	0.836357	0.803175		0.803614	0.836298
								0.23	24.7	0.0247	0.23	5	0.794053		21.8	0.0218	0.23	3	0.828446		0.0343929				0.236	0.837317	0.804293		0.804722	0.837237
								0.231	24.8	0.0248	0.231	3	0.795705		22	0.022	0.231	1	0.828935		0.0332297				0.237	0.838269	0.805403		0.805821	0.838169
								0.232	24.8	0.0248	0.232	0	0.795705		22.1	0.0221	0.232	2	0.829912		0.0342072				0.238	0.839213	0.806504		0.806911	0.839093
								0.233	24.8	0.0248	0.233	1	0.796256		22.2	0.0222	0.233	2	0.83089		0.034634				0.239	0.840149	0.807597		0.807994	0.84001
								0.234	24.9	0.0249	0.234	3	0.797907		22.3	0.0223	0.234	3	0.832356		0.0344483				0.24	0.841077	0.808682		0.809068	0.840919
								0.235	24.9	0.0249	0.235	1	0.798458		22.3	0.0223	0.235	3	0.833822		0.0353639				0.241	0.841998	0.809758		0.810133	0.84182
								0.236	24.9	0.0249	0.236	2	0.799559		22.4	0.0224	0.236	0	0.833822		0.0342626				0.242	0.842912	0.810825		0.811191	0.842715
								0.237	25	0.025	0.237	1	0.80011		22.5	0.0225	0.237	2	0.8348		0.0346895				0.243	0.843818	0.811885		0.81224	0.843602
								0.238	25	0.025	0.238	1	0.800661		22.6	0.0226	0.238	3	0.836266		0.0356051				0.244	0.844717	0.812937		0.813282	0.844482
								0.239	25.1	0.0251	0.239	0	0.800661		22.7	0.0227	0.239	3	0.837732		0.0370714				0.245	0.845609	0.813981		0.814315	0.845355
								0.24	25.2	0.0252	0.24	1	0.801211		22.8	0.0228	0.24	0	0.837732		0.0365207				0.246	0.846493	0.815016		0.815341	0.846221
								0.241	25.2	0.0252	0.241	0	0.801211		22.8	0.0228	0.241	0	0.837732		0.0365207				0.247	0.847371	0.816044		0.816358	0.84708
								0.242	25.2	0.0252	0.242	4	0.803414		22.8	0.0228	0.242	0	0.837732		0.0343181				0.248	0.848241	0.817065		0.817368	0.847932
								0.243	25.3	0.0253	0.243	2	0.804515		22.9	0.0229	0.243	1	0.838221		0.0337055				0.249	0.849104	0.818077		0.818371	0.848778
								0.244	25.3	0.0253	0.244	4	0.806718		22.9	0.0229	0.244	2	0.839198		0.0324804				0.25	0.849961	0.819082		0.819365	0.849617
								0.245	25.3	0.0253	0.245	4	0.808921		22.9	0.0229	0.245	2	0.840176		0.0312552				0.251	0.850811	0.820079		0.820353	0.850449
								0.246	25.5	0.0255	0.246	2	0.810022		22.9	0.0229	0.246	0	0.840176		0.0301539				0.252	0.851654	0.821069		0.821332	0.851275
								0.247	25.5	0.0255	0.247	2	0.811123		23	0.023	0.247	1	0.840665		0.0295414				0.253	0.85249	0.822051		0.822305	0.852094
								0.248	25.6	0.0256	0.248	2	0.812225		23.1	0.0231	0.248	3	0.842131		0.0299063				0.254	0.85332	0.823026		0.82327	0.852907
								0.249	25.6	0.0256	0.249	2	0.813326		23.1	0.0231	0.249	2	0.843109		0.0297825				0.255	0.854143	0.823994		0.824228	0.853714
								0.25	25.7	0.0257	0.25	1	0.813877		23.2	0.0232	0.25	3	0.844575		0.0306981				0.256	0.85496	0.824954		0.825179	0.854514
								0.251	25.7	0.0257	0.251	3	0.815529		23.2	0.0232	0.251	0	0.844575		0.0290461				0.257	0.85577	0.825908		0.826122	0.855308
								0.252	25.8	0.0258	0.252	4	0.817731		23.3	0.0233	0.252	2	0.845552		0.027821				0.258	0.856574	0.826854		0.827059	0.856096
								0.253	25.9	0.0259	0.253	3	0.819383		23.4	0.0234	0.253	3	0.847019		0.0276353				0.259	0.857372	0.827793		0.827988	0.856878
								0.254	26	0.026	0.254	1	0.819934		23.4	0.0234	0.254	3	0.848485		0.0285509				0.26	0.858164	0.828726		0.828911	0.857654
								0.255	26	0.026	0.255	3	0.821586		23.4	0.0234	0.255	3	0.849951		0.0283652				0.261	0.858949	0.829651		0.829827	0.858424
								0.256	26.1	0.0261	0.256	0	0.821586		23.5	0.0235	0.256	0	0.849951		0.0283652				0.262	0.859729	0.830569		0.830736	0.859189
								0.257	26.2	0.0262	0.257	3	0.823238		23.7	0.0237	0.257	1	0.85044		0.027202				0.263	0.860502	0.831481		0.831638	0.859947
								0.258	26.3	0.0263	0.258	4	0.825441		23.8	0.0238	0.258	1	0.850929		0.0254881				0.264	0.86127	0.832386		0.832534	0.8607
								0.259	26.4	0.0264	0.259	1	0.825991		23.8	0.0238	0.259	3	0.852395		0.0264037				0.265	0.862032	0.833285		0.833423	0.861447
								0.26	26.5	0.0265	0.26	0	0.825991		23.8	0.0238	0.26	2	0.853372		0.0273812				0.266	0.862788	0.834176		0.834305	0.862188
								0.261	26.6	0.0266	0.261	0	0.825991		23.8	0.0238	0.261	1	0.853861		0.02787				0.267	0.863538	0.835062		0.835181	0.862924
								0.262	26.7	0.0267	0.262	1	0.826542		23.8	0.0238	0.262	0	0.853861		0.0273193				0.268	0.864282	0.83594		0.836051	0.863654
								0.263	26.7	0.0267	0.263	4	0.828744		23.9	0.0239	0.263	2	0.854839		0.0260942				0.269	0.865021	0.836813		0.836914	0.864379
								0.264	26.7	0.0267	0.264	2	0.829846		23.9	0.0239	0.264	1	0.855327		0.0254817				0.27	0.865754	0.837679		0.837771	0.865098
								0.265	26.9	0.0269	0.265	1	0.830396		24	0.024	0.265	0	0.855327		0.024931				0.271	0.866482	0.838538		0.838622	0.865813
								0.266	26.9	0.0269	0.266	3	0.832048		24	0.024	0.266	3	0.856794		0.0247453				0.272	0.867204	0.839392		0.839466	0.866521
								0.267	26.9	0.0269	0.267	1	0.832599		24	0.024	0.267	3	0.85826		0.0256609				0.273	0.867921	0.840239		0.840305	0.867225
								0.268	26.9	0.0269	0.268	1	0.83315		24.1	0.0241	0.268	1	0.858749		0.025599				0.274	0.868632	0.84108		0.841137	0.867923
								0.269	26.9	0.0269	0.269	3	0.834802		24.2	0.0242	0.269	2	0.859726		0.0249245				0.275	0.869338	0.841915		0.841963	0.868617
								0.27	27	0.027	0.27	3	0.836454		24.3	0.0243	0.27	0	0.859726		0.0232726				0.276	0.870039	0.842744		0.842783	0.869305
								0.271	27.1	0.0271	0.271	0	0.836454		24.4	0.0244	0.271	3	0.861193		0.0247388				0.277	0.870735	0.843567		0.843598	0.869988
								0.272	27.2	0.0272	0.272	1	0.837004		24.4	0.0244	0.272	2	0.86217		0.0251657				0.278	0.871426	0.844384		0.844406	0.870667
								0.273	27.2	0.0272	0.273	2	0.838106		24.4	0.0244	0.273	0	0.86217		0.0240644				0.279	0.872111	0.845195		0.845209	0.87134
								0.274	27.2	0.0272	0.274	0	0.838106		24.5	0.0245	0.274	1	0.862659		0.0245531				0.28	0.872791	0.846001		0.846006	0.872008
								0.275	27.2	0.0272	0.275	2	0.839207		24.7	0.0247	0.275	1	0.863148		0.0239406				0.281	0.873467	0.846801		0.846797	0.872672
								0.276	27.4	0.0274	0.276	2	0.840308		24.8	0.0248	0.276	1	0.863636		0.023328				0.282	0.874137	0.847594		0.847583	0.873331
								0.277	27.4	0.0274	0.277	2	0.84141		24.8	0.0248	0.277	1	0.864125		0.0227154				0.283	0.874803	0.848383		0.848362	0.873985
								0.278	27.4	0.0274	0.278	1	0.84196		24.8	0.0248	0.278	2	0.865103		0.0231423				0.284	0.875464	0.849165		0.849137	0.874635
								0.279	27.5	0.0275	0.279	2	0.843062		24.8	0.0248	0.279	1	0.865591		0.0225297				0.285	0.87612	0.849942		0.849906	0.87528
								0.28	27.5	0.0275	0.28	3	0.844714		25	0.025	0.28	0	0.865591		0.0208777				0.286	0.876771	0.850714		0.850669	0.87592
								0.281	27.6	0.0276	0.281	1	0.845264		25	0.025	0.281	0	0.865591		0.0203271				0.287	0.877417	0.85148		0.851427	0.876556
								0.282	27.6	0.0276	0.282	0	0.845264		25.1	0.0251	0.282	3	0.867058		0.0217934				0.288	0.878059	0.852241		0.85218	0.877187
								0.283	27.7	0.0277	0.283	1	0.845815		25.1	0.0251	0.283	3	0.868524		0.022709				0.289	0.878696	0.852996		0.852927	0.877814
								0.284	27.8	0.0278	0.284	1	0.846366		25.1	0.0251	0.284	5	0.870968		0.0246021				0.29	0.879329	0.853746		0.85367	0.878436
								0.285	27.9	0.0279	0.285	2	0.847467		25.2	0.0252	0.285	2	0.871945		0.0244783				0.291	0.879957	0.854491		0.854406	0.879055
								0.286	27.9	0.0279	0.286	0	0.847467		25.2	0.0252	0.286	0	0.871945		0.0244783				0.292	0.880581	0.85523		0.855138	0.879668
								0.287	28.1	0.0281	0.287	0	0.847467		25.3	0.0253	0.287	4	0.8739		0.0264333				0.293	0.8812	0.855965		0.855865	0.880278
								0.288	28.1	0.0281	0.288	0	0.847467		25.3	0.0253	0.288	0	0.8739		0.0264333				0.294	0.881815	0.856694		0.856586	0.880883
								0.289	28.1	0.0281	0.289	1	0.848018		25.4	0.0254	0.289	2	0.874878		0.0268602				0.295	0.882425	0.857418		0.857303	0.881485
								0.29	28.3	0.0283	0.29	0	0.848018		25.5	0.0255	0.29	3	0.876344		0.0283265				0.296	0.883031	0.858137		0.858014	0.882082
								0.291	28.3	0.0283	0.291	0	0.848018		25.5	0.0255	0.291	3	0.87781		0.0297927				0.297	0.883633	0.858851		0.858721	0.882674
								0.292	28.3	0.0283	0.292	6	0.851322		25.6	0.0256	0.292	3	0.879277		0.0279551				0.298	0.884231	0.85956		0.859423	0.883263
								0.293	28.4	0.0284	0.293	2	0.852423		25.7	0.0257	0.293	0	0.879277		0.0268537				0.299	0.884825	0.860264		0.86012	0.883848
								0.294	28.6	0.0286	0.294	0	0.852423		25.8	0.0258	0.294	1	0.879765		0.0273425				0.3	0.885414	0.860964		0.860812	0.884429
								0.295	28.6	0.0286	0.295	1	0.852974		25.9	0.0259	0.295	1	0.880254		0.0272806				0.301	0.885999	0.861658		0.861499	0.885006
								0.296	28.6	0.0286	0.296	1	0.853524		25.9	0.0259	0.296	2	0.881232		0.0277074				0.302	0.88658	0.862348		0.862182	0.885579
								0.297	28.7	0.0287	0.297	4	0.855727		25.9	0.0259	0.297	1	0.88172		0.0259936				0.303	0.887157	0.863033		0.862859	0.886148
								0.298	28.9	0.0289	0.298	0	0.855727		25.9	0.0259	0.298	1	0.882209		0.0264823				0.304	0.887731	0.863713		0.863533	0.886713
								0.299	29	0.029	0.299	1	0.856278		25.9	0.0259	0.299	1	0.882698		0.0264204				0.305	0.8883	0.864389		0.864201	0.887275
								0.3	29.1	0.0291	0.3	4	0.85848		26	0.026	0.3	0	0.882698		0.0242178				0.306	0.888865	0.86506		0.864865	0.887833
								0.301	29.2	0.0292	0.301	0	0.85848		26	0.026	0.301	0	0.882698		0.0242178				0.307	0.889427	0.865726		0.865525	0.888387
								0.302	29.2	0.0292	0.302	2	0.859581		26	0.026	0.302	0	0.882698		0.0231164				0.308	0.889984	0.866388		0.86618	0.888937
								0.303	29.3	0.0293	0.303	0	0.859581		26.3	0.0263	0.303	1	0.883187		0.0236052				0.309	0.890538	0.867045		0.866831	0.889484
								0.304	29.4	0.0294	0.304	2	0.860683		26.3	0.0263	0.304	2	0.884164		0.0234814				0.31	0.891088	0.867698		0.867477	0.890027
								0.305	29.5	0.0295	0.305	2	0.861784		26.3	0.0263	0.305	2	0.885142		0.0233576				0.311	0.891634	0.868346		0.868119	0.890566
								0.306	29.5	0.0295	0.306	1	0.862335		26.4	0.0264	0.306	0	0.885142		0.0228069				0.312	0.892177	0.86899		0.868756	0.891102
								0.307	29.5	0.0295	0.307	3	0.863987		26.4	0.0264	0.307	2	0.886119		0.0221325				0.313	0.892716	0.86963		0.869389	0.891635
								0.308	29.7	0.0297	0.308	3	0.865639		26.5	0.0265	0.308	0	0.886119		0.0204805				0.314	0.893251	0.870265		0.870018	0.892164
								0.309	29.7	0.0297	0.309	1	0.866189		26.6	0.0266	0.309	1	0.886608		0.0204186				0.315	0.893783	0.870897		0.870643	0.892689
								0.31	29.7	0.0297	0.31	2	0.867291		26.7	0.0267	0.31	1	0.887097		0.019806				0.316	0.894311	0.871523		0.871264	0.893211
								0.311	29.8	0.0298	0.311	3	0.868943		26.8	0.0268	0.311	1	0.887586		0.0186428				0.317	0.894836	0.872146		0.87188	0.89373
								0.312	29.9	0.0299	0.312	1	0.869493		26.9	0.0269	0.312	1	0.888074		0.0185809				0.318	0.895357	0.872765		0.872493	0.894245
								0.313	30	0.03	0.313	2	0.870595		26.9	0.0269	0.313	4	0.890029		0.0194346				0.319	0.895875	0.873379		0.873101	0.894757
								0.314	30	0.03	0.314	1	0.871145		26.9	0.0269	0.314	1	0.890518		0.0193727				0.32	0.896389	0.873989		0.873705	0.895266
								0.315	30.1	0.0301	0.315	1	0.871696		26.9	0.0269	0.315	1	0.891007		0.0193108				0.321	0.8969	0.874595		0.874305	0.895771
								0.316	30.4	0.0304	0.316	1	0.872247		26.9	0.0269	0.316	0	0.891007		0.0187601				0.322	0.897407	0.875197		0.874902	0.896274
								0.317	30.4	0.0304	0.317	0	0.872247		27	0.027	0.317	0	0.891007		0.0187601				0.323	0.897911	0.875796		0.875494	0.896773
								0.318	30.5	0.0305	0.318	4	0.874449		27.1	0.0271	0.318	0	0.891007		0.0165575				0.324	0.898412	0.87639		0.876082	0.897269
								0.319	30.5	0.0305	0.319	1	0.875		27.1	0.0271	0.319	1	0.891496		0.0164956				0.325	0.89891	0.87698		0.876667	0.897761
								0.32	30.6	0.0306	0.32	1	0.875551		27.1	0.0271	0.32	3	0.892962		0.0174112				0.326	0.899404	0.877567		0.877248	0.898251
								0.321	30.8	0.0308	0.321	0	0.875551		27.2	0.0272	0.321	1	0.893451		0.0179				0.327	0.899895	0.878149		0.877825	0.898737
								0.322	30.8	0.0308	0.322	1	0.876101		27.3	0.0273	0.322	2	0.894428		0.0183268				0.328	0.900383	0.878728		0.878398	0.899221
								0.323	30.9	0.0309	0.323	3	0.877753		27.3	0.0273	0.323	3	0.895894		0.0181411				0.329	0.900868	0.879303		0.878967	0.899701
								0.324	30.9	0.0309	0.324	1	0.878304		27.4	0.0274	0.324	3	0.897361		0.0190567				0.33	0.90135	0.879874		0.879533	0.900179
								0.325	30.9	0.0309	0.325	0	0.878304		27.4	0.0274	0.325	0	0.897361		0.0190567				0.331	0.901828	0.880441		0.880095	0.900653
								0.326	31.2	0.0312	0.326	0	0.878304		27.5	0.0275	0.326	1	0.897849		0.0195455				0.332	0.902304	0.881005		0.880654	0.901125
								0.327	31.3	0.0313	0.327	3	0.879956		27.6	0.0276	0.327	2	0.898827		0.018871				0.333	0.902776	0.881565		0.881209	0.901593
								0.328	31.3	0.0313	0.328	1	0.880507		27.7	0.0277	0.328	1	0.899316		0.0188091				0.334	0.903245	0.882122		0.88176	0.902059
								0.329	31.3	0.0313	0.329	3	0.882159		27.7	0.0277	0.329	0	0.899316		0.0171571				0.335	0.903712	0.882674		0.882308	0.902522
								0.33	31.4	0.0314	0.33	0	0.882159		27.7	0.0277	0.33	1	0.899804		0.0176459				0.336	0.904175	0.883224		0.882852	0.902982
								0.331	31.6	0.0316	0.331	0	0.882159		27.8	0.0278	0.331	1	0.900293		0.0181347				0.337	0.904636	0.883769		0.883392	0.903439
								0.332	31.8	0.0318	0.332	3	0.883811		28	0.028	0.332	3	0.90176		0.017949				0.338	0.905093	0.884311		0.88393	0.903893
								0.333	31.9	0.0319	0.333	1	0.884361		28	0.028	0.333	0	0.90176		0.0173983				0.339	0.905548	0.88485		0.884464	0.904345
								0.334	32.1	0.0321	0.334	0	0.884361		28	0.028	0.334	2	0.902737		0.0183758				0.34	0.906	0.885385		0.884994	0.904793
								0.335	32.2	0.0322	0.335	1	0.884912		28.1	0.0281	0.335	1	0.903226		0.0183139				0.341	0.906449	0.885917		0.885521	0.90524
								0.336	32.3	0.0323	0.336	0	0.884912		28.1	0.0281	0.336	0	0.903226		0.0183139				0.342	0.906895	0.886446		0.886045	0.905683
								0.337	32.3	0.0323	0.337	2	0.886013		28.1	0.0281	0.337	0	0.903226		0.0172126				0.343	0.907338	0.886971		0.886565	0.906124
								0.338	32.3	0.0323	0.338	0	0.886013		28.1	0.0281	0.338	0	0.903226		0.0172126				0.344	0.907779	0.887492		0.887082	0.906562
								0.339	32.3	0.0323	0.339	1	0.886564		28.1	0.0281	0.339	2	0.904203		0.0176394				0.345	0.908217	0.888011		0.887596	0.906997
								0.34	32.4	0.0324	0.34	0	0.886564		28.2	0.0282	0.34	3	0.90567		0.0191057				0.346	0.908652	0.888526		0.888107	0.90743
								0.341	32.4	0.0324	0.341	0	0.886564		28.2	0.0282	0.341	0	0.90567		0.0191057				0.347	0.909084	0.889038		0.888614	0.90786
								0.342	32.4	0.0324	0.342	2	0.887665		28.3	0.0283	0.342	1	0.906158		0.0184932				0.348	0.909514	0.889546		0.889119	0.908288
								0.343	32.5	0.0325	0.343	1	0.888216		28.4	0.0284	0.343	0	0.906158		0.0179425				0.349	0.909941	0.890052		0.88962	0.908713
								0.344	32.5	0.0325	0.344	2	0.889317		28.6	0.0286	0.344	1	0.906647		0.0173299				0.35	0.910366	0.890554		0.890118	0.909136
								0.345	32.5	0.0325	0.345	1	0.889868		28.6	0.0286	0.345	3	0.908113		0.0182456				0.351	0.910787	0.891053		0.890613	0.909556
								0.346	32.6	0.0326	0.346	2	0.890969		28.6	0.0286	0.346	1	0.908602		0.017633				0.352	0.911207	0.891549		0.891104	0.909973
								0.347	32.7	0.0327	0.347	0	0.890969		28.7	0.0287	0.347	1	0.909091		0.0181217				0.353	0.911624	0.892042		0.891593	0.910388
								0.348	32.8	0.0328	0.348	0	0.890969		28.8	0.0288	0.348	0	0.909091		0.0181217				0.354	0.912038	0.892531		0.892079	0.910801
								0.349	32.8	0.0328	0.349	0	0.890969		28.8	0.0288	0.349	2	0.910068		0.0190993				0.355	0.912449	0.893018		0.892562	0.911212
								0.35	32.8	0.0328	0.35	3	0.892621		28.8	0.0288	0.35	1	0.910557		0.017936				0.356	0.912859	0.893502		0.893041	0.911619
								0.351	32.8	0.0328	0.351	2	0.893722		28.8	0.0288	0.351	1	0.911046		0.0173235				0.357	0.913265	0.893982		0.893518	0.912025
								0.352	32.8	0.0328	0.352	1	0.894273		28.9	0.0289	0.352	1	0.911535		0.0172616				0.358	0.91367	0.89446		0.893992	0.912428
								0.353	32.9	0.0329	0.353	0	0.894273		28.9	0.0289	0.353	1	0.912023		0.0177503				0.359	0.914072	0.894935		0.894463	0.912829
								0.354	33	0.033	0.354	1	0.894824		28.9	0.0289	0.354	0	0.912023		0.0171997				0.36	0.914471	0.895407		0.894931	0.913228
								0.355	33.1	0.0331	0.355	2	0.895925		29	0.029	0.355	0	0.912023		0.0160984				0.361	0.914868	0.895875		0.895396	0.913624
								0.356	33.1	0.0331	0.356	2	0.897026		29.1	0.0291	0.356	1	0.912512		0.0154858				0.362	0.915263	0.896341		0.895859	0.914018
								0.357	33.2	0.0332	0.357	0	0.897026		29.1	0.0291	0.357	1	0.913001		0.0159745				0.363	0.915655	0.896805		0.896319	0.91441
								0.358	33.2	0.0332	0.358	0	0.897026		29.2	0.0292	0.358	0	0.913001		0.0159745				0.364	0.916045	0.897265		0.896775	0.914799
								0.359	33.3	0.0333	0.359	0	0.897026		29.2	0.0292	0.359	0	0.913001		0.0159745				0.365	0.916433	0.897722		0.89723	0.915186
								0.36	33.3	0.0333	0.36	0	0.897026		29.2	0.0292	0.36	1	0.91349		0.0164633				0.366	0.916818	0.898177		0.897681	0.915571
								0.361	33.3	0.0333	0.361	3	0.898678		29.4	0.0294	0.361	2	0.914467		0.0157888				0.367	0.917201	0.898629		0.89813	0.915954
								0.362	33.4	0.0334	0.362	2	0.89978		29.4	0.0294	0.362	1	0.914956		0.0151763				0.368	0.917582	0.899078		0.898575	0.916335
								0.363	33.6	0.0336	0.363	0	0.89978		29.6	0.0296	0.363	1	0.915445		0.015665				0.369	0.917961	0.899525		0.899019	0.916714
								0.364	33.6	0.0336	0.364	0	0.89978		29.6	0.0296	0.364	1	0.915934		0.0161538				0.37	0.918337	0.899969		0.899459	0.91709
								0.365	33.6	0.0336	0.365	1	0.90033		29.7	0.0297	0.365	0	0.915934		0.0156031				0.371	0.918711	0.90041		0.899897	0.917464
								0.366	33.7	0.0337	0.366	0	0.90033		29.7	0.0297	0.366	0	0.915934		0.0156031				0.372	0.919084	0.900848		0.900333	0.917836
								0.367	33.7	0.0337	0.367	1	0.900881		30	0.03	0.367	1	0.916422		0.0155412				0.373	0.919453	0.901284		0.900766	0.918207
								0.368	33.9	0.0339	0.368	1	0.901432		30	0.03	0.368	1	0.916911		0.0154793				0.374	0.919821	0.901717		0.901196	0.918575
								0.369	33.9	0.0339	0.369	1	0.901982		30.1	0.0301	0.369	2	0.917889		0.0159062				0.375	0.920187	0.902148		0.901624	0.918941
								0.37	34.2	0.0342	0.37	4	0.904185		30.1	0.0301	0.37	1	0.918377		0.0141923				0.376	0.92055	0.902576		0.902049	0.919305
								0.371	34.2	0.0342	0.371	1	0.904736		30.2	0.0302	0.371	2	0.919355		0.0146192				0.377	0.920912	0.903001		0.902471	0.919666
								0.372	34.3	0.0343	0.372	1	0.905286		30.2	0.0302	0.372	1	0.919844		0.0145573				0.378	0.921271	0.903424		0.902892	0.920026
								0.373	34.4	0.0344	0.373	2	0.906388		30.2	0.0302	0.373	2	0.920821		0.0144334				0.379	0.921628	0.903844		0.903309	0.920384
								0.374	34.4	0.0344	0.374	1	0.906938		30.2	0.0302	0.374	0	0.920821		0.0138828				0.38	0.921983	0.904262		0.903725	0.92074
								0.375	34.6	0.0346	0.375	0	0.906938		30.3	0.0303	0.375	0	0.920821		0.0138828				0.381	0.922336	0.904678		0.904137	0.921094
								0.376	34.6	0.0346	0.376	1	0.907489		30.3	0.0303	0.376	0	0.920821		0.0133321				0.382	0.922687	0.905091		0.904548	0.921446
								0.377	34.7	0.0347	0.377	0	0.907489		30.3	0.0303	0.377	0	0.920821		0.0133321				0.383	0.923037	0.905501		0.904956	0.921797
								0.378	34.8	0.0348	0.378	3	0.909141		30.4	0.0304	0.378	2	0.921799		0.0126577				0.384	0.923384	0.90591		0.905362	0.922145
								0.379	34.8	0.0348	0.379	0	0.909141		30.4	0.0304	0.379	2	0.922776		0.0136352				0.385	0.923729	0.906315		0.905765	0.922491
								0.38	34.8	0.0348	0.38	0	0.909141		30.6	0.0306	0.38	2	0.923754		0.0146127				0.386	0.924072	0.906719		0.906166	0.922836
								0.381	34.9	0.0349	0.381	0	0.909141		30.6	0.0306	0.381	1	0.924242		0.0151015				0.387	0.924413	0.90712		0.906565	0.923178
								0.382	34.9	0.0349	0.382	1	0.909692		30.6	0.0306	0.382	0	0.924242		0.0145508				0.388	0.924753	0.907518		0.906961	0.923519
								0.383	34.9	0.0349	0.383	0	0.909692		30.6	0.0306	0.383	1	0.924731		0.0150396				0.389	0.92509	0.907915		0.907355	0.923858
								0.384	35.1	0.0351	0.384	0	0.909692		30.7	0.0307	0.384	0	0.924731		0.0150396				0.39	0.925426	0.908309		0.907747	0.924195
								0.385	35.2	0.0352	0.385	2	0.910793		30.8	0.0308	0.385	0	0.924731		0.0139382				0.391	0.92576	0.9087		0.908137	0.92453
								0.386	35.3	0.0353	0.386	1	0.911344		30.8	0.0308	0.386	1	0.92522		0.0138763				0.392	0.926091	0.90909		0.908524	0.924864
								0.387	35.4	0.0354	0.387	0	0.911344		30.9	0.0309	0.387	1	0.925709		0.0143651				0.393	0.926421	0.909477		0.908909	0.925195
								0.388	35.5	0.0355	0.388	2	0.912445		31	0.031	0.388	0	0.925709		0.0132638				0.394	0.92675	0.909862		0.909292	0.925525
								0.389	35.7	0.0357	0.389	0	0.912445		31	0.031	0.389	1	0.926197		0.0137525				0.395	0.927076	0.910245		0.909673	0.925854
								0.39	35.8	0.0358	0.39	0	0.912445		31	0.031	0.39	1	0.926686		0.0142413				0.396	0.9274	0.910626		0.910052	0.92618
								0.391	36.2	0.0362	0.391	4	0.914648		31.1	0.0311	0.391	2	0.927664		0.0130162				0.397	0.927723	0.911004		0.910428	0.926505
								0.392	36.4	0.0364	0.392	1	0.915198		31.2	0.0312	0.392	0	0.927664		0.0124655				0.398	0.928044	0.91138		0.910803	0.926828
								0.393	36.4	0.0364	0.393	0	0.915198		31.2	0.0312	0.393	0	0.927664		0.0124655				0.399	0.928363	0.911754		0.911175	0.927149
								0.394	36.5	0.0365	0.394	0	0.915198		31.3	0.0313	0.394	1	0.928152		0.0129543				0.4	0.928681	0.912126		0.911545	0.927469
								0.395	36.6	0.0366	0.395	1	0.915749		31.5	0.0315	0.395	0	0.928152		0.0124036				0.401	0.928996	0.912496		0.911913	0.927786
								0.396	36.6	0.0366	0.396	2	0.91685		31.5	0.0315	0.396	0	0.928152		0.0113023				0.402	0.92931	0.912864		0.91228	0.928103
								0.397	36.6	0.0366	0.397	0	0.91685		31.5	0.0315	0.397	1	0.928641		0.011791				0.403	0.929623	0.91323		0.912644	0.928417
								0.398	36.7	0.0367	0.398	1	0.917401		31.5	0.0315	0.398	0	0.928641		0.0112404				0.404	0.929933	0.913593		0.913006	0.92873
								0.399	36.7	0.0367	0.399	1	0.917952		31.5	0.0315	0.399	0	0.928641		0.0106897				0.405	0.930242	0.913955		0.913366	0.929041
								0.4	36.8	0.0368	0.4	2	0.919053		31.7	0.0317	0.4	1	0.92913		0.0100771				0.406	0.930549	0.914314		0.913724	0.929351
								0.401	36.9	0.0369	0.401	0	0.919053		31.7	0.0317	0.401	0	0.92913		0.0100771				0.407	0.930855	0.914672		0.91408	0.929659
								0.402	36.9	0.0369	0.402	0	0.919053		31.7	0.0317	0.402	0	0.92913		0.0100771				0.408	0.931159	0.915027		0.914434	0.929966
								0.403	37.1	0.0371	0.403	1	0.919604		31.7	0.0317	0.403	0	0.92913		0.00952649				0.409	0.931461	0.915381		0.914786	0.930271
								0.404	37.3	0.0373	0.404	0	0.919604		31.8	0.0318	0.404	1	0.929619		0.0100152				0.41	0.931762	0.915732		0.915136	0.930574
								0.405	37.4	0.0374	0.405	0	0.919604		31.8	0.0318	0.405	0	0.929619		0.0100152				0.411	0.932061	0.916082		0.915484	0.930876
								0.406	37.5	0.0375	0.406	0	0.919604		31.9	0.0319	0.406	1	0.930108		0.010504				0.412	0.932358	0.916429		0.915831	0.931176
								0.407	37.5	0.0375	0.407	0	0.919604		32	0.032	0.407	2	0.931085		0.0114815				0.413	0.932654	0.916775		0.916175	0.931475
								0.408	37.5	0.0375	0.408	0	0.919604		32	0.032	0.408	0	0.931085		0.0114815				0.414	0.932948	0.917119		0.916518	0.931772
								0.409	37.5	0.0375	0.409	0	0.919604		32.1	0.0321	0.409	1	0.931574		0.0119703				0.415	0.933241	0.917461		0.916859	0.932067
								0.41	37.6	0.0376	0.41	1	0.920154		32.1	0.0321	0.41	2	0.932551		0.0123971				0.416	0.933532	0.917801		0.917198	0.932361
								0.411	37.6	0.0376	0.411	0	0.920154		32.2	0.0322	0.411	0	0.932551		0.0123971				0.417	0.933821	0.918139		0.917535	0.932654
								0.412	37.7	0.0377	0.412	3	0.921806		32.2	0.0322	0.412	2	0.933529		0.0117227				0.418	0.93411	0.918475		0.91787	0.932945
								0.413	37.9	0.0379	0.413	2	0.922907		32.3	0.0323	0.413	0	0.933529		0.0106213				0.419	0.934396	0.91881		0.918203	0.933235
								0.414	38	0.038	0.414	1	0.923458		32.3	0.0323	0.414	1	0.934018		0.0105594				0.42	0.934681	0.919142		0.918535	0.933523
								0.415	38	0.038	0.415	0	0.923458		32.4	0.0324	0.415	1	0.934506		0.0110482				0.421	0.934965	0.919473		0.918865	0.93381
								0.416	38.2	0.0382	0.416	1	0.924009		32.4	0.0324	0.416	0	0.934506		0.0104975				0.422	0.935247	0.919802		0.919193	0.934095
								0.417	38.3	0.0383	0.417	0	0.924009		32.6	0.0326	0.417	1	0.934995		0.0109863				0.423	0.935527	0.920129		0.919519	0.934379
								0.418	38.3	0.0383	0.418	1	0.924559		32.6	0.0326	0.418	1	0.935484		0.0109244				0.424	0.935806	0.920455		0.919844	0.934661
								0.419	38.4	0.0384	0.419	0	0.924559		32.6	0.0326	0.419	0	0.935484		0.0109244				0.425	0.936084	0.920778		0.920167	0.934942
								0.42	38.5	0.0385	0.42	1	0.92511		32.8	0.0328	0.42	0	0.935484		0.0103737				0.426	0.93636	0.9211		0.920488	0.935222
								0.421	38.6	0.0386	0.421	0	0.92511		32.8	0.0328	0.421	0	0.935484		0.0103737				0.427	0.936635	0.92142		0.920807	0.9355
								0.422	38.7	0.0387	0.422	1	0.925661		32.8	0.0328	0.422	0	0.935484		0.00982308				0.428	0.936908	0.921739		0.921125	0.935777
								0.423	38.7	0.0387	0.423	1	0.926211		32.9	0.0329	0.423	0	0.935484		0.00927242				0.429	0.93718	0.922055		0.921441	0.936052
								0.424	38.9	0.0389	0.424	1	0.926762		32.9	0.0329	0.424	2	0.936461		0.00969927				0.43	0.93745	0.92237		0.921756	0.936326
								0.425	39	0.039	0.425	0	0.926762		33.2	0.0332	0.425	0	0.936461		0.00969927				0.431	0.937719	0.922684		0.922068	0.936599
								0.426	39	0.039	0.426	1	0.927313		33.3	0.0333	0.426	1	0.93695		0.00963737				0.432	0.937987	0.922995		0.922379	0.93687
								0.427	39.1	0.0391	0.427	0	0.927313		33.3	0.0333	0.427	1	0.937439		0.0101261				0.433	0.938253	0.923305		0.922689	0.93714
								0.428	39.3	0.0393	0.428	0	0.927313		33.4	0.0334	0.428	0	0.937439		0.0101261				0.434	0.938518	0.923614		0.922997	0.937409
								0.429	39.4	0.0394	0.429	0	0.927313		33.5	0.0335	0.429	0	0.937439		0.0101261				0.435	0.938782	0.92392		0.923303	0.937676
								0.43	39.4	0.0394	0.43	1	0.927863		33.6	0.0336	0.43	0	0.937439		0.00957547				0.436	0.939044	0.924225		0.923608	0.937942
								0.431	39.6	0.0396	0.431	0	0.927863		33.7	0.0337	0.431	2	0.938416		0.010553				0.437	0.939305	0.924529		0.923911	0.938207
								0.432	39.6	0.0396	0.432	0	0.927863		33.8	0.0338	0.432	1	0.938905		0.0110417				0.438	0.939564	0.924831		0.924212	0.93847
								0.433	39.6	0.0396	0.433	1	0.928414		33.8	0.0338	0.433	0	0.938905		0.0104911				0.439	0.939823	0.925131		0.924512	0.938733
								0.434	39.7	0.0397	0.434	0	0.928414		33.9	0.0339	0.434	0	0.938905		0.0104911				0.44	0.940079	0.92543		0.924811	0.938993
								0.435	40	0.04	0.435	0	0.928414		33.9	0.0339	0.435	1	0.939394		0.0109798				0.441	0.940335	0.925727		0.925108	0.939253
								0.436	40	0.04	0.436	0	0.928414		33.9	0.0339	0.436	1	0.939883		0.0114686				0.442	0.940589	0.926022		0.925403	0.939511
								0.437	40.5	0.0405	0.437	1	0.928965		34	0.034	0.437	0	0.939883		0.0109179				0.443	0.940842	0.926316		0.925697	0.939768
								0.438	40.5	0.0405	0.438	0	0.928965		34.1	0.0341	0.438	2	0.94086		0.0118955				0.444	0.941094	0.926609		0.925989	0.940024
								0.439	40.6	0.0406	0.439	0	0.928965		34.1	0.0341	0.439	0	0.94086		0.0118955				0.445	0.941345	0.9269		0.92628	0.940279
								0.44	40.7	0.0407	0.44	0	0.928965		34.1	0.0341	0.44	0	0.94086		0.0118955				0.446	0.941594	0.927189		0.926569	0.940532
								0.441	40.7	0.0407	0.441	1	0.929515		34.2	0.0342	0.441	0	0.94086		0.0113448				0.447	0.941842	0.927477		0.926857	0.940784
								0.442	40.7	0.0407	0.442	1	0.930066		34.3	0.0343	0.442	1	0.941349		0.0112829				0.448	0.942088	0.927763		0.927144	0.941035
								0.443	40.7	0.0407	0.443	0	0.930066		34.5	0.0345	0.443	1	0.941838		0.0117717				0.449	0.942334	0.928048		0.927428	0.941285
								0.444	40.8	0.0408	0.444	2	0.931167		34.5	0.0345	0.444	2	0.942815		0.0116478				0.45	0.942578	0.928332		0.927712	0.941533
								0.445	41	0.041	0.445	1	0.931718		34.5	0.0345	0.445	0	0.942815		0.0110972				0.451	0.942821	0.928614		0.927994	0.941781
								0.446	41.1	0.0411	0.446	0	0.931718		34.7	0.0347	0.446	0	0.942815		0.0110972				0.452	0.943063	0.928894		0.928275	0.942027
								0.447	41.2	0.0412	0.447	0	0.931718		34.7	0.0347	0.447	1	0.943304		0.0115859				0.453	0.943304	0.929174		0.928554	0.942272
								0.448	41.3	0.0413	0.448	0	0.931718		34.8	0.0348	0.448	0	0.943304		0.0115859				0.454	0.943543	0.929451		0.928832	0.942515
								0.449	41.3	0.0413	0.449	0	0.931718		34.8	0.0348	0.449	0	0.943304		0.0115859				0.455	0.943781	0.929728		0.929108	0.942758
								0.45	41.3	0.0413	0.45	0	0.931718		34.9	0.0349	0.45	0	0.943304		0.0115859				0.456	0.944018	0.930002		0.929383	0.942999
								0.451	41.5	0.0415	0.451	1	0.932269		34.9	0.0349	0.451	0	0.943304		0.0110353				0.457	0.944254	0.930276		0.929657	0.94324
								0.452	41.6	0.0416	0.452	1	0.932819		35	0.035	0.452	0	0.943304		0.0104846				0.458	0.944489	0.930548		0.929929	0.943479
								0.453	41.6	0.0416	0.453	0	0.932819		35.2	0.0352	0.453	0	0.943304		0.0104846				0.459	0.944722	0.930819		0.9302	0.943717
								0.454	41.6	0.0416	0.454	0	0.932819		35.2	0.0352	0.454	1	0.943793		0.0109734				0.46	0.944955	0.931088		0.93047	0.943954
								0.455	41.6	0.0416	0.455	0	0.932819		35.3	0.0353	0.455	0	0.943793		0.0109734				0.461	0.945186	0.931356		0.930738	0.94419
								0.456	41.6	0.0416	0.456	0	0.932819		35.3	0.0353	0.456	1	0.944282		0.0114621				0.462	0.945416	0.931623		0.931005	0.944424
								0.457	41.6	0.0416	0.457	0	0.932819		35.4	0.0354	0.457	1	0.94477		0.0119509				0.463	0.945645	0.931888		0.931271	0.944658
								0.458	41.7	0.0417	0.458	1	0.93337		35.4	0.0354	0.458	0	0.94477		0.0114002				0.464	0.945873	0.932152		0.931535	0.94489
								0.459	41.8	0.0418	0.459	0	0.93337		35.5	0.0355	0.459	0	0.94477		0.0114002				0.465	0.9461	0.932414		0.931798	0.945122
								0.46	41.8	0.0418	0.46	0	0.93337		35.5	0.0355	0.46	0	0.94477		0.0114002				0.466	0.946325	0.932676		0.93206	0.945352
								0.461	41.8	0.0418	0.461	0	0.93337		35.7	0.0357	0.461	1	0.945259		0.011889				0.467	0.94655	0.932936		0.932321	0.945581
								0.462	41.9	0.0419	0.462	0	0.93337		35.7	0.0357	0.462	2	0.946237		0.0128665				0.468	0.946773	0.933195		0.93258	0.945809
								0.463	41.9	0.0419	0.463	0	0.93337		35.8	0.0358	0.463	0	0.946237		0.0128665				0.469	0.946995	0.933452		0.932838	0.946036
								0.464	41.9	0.0419	0.464	1	0.933921		35.8	0.0358	0.464	0	0.946237		0.0123159				0.47	0.947217	0.933708		0.933094	0.946262
								0.465	41.9	0.0419	0.465	0	0.933921		35.9	0.0359	0.465	0	0.946237		0.0123159				0.471	0.947437	0.933963		0.93335	0.946487
								0.466	42.1	0.0421	0.466	2	0.935022		35.9	0.0359	0.466	0	0.946237		0.0112145				0.472	0.947656	0.934217		0.933604	0.946711
								0.467	42.2	0.0422	0.467	1	0.935573		36	0.036	0.467	1	0.946725		0.0111526				0.473	0.947874	0.934469		0.933857	0.946934
								0.468	42.2	0.0422	0.468	0	0.935573		36.1	0.0361	0.468	0	0.946725		0.0111526				0.474	0.948091	0.93472		0.934109	0.947156
								0.469	42.3	0.0423	0.469	0	0.935573		36.1	0.0361	0.469	0	0.946725		0.0111526				0.475	0.948307	0.93497		0.934359	0.947376
								0.47	42.3	0.0423	0.47	0	0.935573		36.1	0.0361	0.47	1	0.947214		0.0116414				0.476	0.948522	0.935218		0.934609	0.947596
								0.471	42.3	0.0423	0.471	1	0.936123		36.1	0.0361	0.471	0	0.947214		0.0110907				0.477	0.948736	0.935466		0.934857	0.947815
								0.472	42.4	0.0424	0.472	1	0.936674		36.1	0.0361	0.472	2	0.948192		0.0115176				0.478	0.948949	0.935712		0.935104	0.948033
								0.473	42.4	0.0424	0.473	0	0.936674		36.4	0.0364	0.473	0	0.948192		0.0115176				0.479	0.949161	0.935957		0.93535	0.948249
								0.474	42.5	0.0425	0.474	0	0.936674		36.5	0.0365	0.474	1	0.94868		0.0120063				0.48	0.949372	0.936201		0.935594	0.948465
								0.475	42.5	0.0425	0.475	1	0.937225		36.5	0.0365	0.475	0	0.94868		0.0114557				0.481	0.949581	0.936444		0.935838	0.94868
								0.476	42.6	0.0426	0.476	0	0.937225		36.6	0.0366	0.476	1	0.949169		0.0119444				0.482	0.94979	0.936685		0.93608	0.948894
								0.477	42.6	0.0426	0.477	0	0.937225		36.6	0.0366	0.477	2	0.950147		0.012922				0.483	0.949998	0.936925		0.936321	0.949106
								0.478	42.6	0.0426	0.478	0	0.937225		36.7	0.0367	0.478	2	0.951124		0.0138995				0.484	0.950205	0.937164		0.936561	0.949318
								0.479	42.7	0.0427	0.479	0	0.937225		36.9	0.0369	0.479	1	0.951613		0.0143882				0.485	0.950411	0.937402		0.9368	0.949529
								0.48	42.8	0.0428	0.48	0	0.937225		37	0.037	0.48	0	0.951613		0.0143882				0.486	0.950616	0.937639		0.937038	0.949739
								0.481	42.8	0.0428	0.481	2	0.938326		37.1	0.0371	0.481	1	0.952102		0.0137757				0.487	0.95082	0.937875		0.937274	0.949948
								0.482	43.2	0.0432	0.482	0	0.938326		37.1	0.0371	0.482	0	0.952102		0.0137757				0.488	0.951022	0.938109		0.93751	0.950156
								0.483	43.3	0.0433	0.483	0	0.938326		37.1	0.0371	0.483	1	0.95259		0.0142644				0.489	0.951224	0.938343		0.937744	0.950363
								0.484	43.3	0.0433	0.484	0	0.938326		37.1	0.0371	0.484	0	0.95259		0.0142644				0.49	0.951425	0.938575		0.937977	0.950569
								0.485	43.4	0.0434	0.485	0	0.938326		37.1	0.0371	0.485	1	0.953079		0.0147532				0.491	0.951626	0.938806		0.93821	0.950774
								0.486	43.6	0.0436	0.486	1	0.938877		37.2	0.0372	0.486	0	0.953079		0.0142025				0.492	0.951825	0.939036		0.938441	0.950978
								0.487	43.8	0.0438	0.487	1	0.939427		37.2	0.0372	0.487	0	0.953079		0.0136519				0.493	0.952023	0.939265		0.938671	0.951181
								0.488	43.9	0.0439	0.488	2	0.940529		37.2	0.0372	0.488	0	0.953079		0.0125505				0.494	0.95222	0.939493		0.9389	0.951383
								0.489	43.9	0.0439	0.489	0	0.940529		37.3	0.0373	0.489	2	0.954057		0.0135281				0.495	0.952416	0.93972		0.939127	0.951585
								0.49	44.1	0.0441	0.49	0	0.940529		37.3	0.0373	0.49	0	0.954057		0.0135281				0.496	0.952612	0.939946		0.939354	0.951785
								0.491	44.5	0.0445	0.491	1	0.941079		37.3	0.0373	0.491	0	0.954057		0.0129774				0.497	0.952806	0.94017		0.93958	0.951985
								0.492	44.5	0.0445	0.492	0	0.941079		37.4	0.0374	0.492	0	0.954057		0.0129774				0.498	0.953	0.940394		0.939805	0.952184
								0.493	44.7	0.0447	0.493	1	0.94163		37.5	0.0375	0.493	0	0.954057		0.0124267				0.499	0.953193	0.940617		0.940029	0.952381
								0.494	44.7	0.0447	0.494	0	0.94163		37.6	0.0376	0.494	0	0.954057		0.0124267				0.5	0.953384	0.940838		0.940251	0.952578
								0.495	44.7	0.0447	0.495	2	0.942731		37.7	0.0377	0.495	0	0.954057		0.0113254				0.501	0.953575	0.941059		0.940473	0.952774
								0.496	44.8	0.0448	0.496	0	0.942731		37.7	0.0377	0.496	1	0.954545		0.0118142				0.502	0.953765	0.941278		0.940694	0.95297
								0.497	44.9	0.0449	0.497	0	0.942731		37.8	0.0378	0.497	0	0.954545		0.0118142				0.503	0.953955	0.941496		0.940913	0.953164
								0.498	45	0.045	0.498	0	0.942731		37.8	0.0378	0.498	1	0.955034		0.0123029				0.504	0.954143	0.941714		0.941132	0.953357
								0.499	45	0.045	0.499	1	0.943282		38	0.038	0.499	0	0.955034		0.0117523				0.505	0.95433	0.94193		0.941349	0.95355
								0.5	45.1	0.0451	0.5	0	0.943282		38	0.038	0.5	1	0.955523		0.012241				0.506	0.954517	0.942145		0.941566	0.953741
								0.501	45.1	0.0451	0.501	0	0.943282		38.1	0.0381	0.501	0	0.955523		0.012241				0.507	0.954702	0.94236		0.941782	0.953932
								0.502	45.2	0.0452	0.502	1	0.943833		38.2	0.0382	0.502	1	0.956012		0.0121791				0.508	0.954887	0.942573		0.941996	0.954122
								0.503	45.2	0.0452	0.503	0	0.943833		38.2	0.0382	0.503	0	0.956012		0.0121791				0.509	0.955071	0.942786		0.94221	0.954311
								0.504	45.2	0.0452	0.504	0	0.943833		38.2	0.0382	0.504	0	0.956012		0.0121791				0.51	0.955254	0.942997		0.942423	0.9545
								0.505	45.3	0.0453	0.505	0	0.943833		38.3	0.0383	0.505	0	0.956012		0.0121791				0.511	0.955436	0.943207		0.942635	0.954687
								0.506	45.4	0.0454	0.506	0	0.943833		38.3	0.0383	0.506	0	0.956012		0.0121791				0.512	0.955618	0.943417		0.942845	0.954874
								0.507	45.8	0.0458	0.507	0	0.943833		38.3	0.0383	0.507	0	0.956012		0.0121791				0.513	0.955798	0.943625		0.943055	0.955059
								0.508	45.9	0.0459	0.508	1	0.944383		38.4	0.0384	0.508	0	0.956012		0.0116285				0.514	0.955978	0.943833		0.943264	0.955244
								0.509	45.9	0.0459	0.509	1	0.944934		38.4	0.0384	0.509	0	0.956012		0.0110778				0.515	0.956157	0.944039		0.943472	0.955428
								0.51	45.9	0.0459	0.51	0	0.944934		38.5	0.0385	0.51	0	0.956012		0.0110778				0.516	0.956335	0.944245		0.943679	0.955612
								0.511	46	0.046	0.511	0	0.944934		38.5	0.0385	0.511	0	0.956012		0.0110778				0.517	0.956512	0.94445		0.943885	0.955794
								0.512	46.1	0.0461	0.512	0	0.944934		38.5	0.0385	0.512	0	0.956012		0.0110778				0.518	0.956689	0.944654		0.944091	0.955976
								0.513	46.4	0.0464	0.513	1	0.945485		38.7	0.0387	0.513	0	0.956012		0.0105271				0.519	0.956864	0.944856		0.944295	0.956157
								0.514	46.4	0.0464	0.514	0	0.945485		38.7	0.0387	0.514	1	0.9565		0.0110159				0.52	0.957039	0.945058		0.944498	0.956337
								0.515	46.5	0.0465	0.515	1	0.946035		38.7	0.0387	0.515	0	0.9565		0.0104652				0.521	0.957213	0.945259		0.944701	0.956516
								0.516	46.6	0.0466	0.516	1	0.946586		38.8	0.0388	0.516	0	0.9565		0.00991459				0.522	0.957387	0.945459		0.944902	0.956695
								0.517	46.7	0.0467	0.517	0	0.946586		38.8	0.0388	0.517	1	0.956989		0.0104033				0.523	0.957559	0.945658		0.945103	0.956872
								0.518	46.7	0.0467	0.518	2	0.947687		38.8	0.0388	0.518	0	0.956989		0.00930202				0.524	0.957731	0.945857		0.945303	0.957049
								0.519	46.7	0.0467	0.519	1	0.948238		38.8	0.0388	0.519	0	0.956989		0.00875136				0.525	0.957902	0.946054		0.945502	0.957225
								0.52	46.8	0.0468	0.52	0	0.948238		39	0.039	0.52	0	0.956989		0.00875136				0.526	0.958072	0.946251		0.9457	0.957401
								0.521	46.8	0.0468	0.521	0	0.948238		39	0.039	0.521	0	0.956989		0.00875136				0.527	0.958241	0.946446		0.945897	0.957575
								0.522	46.8	0.0468	0.522	0	0.948238		39.1	0.0391	0.522	0	0.956989		0.00875136				0.528	0.95841	0.946641		0.946093	0.957749
								0.523	47	0.047	0.523	0	0.948238		39.2	0.0392	0.523	0	0.956989		0.00875136				0.529	0.958578	0.946835		0.946289	0.957922
								0.524	47	0.047	0.524	1	0.948789		39.2	0.0392	0.524	0	0.956989		0.0082007				0.53	0.958745	0.947028		0.946483	0.958095
								0.525	47.1	0.0471	0.525	1	0.949339		39.3	0.0393	0.525	1	0.957478		0.0081388				0.531	0.958911	0.94722		0.946677	0.958266
								0.526	47.1	0.0471	0.526	0	0.949339		39.3	0.0393	0.526	0	0.957478		0.0081388				0.532	0.959077	0.947411		0.94687	0.958437
								0.527	47.2	0.0472	0.527	0	0.949339		39.5	0.0395	0.527	0	0.957478		0.0081388				0.533	0.959241	0.947602		0.947062	0.958607
								0.528	47.4	0.0474	0.528	2	0.950441		39.5	0.0395	0.528	0	0.957478		0.00703748				0.534	0.959405	0.947791		0.947253	0.958776
								0.529	47.6	0.0476	0.529	0	0.950441		39.5	0.0395	0.529	0	0.957478		0.00703748				0.535	0.959569	0.94798		0.947444	0.958945
								0.53	47.6	0.0476	0.53	0	0.950441		39.6	0.0396	0.53	0	0.957478		0.00703748				0.536	0.959731	0.948168		0.947633	0.959113
								0.531	47.7	0.0477	0.531	0	0.950441		39.6	0.0396	0.531	2	0.958456		0.00801499				0.537	0.959893	0.948355		0.947822	0.95928
								0.532	47.8	0.0478	0.532	0	0.950441		39.6	0.0396	0.532	0	0.958456		0.00801499				0.538	0.960054	0.948541		0.94801	0.959447
								0.533	47.9	0.0479	0.533	0	0.950441		39.6	0.0396	0.533	0	0.958456		0.00801499				0.539	0.960215	0.948727		0.948197	0.959612
								0.534	48	0.048	0.534	0	0.950441		39.7	0.0397	0.534	3	0.959922		0.00948127				0.54	0.960375	0.948911		0.948384	0.959777
								0.535	48.1	0.0481	0.535	1	0.950991		39.8	0.0398	0.535	0	0.959922		0.00893061				0.541	0.960534	0.949095		0.948569	0.959941
								0.536	48.1	0.0481	0.536	0	0.950991		39.8	0.0398	0.536	1	0.960411		0.00941937				0.542	0.960692	0.949278		0.948754	0.960105
								0.537	48.1	0.0481	0.537	1	0.951542		39.9	0.0399	0.537	2	0.961388		0.00984622				0.543	0.96085	0.94946		0.948938	0.960268
								0.538	48.2	0.0482	0.538	0	0.951542		39.9	0.0399	0.538	1	0.961877		0.010335				0.544	0.961006	0.949642		0.949121	0.96043
								0.539	48.3	0.0483	0.539	1	0.952093		40	0.04	0.539	1	0.962366		0.0102731				0.545	0.961163	0.949822		0.949303	0.960591
								0.54	48.5	0.0485	0.54	0	0.952093		40.1	0.0401	0.54	1	0.962854		0.0107618				0.546	0.961318	0.950002		0.949485	0.960752
								0.541	48.6	0.0486	0.541	0	0.952093		40.1	0.0401	0.541	1	0.963343		0.0112506				0.547	0.961473	0.950181		0.949666	0.960912
								0.542	48.8	0.0488	0.542	0	0.952093		40.2	0.0402	0.542	1	0.963832		0.0117394				0.548	0.961627	0.950359		0.949846	0.961072
								0.543	48.9	0.0489	0.543	0	0.952093		40.4	0.0404	0.543	0	0.963832		0.0117394				0.549	0.96178	0.950537		0.950025	0.96123
								0.544	48.9	0.0489	0.544	0	0.952093		40.5	0.0405	0.544	0	0.963832		0.0117394				0.55	0.961933	0.950713		0.950204	0.961388
								0.545	48.9	0.0489	0.545	1	0.952643		40.5	0.0405	0.545	0	0.963832		0.0111887				0.551	0.962085	0.950889		0.950381	0.961545
								0.546	48.9	0.0489	0.546	0	0.952643		40.5	0.0405	0.546	1	0.964321		0.0116775				0.552	0.962237	0.951065		0.950558	0.961702
								0.547	48.9	0.0489	0.547	0	0.952643		40.5	0.0405	0.547	0	0.964321		0.0116775				0.553	0.962387	0.951239		0.950735	0.961858
								0.548	48.9	0.0489	0.548	0	0.952643		40.5	0.0405	0.548	1	0.964809		0.0121662				0.554	0.962537	0.951413		0.95091	0.962013
								0.549	49	0.049	0.549	0	0.952643		40.7	0.0407	0.549	0	0.964809		0.0121662				0.555	0.962687	0.951586		0.951085	0.962168
								0.55	49	0.049	0.55	1	0.953194		40.8	0.0408	0.55	1	0.965298		0.0121043				0.556	0.962836	0.951758		0.951259	0.962322
								0.551	49.2	0.0492	0.551	1	0.953744		40.9	0.0409	0.551	0	0.965298		0.0115536				0.557	0.962984	0.951929		0.951432	0.962475
								0.552	49.8	0.0498	0.552	0	0.953744		40.9	0.0409	0.552	0	0.965298		0.0115536				0.558	0.963131	0.9521		0.951605	0.962628
								0.553	49.8	0.0498	0.553	2	0.954846		41.1	0.0411	0.553	0	0.965298		0.0104523				0.559	0.963278	0.95227		0.951777	0.96278
								0.554	49.8	0.0498	0.554	1	0.955396		41.1	0.0411	0.554	0	0.965298		0.00990167				0.56	0.963424	0.952439		0.951948	0.962931
								0.555	50	0.05	0.555	0	0.955396		41.1	0.0411	0.555	0	0.965298		0.00990167				0.561	0.963569	0.952608		0.952118	0.963082
								0.556	50.1	0.0501	0.556	1	0.955947		41.2	0.0412	0.556	0	0.965298		0.00935101				0.562	0.963714	0.952776		0.952288	0.963232
								0.557	50.1	0.0501	0.557	0	0.955947		41.2	0.0412	0.557	0	0.965298		0.00935101				0.563	0.963858	0.952943		0.952457	0.963381
								0.558	50.1	0.0501	0.558	0	0.955947		41.2	0.0412	0.558	0	0.965298		0.00935101				0.564	0.964002	0.953109		0.952626	0.96353
								0.559	50.2	0.0502	0.559	0	0.955947		41.2	0.0412	0.559	0	0.965298		0.00935101				0.565	0.964145	0.953275		0.952793	0.963678
								0.56	50.2	0.0502	0.56	0	0.955947		41.2	0.0412	0.56	0	0.965298		0.00935101				0.566	0.964287	0.95344		0.95296	0.963826
								0.561	50.2	0.0502	0.561	0	0.955947		41.2	0.0412	0.561	0	0.965298		0.00935101				0.567	0.964429	0.953604		0.953126	0.963973
								0.562	50.3	0.0503	0.562	0	0.955947		41.2	0.0412	0.562	0	0.965298		0.00935101				0.568	0.96457	0.953768		0.953292	0.964119
								0.563	50.4	0.0504	0.563	1	0.956498		41.2	0.0412	0.563	0	0.965298		0.00880035				0.569	0.964711	0.95393		0.953457	0.964264
								0.564	50.6	0.0506	0.564	0	0.956498		41.3	0.0413	0.564	0	0.965298		0.00880035				0.57	0.96485	0.954093		0.953621	0.964409
								0.565	50.7	0.0507	0.565	0	0.956498		41.4	0.0414	0.565	0	0.965298		0.00880035				0.571	0.96499	0.954254		0.953785	0.964554
								0.566	50.7	0.0507	0.566	1	0.957048		41.4	0.0414	0.566	0	0.965298		0.00824968				0.572	0.965128	0.954415		0.953947	0.964698
								0.567	50.8	0.0508	0.567	0	0.957048		41.4	0.0414	0.567	1	0.965787		0.00873844				0.573	0.965266	0.954575		0.95411	0.964841
								0.568	50.9	0.0509	0.568	0	0.957048		41.4	0.0414	0.568	2	0.966764		0.00971596				0.574	0.965404	0.954735		0.954271	0.964983
								0.569	50.9	0.0509	0.569	0	0.957048		41.5	0.0415	0.569	0	0.966764		0.00971596				0.575	0.96554	0.954894		0.954432	0.965125
								0.57	50.9	0.0509	0.57	0	0.957048		41.5	0.0415	0.57	0	0.966764		0.00971596				0.576	0.965677	0.955052		0.954592	0.965267
								0.571	51	0.051	0.571	0	0.957048		41.6	0.0416	0.571	0	0.966764		0.00971596				0.577	0.965812	0.955209		0.954752	0.965407
								0.572	51.1	0.0511	0.572	0	0.957048		41.7	0.0417	0.572	0	0.966764		0.00971596				0.578	0.965947	0.955366		0.954911	0.965548
								0.573	51.1	0.0511	0.573	0	0.957048		41.7	0.0417	0.573	2	0.967742		0.0106935				0.579	0.966082	0.955522		0.955069	0.965687
								0.574	51.2	0.0512	0.574	0	0.957048		41.7	0.0417	0.574	0	0.967742		0.0106935				0.58	0.966216	0.955678		0.955226	0.965826
								0.575	51.3	0.0513	0.575	0	0.957048		41.7	0.0417	0.575	1	0.968231		0.0111822				0.581	0.966349	0.955833		0.955383	0.965965
								0.576	51.5	0.0515	0.576	0	0.957048		41.8	0.0418	0.576	0	0.968231		0.0111822				0.582	0.966482	0.955987		0.95554	0.966102
								0.577	51.6	0.0516	0.577	1	0.957599		41.8	0.0418	0.577	1	0.968719		0.0111203				0.583	0.966614	0.956141		0.955696	0.96624
								0.578	51.6	0.0516	0.578	1	0.95815		41.8	0.0418	0.578	0	0.968719		0.0105697				0.584	0.966745	0.956294		0.955851	0.966376
								0.579	51.9	0.0519	0.579	0	0.95815		42	0.042	0.579	0	0.968719		0.0105697				0.585	0.966876	0.956446		0.956005	0.966512
								0.58	51.9	0.0519	0.58	1	0.9587		42	0.042	0.58	0	0.968719		0.010019				0.586	0.967007	0.956598		0.956159	0.966648
								0.581	52	0.052	0.581	0	0.9587		42.1	0.0421	0.581	0	0.968719		0.010019				0.587	0.967137	0.956749		0.956312	0.966783
								0.582	52	0.052	0.582	0	0.9587		42.1	0.0421	0.582	0	0.968719		0.010019				0.588	0.967266	0.9569		0.956465	0.966917
								0.583	52.1	0.0521	0.583	0	0.9587		42.3	0.0423	0.583	0	0.968719		0.010019				0.589	0.967395	0.95705		0.956617	0.967051
								0.584	52.2	0.0522	0.584	0	0.9587		42.3	0.0423	0.584	0	0.968719		0.010019				0.59	0.967523	0.957199		0.956768	0.967184
								0.585	52.3	0.0523	0.585	1	0.959251		42.3	0.0423	0.585	0	0.968719		0.00946835				0.591	0.967651	0.957348		0.956919	0.967317
								0.586	52.9	0.0529	0.586	0	0.959251		42.4	0.0424	0.586	0	0.968719		0.00946835				0.592	0.967778	0.957496		0.957069	0.967449
								0.587	52.9	0.0529	0.587	1	0.959802		42.4	0.0424	0.587	1	0.969208		0.00940645				0.593	0.967904	0.957643		0.957218	0.96758
								0.588	53	0.053	0.588	0	0.959802		42.4	0.0424	0.588	0	0.969208		0.00940645				0.594	0.96803	0.95779		0.957367	0.967712
								0.589	53	0.053	0.589	0	0.959802		42.5	0.0425	0.589	0	0.969208		0.00940645				0.595	0.968156	0.957936		0.957516	0.967842
								0.59	53.2	0.0532	0.59	1	0.960352		42.5	0.0425	0.59	0	0.969208		0.00885579				0.596	0.968281	0.958082		0.957664	0.967972
								0.591	53.2	0.0532	0.591	2	0.961454		42.8	0.0428	0.591	0	0.969208		0.00775447				0.597	0.968405	0.958227		0.957811	0.968101
								0.592	53.4	0.0534	0.592	0	0.961454		42.8	0.0428	0.592	0	0.969208		0.00775447				0.598	0.968529	0.958371		0.957957	0.96823
								0.593	53.5	0.0535	0.593	1	0.962004		42.9	0.0429	0.593	0	0.969208		0.00720381				0.599	0.968652	0.958515		0.958103	0.968358
								0.594	53.5	0.0535	0.594	0	0.962004		43.1	0.0431	0.594	0	0.969208		0.00720381				0.6	0.968775	0.958659		0.958249	0.968486
								0.595	53.6	0.0536	0.595	0	0.962004		43.1	0.0431	0.595	0	0.969208		0.00720381				0.601	0.968897	0.958801		0.958394	0.968613
								0.596	53.9	0.0539	0.596	0	0.962004		43.3	0.0433	0.596	1	0.969697		0.00769256				0.602	0.969019	0.958944		0.958538	0.96874
								0.597	54	0.054	0.597	0	0.962004		43.3	0.0433	0.597	1	0.970186		0.00818132				0.603	0.96914	0.959085		0.958682	0.968866
								0.598	54.1	0.0541	0.598	0	0.962004		43.4	0.0434	0.598	0	0.970186		0.00818132				0.604	0.969261	0.959226		0.958825	0.968992
								0.599	54.3	0.0543	0.599	0	0.962004		43.5	0.0435	0.599	0	0.970186		0.00818132				0.605	0.969381	0.959367		0.958968	0.969117
								0.6	54.4	0.0544	0.6	0	0.962004		43.5	0.0435	0.6	1	0.970674		0.00867008				0.606	0.969501	0.959506		0.95911	0.969242
								0.601	54.5	0.0545	0.601	1	0.962555		43.5	0.0435	0.601	0	0.970674		0.00811942				0.607	0.96962	0.959646		0.959251	0.969366
								0.602	54.7	0.0547	0.602	0	0.962555		43.5	0.0435	0.602	1	0.971163		0.00860818				0.608	0.969739	0.959785		0.959392	0.969489
								0.603	54.8	0.0548	0.603	0	0.962555		43.5	0.0435	0.603	0	0.971163		0.00860818				0.609	0.969857	0.959923		0.959532	0.969612
								0.604	54.9	0.0549	0.604	0	0.962555		43.7	0.0437	0.604	0	0.971163		0.00860818				0.61	0.969974	0.96006		0.959672	0.969735
								0.605	55	0.055	0.605	0	0.962555		43.7	0.0437	0.605	1	0.971652		0.00909694				0.611	0.970092	0.960198		0.959811	0.969857
								0.606	55.2	0.0552	0.606	0	0.962555		43.7	0.0437	0.606	0	0.971652		0.00909694				0.612	0.970208	0.960334		0.95995	0.969978
								0.607	55.2	0.0552	0.607	0	0.962555		43.8	0.0438	0.607	1	0.972141		0.0095857				0.613	0.970324	0.96047		0.960088	0.970099
								0.608	55.4	0.0554	0.608	0	0.962555		43.9	0.0439	0.608	0	0.972141		0.0095857				0.614	0.97044	0.960606		0.960226	0.97022
								0.609	55.5	0.0555	0.609	1	0.963106		44	0.044	0.609	0	0.972141		0.00903504				0.615	0.970555	0.960741		0.960363	0.97034
								0.61	55.6	0.0556	0.61	0	0.963106		44.1	0.0441	0.61	0	0.972141		0.00903504				0.616	0.97067	0.960875		0.9605	0.970459
								0.611	55.7	0.0557	0.611	0	0.963106		44.1	0.0441	0.611	0	0.972141		0.00903504				0.617	0.970784	0.961009		0.960636	0.970578
								0.612	55.7	0.0557	0.612	2	0.964207		44.1	0.0441	0.612	0	0.972141		0.00793371				0.618	0.970898	0.961142		0.960771	0.970697
								0.613	55.7	0.0557	0.613	0	0.964207		44.1	0.0441	0.613	0	0.972141		0.00793371				0.619	0.971011	0.961275		0.960906	0.970815
								0.614	55.8	0.0558	0.614	0	0.964207		44.2	0.0442	0.614	0	0.972141		0.00793371				0.62	0.971124	0.961407		0.961041	0.970932
								0.615	55.8	0.0558	0.615	0	0.964207		44.2	0.0442	0.615	0	0.972141		0.00793371				0.621	0.971236	0.961539		0.961175	0.971049
								0.616	55.9	0.0559	0.616	0	0.964207		44.2	0.0442	0.616	0	0.972141		0.00793371				0.622	0.971348	0.96167		0.961308	0.971166
								0.617	55.9	0.0559	0.617	0	0.964207		44.3	0.0443	0.617	2	0.973118		0.00891123				0.623	0.971459	0.961801		0.961441	0.971282
								0.618	55.9	0.0559	0.618	1	0.964758		44.4	0.0444	0.618	0	0.973118		0.00836057				0.624	0.97157	0.961931		0.961574	0.971398
								0.619	56.2	0.0562	0.619	0	0.964758		44.4	0.0444	0.619	0	0.973118		0.00836057				0.625	0.97168	0.962061		0.961706	0.971513
								0.62	56.2	0.0562	0.62	0	0.964758		44.7	0.0447	0.62	0	0.973118		0.00836057				0.626	0.97179	0.96219		0.961837	0.971627
								0.621	56.2	0.0562	0.621	0	0.964758		44.8	0.0448	0.621	0	0.973118		0.00836057				0.627	0.9719	0.962319		0.961968	0.971742
								0.622	56.3	0.0563	0.622	0	0.964758		44.8	0.0448	0.622	0	0.973118		0.00836057				0.628	0.972009	0.962447		0.962098	0.971855
								0.623	56.3	0.0563	0.623	0	0.964758		44.9	0.0449	0.623	0	0.973118		0.00836057				0.629	0.972117	0.962575		0.962228	0.971969
								0.624	56.4	0.0564	0.624	0	0.964758		44.9	0.0449	0.624	0	0.973118		0.00836057				0.63	0.972225	0.962702		0.962358	0.972081
								0.625	56.5	0.0565	0.625	0	0.964758		44.9	0.0449	0.625	0	0.973118		0.00836057				0.631	0.972333	0.962829		0.962486	0.972194
								0.626	56.6	0.0566	0.626	0	0.964758		44.9	0.0449	0.626	0	0.973118		0.00836057				0.632	0.97244	0.962955		0.962615	0.972305
								0.627	56.6	0.0566	0.627	1	0.965308		45	0.045	0.627	0	0.973118		0.00780991				0.633	0.972547	0.963081		0.962743	0.972417
								0.628	56.7	0.0567	0.628	0	0.965308		45	0.045	0.628	0	0.973118		0.00780991				0.634	0.972653	0.963206		0.96287	0.972528
								0.629	56.8	0.0568	0.629	0	0.965308		45	0.045	0.629	0	0.973118		0.00780991				0.635	0.972759	0.963331		0.962997	0.972638
								0.63	57	0.057	0.63	0	0.965308		45.1	0.0451	0.63	0	0.973118		0.00780991				0.636	0.972864	0.963455		0.963124	0.972748
								0.631	57	0.057	0.631	0	0.965308		45.2	0.0452	0.631	0	0.973118		0.00780991				0.637	0.972969	0.963579		0.96325	0.972858
								0.632	57.1	0.0571	0.632	0	0.965308		45.3	0.0453	0.632	0	0.973118		0.00780991				0.638	0.973073	0.963702		0.963375	0.972967
								0.633	57.2	0.0572	0.633	0	0.965308		45.5	0.0455	0.633	1	0.973607		0.00829867				0.639	0.973177	0.963825		0.9635	0.973075
								0.634	57.3	0.0573	0.634	0	0.965308		45.5	0.0455	0.634	1	0.974096		0.00878743				0.64	0.973281	0.963947		0.963625	0.973184
								0.635	57.3	0.0573	0.635	0	0.965308		45.6	0.0456	0.635	0	0.974096		0.00878743				0.641	0.973384	0.964069		0.963749	0.973291
								0.636	57.4	0.0574	0.636	0	0.965308		45.7	0.0457	0.636	0	0.974096		0.00878743				0.642	0.973487	0.964191		0.963872	0.973399
								0.637	57.5	0.0575	0.637	0	0.965308		45.7	0.0457	0.637	1	0.974585		0.00927619				0.643	0.973589	0.964312		0.963996	0.973506
								0.638	57.5	0.0575	0.638	0	0.965308		45.7	0.0457	0.638	0	0.974585		0.00927619				0.644	0.973691	0.964432		0.964118	0.973612
								0.639	57.6	0.0576	0.639	0	0.965308		45.8	0.0458	0.639	0	0.974585		0.00927619				0.645	0.973793	0.964552		0.96424	0.973718
								0.64	57.6	0.0576	0.64	0	0.965308		45.9	0.0459	0.64	0	0.974585		0.00927619				0.646	0.973894	0.964672		0.964362	0.973824
								0.641	57.8	0.0578	0.641	0	0.965308		45.9	0.0459	0.641	0	0.974585		0.00927619				0.647	0.973994	0.964791		0.964484	0.973929
								0.642	57.9	0.0579	0.642	0	0.965308		46.1	0.0461	0.642	0	0.974585		0.00927619				0.648	0.974094	0.964909		0.964604	0.974033
								0.643	57.9	0.0579	0.643	0	0.965308		46.1	0.0461	0.643	0	0.974585		0.00927619				0.649	0.974194	0.965028		0.964725	0.974138
								0.644	58	0.058	0.644	0	0.965308		46.1	0.0461	0.644	0	0.974585		0.00927619				0.65	0.974293	0.965145		0.964845	0.974241
								0.645	58.1	0.0581	0.645	0	0.965308		46.1	0.0461	0.645	0	0.974585		0.00927619				0.651	0.974392	0.965263		0.964964	0.974345
								0.646	58.1	0.0581	0.646	0	0.965308		46.1	0.0461	0.646	0	0.974585		0.00927619				0.652	0.974491	0.965379		0.965083	0.974448
								0.647	58.2	0.0582	0.647	0	0.965308		46.3	0.0463	0.647	0	0.974585		0.00927619				0.653	0.974589	0.965496		0.965202	0.97455
								0.648	58.2	0.0582	0.648	0	0.965308		46.3	0.0463	0.648	0	0.974585		0.00927619				0.654	0.974687	0.965612		0.96532	0.974653
								0.649	58.2	0.0582	0.649	0	0.965308		46.4	0.0464	0.649	1	0.975073		0.00976494				0.655	0.974784	0.965727		0.965438	0.974754
								0.65	58.6	0.0586	0.65	0	0.965308		46.5	0.0465	0.65	1	0.975562		0.0102537				0.656	0.974881	0.965842		0.965555	0.974856
								0.651	58.6	0.0586	0.651	0	0.965308		46.7	0.0467	0.651	0	0.975562		0.0102537				0.657	0.974977	0.965957		0.965672	0.974956
								0.652	58.7	0.0587	0.652	0	0.965308		46.8	0.0468	0.652	0	0.975562		0.0102537				0.658	0.975073	0.966071		0.965788	0.975057
								0.653	58.8	0.0588	0.653	2	0.96641		46.9	0.0469	0.653	0	0.975562		0.00915238				0.659	0.975169	0.966185		0.965904	0.975157
								0.654	58.8	0.0588	0.654	0	0.96641		47.1	0.0471	0.654	0	0.975562		0.00915238				0.66	0.975264	0.966298		0.96602	0.975257
								0.655	59	0.059	0.655	0	0.96641		47.2	0.0472	0.655	0	0.975562		0.00915238				0.661	0.975359	0.966411		0.966135	0.975356
								0.656	59.1	0.0591	0.656	0	0.96641		47.2	0.0472	0.656	0	0.975562		0.00915238				0.662	0.975453	0.966524		0.96625	0.975455
								0.657	59.7	0.0597	0.657	0	0.96641		47.4	0.0474	0.657	0	0.975562		0.00915238				0.663	0.975547	0.966636		0.966364	0.975553
								0.658	59.9	0.0599	0.658	0	0.96641		47.4	0.0474	0.658	0	0.975562		0.00915238				0.664	0.975641	0.966747		0.966478	0.975651
								0.659	60	0.06	0.659	0	0.96641		47.6	0.0476	0.659	0	0.975562		0.00915238				0.665	0.975734	0.966859		0.966591	0.975749
								0.66	60.2	0.0602	0.66	0	0.96641		47.7	0.0477	0.66	0	0.975562		0.00915238				0.666	0.975827	0.966969		0.966704	0.975846
								0.661	60.4	0.0604	0.661	0	0.96641		47.7	0.0477	0.661	0	0.975562		0.00915238				0.667	0.97592	0.96708		0.966817	0.975943
								0.662	61.2	0.0612	0.662	0	0.96641		47.7	0.0477	0.662	0	0.975562		0.00915238				0.668	0.976012	0.96719		0.966929	0.976039
								0.663	61.3	0.0613	0.663	0	0.96641		47.8	0.0478	0.663	0	0.975562		0.00915238				0.669	0.976104	0.967299		0.967041	0.976135
								0.664	61.5	0.0615	0.664	0	0.96641		47.8	0.0478	0.664	0	0.975562		0.00915238				0.67	0.976195	0.967408		0.967152	0.976231
								0.665	61.5	0.0615	0.665	0	0.96641		48	0.048	0.665	0	0.975562		0.00915238				0.671	0.976286	0.967517		0.967263	0.976326
								0.666	61.6	0.0616	0.666	0	0.96641		48	0.048	0.666	0	0.975562		0.00915238				0.672	0.976377	0.967625		0.967373	0.976421
								0.667	61.6	0.0616	0.667	0	0.96641		48.1	0.0481	0.667	0	0.975562		0.00915238				0.673	0.976467	0.967733		0.967483	0.976516
								0.668	61.6	0.0616	0.668	0	0.96641		48.2	0.0482	0.668	0	0.975562		0.00915238				0.674	0.976557	0.967841		0.967593	0.97661
								0.669	61.9	0.0619	0.669	1	0.96696		48.2	0.0482	0.669	0	0.975562		0.00860172				0.675	0.976646	0.967948		0.967702	0.976704
								0.67	61.9	0.0619	0.67	0	0.96696		48.2	0.0482	0.67	0	0.975562		0.00860172				0.676	0.976735	0.968055		0.967811	0.976797
								0.671	61.9	0.0619	0.671	2	0.968062		48.2	0.0482	0.671	0	0.975562		0.0075004				0.677	0.976824	0.968161		0.96792	0.97689
								0.672	62.1	0.0621	0.672	0	0.968062		48.3	0.0483	0.672	2	0.97654		0.00847792				0.678	0.976912	0.968267		0.968028	0.976982
								0.673	62.1	0.0621	0.673	0	0.968062		48.3	0.0483	0.673	0	0.97654		0.00847792				0.679	0.977	0.968372		0.968136	0.977075
								0.674	62.2	0.0622	0.674	0	0.968062		48.4	0.0484	0.674	1	0.977028		0.00896667				0.68	0.977088	0.968478		0.968243	0.977167
								0.675	62.3	0.0623	0.675	0	0.968062		48.4	0.0484	0.675	0	0.977028		0.00896667				0.681	0.977175	0.968582		0.96835	0.977258
								0.676	62.3	0.0623	0.676	0	0.968062		48.6	0.0486	0.676	0	0.977028		0.00896667				0.682	0.977262	0.968687		0.968456	0.977349
								0.677	62.5	0.0625	0.677	2	0.969163		48.6	0.0486	0.677	0	0.977028		0.00786535				0.683	0.977349	0.968791		0.968563	0.97744
								0.678	62.6	0.0626	0.678	0	0.969163		48.6	0.0486	0.678	0	0.977028		0.00786535				0.684	0.977435	0.968894		0.968668	0.97753
								0.679	62.6	0.0626	0.679	0	0.969163		48.8	0.0488	0.679	0	0.977028		0.00786535				0.685	0.977521	0.968997		0.968774	0.97762
								0.68	62.7	0.0627	0.68	0	0.969163		48.9	0.0489	0.68	1	0.977517		0.00835411				0.686	0.977606	0.9691		0.968879	0.97771
								0.681	62.7	0.0627	0.681	0	0.969163		48.9	0.0489	0.681	0	0.977517		0.00835411				0.687	0.977691	0.969203		0.968983	0.977799
								0.682	62.7	0.0627	0.682	0	0.969163		49.1	0.0491	0.682	0	0.977517		0.00835411				0.688	0.977776	0.969305		0.969088	0.977888
								0.683	62.7	0.0627	0.683	0	0.969163		49.2	0.0492	0.683	1	0.978006		0.00884287				0.689	0.977861	0.969406		0.969191	0.977976
								0.684	62.7	0.0627	0.684	0	0.969163		49.2	0.0492	0.684	0	0.978006		0.00884287				0.69	0.977945	0.969508		0.969295	0.978065
								0.685	62.9	0.0629	0.685	0	0.969163		49.2	0.0492	0.685	0	0.978006		0.00884287				0.691	0.978028	0.969609		0.969398	0.978152
								0.686	63	0.063	0.686	0	0.969163		49.2	0.0492	0.686	0	0.978006		0.00884287				0.692	0.978112	0.969709		0.969501	0.97824
								0.687	63.3	0.0633	0.687	0	0.969163		49.3	0.0493	0.687	0	0.978006		0.00884287				0.693	0.978195	0.969809		0.969603	0.978327
								0.688	63.3	0.0633	0.688	0	0.969163		49.4	0.0494	0.688	0	0.978006		0.00884287				0.694	0.978277	0.969909		0.969705	0.978414
								0.689	63.5	0.0635	0.689	0	0.969163		49.4	0.0494	0.689	1	0.978495		0.00933163				0.695	0.97836	0.970009		0.969807	0.9785
								0.69	63.7	0.0637	0.69	0	0.969163		49.5	0.0495	0.69	0	0.978495		0.00933163				0.696	0.978442	0.970108		0.969908	0.978586
								0.691	63.9	0.0639	0.691	0	0.969163		49.5	0.0495	0.691	0	0.978495		0.00933163				0.697	0.978523	0.970207		0.970009	0.978672
								0.692	63.9	0.0639	0.692	0	0.969163		49.5	0.0495	0.692	0	0.978495		0.00933163				0.698	0.978605	0.970305		0.970109	0.978757
								0.693	64	0.064	0.693	0	0.969163		49.6	0.0496	0.693	0	0.978495		0.00933163				0.699	0.978686	0.970403		0.970209	0.978842
								0.694	64.1	0.0641	0.694	0	0.969163		49.6	0.0496	0.694	0	0.978495		0.00933163				0.7	0.978766	0.970501		0.970309	0.978927
								0.695	64.4	0.0644	0.695	1	0.969714		49.7	0.0497	0.695	0	0.978495		0.00878097				0.701	0.978847	0.970598		0.970409	0.979011
								0.696	64.4	0.0644	0.696	0	0.969714		49.9	0.0499	0.696	0	0.978495		0.00878097				0.702	0.978927	0.970695		0.970508	0.979095
								0.697	64.5	0.0645	0.697	0	0.969714		50	0.05	0.697	0	0.978495		0.00878097				0.703	0.979007	0.970791		0.970606	0.979179
								0.698	64.5	0.0645	0.698	0	0.969714		50.1	0.0501	0.698	0	0.978495		0.00878097				0.704	0.979086	0.970888		0.970705	0.979262
								0.699	64.6	0.0646	0.699	0	0.969714		50.1	0.0501	0.699	0	0.978495		0.00878097				0.705	0.979165	0.970984		0.970803	0.979345
								0.7	64.6	0.0646	0.7	0	0.969714		50.1	0.0501	0.7	0	0.978495		0.00878097				0.706	0.979244	0.971079		0.970901	0.979427
								0.701	64.7	0.0647	0.701	0	0.969714		50.3	0.0503	0.701	0	0.978495		0.00878097				0.707	0.979322	0.971174		0.970998	0.97951
								0.702	64.8	0.0648	0.702	0	0.969714		50.3	0.0503	0.702	1	0.978983		0.00926973				0.708	0.9794	0.971269		0.971095	0.979592
								0.703	64.8	0.0648	0.703	0	0.969714		50.3	0.0503	0.703	0	0.978983		0.00926973				0.709	0.979478	0.971364		0.971191	0.979673
								0.704	64.9	0.0649	0.704	0	0.969714		50.4	0.0504	0.704	0	0.978983		0.00926973				0.71	0.979555	0.971458		0.971288	0.979755
								0.705	65	0.065	0.705	1	0.970264		50.4	0.0504	0.705	0	0.978983		0.00871907				0.711	0.979632	0.971552		0.971384	0.979836
								0.706	65.1	0.0651	0.706	0	0.970264		50.5	0.0505	0.706	0	0.978983		0.00871907				0.712	0.979709	0.971645		0.971479	0.979916
								0.707	65.2	0.0652	0.707	1	0.970815		50.6	0.0506	0.707	0	0.978983		0.0081684				0.713	0.979785	0.971738		0.971574	0.979996
								0.708	65.2	0.0652	0.708	0	0.970815		50.7	0.0507	0.708	0	0.978983		0.0081684				0.714	0.979862	0.971831		0.971669	0.980076
								0.709	65.2	0.0652	0.709	0	0.970815		50.7	0.0507	0.709	0	0.978983		0.0081684				0.715	0.979937	0.971923		0.971764	0.980156
								0.71	65.3	0.0653	0.71	0	0.970815		50.9	0.0509	0.71	0	0.978983		0.0081684				0.716	0.980013	0.972016		0.971858	0.980235
								0.711	65.3	0.0653	0.711	0	0.970815		50.9	0.0509	0.711	0	0.978983		0.0081684				0.717	0.980088	0.972107		0.971952	0.980314
								0.712	65.3	0.0653	0.712	0	0.970815		51	0.051	0.712	0	0.978983		0.0081684				0.718	0.980163	0.972199		0.972046	0.980393
								0.713	65.4	0.0654	0.713	1	0.971366		51.3	0.0513	0.713	0	0.978983		0.00761774				0.719	0.980238	0.97229		0.972139	0.980471
								0.714	65.4	0.0654	0.714	0	0.971366		51.3	0.0513	0.714	1	0.979472		0.0081065				0.72	0.980312	0.972381		0.972232	0.98055
								0.715	65.5	0.0655	0.715	0	0.971366		51.4	0.0514	0.715	0	0.979472		0.0081065				0.721	0.980386	0.972471		0.972324	0.980627
								0.716	65.7	0.0657	0.716	0	0.971366		51.5	0.0515	0.716	0	0.979472		0.0081065				0.722	0.98046	0.972561		0.972417	0.980705
								0.717	65.8	0.0658	0.717	0	0.971366		51.5	0.0515	0.717	0	0.979472		0.0081065				0.723	0.980533	0.972651		0.972508	0.980782
								0.718	65.9	0.0659	0.718	0	0.971366		51.6	0.0516	0.718	0	0.979472		0.0081065				0.724	0.980606	0.972741		0.9726	0.980859
								0.719	66.1	0.0661	0.719	0	0.971366		51.6	0.0516	0.719	1	0.979961		0.00859526				0.725	0.980679	0.97283		0.972691	0.980935
								0.72	66.2	0.0662	0.72	0	0.971366		51.7	0.0517	0.72	0	0.979961		0.00859526				0.726	0.980751	0.972919		0.972782	0.981011
								0.721	66.5	0.0665	0.721	0	0.971366		51.7	0.0517	0.721	0	0.979961		0.00859526				0.727	0.980823	0.973007		0.972873	0.981087
								0.722	66.8	0.0668	0.722	1	0.971916		51.8	0.0518	0.722	0	0.979961		0.0080446				0.728	0.980895	0.973095		0.972963	0.981163
								0.723	66.8	0.0668	0.723	0	0.971916		52	0.052	0.723	0	0.979961		0.0080446				0.729	0.980967	0.973183		0.973053	0.981238
								0.724	66.8	0.0668	0.724	0	0.971916		52	0.052	0.724	0	0.979961		0.0080446				0.73	0.981038	0.973271		0.973143	0.981313
								0.725	66.9	0.0669	0.725	0	0.971916		52	0.052	0.725	0	0.979961		0.0080446				0.731	0.981109	0.973358		0.973232	0.981388
								0.726	67	0.067	0.726	0	0.971916		52.1	0.0521	0.726	0	0.979961		0.0080446				0.732	0.98118	0.973445		0.973321	0.981462
								0.727	67.3	0.0673	0.727	0	0.971916		52.1	0.0521	0.727	0	0.979961		0.0080446				0.733	0.98125	0.973532		0.97341	0.981536
								0.728	67.4	0.0674	0.728	0	0.971916		52.2	0.0522	0.728	1	0.98045		0.00853336				0.734	0.98132	0.973618		0.973498	0.98161
								0.729	67.4	0.0674	0.729	1	0.972467		52.3	0.0523	0.729	0	0.98045		0.0079827				0.735	0.98139	0.973704		0.973586	0.981683
								0.73	67.4	0.0674	0.73	0	0.972467		52.3	0.0523	0.73	0	0.98045		0.0079827				0.736	0.98146	0.97379		0.973674	0.981756
								0.731	67.5	0.0675	0.731	0	0.972467		52.4	0.0524	0.731	0	0.98045		0.0079827				0.737	0.981529	0.973875		0.973762	0.981829
								0.732	67.8	0.0678	0.732	0	0.972467		52.4	0.0524	0.732	0	0.98045		0.0079827				0.738	0.981598	0.973961		0.973849	0.981902
								0.733	67.9	0.0679	0.733	1	0.973018		52.6	0.0526	0.733	0	0.98045		0.00743204				0.739	0.981667	0.974045		0.973936	0.981974
								0.734	68.1	0.0681	0.734	0	0.973018		52.6	0.0526	0.734	0	0.98045		0.00743204				0.74	0.981735	0.97413		0.974022	0.982046
								0.735	68.4	0.0684	0.735	1	0.973568		52.7	0.0527	0.735	0	0.98045		0.00688138				0.741	0.981803	0.974214		0.974109	0.982118
								0.736	68.5	0.0685	0.736	0	0.973568		52.7	0.0527	0.736	0	0.98045		0.00688138				0.742	0.981871	0.974298		0.974194	0.982189
								0.737	68.6	0.0686	0.737	0	0.973568		52.7	0.0527	0.737	0	0.98045		0.00688138				0.743	0.981939	0.974382		0.97428	0.98226
								0.738	68.9	0.0689	0.738	0	0.973568		52.8	0.0528	0.738	0	0.98045		0.00688138				0.744	0.982006	0.974465		0.974365	0.982331
								0.739	69	0.069	0.739	0	0.973568		53.1	0.0531	0.739	0	0.98045		0.00688138				0.745	0.982073	0.974548		0.974451	0.982402
								0.74	69.1	0.0691	0.74	0	0.973568		53.2	0.0532	0.74	1	0.980938		0.00737013				0.746	0.98214	0.974631		0.974535	0.982472
								0.741	69.3	0.0693	0.741	0	0.973568		53.3	0.0533	0.741	1	0.981427		0.00785889				0.747	0.982206	0.974713		0.97462	0.982542
								0.742	69.3	0.0693	0.742	0	0.973568		53.7	0.0537	0.742	1	0.981916		0.00834765				0.748	0.982273	0.974795		0.974704	0.982612
								0.743	69.4	0.0694	0.743	0	0.973568		53.8	0.0538	0.743	0	0.981916		0.00834765				0.749	0.982339	0.974877		0.974788	0.982681
								0.744	69.4	0.0694	0.744	0	0.973568		53.9	0.0539	0.744	0	0.981916		0.00834765				0.75	0.982404	0.974959		0.974871	0.98275
								0.745	69.5	0.0695	0.745	0	0.973568		54	0.054	0.745	0	0.981916		0.00834765				0.751	0.98247	0.97504		0.974955	0.982819
								0.746	69.5	0.0695	0.746	0	0.973568		54.2	0.0542	0.746	0	0.981916		0.00834765				0.752	0.982535	0.975121		0.975038	0.982888
								0.747	69.5	0.0695	0.747	0	0.973568		54.2	0.0542	0.747	0	0.981916		0.00834765				0.753	0.9826	0.975202		0.97512	0.982956
								0.748	69.7	0.0697	0.748	0	0.973568		54.2	0.0542	0.748	0	0.981916		0.00834765				0.754	0.982664	0.975282		0.975203	0.983024
								0.749	69.8	0.0698	0.749	0	0.973568		54.2	0.0542	0.749	0	0.981916		0.00834765				0.755	0.982729	0.975362		0.975285	0.983092
								0.75	70	0.07	0.75	0	0.973568		54.3	0.0543	0.75	0	0.981916		0.00834765				0.756	0.982793	0.975442		0.975367	0.983159
								0.751	70.1	0.0701	0.751	0	0.973568		54.3	0.0543	0.751	0	0.981916		0.00834765				0.757	0.982857	0.975522		0.975448	0.983226
								0.752	70.2	0.0702	0.752	0	0.973568		54.4	0.0544	0.752	0	0.981916		0.00834765				0.758	0.98292	0.975601		0.975529	0.983293
								0.753	70.3	0.0703	0.753	0	0.973568		54.4	0.0544	0.753	0	0.981916		0.00834765				0.759	0.982983	0.97568		0.97561	0.98336
								0.754	70.3	0.0703	0.754	0	0.973568		54.5	0.0545	0.754	0	0.981916		0.00834765				0.76	0.983046	0.975759		0.975691	0.983427
								0.755	70.4	0.0704	0.755	0	0.973568		54.6	0.0546	0.755	0	0.981916		0.00834765				0.761	0.983109	0.975837		0.975772	0.983493
								0.756	70.4	0.0704	0.756	1	0.974119		54.8	0.0548	0.756	0	0.981916		0.00779699				0.762	0.983172	0.975915		0.975852	0.983559
								0.757	70.6	0.0706	0.757	0	0.974119		55	0.055	0.757	1	0.982405		0.00828575				0.763	0.983234	0.975993		0.975932	0.983624
								0.758	70.6	0.0706	0.758	0	0.974119		55	0.055	0.758	0	0.982405		0.00828575				0.764	0.983296	0.976071		0.976011	0.98369
								0.759	70.6	0.0706	0.759	0	0.974119		55.2	0.0552	0.759	0	0.982405		0.00828575				0.765	0.983358	0.976148		0.976091	0.983755
								0.76	70.6	0.0706	0.76	0	0.974119		55.3	0.0553	0.76	0	0.982405		0.00828575				0.766	0.983419	0.976225		0.97617	0.983819
								0.761	70.7	0.0707	0.761	0	0.974119		55.3	0.0553	0.761	1	0.982893		0.00877451				0.767	0.983481	0.976302		0.976248	0.983884
								0.762	71.2	0.0712	0.762	0	0.974119		55.4	0.0554	0.762	0	0.982893		0.00877451				0.768	0.983542	0.976379		0.976327	0.983948
								0.763	71.4	0.0714	0.763	1	0.97467		55.4	0.0554	0.763	0	0.982893		0.00822385				0.769	0.983602	0.976455		0.976405	0.984012
								0.764	71.4	0.0714	0.764	0	0.97467		55.5	0.0555	0.764	0	0.982893		0.00822385				0.77	0.983663	0.976531		0.976483	0.984076
								0.765	71.5	0.0715	0.765	0	0.97467		55.7	0.0557	0.765	0	0.982893		0.00822385				0.771	0.983723	0.976607		0.976561	0.98414
								0.766	71.6	0.0716	0.766	0	0.97467		55.9	0.0559	0.766	0	0.982893		0.00822385				0.772	0.983783	0.976682		0.976638	0.984203
								0.767	72	0.072	0.767	0	0.97467		55.9	0.0559	0.767	0	0.982893		0.00822385				0.773	0.983843	0.976758		0.976715	0.984266
								0.768	72	0.072	0.768	0	0.97467		56	0.056	0.768	0	0.982893		0.00822385				0.774	0.983903	0.976833		0.976792	0.984329
								0.769	72.1	0.0721	0.769	0	0.97467		56	0.056	0.769	0	0.982893		0.00822385				0.775	0.983962	0.976907		0.976869	0.984391
								0.77	72.3	0.0723	0.77	0	0.97467		56.1	0.0561	0.77	0	0.982893		0.00822385				0.776	0.984021	0.976982		0.976945	0.984454
								0.771	72.4	0.0724	0.771	0	0.97467		56.4	0.0564	0.771	0	0.982893		0.00822385				0.777	0.98408	0.977056		0.977021	0.984516
								0.772	72.5	0.0725	0.772	0	0.97467		56.5	0.0565	0.772	0	0.982893		0.00822385				0.778	0.984138	0.97713		0.977097	0.984577
								0.773	72.6	0.0726	0.773	0	0.97467		56.5	0.0565	0.773	1	0.983382		0.00871261				0.779	0.984197	0.977204		0.977173	0.984639
								0.774	72.7	0.0727	0.774	0	0.97467		56.7	0.0567	0.774	1	0.983871		0.00920136				0.78	0.984255	0.977277		0.977248	0.9847
								0.775	72.9	0.0729	0.775	1	0.97522		56.8	0.0568	0.775	0	0.983871		0.0086507				0.781	0.984313	0.97735		0.977323	0.984761
								0.776	73.1	0.0731	0.776	0	0.97522		56.8	0.0568	0.776	0	0.983871		0.0086507				0.782	0.98437	0.977423		0.977398	0.984822
								0.777	73.2	0.0732	0.777	0	0.97522		57	0.057	0.777	0	0.983871		0.0086507				0.783	0.984428	0.977496		0.977472	0.984882
								0.778	73.3	0.0733	0.778	0	0.97522		57.1	0.0571	0.778	0	0.983871		0.0086507				0.784	0.984485	0.977568		0.977547	0.984943
								0.779	73.3	0.0733	0.779	0	0.97522		57.1	0.0571	0.779	0	0.983871		0.0086507				0.785	0.984542	0.97764		0.977621	0.985003
								0.78	73.8	0.0738	0.78	1	0.975771		57.2	0.0572	0.78	0	0.983871		0.00810004				0.786	0.984599	0.977712		0.977694	0.985063
								0.781	73.8	0.0738	0.781	0	0.975771		57.3	0.0573	0.781	1	0.98436		0.0085888				0.787	0.984655	0.977784		0.977768	0.985122
								0.782	73.8	0.0738	0.782	0	0.975771		57.4	0.0574	0.782	0	0.98436		0.0085888				0.788	0.984711	0.977855		0.977841	0.985181
								0.783	73.9	0.0739	0.783	0	0.975771		57.4	0.0574	0.783	0	0.98436		0.0085888				0.789	0.984767	0.977926		0.977914	0.985241
								0.784	74.2	0.0742	0.784	1	0.976322		57.5	0.0575	0.784	0	0.98436		0.00803814				0.79	0.984823	0.977997		0.977987	0.985299
								0.785	74.2	0.0742	0.785	0	0.976322		57.7	0.0577	0.785	1	0.984848		0.0085269				0.791	0.984879	0.978068		0.978059	0.985358
								0.786	74.3	0.0743	0.786	1	0.976872		57.7	0.0577	0.786	0	0.984848		0.00797624				0.792	0.984934	0.978138		0.978132	0.985416
								0.787	74.4	0.0744	0.787	0	0.976872		57.9	0.0579	0.787	0	0.984848		0.00797624				0.793	0.984989	0.978208		0.978204	0.985475
								0.788	74.5	0.0745	0.788	0	0.976872		58.1	0.0581	0.788	0	0.984848		0.00797624				0.794	0.985044	0.978278		0.978275	0.985533
								0.789	74.5	0.0745	0.789	1	0.977423		58.2	0.0582	0.789	0	0.984848		0.00742558				0.795	0.985099	0.978348		0.978347	0.98559
								0.79	74.6	0.0746	0.79	0	0.977423		58.3	0.0583	0.79	0	0.984848		0.00742558				0.796	0.985153	0.978417		0.978418	0.985648
								0.791	74.6	0.0746	0.791	0	0.977423		58.4	0.0584	0.791	0	0.984848		0.00742558				0.797	0.985207	0.978487		0.978489	0.985705
								0.792	74.7	0.0747	0.792	0	0.977423		58.4	0.0584	0.792	0	0.984848		0.00742558				0.798	0.985261	0.978556		0.97856	0.985762
								0.793	74.8	0.0748	0.793	0	0.977423		58.5	0.0585	0.793	2	0.985826		0.00840309				0.799	0.985315	0.978624		0.978631	0.985819
								0.794	75	0.075	0.794	1	0.977974		58.6	0.0586	0.794	0	0.985826		0.00785243				0.8	0.985369	0.978693		0.978701	0.985875
								0.795	75.2	0.0752	0.795	0	0.977974		58.6	0.0586	0.795	0	0.985826		0.00785243				0.801	0.985422	0.978761		0.978771	0.985932
								0.796	75.4	0.0754	0.796	0	0.977974		58.6	0.0586	0.796	0	0.985826		0.00785243				0.802	0.985475	0.978829		0.978841	0.985988
								0.797	75.5	0.0755	0.797	0	0.977974		58.6	0.0586	0.797	0	0.985826		0.00785243				0.803	0.985528	0.978897		0.97891	0.986043
								0.798	75.6	0.0756	0.798	0	0.977974		59.1	0.0591	0.798	0	0.985826		0.00785243				0.804	0.985581	0.978964		0.97898	0.986099
								0.799	75.7	0.0757	0.799	0	0.977974		59.2	0.0592	0.799	0	0.985826		0.00785243				0.805	0.985633	0.979032		0.979049	0.986155
								0.8	75.8	0.0758	0.8	0	0.977974		59.2	0.0592	0.8	0	0.985826		0.00785243				0.806	0.985686	0.979099		0.979118	0.98621
								0.801	76	0.076	0.801	0	0.977974		59.3	0.0593	0.801	0	0.985826		0.00785243				0.807	0.985738	0.979166		0.979186	0.986265
								0.802	76	0.076	0.802	0	0.977974		59.4	0.0594	0.802	1	0.986315		0.00834119				0.808	0.985789	0.979232		0.979255	0.986319
								0.803	76.2	0.0762	0.803	1	0.978524		59.5	0.0595	0.803	0	0.986315		0.00779053				0.809	0.985841	0.979299		0.979323	0.986374
								0.804	76.2	0.0762	0.804	0	0.978524		59.6	0.0596	0.804	0	0.986315		0.00779053				0.81	0.985893	0.979365		0.979391	0.986428
								0.805	76.3	0.0763	0.805	0	0.978524		59.7	0.0597	0.805	0	0.986315		0.00779053				0.811	0.985944	0.979431		0.979459	0.986482
								0.806	76.4	0.0764	0.806	0	0.978524		59.7	0.0597	0.806	0	0.986315		0.00779053				0.812	0.985995	0.979496		0.979526	0.986536
								0.807	76.4	0.0764	0.807	0	0.978524		59.8	0.0598	0.807	0	0.986315		0.00779053				0.813	0.986046	0.979562		0.979594	0.98659
								0.808	76.7	0.0767	0.808	0	0.978524		59.8	0.0598	0.808	0	0.986315		0.00779053				0.814	0.986096	0.979627		0.979661	0.986643
								0.809	76.7	0.0767	0.809	0	0.978524		59.9	0.0599	0.809	0	0.986315		0.00779053				0.815	0.986147	0.979692		0.979727	0.986697
								0.81	76.8	0.0768	0.81	0	0.978524		60	0.06	0.81	0	0.986315		0.00779053				0.816	0.986197	0.979757		0.979794	0.98675
								0.811	76.8	0.0768	0.811	1	0.979075		60	0.06	0.811	0	0.986315		0.00723987				0.817	0.986247	0.979822		0.97986	0.986802
								0.812	76.9	0.0769	0.812	0	0.979075		60.1	0.0601	0.812	0	0.986315		0.00723987				0.818	0.986297	0.979886		0.979926	0.986855
								0.813	77	0.077	0.813	0	0.979075		60.1	0.0601	0.813	0	0.986315		0.00723987				0.819	0.986346	0.97995		0.979992	0.986907
								0.814	77.1	0.0771	0.814	0	0.979075		60.3	0.0603	0.814	1	0.986804		0.00772863				0.82	0.986396	0.980014		0.980058	0.98696
								0.815	77.3	0.0773	0.815	0	0.979075		60.3	0.0603	0.815	0	0.986804		0.00772863				0.821	0.986445	0.980078		0.980123	0.987012
								0.816	77.4	0.0774	0.816	0	0.979075		60.5	0.0605	0.816	0	0.986804		0.00772863				0.822	0.986494	0.980141		0.980189	0.987063
								0.817	77.4	0.0774	0.817	0	0.979075		60.7	0.0607	0.817	0	0.986804		0.00772863				0.823	0.986542	0.980205		0.980254	0.987115
								0.818	77.5	0.0775	0.818	1	0.979626		60.7	0.0607	0.818	0	0.986804		0.00717797				0.824	0.986591	0.980268		0.980318	0.987166
								0.819	77.8	0.0778	0.819	1	0.980176		60.7	0.0607	0.819	0	0.986804		0.00662731				0.825	0.986639	0.980331		0.980383	0.987217
								0.82	77.8	0.0778	0.82	0	0.980176		60.9	0.0609	0.82	0	0.986804		0.00662731				0.826	0.986688	0.980393		0.980447	0.987268
								0.821	77.9	0.0779	0.821	0	0.980176		60.9	0.0609	0.821	0	0.986804		0.00662731				0.827	0.986736	0.980456		0.980512	0.987319
								0.822	78	0.078	0.822	0	0.980176		61.1	0.0611	0.822	0	0.986804		0.00662731				0.828	0.986783	0.980518		0.980575	0.98737
								0.823	78.1	0.0781	0.823	0	0.980176		61.1	0.0611	0.823	1	0.987292		0.00711607				0.829	0.986831	0.98058		0.980639	0.98742
								0.824	78.1	0.0781	0.824	0	0.980176		61.2	0.0612	0.824	0	0.987292		0.00711607				0.83	0.986879	0.980642		0.980703	0.98747
								0.825	78.2	0.0782	0.825	0	0.980176		61.6	0.0616	0.825	0	0.987292		0.00711607				0.831	0.986926	0.980703		0.980766	0.98752
								0.826	78.2	0.0782	0.826	0	0.980176		61.7	0.0617	0.826	1	0.987781		0.00760482				0.832	0.986973	0.980765		0.980829	0.98757
								0.827	78.3	0.0783	0.827	1	0.980727		61.8	0.0618	0.827	0	0.987781		0.00705416				0.833	0.98702	0.980826		0.980892	0.987619
								0.828	78.3	0.0783	0.828	0	0.980727		61.8	0.0618	0.828	0	0.987781		0.00705416				0.834	0.987066	0.980887		0.980954	0.987669
								0.829	78.5	0.0785	0.829	0	0.980727		61.9	0.0619	0.829	0	0.987781		0.00705416				0.835	0.987113	0.980947		0.981017	0.987718
								0.83	78.8	0.0788	0.83	0	0.980727		62.2	0.0622	0.83	0	0.987781		0.00705416				0.836	0.987159	0.981008		0.981079	0.987767
								0.831	78.8	0.0788	0.831	0	0.980727		62.2	0.0622	0.831	0	0.987781		0.00705416				0.837	0.987205	0.981068		0.981141	0.987815
								0.832	78.9	0.0789	0.832	0	0.980727		62.3	0.0623	0.832	0	0.987781		0.00705416				0.838	0.987251	0.981128		0.981203	0.987864
								0.833	79	0.079	0.833	0	0.980727		62.4	0.0624	0.833	0	0.987781		0.00705416				0.839	0.987297	0.981188		0.981265	0.987912
								0.834	79	0.079	0.834	0	0.980727		62.6	0.0626	0.834	0	0.987781		0.00705416				0.84	0.987342	0.981248		0.981326	0.987961
								0.835	79.2	0.0792	0.835	0	0.980727		62.8	0.0628	0.835	0	0.987781		0.00705416				0.841	0.987388	0.981307		0.981387	0.988009
								0.836	79.9	0.0799	0.836	0	0.980727		62.9	0.0629	0.836	0	0.987781		0.00705416				0.842	0.987433	0.981367		0.981448	0.988056
								0.837	80	0.08	0.837	0	0.980727		62.9	0.0629	0.837	0	0.987781		0.00705416				0.843	0.987478	0.981426		0.981509	0.988104
								0.838	80.1	0.0801	0.838	0	0.980727		63.2	0.0632	0.838	0	0.987781		0.00705416				0.844	0.987523	0.981485		0.981569	0.988151
								0.839	80.3	0.0803	0.839	0	0.980727		63.2	0.0632	0.839	0	0.987781		0.00705416				0.845	0.987567	0.981543		0.98163	0.988198
								0.84	80.3	0.0803	0.84	0	0.980727		63.3	0.0633	0.84	0	0.987781		0.00705416				0.846	0.987612	0.981602		0.98169	0.988245
								0.841	80.5	0.0805	0.841	0	0.980727		63.5	0.0635	0.841	0	0.987781		0.00705416				0.847	0.987656	0.98166		0.98175	0.988292
								0.842	80.5	0.0805	0.842	0	0.980727		63.6	0.0636	0.842	0	0.987781		0.00705416				0.848	0.9877	0.981718		0.98181	0.988339
								0.843	80.6	0.0806	0.843	0	0.980727		63.7	0.0637	0.843	0	0.987781		0.00705416				0.849	0.987744	0.981776		0.981869	0.988385
								0.844	80.8	0.0808	0.844	0	0.980727		63.9	0.0639	0.844	0	0.987781		0.00705416				0.85	0.987788	0.981834		0.981928	0.988432
								0.845	80.9	0.0809	0.845	0	0.980727		64	0.064	0.845	0	0.987781		0.00705416				0.851	0.987831	0.981892		0.981988	0.988478
								0.846	80.9	0.0809	0.846	0	0.980727		64.1	0.0641	0.846	0	0.987781		0.00705416				0.852	0.987875	0.981949		0.982047	0.988524
								0.847	81	0.081	0.847	0	0.980727		64.1	0.0641	0.847	0	0.987781		0.00705416				0.853	0.987918	0.982006		0.982105	0.988569
								0.848	81	0.081	0.848	0	0.980727		64.1	0.0641	0.848	0	0.987781		0.00705416				0.854	0.987961	0.982063		0.982164	0.988615
								0.849	81	0.081	0.849	0	0.980727		64.1	0.0641	0.849	0	0.987781		0.00705416				0.855	0.988004	0.98212		0.982222	0.98866
								0.85	81.1	0.0811	0.85	0	0.980727		64.2	0.0642	0.85	0	0.987781		0.00705416				0.856	0.988046	0.982176		0.98228	0.988705
								0.851	81.2	0.0812	0.851	0	0.980727		64.2	0.0642	0.851	0	0.987781		0.00705416				0.857	0.988089	0.982233		0.982338	0.98875
								0.852	81.3	0.0813	0.852	0	0.980727		64.4	0.0644	0.852	0	0.987781		0.00705416				0.858	0.988131	0.982289		0.982396	0.988795
								0.853	81.3	0.0813	0.853	0	0.980727		64.4	0.0644	0.853	0	0.987781		0.00705416				0.859	0.988173	0.982345		0.982454	0.98884
								0.854	81.4	0.0814	0.854	0	0.980727		64.5	0.0645	0.854	0	0.987781		0.00705416				0.86	0.988215	0.982401		0.982511	0.988884
								0.855	81.4	0.0814	0.855	0	0.980727		64.5	0.0645	0.855	0	0.987781		0.00705416				0.861	0.988257	0.982456		0.982568	0.988929
								0.856	81.5	0.0815	0.856	0	0.980727		64.6	0.0646	0.856	0	0.987781		0.00705416				0.862	0.988299	0.982512		0.982625	0.988973
								0.857	81.5	0.0815	0.857	0	0.980727		64.6	0.0646	0.857	0	0.987781		0.00705416				0.863	0.98834	0.982567		0.982682	0.989017
								0.858	81.5	0.0815	0.858	0	0.980727		64.7	0.0647	0.858	0	0.987781		0.00705416				0.864	0.988382	0.982622		0.982739	0.98906
								0.859	81.5	0.0815	0.859	0	0.980727		64.7	0.0647	0.859	0	0.987781		0.00705416				0.865	0.988423	0.982677		0.982795	0.989104
								0.86	81.9	0.0819	0.86	0	0.980727		64.9	0.0649	0.86	0	0.987781		0.00705416				0.866	0.988464	0.982731		0.982851	0.989147
								0.861	82.1	0.0821	0.861	0	0.980727		64.9	0.0649	0.861	1	0.98827		0.00754292				0.867	0.988505	0.982786		0.982907	0.989191
								0.862	82.3	0.0823	0.862	1	0.981278		65	0.065	0.862	0	0.98827		0.00699226				0.868	0.988545	0.98284		0.982963	0.989234
								0.863	82.4	0.0824	0.863	1	0.981828		65	0.065	0.863	0	0.98827		0.0064416				0.869	0.988586	0.982894		0.983019	0.989277
								0.864	82.4	0.0824	0.864	0	0.981828		65.1	0.0651	0.864	0	0.98827		0.0064416				0.87	0.988626	0.982948		0.983074	0.989319
								0.865	82.5	0.0825	0.865	0	0.981828		65.2	0.0652	0.865	0	0.98827		0.0064416				0.871	0.988666	0.983002		0.98313	0.989362
								0.866	82.6	0.0826	0.866	0	0.981828		65.3	0.0653	0.866	0	0.98827		0.0064416				0.872	0.988706	0.983056		0.983185	0.989404
								0.867	82.7	0.0827	0.867	0	0.981828		65.3	0.0653	0.867	0	0.98827		0.0064416				0.873	0.988746	0.983109		0.98324	0.989446
								0.868	82.7	0.0827	0.868	0	0.981828		65.4	0.0654	0.868	0	0.98827		0.0064416				0.874	0.988786	0.983162		0.983295	0.989488
								0.869	82.9	0.0829	0.869	0	0.981828		65.4	0.0654	0.869	0	0.98827		0.0064416				0.875	0.988825	0.983215		0.983349	0.98953
								0.87	83	0.083	0.87	0	0.981828		65.4	0.0654	0.87	0	0.98827		0.0064416				0.876	0.988865	0.983268		0.983404	0.989572
								0.871	83	0.083	0.871	0	0.981828		65.5	0.0655	0.871	0	0.98827		0.0064416				0.877	0.988904	0.983321		0.983458	0.989613
								0.872	83.1	0.0831	0.872	0	0.981828		65.5	0.0655	0.872	0	0.98827		0.0064416				0.878	0.988943	0.983373		0.983512	0.989655
								0.873	83.1	0.0831	0.873	0	0.981828		65.6	0.0656	0.873	0	0.98827		0.0064416				0.879	0.988982	0.983426		0.983566	0.989696
								0.874	83.2	0.0832	0.874	0	0.981828		65.6	0.0656	0.874	0	0.98827		0.0064416				0.88	0.989021	0.983478		0.983619	0.989737
								0.875	83.3	0.0833	0.875	0	0.981828		65.7	0.0657	0.875	0	0.98827		0.0064416				0.881	0.989059	0.98353		0.983673	0.989778
								0.876	83.7	0.0837	0.876	0	0.981828		65.7	0.0657	0.876	0	0.98827		0.0064416				0.882	0.989098	0.983582		0.983726	0.989819
								0.877	83.9	0.0839	0.877	0	0.981828		65.9	0.0659	0.877	1	0.988759		0.00693036				0.883	0.989136	0.983633		0.983779	0.989859
								0.878	83.9	0.0839	0.878	0	0.981828		66.2	0.0662	0.878	0	0.988759		0.00693036				0.884	0.989174	0.983685		0.983832	0.9899
								0.879	84.2	0.0842	0.879	0	0.981828		66.2	0.0662	0.879	0	0.988759		0.00693036				0.885	0.989212	0.983736		0.983885	0.98994
								0.88	84.2	0.0842	0.88	0	0.981828		66.3	0.0663	0.88	0	0.988759		0.00693036				0.886	0.98925	0.983787		0.983938	0.98998
								0.881	84.4	0.0844	0.881	0	0.981828		66.4	0.0664	0.881	0	0.988759		0.00693036				0.887	0.989287	0.983838		0.98399	0.99002
								0.882	84.5	0.0845	0.882	0	0.981828		66.6	0.0666	0.882	0	0.988759		0.00693036				0.888	0.989325	0.983889		0.984042	0.99006
								0.883	84.8	0.0848	0.883	0	0.981828		66.6	0.0666	0.883	0	0.988759		0.00693036				0.889	0.989362	0.983939		0.984094	0.990099
								0.884	84.9	0.0849	0.884	0	0.981828		66.9	0.0669	0.884	0	0.988759		0.00693036				0.89	0.989399	0.98399		0.984146	0.990139
								0.885	84.9	0.0849	0.885	0	0.981828		66.9	0.0669	0.885	0	0.988759		0.00693036				0.891	0.989436	0.98404		0.984198	0.990178
								0.886	85.3	0.0853	0.886	0	0.981828		66.9	0.0669	0.886	0	0.988759		0.00693036				0.892	0.989473	0.98409		0.984249	0.990217
								0.887	85.3	0.0853	0.887	0	0.981828		66.9	0.0669	0.887	0	0.988759		0.00693036				0.893	0.98951	0.98414		0.984301	0.990256
								0.888	85.4	0.0854	0.888	0	0.981828		67	0.067	0.888	0	0.988759		0.00693036				0.894	0.989547	0.98419		0.984352	0.990295
								0.889	86	0.086	0.889	0	0.981828		67	0.067	0.889	0	0.988759		0.00693036				0.895	0.989583	0.984239		0.984403	0.990333
								0.89	86	0.086	0.89	0	0.981828		67	0.067	0.89	0	0.988759		0.00693036				0.896	0.989619	0.984289		0.984454	0.990372
								0.891	86	0.086	0.891	0	0.981828		67.3	0.0673	0.891	0	0.988759		0.00693036				0.897	0.989656	0.984338		0.984505	0.99041
								0.892	86.1	0.0861	0.892	0	0.981828		67.3	0.0673	0.892	0	0.988759		0.00693036				0.898	0.989692	0.984387		0.984555	0.990448
								0.893	86.1	0.0861	0.893	0	0.981828		67.3	0.0673	0.893	0	0.988759		0.00693036				0.899	0.989728	0.984436		0.984606	0.990486
								0.894	86.2	0.0862	0.894	0	0.981828		67.4	0.0674	0.894	1	0.989247		0.00741912				0.9	0.989763	0.984485		0.984656	0.990524
								0.895	86.4	0.0864	0.895	0	0.981828		67.4	0.0674	0.895	0	0.989247		0.00741912				0.901	0.989799	0.984534		0.984706	0.990562
								0.896	86.8	0.0868	0.896	0	0.981828		67.5	0.0675	0.896	1	0.989736		0.00790788				0.902	0.989834	0.984582		0.984756	0.9906
								0.897	87.1	0.0871	0.897	0	0.981828		67.5	0.0675	0.897	0	0.989736		0.00790788				0.903	0.98987	0.98463		0.984805	0.990637
								0.898	87.2	0.0872	0.898	0	0.981828		67.5	0.0675	0.898	0	0.989736		0.00790788				0.904	0.989905	0.984678		0.984855	0.990674
								0.899	87.2	0.0872	0.899	0	0.981828		67.8	0.0678	0.899	0	0.989736		0.00790788				0.905	0.98994	0.984726		0.984904	0.990711
								0.9	87.6	0.0876	0.9	0	0.981828		67.8	0.0678	0.9	0	0.989736		0.00790788				0.906	0.989975	0.984774		0.984954	0.990748
								0.901	88	0.088	0.901	0	0.981828		67.9	0.0679	0.901	0	0.989736		0.00790788				0.907	0.990009	0.984822		0.985003	0.990785
								0.902	88	0.088	0.902	0	0.981828		68	0.068	0.902	0	0.989736		0.00790788				0.908	0.990044	0.984869		0.985052	0.990822
								0.903	88.1	0.0881	0.903	0	0.981828		68.1	0.0681	0.903	0	0.989736		0.00790788				0.909	0.990078	0.984917		0.9851	0.990858
								0.904	88.5	0.0885	0.904	0	0.981828		68.1	0.0681	0.904	0	0.989736		0.00790788				0.91	0.990113	0.984964		0.985149	0.990895
								0.905	88.9	0.0889	0.905	0	0.981828		68.4	0.0684	0.905	0	0.989736		0.00790788				0.911	0.990147	0.985011		0.985197	0.990931
								0.906	89	0.089	0.906	0	0.981828		68.9	0.0689	0.906	0	0.989736		0.00790788				0.912	0.990181	0.985058		0.985245	0.990967
								0.907	89.2	0.0892	0.907	0	0.981828		68.9	0.0689	0.907	0	0.989736		0.00790788				0.913	0.990215	0.985104		0.985294	0.991003
								0.908	89.6	0.0896	0.908	0	0.981828		69	0.069	0.908	0	0.989736		0.00790788				0.914	0.990249	0.985151		0.985341	0.991039
								0.909	89.7	0.0897	0.909	0	0.981828		69.1	0.0691	0.909	0	0.989736		0.00790788				0.915	0.990282	0.985197		0.985389	0.991075
								0.91	89.8	0.0898	0.91	0	0.981828		69.2	0.0692	0.91	0	0.989736		0.00790788				0.916	0.990316	0.985243		0.985437	0.99111
								0.911	89.8	0.0898	0.911	0	0.981828		69.2	0.0692	0.911	0	0.989736		0.00790788				0.917	0.990349	0.98529		0.985484	0.991146
								0.912	90.2	0.0902	0.912	0	0.981828		69.6	0.0696	0.912	0	0.989736		0.00790788				0.918	0.990382	0.985335		0.985532	0.991181
								0.913	90.3	0.0903	0.913	0	0.981828		69.8	0.0698	0.913	0	0.989736		0.00790788				0.919	0.990415	0.985381		0.985579	0.991216
								0.914	90.4	0.0904	0.914	0	0.981828		69.9	0.0699	0.914	0	0.989736		0.00790788				0.92	0.990448	0.985427		0.985626	0.991251
								0.915	90.4	0.0904	0.915	0	0.981828		69.9	0.0699	0.915	0	0.989736		0.00790788				0.921	0.990481	0.985472		0.985673	0.991286
								0.916	90.8	0.0908	0.916	0	0.981828		70	0.07	0.916	0	0.989736		0.00790788				0.922	0.990514	0.985518		0.985719	0.99132
								0.917	91.1	0.0911	0.917	0	0.981828		70	0.07	0.917	0	0.989736		0.00790788				0.923	0.990546	0.985563		0.985766	0.991355
								0.918	91.3	0.0913	0.918	0	0.981828		70.1	0.0701	0.918	0	0.989736		0.00790788				0.924	0.990579	0.985608		0.985812	0.991389
								0.919	91.5	0.0915	0.919	0	0.981828		70.2	0.0702	0.919	0	0.989736		0.00790788				0.925	0.990611	0.985653		0.985858	0.991424
								0.92	91.7	0.0917	0.92	0	0.981828		70.4	0.0704	0.92	0	0.989736		0.00790788				0.926	0.990643	0.985697		0.985904	0.991458
								0.921	91.8	0.0918	0.921	1	0.982379		70.5	0.0705	0.921	0	0.989736		0.00735722				0.927	0.990675	0.985742		0.98595	0.991492
								0.922	91.9	0.0919	0.922	0	0.982379		70.7	0.0707	0.922	0	0.989736		0.00735722				0.928	0.990707	0.985786		0.985996	0.991526
								0.923	92.1	0.0921	0.923	0	0.982379		70.7	0.0707	0.923	0	0.989736		0.00735722				0.929	0.990739	0.985831		0.986042	0.991559
								0.924	92.2	0.0922	0.924	0	0.982379		70.7	0.0707	0.924	0	0.989736		0.00735722				0.93	0.990771	0.985875		0.986087	0.991593
								0.925	92.3	0.0923	0.925	0	0.982379		70.7	0.0707	0.925	0	0.989736		0.00735722				0.931	0.990802	0.985919		0.986132	0.991627
								0.926	92.5	0.0925	0.926	0	0.982379		70.8	0.0708	0.926	1	0.990225		0.00784597				0.932	0.990833	0.985963		0.986178	0.99166
								0.927	92.6	0.0926	0.927	0	0.982379		70.8	0.0708	0.927	0	0.990225		0.00784597				0.933	0.990865	0.986006		0.986223	0.991693
								0.928	92.9	0.0929	0.928	0	0.982379		70.9	0.0709	0.928	0	0.990225		0.00784597				0.934	0.990896	0.98605		0.986267	0.991726
								0.929	92.9	0.0929	0.929	0	0.982379		70.9	0.0709	0.929	1	0.990714		0.00833473				0.935	0.990927	0.986093		0.986312	0.991759
								0.93	93.1	0.0931	0.93	0	0.982379		71.2	0.0712	0.93	0	0.990714		0.00833473				0.936	0.990958	0.986136		0.986357	0.991792
								0.931	93.3	0.0933	0.931	0	0.982379		71.2	0.0712	0.931	0	0.990714		0.00833473				0.937	0.990989	0.98618		0.986401	0.991825
								0.932	93.4	0.0934	0.932	0	0.982379		71.2	0.0712	0.932	0	0.990714		0.00833473				0.938	0.991019	0.986222		0.986445	0.991857
								0.933	93.7	0.0937	0.933	0	0.982379		71.3	0.0713	0.933	0	0.990714		0.00833473				0.939	0.99105	0.986265		0.986489	0.99189
								0.934	93.7	0.0937	0.934	0	0.982379		71.3	0.0713	0.934	0	0.990714		0.00833473				0.94	0.99108	0.986308		0.986533	0.991922
								0.935	93.7	0.0937	0.935	0	0.982379		71.4	0.0714	0.935	0	0.990714		0.00833473				0.941	0.99111	0.986351		0.986577	0.991954
								0.936	93.7	0.0937	0.936	0	0.982379		71.4	0.0714	0.936	0	0.990714		0.00833473				0.942	0.991141	0.986393		0.986621	0.991986
								0.937	93.8	0.0938	0.937	0	0.982379		71.5	0.0715	0.937	0	0.990714		0.00833473				0.943	0.991171	0.986435		0.986664	0.992018
								0.938	93.9	0.0939	0.938	0	0.982379		71.5	0.0715	0.938	0	0.990714		0.00833473				0.944	0.991201	0.986477		0.986708	0.99205
								0.939	94	0.094	0.939	0	0.982379		71.5	0.0715	0.939	0	0.990714		0.00833473				0.945	0.99123	0.986519		0.986751	0.992081
								0.94	94.2	0.0942	0.94	0	0.982379		72.1	0.0721	0.94	0	0.990714		0.00833473				0.946	0.99126	0.986561		0.986794	0.992113
								0.941	94.5	0.0945	0.941	1	0.98293		72.2	0.0722	0.941	0	0.990714		0.00778407				0.947	0.99129	0.986603		0.986837	0.992144
								0.942	94.9	0.0949	0.942	0	0.98293		72.2	0.0722	0.942	0	0.990714		0.00778407				0.948	0.991319	0.986644		0.98688	0.992176
								0.943	95.1	0.0951	0.943	0	0.98293		72.2	0.0722	0.943	0	0.990714		0.00778407				0.949	0.991348	0.986686		0.986923	0.992207
								0.944	95.3	0.0953	0.944	0	0.98293		72.6	0.0726	0.944	1	0.991202		0.00827283				0.95	0.991377	0.986727		0.986965	0.992238
								0.945	96.2	0.0962	0.945	0	0.98293		72.8	0.0728	0.945	0	0.991202		0.00827283				0.951	0.991407	0.986768		0.987008	0.992269
								0.946	96.3	0.0963	0.946	0	0.98293		72.8	0.0728	0.946	0	0.991202		0.00827283				0.952	0.991436	0.986809		0.98705	0.992299
								0.947	96.4	0.0964	0.947	0	0.98293		72.9	0.0729	0.947	0	0.991202		0.00827283				0.953	0.991464	0.98685		0.987092	0.99233
								0.948	96.6	0.0966	0.948	0	0.98293		73	0.073	0.948	0	0.991202		0.00827283				0.954	0.991493	0.986891		0.987134	0.992361
								0.949	96.7	0.0967	0.949	0	0.98293		73	0.073	0.949	0	0.991202		0.00827283				0.955	0.991522	0.986931		0.987176	0.992391
								0.95	97.1	0.0971	0.95	0	0.98293		73.1	0.0731	0.95	0	0.991202		0.00827283				0.956	0.99155	0.986972		0.987218	0.992421
								0.951	97.4	0.0974	0.951	0	0.98293		73.1	0.0731	0.951	0	0.991202		0.00827283				0.957	0.991579	0.987012		0.987259	0.992451
								0.952	97.4	0.0974	0.952	1	0.98348		73.2	0.0732	0.952	0	0.991202		0.00772217				0.958	0.991607	0.987052		0.987301	0.992481
								0.953	97.5	0.0975	0.953	0	0.98348		73.2	0.0732	0.953	0	0.991202		0.00772217				0.959	0.991635	0.987093		0.987342	0.992511
								0.954	98.2	0.0982	0.954	0	0.98348		73.3	0.0733	0.954	0	0.991202		0.00772217				0.96	0.991663	0.987132		0.987383	0.992541
								0.955	98.3	0.0983	0.955	0	0.98348		73.5	0.0735	0.955	0	0.991202		0.00772217				0.961	0.991691	0.987172		0.987424	0.992571
								0.956	98.3	0.0983	0.956	0	0.98348		73.5	0.0735	0.956	0	0.991202		0.00772217				0.962	0.991719	0.987212		0.987465	0.9926
								0.957	98.7	0.0987	0.957	0	0.98348		73.6	0.0736	0.957	0	0.991202		0.00772217				0.963	0.991747	0.987252		0.987506	0.99263
								0.958	98.7	0.0987	0.958	0	0.98348		73.8	0.0738	0.958	0	0.991202		0.00772217				0.964	0.991774	0.987291		0.987546	0.992659
								0.959	98.8	0.0988	0.959	0	0.98348		73.9	0.0739	0.959	0	0.991202		0.00772217				0.965	0.991802	0.98733		0.987587	0.992688
								0.96	98.8	0.0988	0.96	0	0.98348		73.9	0.0739	0.96	0	0.991202		0.00772217				0.966	0.991829	0.987369		0.987627	0.992718
								0.961	98.9	0.0989	0.961	1	0.984031		74	0.074	0.961	0	0.991202		0.00717151				0.967	0.991856	0.987408		0.987667	0.992747
								0.962	99	0.099	0.962	0	0.984031		74.2	0.0742	0.962	0	0.991202		0.00717151				0.968	0.991883	0.987447		0.987707	0.992775
								0.963	99.2	0.0992	0.963	0	0.984031		74.3	0.0743	0.963	0	0.991202		0.00717151				0.969	0.99191	0.987486		0.987747	0.992804
								0.964	99.4	0.0994	0.964	0	0.984031		74.3	0.0743	0.964	0	0.991202		0.00717151				0.97	0.991937	0.987525		0.987787	0.992833
								0.965	99.4	0.0994	0.965	0	0.984031		74.4	0.0744	0.965	0	0.991202		0.00717151				0.971	0.991964	0.987563		0.987827	0.992861
								0.966	99.5	0.0995	0.966	0	0.984031		74.5	0.0745	0.966	0	0.991202		0.00717151				0.972	0.991991	0.987602		0.987866	0.99289
								0.967	100	0.1	0.967	0	0.984031		74.5	0.0745	0.967	0	0.991202		0.00717151				0.973	0.992018	0.98764		0.987906	0.992918
								0.968	100.7	0.1007	0.968	0	0.984031		74.5	0.0745	0.968	0	0.991202		0.00717151				0.974	0.992044	0.987678		0.987945	0.992946
								0.969	101.3	0.1013	0.969	0	0.984031		74.5	0.0745	0.969	0	0.991202		0.00717151				0.975	0.99207	0.987716		0.987984	0.992974
								0.97	101.5	0.1015	0.97	0	0.984031		74.7	0.0747	0.97	0	0.991202		0.00717151				0.976	0.992097	0.987754		0.988023	0.993002
								0.971	101.7	0.1017	0.971	0	0.984031		74.8	0.0748	0.971	0	0.991202		0.00717151				0.977	0.992123	0.987792		0.988062	0.99303
								0.972	102	0.102	0.972	0	0.984031		74.9	0.0749	0.972	0	0.991202		0.00717151				0.978	0.992149	0.987829		0.988101	0.993058
								0.973	102.3	0.1023	0.973	0	0.984031		75	0.075	0.973	1	0.991691		0.00766027				0.979	0.992175	0.987867		0.98814	0.993086
								0.974	102.7	0.1027	0.974	0	0.984031		75.2	0.0752	0.974	0	0.991691		0.00766027				0.98	0.992201	0.987904		0.988178	0.993113
								0.975	102.8	0.1028	0.975	0	0.984031		75.2	0.0752	0.975	0	0.991691		0.00766027				0.981	0.992227	0.987941		0.988217	0.99314
								0.976	102.8	0.1028	0.976	1	0.984581		75.4	0.0754	0.976	0	0.991691		0.00710961				0.982	0.992252	0.987979		0.988255	0.993168
								0.977	103.1	0.1031	0.977	0	0.984581		75.7	0.0757	0.977	0	0.991691		0.00710961				0.983	0.992278	0.988016		0.988293	0.993195
								0.978	103.1	0.1031	0.978	0	0.984581		75.9	0.0759	0.978	0	0.991691		0.00710961				0.984	0.992303	0.988052		0.988331	0.993222
								0.979	103.2	0.1032	0.979	0	0.984581		76	0.076	0.979	0	0.991691		0.00710961				0.985	0.992329	0.988089		0.988369	0.993249
								0.98	103.3	0.1033	0.98	0	0.984581		76.1	0.0761	0.98	0	0.991691		0.00710961				0.986	0.992354	0.988126		0.988407	0.993276
								0.981	103.3	0.1033	0.981	0	0.984581		76.2	0.0762	0.981	0	0.991691		0.00710961				0.987	0.992379	0.988162		0.988445	0.993303
								0.982	103.5	0.1035	0.982	0	0.984581		76.3	0.0763	0.982	0	0.991691		0.00710961				0.988	0.992404	0.988199		0.988482	0.993329
								0.983	103.7	0.1037	0.983	0	0.984581		76.3	0.0763	0.983	1	0.99218		0.00759837				0.989	0.992429	0.988235		0.98852	0.993356
								0.984	103.8	0.1038	0.984	0	0.984581		76.5	0.0765	0.984	1	0.992669		0.00808712				0.99	0.992454	0.988271		0.988557	0.993382
								0.985	103.8	0.1038	0.985	0	0.984581		76.6	0.0766	0.985	0	0.992669		0.00808712				0.991	0.992479	0.988307		0.988594	0.993409
								0.986	103.8	0.1038	0.986	0	0.984581		76.8	0.0768	0.986	0	0.992669		0.00808712				0.992	0.992503	0.988343		0.988631	0.993435
								0.987	103.8	0.1038	0.987	0	0.984581		77	0.077	0.987	0	0.992669		0.00808712				0.993	0.992528	0.988379		0.988668	0.993461
								0.988	103.9	0.1039	0.988	0	0.984581		77	0.077	0.988	0	0.992669		0.00808712				0.994	0.992552	0.988415		0.988705	0.993487
								0.989	104.5	0.1045	0.989	0	0.984581		77.2	0.0772	0.989	0	0.992669		0.00808712				0.995	0.992577	0.98845		0.988742	0.993513
								0.99	104.9	0.1049	0.99	0	0.984581		77.3	0.0773	0.99	0	0.992669		0.00808712				0.996	0.992601	0.988486		0.988778	0.993539
								0.991	105.2	0.1052	0.991	0	0.984581		77.3	0.0773	0.991	0	0.992669		0.00808712				0.997	0.992625	0.988521		0.988815	0.993564
								0.992	105.2	0.1052	0.992	0	0.984581		77.6	0.0776	0.992	0	0.992669		0.00808712				0.998	0.992649	0.988556		0.988851	0.99359
								0.993	105.3	0.1053	0.993	0	0.984581		77.6	0.0776	0.993	0	0.992669		0.00808712				0.999	0.992673	0.988591		0.988887	0.993616
								0.994	105.3	0.1053	0.994	0	0.984581		77.7	0.0777	0.994	0	0.992669		0.00808712				1	0.992697	0.988626		0.988923	0.993641
								0.995	105.8	0.1058	0.995	0	0.984581		77.8	0.0778	0.995	0	0.992669		0.00808712				1.001	0.992721	0.988661		0.988959	0.993666
								0.996	105.9	0.1059	0.996	0	0.984581		77.8	0.0778	0.996	0	0.992669		0.00808712				1.002	0.992744	0.988696		0.988995	0.993692
								0.997	106.1	0.1061	0.997	0	0.984581		77.9	0.0779	0.997	0	0.992669		0.00808712				1.003	0.992768	0.988731		0.989031	0.993717
								0.998	106.1	0.1061	0.998	0	0.984581		78	0.078	0.998	1	0.993157		0.00857588				1.004	0.992791	0.988765		0.989066	0.993742
								0.999	106.2	0.1062	0.999	0	0.984581		78.1	0.0781	0.999	0	0.993157		0.00857588				1.005	0.992815	0.9888		0.989102	0.993767
								1	106.3	0.1063	1	1	0.985132		78.2	0.0782	1	0	0.993157		0.00802522				1.006	0.992838	0.988834		0.989137	0.993791
								1.001	107	0.107	1.001	0	0.985132		78.4	0.0784	1.001	0	0.993157		0.00802522				1.007	0.992861	0.988868		0.989172	0.993816
								1.002	107.2	0.1072	1.002	1	0.985683		78.5	0.0785	1.002	0	0.993157		0.00747456				1.008	0.992885	0.988902		0.989208	0.993841
								1.003	107.3	0.1073	1.003	0	0.985683		78.5	0.0785	1.003	0	0.993157		0.00747456				1.009	0.992908	0.988936		0.989243	0.993865
								1.004	107.4	0.1074	1.004	0	0.985683		78.7	0.0787	1.004	0	0.993157		0.00747456				1.01	0.99293	0.98897		0.989278	0.99389
								1.005	107.6	0.1076	1.005	0	0.985683		78.7	0.0787	1.005	0	0.993157		0.00747456				1.011	0.992953	0.989004		0.989312	0.993914
								1.006	107.6	0.1076	1.006	0	0.985683		78.7	0.0787	1.006	0	0.993157		0.00747456				1.012	0.992976	0.989038		0.989347	0.993938
								1.007	108	0.108	1.007	0	0.985683		78.8	0.0788	1.007	0	0.993157		0.00747456				1.013	0.992999	0.989071		0.989382	0.993962
								1.008	108.5	0.1085	1.008	0	0.985683		78.9	0.0789	1.008	0	0.993157		0.00747456				1.014	0.993021	0.989105		0.989416	0.993986
								1.009	108.9	0.1089	1.009	0	0.985683		78.9	0.0789	1.009	0	0.993157		0.00747456				1.015	0.993044	0.989138		0.98945	0.99401
								1.01	109	0.109	1.01	0	0.985683		79.2	0.0792	1.01	0	0.993157		0.00747456				1.016	0.993066	0.989171		0.989485	0.994034
								1.011	109.2	0.1092	1.011	0	0.985683		79.3	0.0793	1.011	0	0.993157		0.00747456				1.017	0.993088	0.989204		0.989519	0.994058
								1.012	109.2	0.1092	1.012	0	0.985683		79.4	0.0794	1.012	0	0.993157		0.00747456				1.018	0.993111	0.989237		0.989553	0.994081
								1.013	109.8	0.1098	1.013	0	0.985683		79.5	0.0795	1.013	0	0.993157		0.00747456				1.019	0.993133	0.98927		0.989587	0.994105
								1.014	110	0.11	1.014	0	0.985683		79.7	0.0797	1.014	0	0.993157		0.00747456				1.02	0.993155	0.989303		0.989621	0.994128
								1.015	110	0.11	1.015	0	0.985683		79.7	0.0797	1.015	0	0.993157		0.00747456				1.021	0.993177	0.989335		0.989654	0.994152
								1.016	110.3	0.1103	1.016	0	0.985683		79.9	0.0799	1.016	0	0.993157		0.00747456				1.022	0.993198	0.989368		0.989688	0.994175
								1.017	110.4	0.1104	1.017	0	0.985683		79.9	0.0799	1.017	1	0.993646		0.00796332				1.023	0.99322	0.9894		0.989721	0.994198
								1.018	110.5	0.1105	1.018	0	0.985683		79.9	0.0799	1.018	0	0.993646		0.00796332				1.024	0.993242	0.989433		0.989755	0.994221
								1.019	110.5	0.1105	1.019	0	0.985683		80	0.08	1.019	0	0.993646		0.00796332				1.025	0.993263	0.989465		0.989788	0.994244
								1.02	110.6	0.1106	1.02	0	0.985683		80	0.08	1.02	0	0.993646		0.00796332				1.026	0.993285	0.989497		0.989821	0.994267
								1.021	110.9	0.1109	1.021	0	0.985683		80.1	0.0801	1.021	0	0.993646		0.00796332				1.027	0.993306	0.989529		0.989854	0.99429
								1.022	110.9	0.1109	1.022	0	0.985683		80.2	0.0802	1.022	0	0.993646		0.00796332				1.028	0.993328	0.989561		0.989887	0.994313
								1.023	111	0.111	1.023	0	0.985683		80.3	0.0803	1.023	0	0.993646		0.00796332				1.029	0.993349	0.989593		0.98992	0.994335
								1.024	111.1	0.1111	1.024	0	0.985683		80.8	0.0808	1.024	0	0.993646		0.00796332				1.03	0.99337	0.989625		0.989953	0.994358
								1.025	111.1	0.1111	1.025	0	0.985683		81	0.081	1.025	0	0.993646		0.00796332				1.031	0.993391	0.989656		0.989985	0.99438
								1.026	111.4	0.1114	1.026	0	0.985683		81.1	0.0811	1.026	1	0.994135		0.00845208				1.032	0.993412	0.989688		0.990018	0.994403
								1.027	111.6	0.1116	1.027	1	0.986233		81.3	0.0813	1.027	0	0.994135		0.00790142				1.033	0.993433	0.989719		0.99005	0.994425
								1.028	111.7	0.1117	1.028	0	0.986233		81.3	0.0813	1.028	0	0.994135		0.00790142				1.034	0.993454	0.98975		0.990082	0.994447
								1.029	111.7	0.1117	1.029	1	0.986784		81.4	0.0814	1.029	0	0.994135		0.00735076				1.035	0.993475	0.989782		0.990114	0.994469
								1.03	111.7	0.1117	1.03	0	0.986784		81.5	0.0815	1.03	0	0.994135		0.00735076				1.036	0.993495	0.989813		0.990147	0.994491
								1.031	111.7	0.1117	1.031	0	0.986784		81.5	0.0815	1.031	0	0.994135		0.00735076				1.037	0.993516	0.989844		0.990179	0.994513
								1.032	111.7	0.1117	1.032	1	0.987335		81.5	0.0815	1.032	0	0.994135		0.0068001				1.038	0.993536	0.989875		0.99021	0.994535
								1.033	111.9	0.1119	1.033	0	0.987335		81.6	0.0816	1.033	0	0.994135		0.0068001				1.039	0.993557	0.989905		0.990242	0.994557
								1.034	111.9	0.1119	1.034	0	0.987335		81.7	0.0817	1.034	0	0.994135		0.0068001				1.04	0.993577	0.989936		0.990274	0.994579
								1.035	112.1	0.1121	1.035	0	0.987335		81.7	0.0817	1.035	0	0.994135		0.0068001				1.041	0.993597	0.989967		0.990305	0.9946
								1.036	112.4	0.1124	1.036	0	0.987335		81.9	0.0819	1.036	0	0.994135		0.0068001				1.042	0.993617	0.989997		0.990337	0.994622
								1.037	112.9	0.1129	1.037	1	0.987885		81.9	0.0819	1.037	0	0.994135		0.00624943				1.043	0.993637	0.990027		0.990368	0.994643
								1.038	113.2	0.1132	1.038	0	0.987885		81.9	0.0819	1.038	0	0.994135		0.00624943				1.044	0.993657	0.990058		0.990399	0.994664
								1.039	113.3	0.1133	1.039	0	0.987885		82	0.082	1.039	0	0.994135		0.00624943				1.045	0.993677	0.990088		0.990431	0.994686
								1.04	113.4	0.1134	1.04	0	0.987885		82.2	0.0822	1.04	0	0.994135		0.00624943				1.046	0.993697	0.990118		0.990462	0.994707
								1.041	113.4	0.1134	1.041	0	0.987885		82.3	0.0823	1.041	0	0.994135		0.00624943				1.047	0.993717	0.990148		0.990493	0.994728
								1.042	113.6	0.1136	1.042	0	0.987885		82.3	0.0823	1.042	0	0.994135		0.00624943				1.048	0.993737	0.990178		0.990523	0.994749
								1.043	113.8	0.1138	1.043	0	0.987885		82.4	0.0824	1.043	0	0.994135		0.00624943				1.049	0.993756	0.990208		0.990554	0.99477
								1.044	113.8	0.1138	1.044	0	0.987885		82.5	0.0825	1.044	0	0.994135		0.00624943				1.05	0.993776	0.990237		0.990585	0.99479
								1.045	114.5	0.1145	1.045	0	0.987885		82.5	0.0825	1.045	0	0.994135		0.00624943				1.051	0.993795	0.990267		0.990615	0.994811
								1.046	115	0.115	1.046	1	0.988436		83	0.083	1.046	0	0.994135		0.00569877				1.052	0.993815	0.990296		0.990646	0.994832
								1.047	115.1	0.1151	1.047	0	0.988436		83	0.083	1.047	1	0.994624		0.00618753				1.053	0.993834	0.990326		0.990676	0.994852
								1.048	115.8	0.1158	1.048	0	0.988436		83	0.083	1.048	0	0.994624		0.00618753				1.054	0.993853	0.990355		0.990706	0.994873
								1.049	116	0.116	1.049	0	0.988436		83.1	0.0831	1.049	0	0.994624		0.00618753				1.055	0.993872	0.990384		0.990736	0.994893
								1.05	116.4	0.1164	1.05	0	0.988436		83.1	0.0831	1.05	0	0.994624		0.00618753				1.056	0.993891	0.990414		0.990766	0.994914
								1.051	116.7	0.1167	1.051	0	0.988436		83.1	0.0831	1.051	0	0.994624		0.00618753				1.057	0.99391	0.990443		0.990796	0.994934
								1.052	116.9	0.1169	1.052	0	0.988436		83.1	0.0831	1.052	0	0.994624		0.00618753				1.058	0.993929	0.990471		0.990826	0.994954
								1.053	117.3	0.1173	1.053	0	0.988436		83.2	0.0832	1.053	0	0.994624		0.00618753				1.059	0.993948	0.9905		0.990856	0.994974
								1.054	117.7	0.1177	1.054	0	0.988436		83.2	0.0832	1.054	0	0.994624		0.00618753				1.06	0.993967	0.990529		0.990886	0.994994
								1.055	118.3	0.1183	1.055	0	0.988436		83.3	0.0833	1.055	0	0.994624		0.00618753				1.061	0.993985	0.990558		0.990915	0.995014
								1.056	118.4	0.1184	1.056	0	0.988436		83.4	0.0834	1.056	0	0.994624		0.00618753				1.062	0.994004	0.990586		0.990945	0.995034
								1.057	118.5	0.1185	1.057	0	0.988436		83.6	0.0836	1.057	0	0.994624		0.00618753				1.063	0.994022	0.990615		0.990974	0.995054
								1.058	118.9	0.1189	1.058	0	0.988436		83.7	0.0837	1.058	0	0.994624		0.00618753				1.064	0.994041	0.990643		0.991003	0.995073
								1.059	119	0.119	1.059	0	0.988436		83.8	0.0838	1.059	0	0.994624		0.00618753				1.065	0.994059	0.990671		0.991032	0.995093
								1.06	119.1	0.1191	1.06	0	0.988436		83.8	0.0838	1.06	0	0.994624		0.00618753				1.066	0.994078	0.990699		0.991062	0.995112
								1.061	119.1	0.1191	1.061	0	0.988436		83.9	0.0839	1.061	0	0.994624		0.00618753				1.067	0.994096	0.990728		0.991091	0.995132
								1.062	119.5	0.1195	1.062	0	0.988436		84	0.084	1.062	0	0.994624		0.00618753				1.068	0.994114	0.990756		0.991119	0.995151
								1.063	119.7	0.1197	1.063	1	0.988987		84	0.084	1.063	0	0.994624		0.00563687				1.069	0.994132	0.990783		0.991148	0.995171
								1.064	119.7	0.1197	1.064	1	0.989537		84	0.084	1.064	0	0.994624		0.00508621				1.07	0.99415	0.990811		0.991177	0.99519
								1.065	119.7	0.1197	1.065	0	0.989537		84	0.084	1.065	0	0.994624		0.00508621				1.071	0.994168	0.990839		0.991206	0.995209
								1.066	119.9	0.1199	1.066	0	0.989537		84.1	0.0841	1.066	1	0.995112		0.00557497				1.072	0.994186	0.990867		0.991234	0.995228
								1.067	120	0.12	1.067	0	0.989537		84.2	0.0842	1.067	0	0.995112		0.00557497				1.073	0.994204	0.990894		0.991262	0.995247
								1.068	120	0.12	1.068	0	0.989537		84.4	0.0844	1.068	0	0.995112		0.00557497				1.074	0.994221	0.990922		0.991291	0.995266
								1.069	120.1	0.1201	1.069	0	0.989537		84.5	0.0845	1.069	0	0.995112		0.00557497				1.075	0.994239	0.990949		0.991319	0.995285
								1.07	120.1	0.1201	1.07	0	0.989537		84.6	0.0846	1.07	0	0.995112		0.00557497				1.076	0.994257	0.990976		0.991347	0.995304
								1.071	120.4	0.1204	1.071	0	0.989537		84.7	0.0847	1.071	0	0.995112		0.00557497				1.077	0.994274	0.991003		0.991375	0.995322
								1.072	120.8	0.1208	1.072	1	0.990088		84.7	0.0847	1.072	0	0.995112		0.00502431				1.078	0.994291	0.99103		0.991403	0.995341
								1.073	120.8	0.1208	1.073	0	0.990088		84.7	0.0847	1.073	0	0.995112		0.00502431				1.079	0.994309	0.991057		0.991431	0.995359
								1.074	120.9	0.1209	1.074	0	0.990088		84.7	0.0847	1.074	0	0.995112		0.00502431				1.08	0.994326	0.991084		0.991459	0.995378
								1.075	120.9	0.1209	1.075	0	0.990088		84.8	0.0848	1.075	0	0.995112		0.00502431				1.081	0.994343	0.991111		0.991487	0.995396
								1.076	121.4	0.1214	1.076	0	0.990088		85.1	0.0851	1.076	0	0.995112		0.00502431				1.082	0.994361	0.991138		0.991514	0.995415
								1.077	121.4	0.1214	1.077	0	0.990088		85.2	0.0852	1.077	0	0.995112		0.00502431				1.083	0.994378	0.991165		0.991542	0.995433
								1.078	121.5	0.1215	1.078	0	0.990088		85.4	0.0854	1.078	0	0.995112		0.00502431				1.084	0.994395	0.991191		0.991569	0.995451
								1.079	121.6	0.1216	1.079	0	0.990088		85.5	0.0855	1.079	0	0.995112		0.00502431				1.085	0.994412	0.991218		0.991596	0.995469
								1.08	121.8	0.1218	1.08	0	0.990088		85.6	0.0856	1.08	0	0.995112		0.00502431				1.086	0.994428	0.991244		0.991624	0.995487
								1.081	122.1	0.1221	1.081	0	0.990088		85.6	0.0856	1.081	0	0.995112		0.00502431				1.087	0.994445	0.99127		0.991651	0.995505
								1.082	122.3	0.1223	1.082	0	0.990088		85.7	0.0857	1.082	0	0.995112		0.00502431				1.088	0.994462	0.991297		0.991678	0.995523
								1.083	122.3	0.1223	1.083	0	0.990088		85.8	0.0858	1.083	0	0.995112		0.00502431				1.089	0.994479	0.991323		0.991705	0.995541
								1.084	122.3	0.1223	1.084	0	0.990088		85.9	0.0859	1.084	0	0.995112		0.00502431				1.09	0.994495	0.991349		0.991732	0.995559
								1.085	122.6	0.1226	1.085	0	0.990088		86.2	0.0862	1.085	0	0.995112		0.00502431				1.091	0.994512	0.991375		0.991758	0.995576
								1.086	122.9	0.1229	1.086	0	0.990088		86.2	0.0862	1.086	0	0.995112		0.00502431				1.092	0.994528	0.991401		0.991785	0.995594
								1.087	123.4	0.1234	1.087	0	0.990088		86.3	0.0863	1.087	0	0.995112		0.00502431				1.093	0.994545	0.991426		0.991812	0.995611
								1.088	123.6	0.1236	1.088	0	0.990088		86.4	0.0864	1.088	0	0.995112		0.00502431				1.094	0.994561	0.991452		0.991838	0.995629
								1.089	123.7	0.1237	1.089	0	0.990088		86.5	0.0865	1.089	0	0.995112		0.00502431				1.095	0.994577	0.991478		0.991865	0.995646
								1.09	123.9	0.1239	1.09	0	0.990088		86.5	0.0865	1.09	0	0.995112		0.00502431				1.096	0.994594	0.991503		0.991891	0.995663
								1.091	123.9	0.1239	1.091	0	0.990088		86.6	0.0866	1.091	0	0.995112		0.00502431				1.097	0.99461	0.991529		0.991917	0.995681
								1.092	124	0.124	1.092	0	0.990088		86.6	0.0866	1.092	0	0.995112		0.00502431				1.098	0.994626	0.991554		0.991944	0.995698
								1.093	124	0.124	1.093	0	0.990088		86.6	0.0866	1.093	0	0.995112		0.00502431				1.099	0.994642	0.991579		0.99197	0.995715
								1.094	124	0.124	1.094	0	0.990088		86.6	0.0866	1.094	0	0.995112		0.00502431				1.1	0.994658	0.991605		0.991996	0.995732
								1.095	124	0.124	1.095	0	0.990088		86.8	0.0868	1.095	0	0.995112		0.00502431				1.101	0.994674	0.99163		0.992022	0.995749
								1.096	124.1	0.1241	1.096	0	0.990088		86.8	0.0868	1.096	0	0.995112		0.00502431				1.102	0.99469	0.991655		0.992048	0.995766
								1.097	124.5	0.1245	1.097	0	0.990088		86.9	0.0869	1.097	0	0.995112		0.00502431				1.103	0.994705	0.99168		0.992073	0.995783
								1.098	124.6	0.1246	1.098	0	0.990088		86.9	0.0869	1.098	0	0.995112		0.00502431				1.104	0.994721	0.991705		0.992099	0.9958
								1.099	124.9	0.1249	1.099	0	0.990088		87	0.087	1.099	0	0.995112		0.00502431				1.105	0.994737	0.991729		0.992125	0.995816
								1.1	125.1	0.1251	1.1	0	0.990088		87.1	0.0871	1.1	0	0.995112		0.00502431				1.106	0.994752	0.991754		0.99215	0.995833
								1.101	125.3	0.1253	1.101	0	0.990088		87.3	0.0873	1.101	0	0.995112		0.00502431				1.107	0.994768	0.991779		0.992176	0.99585
								1.102	125.3	0.1253	1.102	0	0.990088		87.6	0.0876	1.102	1	0.995601		0.00551307				1.108	0.994783	0.991803		0.992201	0.995866
								1.103	125.4	0.1254	1.103	0	0.990088		87.7	0.0877	1.103	0	0.995601		0.00551307				1.109	0.994799	0.991828		0.992226	0.995883
								1.104	125.5	0.1255	1.104	0	0.990088		88	0.088	1.104	0	0.995601		0.00551307				1.11	0.994814	0.991852		0.992251	0.995899
								1.105	125.6	0.1256	1.105	0	0.990088		88.2	0.0882	1.105	0	0.995601		0.00551307				1.111	0.994829	0.991877		0.992277	0.995915
								1.106	125.9	0.1259	1.106	0	0.990088		88.2	0.0882	1.106	0	0.995601		0.00551307				1.112	0.994844	0.991901		0.992302	0.995932
								1.107	125.9	0.1259	1.107	0	0.990088		88.2	0.0882	1.107	0	0.995601		0.00551307				1.113	0.99486	0.991925		0.992326	0.995948
								1.108	126.4	0.1264	1.108	1	0.990639		88.4	0.0884	1.108	0	0.995601		0.00496241				1.114	0.994875	0.991949		0.992351	0.995964
								1.109	126.4	0.1264	1.109	0	0.990639		88.5	0.0885	1.109	0	0.995601		0.00496241				1.115	0.99489	0.991973		0.992376	0.99598
								1.11	126.7	0.1267	1.11	0	0.990639		88.7	0.0887	1.11	0	0.995601		0.00496241				1.116	0.994905	0.991997		0.992401	0.995996
								1.111	126.8	0.1268	1.111	1	0.991189		89	0.089	1.111	0	0.995601		0.00441175				1.117	0.99492	0.992021		0.992425	0.996012
								1.112	127.1	0.1271	1.112	0	0.991189		89.1	0.0891	1.112	0	0.995601		0.00441175				1.118	0.994934	0.992045		0.99245	0.996028
								1.113	127.1	0.1271	1.113	0	0.991189		89.2	0.0892	1.113	0	0.995601		0.00441175				1.119	0.994949	0.992068		0.992474	0.996043
								1.114	127.9	0.1279	1.114	0	0.991189		89.2	0.0892	1.114	0	0.995601		0.00441175				1.12	0.994964	0.992092		0.992499	0.996059
								1.115	129	0.129	1.115	0	0.991189		89.2	0.0892	1.115	0	0.995601		0.00441175				1.121	0.994979	0.992115		0.992523	0.996075
								1.116	129.6	0.1296	1.116	0	0.991189		89.3	0.0893	1.116	0	0.995601		0.00441175				1.122	0.994993	0.992139		0.992547	0.996091
								1.117	129.7	0.1297	1.117	0	0.991189		89.6	0.0896	1.117	0	0.995601		0.00441175				1.123	0.995008	0.992162		0.992572	0.996106
								1.118	129.9	0.1299	1.118	0	0.991189		89.6	0.0896	1.118	0	0.995601		0.00441175				1.124	0.995022	0.992186		0.992596	0.996122
								1.119	129.9	0.1299	1.119	0	0.991189		89.7	0.0897	1.119	0	0.995601		0.00441175				1.125	0.995037	0.992209		0.99262	0.996137
								1.12	130.2	0.1302	1.12	0	0.991189		89.9	0.0899	1.12	0	0.995601		0.00441175				1.126	0.995051	0.992232		0.992643	0.996152
								1.121	130.5	0.1305	1.121	0	0.991189		89.9	0.0899	1.121	0	0.995601		0.00441175				1.127	0.995065	0.992255		0.992667	0.996168
								1.122	130.6	0.1306	1.122	0	0.991189		90.1	0.0901	1.122	0	0.995601		0.00441175				1.128	0.99508	0.992278		0.992691	0.996183
								1.123	130.8	0.1308	1.123	0	0.991189		90.4	0.0904	1.123	0	0.995601		0.00441175				1.129	0.995094	0.992301		0.992715	0.996198
								1.124	131.2	0.1312	1.124	0	0.991189		90.4	0.0904	1.124	0	0.995601		0.00441175				1.13	0.995108	0.992324		0.992738	0.996213
								1.125	131.4	0.1314	1.125	0	0.991189		90.6	0.0906	1.125	0	0.995601		0.00441175				1.131	0.995122	0.992347		0.992762	0.996228
								1.126	131.8	0.1318	1.126	0	0.991189		90.6	0.0906	1.126	0	0.995601		0.00441175				1.132	0.995136	0.992369		0.992785	0.996243
								1.127	132	0.132	1.127	0	0.991189		90.7	0.0907	1.127	0	0.995601		0.00441175				1.133	0.99515	0.992392		0.992809	0.996258
								1.128	132.5	0.1325	1.128	0	0.991189		90.8	0.0908	1.128	0	0.995601		0.00441175				1.134	0.995164	0.992415		0.992832	0.996273
								1.129	132.5	0.1325	1.129	0	0.991189		90.8	0.0908	1.129	0	0.995601		0.00441175				1.135	0.995178	0.992437		0.992855	0.996288
								1.13	132.5	0.1325	1.13	0	0.991189		90.9	0.0909	1.13	0	0.995601		0.00441175				1.136	0.995192	0.992459		0.992878	0.996303
								1.131	132.7	0.1327	1.131	0	0.991189		91.1	0.0911	1.131	0	0.995601		0.00441175				1.137	0.995205	0.992482		0.992901	0.996317
								1.132	132.8	0.1328	1.132	0	0.991189		91.2	0.0912	1.132	0	0.995601		0.00441175				1.138	0.995219	0.992504		0.992924	0.996332
								1.133	132.8	0.1328	1.133	0	0.991189		91.3	0.0913	1.133	0	0.995601		0.00441175				1.139	0.995233	0.992526		0.992947	0.996347
								1.134	133	0.133	1.134	0	0.991189		91.4	0.0914	1.134	0	0.995601		0.00441175				1.14	0.995246	0.992548		0.99297	0.996361
								1.135	133	0.133	1.135	0	0.991189		91.4	0.0914	1.135	0	0.995601		0.00441175				1.141	0.99526	0.99257		0.992993	0.996376
								1.136	133.4	0.1334	1.136	0	0.991189		91.5	0.0915	1.136	0	0.995601		0.00441175				1.142	0.995273	0.992592		0.993016	0.99639
								1.137	133.5	0.1335	1.137	0	0.991189		91.6	0.0916	1.137	0	0.995601		0.00441175				1.143	0.995287	0.992614		0.993038	0.996405
								1.138	133.8	0.1338	1.138	0	0.991189		91.9	0.0919	1.138	0	0.995601		0.00441175				1.144	0.9953	0.992636		0.993061	0.996419
								1.139	134	0.134	1.139	0	0.991189		91.9	0.0919	1.139	0	0.995601		0.00441175				1.145	0.995313	0.992658		0.993083	0.996433
								1.14	134.1	0.1341	1.14	0	0.991189		92	0.092	1.14	0	0.995601		0.00441175				1.146	0.995327	0.99268		0.993106	0.996447
								1.141	134.2	0.1342	1.141	0	0.991189		92.1	0.0921	1.141	0	0.995601		0.00441175				1.147	0.99534	0.992701		0.993128	0.996461
								1.142	134.2	0.1342	1.142	0	0.991189		92.2	0.0922	1.142	0	0.995601		0.00441175				1.148	0.995353	0.992723		0.99315	0.996475
								1.143	134.2	0.1342	1.143	0	0.991189		92.3	0.0923	1.143	0	0.995601		0.00441175				1.149	0.995366	0.992744		0.993172	0.99649
								1.144	134.3	0.1343	1.144	0	0.991189		92.6	0.0926	1.144	0	0.995601		0.00441175				1.15	0.995379	0.992766		0.993195	0.996503
								1.145	134.3	0.1343	1.145	0	0.991189		93	0.093	1.145	0	0.995601		0.00441175				1.151	0.995392	0.992787		0.993217	0.996517
								1.146	134.6	0.1346	1.146	0	0.991189		93.1	0.0931	1.146	0	0.995601		0.00441175				1.152	0.995405	0.992808		0.993239	0.996531
								1.147	135.3	0.1353	1.147	0	0.991189		93.2	0.0932	1.147	0	0.995601		0.00441175				1.153	0.995418	0.99283		0.99326	0.996545
								1.148	136.1	0.1361	1.148	0	0.991189		93.3	0.0933	1.148	0	0.995601		0.00441175				1.154	0.995431	0.992851		0.993282	0.996559
								1.149	137	0.137	1.149	0	0.991189		93.3	0.0933	1.149	0	0.995601		0.00441175				1.155	0.995444	0.992872		0.993304	0.996572
								1.15	137.1	0.1371	1.15	0	0.991189		93.5	0.0935	1.15	0	0.995601		0.00441175				1.156	0.995456	0.992893		0.993326	0.996586
								1.151	137.2	0.1372	1.151	0	0.991189		93.5	0.0935	1.151	0	0.995601		0.00441175				1.157	0.995469	0.992914		0.993347	0.9966
								1.152	137.2	0.1372	1.152	0	0.991189		93.7	0.0937	1.152	0	0.995601		0.00441175				1.158	0.995482	0.992935		0.993369	0.996613
								1.153	137.7	0.1377	1.153	0	0.991189		93.8	0.0938	1.153	0	0.995601		0.00441175				1.159	0.995494	0.992955		0.99339	0.996627
								1.154	137.8	0.1378	1.154	0	0.991189		94	0.094	1.154	0	0.995601		0.00441175				1.16	0.995507	0.992976		0.993412	0.99664
								1.155	138.2	0.1382	1.155	0	0.991189		94.1	0.0941	1.155	0	0.995601		0.00441175				1.161	0.995519	0.992997		0.993433	0.996654
								1.156	138.3	0.1383	1.156	0	0.991189		94.1	0.0941	1.156	0	0.995601		0.00441175				1.162	0.995532	0.993017		0.993454	0.996667
								1.157	138.4	0.1384	1.157	0	0.991189		94.3	0.0943	1.157	0	0.995601		0.00441175				1.163	0.995544	0.993038		0.993476	0.99668
								1.158	138.5	0.1385	1.158	0	0.991189		94.3	0.0943	1.158	0	0.995601		0.00441175				1.164	0.995556	0.993058		0.993497	0.996693
								1.159	138.6	0.1386	1.159	0	0.991189		94.3	0.0943	1.159	0	0.995601		0.00441175				1.165	0.995569	0.993079		0.993518	0.996706
								1.16	139.2	0.1392	1.16	0	0.991189		94.3	0.0943	1.16	0	0.995601		0.00441175				1.166	0.995581	0.993099		0.993539	0.99672
								1.161	139.4	0.1394	1.161	0	0.991189		94.4	0.0944	1.161	0	0.995601		0.00441175				1.167	0.995593	0.993119		0.99356	0.996733
								1.162	139.4	0.1394	1.162	0	0.991189		94.6	0.0946	1.162	0	0.995601		0.00441175				1.168	0.995605	0.99314		0.993581	0.996746
								1.163	139.4	0.1394	1.163	0	0.991189		95	0.095	1.163	0	0.995601		0.00441175				1.169	0.995617	0.99316		0.993601	0.996759
								1.164	139.5	0.1395	1.164	0	0.991189		95.1	0.0951	1.164	0	0.995601		0.00441175				1.17	0.995629	0.99318		0.993622	0.996771
								1.165	139.6	0.1396	1.165	0	0.991189		95.2	0.0952	1.165	0	0.995601		0.00441175				1.171	0.995641	0.9932		0.993643	0.996784
								1.166	139.7	0.1397	1.166	0	0.991189		95.3	0.0953	1.166	0	0.995601		0.00441175				1.172	0.995653	0.99322		0.993663	0.996797
								1.167	140	0.14	1.167	0	0.991189		95.4	0.0954	1.167	0	0.995601		0.00441175				1.173	0.995665	0.99324		0.993684	0.99681
								1.168	140.2	0.1402	1.168	0	0.991189		95.6	0.0956	1.168	0	0.995601		0.00441175				1.174	0.995677	0.993259		0.993704	0.996823
								1.169	140.3	0.1403	1.169	1	0.99174		96	0.096	1.169	0	0.995601		0.00386108				1.175	0.995689	0.993279		0.993725	0.996835
								1.17	141	0.141	1.17	0	0.99174		96	0.096	1.17	0	0.995601		0.00386108				1.176	0.995701	0.993299		0.993745	0.996848
								1.171	141.2	0.1412	1.171	0	0.99174		96.3	0.0963	1.171	0	0.995601		0.00386108				1.177	0.995712	0.993318		0.993765	0.99686
								1.172	141.3	0.1413	1.172	0	0.99174		96.4	0.0964	1.172	0	0.995601		0.00386108				1.178	0.995724	0.993338		0.993785	0.996873
								1.173	141.6	0.1416	1.173	1	0.992291		96.4	0.0964	1.173	0	0.995601		0.00331042				1.179	0.995736	0.993357		0.993806	0.996885
								1.174	142	0.142	1.174	0	0.992291		96.5	0.0965	1.174	0	0.995601		0.00331042				1.18	0.995747	0.993377		0.993826	0.996898
								1.175	142	0.142	1.175	0	0.992291		96.8	0.0968	1.175	0	0.995601		0.00331042				1.181	0.995759	0.993396		0.993846	0.99691
								1.176	142.3	0.1423	1.176	0	0.992291		96.9	0.0969	1.176	0	0.995601		0.00331042				1.182	0.99577	0.993415		0.993866	0.996922
								1.177	142.5	0.1425	1.177	0	0.992291		97.2	0.0972	1.177	0	0.995601		0.00331042				1.183	0.995782	0.993435		0.993885	0.996935
								1.178	142.5	0.1425	1.178	0	0.992291		97.4	0.0974	1.178	0	0.995601		0.00331042				1.184	0.995793	0.993454		0.993905	0.996947
								1.179	142.6	0.1426	1.179	0	0.992291		97.4	0.0974	1.179	0	0.995601		0.00331042				1.185	0.995804	0.993473		0.993925	0.996959
								1.18	142.8	0.1428	1.18	0	0.992291		97.4	0.0974	1.18	0	0.995601		0.00331042				1.186	0.995816	0.993492		0.993945	0.996971
								1.181	142.9	0.1429	1.181	0	0.992291		97.6	0.0976	1.181	0	0.995601		0.00331042				1.187	0.995827	0.993511		0.993964	0.996983
								1.182	143	0.143	1.182	0	0.992291		97.6	0.0976	1.182	0	0.995601		0.00331042				1.188	0.995838	0.99353		0.993984	0.996995
								1.183	143.1	0.1431	1.183	0	0.992291		97.7	0.0977	1.183	0	0.995601		0.00331042				1.189	0.995849	0.993549		0.994003	0.997007
								1.184	143.5	0.1435	1.184	0	0.992291		98.2	0.0982	1.184	0	0.995601		0.00331042				1.19	0.99586	0.993568		0.994023	0.997019
								1.185	143.8	0.1438	1.185	0	0.992291		98.2	0.0982	1.185	0	0.995601		0.00331042				1.191	0.995871	0.993586		0.994042	0.997031
								1.186	143.9	0.1439	1.186	0	0.992291		98.4	0.0984	1.186	0	0.995601		0.00331042				1.192	0.995882	0.993605		0.994061	0.997043
								1.187	143.9	0.1439	1.187	0	0.992291		98.4	0.0984	1.187	0	0.995601		0.00331042				1.193	0.995893	0.993624		0.99408	0.997054
								1.188	143.9	0.1439	1.188	0	0.992291		98.5	0.0985	1.188	0	0.995601		0.00331042				1.194	0.995904	0.993642		0.9941	0.997066
								1.189	144.8	0.1448	1.189	0	0.992291		99	0.099	1.189	0	0.995601		0.00331042				1.195	0.995915	0.993661		0.994119	0.997078
								1.19	145.3	0.1453	1.19	0	0.992291		99	0.099	1.19	0	0.995601		0.00331042				1.196	0.995926	0.993679		0.994138	0.997089
								1.191	145.6	0.1456	1.191	0	0.992291		99.1	0.0991	1.191	0	0.995601		0.00331042				1.197	0.995937	0.993697		0.994157	0.997101
								1.192	145.9	0.1459	1.192	0	0.992291		99.4	0.0994	1.192	0	0.995601		0.00331042				1.198	0.995948	0.993716		0.994176	0.997112
								1.193	146	0.146	1.193	0	0.992291		99.5	0.0995	1.193	0	0.995601		0.00331042				1.199	0.995958	0.993734		0.994195	0.997124
								1.194	146.1	0.1461	1.194	0	0.992291		99.6	0.0996	1.194	0	0.995601		0.00331042				1.2	0.995969	0.993752		0.994213	0.997135
								1.195	146.3	0.1463	1.195	0	0.992291		99.6	0.0996	1.195	0	0.995601		0.00331042				1.201	0.99598	0.99377		0.994232	0.997147
								1.196	146.4	0.1464	1.196	0	0.992291		99.7	0.0997	1.196	0	0.995601		0.00331042				1.202	0.99599	0.993788		0.994251	0.997158
								1.197	146.5	0.1465	1.197	0	0.992291		99.8	0.0998	1.197	0	0.995601		0.00331042				1.203	0.996001	0.993806		0.994269	0.997169
								1.198	146.5	0.1465	1.198	0	0.992291		99.9	0.0999	1.198	0	0.995601		0.00331042				1.204	0.996011	0.993824		0.994288	0.997181
								1.199	146.7	0.1467	1.199	0	0.992291		100	0.1	1.199	0	0.995601		0.00331042				1.205	0.996022	0.993842		0.994306	0.997192
								1.2	147.2	0.1472	1.2	0	0.992291		100.2	0.1002	1.2	0	0.995601		0.00331042				1.206	0.996032	0.99386		0.994325	0.997203
								1.201	148.2	0.1482	1.201	0	0.992291		100.3	0.1003	1.201	0	0.995601		0.00331042				1.207	0.996043	0.993878		0.994343	0.997214
								1.202	148.5	0.1485	1.202	0	0.992291		100.4	0.1004	1.202	0	0.995601		0.00331042				1.208	0.996053	0.993896		0.994362	0.997225
								1.203	148.6	0.1486	1.203	0	0.992291		100.4	0.1004	1.203	0	0.995601		0.00331042				1.209	0.996063	0.993913		0.99438	0.997236
								1.204	148.7	0.1487	1.204	1	0.992841		100.9	0.1009	1.204	0	0.995601		0.00275976				1.21	0.996073	0.993931		0.994398	0.997247
								1.205	148.7	0.1487	1.205	0	0.992841		101.1	0.1011	1.205	0	0.995601		0.00275976				1.211	0.996084	0.993949		0.994416	0.997258
								1.206	149.1	0.1491	1.206	0	0.992841		101.3	0.1013	1.206	0	0.995601		0.00275976				1.212	0.996094	0.993966		0.994434	0.997269
								1.207	150	0.15	1.207	0	0.992841		101.4	0.1014	1.207	0	0.995601		0.00275976				1.213	0.996104	0.993983		0.994452	0.99728
								1.208	150	0.15	1.208	0	0.992841		101.5	0.1015	1.208	0	0.995601		0.00275976				1.214	0.996114	0.994001		0.99447	0.997291
								1.209	150	0.15	1.209	0	0.992841		101.6	0.1016	1.209	0	0.995601		0.00275976				1.215	0.996124	0.994018		0.994488	0.997302
								1.21	150.2	0.1502	1.21	0	0.992841		101.7	0.1017	1.21	0	0.995601		0.00275976				1.216	0.996134	0.994035		0.994506	0.997312
								1.211	150.3	0.1503	1.211	0	0.992841		102.1	0.1021	1.211	0	0.995601		0.00275976				1.217	0.996144	0.994053		0.994524	0.997323
								1.212	150.4	0.1504	1.212	0	0.992841		102.1	0.1021	1.212	0	0.995601		0.00275976				1.218	0.996154	0.99407		0.994541	0.997334
								1.213	150.5	0.1505	1.213	0	0.992841		102.4	0.1024	1.213	0	0.995601		0.00275976				1.219	0.996164	0.994087		0.994559	0.997344
								1.214	151.1	0.1511	1.214	0	0.992841		102.4	0.1024	1.214	0	0.995601		0.00275976				1.22	0.996174	0.994104		0.994577	0.997355
								1.215	151.2	0.1512	1.215	0	0.992841		102.4	0.1024	1.215	0	0.995601		0.00275976				1.221	0.996184	0.994121		0.994594	0.997365
								1.216	151.9	0.1519	1.216	0	0.992841		102.5	0.1025	1.216	0	0.995601		0.00275976				1.222	0.996193	0.994138		0.994612	0.997376
								1.217	152	0.152	1.217	0	0.992841		102.5	0.1025	1.217	0	0.995601		0.00275976				1.223	0.996203	0.994155		0.994629	0.997386
								1.218	152.4	0.1524	1.218	0	0.992841		102.6	0.1026	1.218	0	0.995601		0.00275976				1.224	0.996213	0.994172		0.994647	0.997397
								1.219	152.4	0.1524	1.219	0	0.992841		102.8	0.1028	1.219	0	0.995601		0.00275976				1.225	0.996222	0.994188		0.994664	0.997407
								1.22	152.4	0.1524	1.22	0	0.992841		102.9	0.1029	1.22	0	0.995601		0.00275976				1.226	0.996232	0.994205		0.994681	0.997417
								1.221	152.4	0.1524	1.221	0	0.992841		102.9	0.1029	1.221	0	0.995601		0.00275976				1.227	0.996242	0.994222		0.994698	0.997428
								1.222	152.5	0.1525	1.222	0	0.992841		103	0.103	1.222	0	0.995601		0.00275976				1.228	0.996251	0.994238		0.994716	0.997438
								1.223	152.8	0.1528	1.223	0	0.992841		103	0.103	1.223	0	0.995601		0.00275976				1.229	0.996261	0.994255		0.994733	0.997448
								1.224	153.2	0.1532	1.224	0	0.992841		103.1	0.1031	1.224	0	0.995601		0.00275976				1.23	0.99627	0.994271		0.99475	0.997458
								1.225	153.8	0.1538	1.225	0	0.992841		103.7	0.1037	1.225	0	0.995601		0.00275976				1.231	0.996279	0.994288		0.994767	0.997468
								1.226	154.1	0.1541	1.226	0	0.992841		103.8	0.1038	1.226	0	0.995601		0.00275976				1.232	0.996289	0.994304		0.994784	0.997479
								1.227	154.3	0.1543	1.227	0	0.992841		104.1	0.1041	1.227	0	0.995601		0.00275976				1.233	0.996298	0.994321		0.994801	0.997489
								1.228	154.7	0.1547	1.228	0	0.992841		104.1	0.1041	1.228	0	0.995601		0.00275976				1.234	0.996308	0.994337		0.994817	0.997499
								1.229	154.7	0.1547	1.229	0	0.992841		104.2	0.1042	1.229	0	0.995601		0.00275976				1.235	0.996317	0.994353		0.994834	0.997509
								1.23	154.7	0.1547	1.23	0	0.992841		104.4	0.1044	1.23	0	0.995601		0.00275976				1.236	0.996326	0.994369		0.994851	0.997518
								1.231	155.1	0.1551	1.231	0	0.992841		104.5	0.1045	1.231	0	0.995601		0.00275976				1.237	0.996335	0.994385		0.994868	0.997528
								1.232	155.1	0.1551	1.232	0	0.992841		104.5	0.1045	1.232	0	0.995601		0.00275976				1.238	0.996344	0.994402		0.994884	0.997538
								1.233	155.4	0.1554	1.233	0	0.992841		104.6	0.1046	1.233	0	0.995601		0.00275976				1.239	0.996354	0.994418		0.994901	0.997548
								1.234	155.7	0.1557	1.234	0	0.992841		104.9	0.1049	1.234	0	0.995601		0.00275976				1.24	0.996363	0.994434		0.994917	0.997558
								1.235	155.8	0.1558	1.235	0	0.992841		104.9	0.1049	1.235	0	0.995601		0.00275976				1.241	0.996372	0.994449		0.994934	0.997567
								1.236	156	0.156	1.236	0	0.992841		105.1	0.1051	1.236	0	0.995601		0.00275976				1.242	0.996381	0.994465		0.99495	0.997577
								1.237	156.6	0.1566	1.237	0	0.992841		105.2	0.1052	1.237	0	0.995601		0.00275976				1.243	0.99639	0.994481		0.994966	0.997587
								1.238	156.7	0.1567	1.238	0	0.992841		105.3	0.1053	1.238	0	0.995601		0.00275976				1.244	0.996399	0.994497		0.994983	0.997596
								1.239	156.7	0.1567	1.239	0	0.992841		105.5	0.1055	1.239	0	0.995601		0.00275976				1.245	0.996407	0.994513		0.994999	0.997606
								1.24	156.9	0.1569	1.24	0	0.992841		105.9	0.1059	1.24	0	0.995601		0.00275976				1.246	0.996416	0.994528		0.995015	0.997615
								1.241	157.5	0.1575	1.241	0	0.992841		105.9	0.1059	1.241	0	0.995601		0.00275976				1.247	0.996425	0.994544		0.995031	0.997625
								1.242	158.2	0.1582	1.242	0	0.992841		106.4	0.1064	1.242	0	0.995601		0.00275976				1.248	0.996434	0.99456		0.995047	0.997634
								1.243	158.2	0.1582	1.243	0	0.992841		106.4	0.1064	1.243	0	0.995601		0.00275976				1.249	0.996443	0.994575		0.995063	0.997644
								1.244	158.9	0.1589	1.244	0	0.992841		106.5	0.1065	1.244	0	0.995601		0.00275976				1.25	0.996451	0.99459		0.995079	0.997653
								1.245	158.9	0.1589	1.245	0	0.992841		107	0.107	1.245	0	0.995601		0.00275976				1.251	0.99646	0.994606		0.995095	0.997662
								1.246	158.9	0.1589	1.246	0	0.992841		107.1	0.1071	1.246	0	0.995601		0.00275976				1.252	0.996469	0.994621		0.995111	0.997672
								1.247	159.4	0.1594	1.247	0	0.992841		107.1	0.1071	1.247	0	0.995601		0.00275976				1.253	0.996477	0.994637		0.995127	0.997681
								1.248	159.5	0.1595	1.248	0	0.992841		107.1	0.1071	1.248	0	0.995601		0.00275976				1.254	0.996486	0.994652		0.995143	0.99769
								1.249	159.6	0.1596	1.249	0	0.992841		107.1	0.1071	1.249	0	0.995601		0.00275976				1.255	0.996495	0.994667		0.995158	0.997699
								1.25	160.1	0.1601	1.25	0	0.992841		107.3	0.1073	1.25	0	0.995601		0.00275976				1.256	0.996503	0.994682		0.995174	0.997709
								1.251	160.4	0.1604	1.251	0	0.992841		107.4	0.1074	1.251	0	0.995601		0.00275976				1.257	0.996512	0.994697		0.99519	0.997718
								1.252	160.5	0.1605	1.252	0	0.992841		107.4	0.1074	1.252	0	0.995601		0.00275976				1.258	0.99652	0.994712		0.995205	0.997727
								1.253	160.6	0.1606	1.253	0	0.992841		107.5	0.1075	1.253	0	0.995601		0.00275976				1.259	0.996528	0.994727		0.995221	0.997736
								1.254	161.2	0.1612	1.254	0	0.992841		107.6	0.1076	1.254	0	0.995601		0.00275976				1.26	0.996537	0.994742		0.995236	0.997745
								1.255	161.4	0.1614	1.255	0	0.992841		107.7	0.1077	1.255	0	0.995601		0.00275976				1.261	0.996545	0.994757		0.995252	0.997754
								1.256	162.1	0.1621	1.256	1	0.993392		107.8	0.1078	1.256	0	0.995601		0.0022091				1.262	0.996554	0.994772		0.995267	0.997763
								1.257	162.7	0.1627	1.257	1	0.993943		107.9	0.1079	1.257	0	0.995601		0.00165844				1.263	0.996562	0.994787		0.995282	0.997772
								1.258	163.1	0.1631	1.258	0	0.993943		108.7	0.1087	1.258	0	0.995601		0.00165844				1.264	0.99657	0.994802		0.995298	0.997781
								1.259	163.2	0.1632	1.259	0	0.993943		108.7	0.1087	1.259	1	0.99609		0.0021472				1.265	0.996578	0.994817		0.995313	0.997789
								1.26	164	0.164	1.26	0	0.993943		108.8	0.1088	1.26	0	0.99609		0.0021472				1.266	0.996586	0.994831		0.995328	0.997798
								1.261	164.4	0.1644	1.261	0	0.993943		109.1	0.1091	1.261	0	0.99609		0.0021472				1.267	0.996595	0.994846		0.995343	0.997807
								1.262	165.3	0.1653	1.262	0	0.993943		109.1	0.1091	1.262	0	0.99609		0.0021472				1.268	0.996603	0.99486		0.995358	0.997816
								1.263	165.9	0.1659	1.263	0	0.993943		109.2	0.1092	1.263	0	0.99609		0.0021472				1.269	0.996611	0.994875		0.995373	0.997824
								1.264	166	0.166	1.264	0	0.993943		109.3	0.1093	1.264	0	0.99609		0.0021472				1.27	0.996619	0.994889		0.995388	0.997833
								1.265	166.3	0.1663	1.265	0	0.993943		109.3	0.1093	1.265	0	0.99609		0.0021472				1.271	0.996627	0.994904		0.995403	0.997842
								1.266	166.3	0.1663	1.266	0	0.993943		109.4	0.1094	1.266	0	0.99609		0.0021472				1.272	0.996635	0.994918		0.995418	0.99785
								1.267	166.5	0.1665	1.267	0	0.993943		109.7	0.1097	1.267	0	0.99609		0.0021472				1.273	0.996643	0.994933		0.995433	0.997859
								1.268	166.6	0.1666	1.268	0	0.993943		110.4	0.1104	1.268	0	0.99609		0.0021472				1.274	0.996651	0.994947		0.995448	0.997867
								1.269	167.3	0.1673	1.269	0	0.993943		110.5	0.1105	1.269	0	0.99609		0.0021472				1.275	0.996659	0.994961		0.995462	0.997876
								1.27	167.6	0.1676	1.27	0	0.993943		110.5	0.1105	1.27	0	0.99609		0.0021472				1.276	0.996667	0.994975		0.995477	0.997884
								1.271	167.9	0.1679	1.271	0	0.993943		110.5	0.1105	1.271	0	0.99609		0.0021472				1.277	0.996674	0.99499		0.995492	0.997893
								1.272	167.9	0.1679	1.272	0	0.993943		110.9	0.1109	1.272	0	0.99609		0.0021472				1.278	0.996682	0.995004		0.995506	0.997901
								1.273	168.4	0.1684	1.273	0	0.993943		110.9	0.1109	1.273	0	0.99609		0.0021472				1.279	0.99669	0.995018		0.995521	0.997909
								1.274	169	0.169	1.274	0	0.993943		111	0.111	1.274	0	0.99609		0.0021472				1.28	0.996698	0.995032		0.995535	0.997918
								1.275	169.8	0.1698	1.275	0	0.993943		111	0.111	1.275	0	0.99609		0.0021472				1.281	0.996705	0.995046		0.99555	0.997926
								1.276	169.9	0.1699	1.276	0	0.993943		111	0.111	1.276	0	0.99609		0.0021472				1.282	0.996713	0.99506		0.995564	0.997934
								1.277	170.4	0.1704	1.277	0	0.993943		111.4	0.1114	1.277	0	0.99609		0.0021472				1.283	0.996721	0.995074		0.995579	0.997942
								1.278	170.9	0.1709	1.278	0	0.993943		111.6	0.1116	1.278	0	0.99609		0.0021472				1.284	0.996728	0.995087		0.995593	0.997951
								1.279	171.3	0.1713	1.279	0	0.993943		111.6	0.1116	1.279	0	0.99609		0.0021472				1.285	0.996736	0.995101		0.995607	0.997959
								1.28	171.4	0.1714	1.28	0	0.993943		112.8	0.1128	1.28	0	0.99609		0.0021472				1.286	0.996743	0.995115		0.995621	0.997967
								1.281	172.3	0.1723	1.281	0	0.993943		113.1	0.1131	1.281	0	0.99609		0.0021472				1.287	0.996751	0.995129		0.995636	0.997975
								1.282	172.5	0.1725	1.282	0	0.993943		113.5	0.1135	1.282	0	0.99609		0.0021472				1.288	0.996758	0.995142		0.99565	0.997983
								1.283	172.6	0.1726	1.283	0	0.993943		114.3	0.1143	1.283	0	0.99609		0.0021472				1.289	0.996766	0.995156		0.995664	0.997991
								1.284	172.8	0.1728	1.284	0	0.993943		114.3	0.1143	1.284	0	0.99609		0.0021472				1.29	0.996773	0.99517		0.995678	0.997999
								1.285	173.1	0.1731	1.285	0	0.993943		114.5	0.1145	1.285	0	0.99609		0.0021472				1.291	0.996781	0.995183		0.995692	0.998007
								1.286	173.2	0.1732	1.286	0	0.993943		114.6	0.1146	1.286	1	0.996579		0.00263596				1.292	0.996788	0.995197		0.995706	0.998015
								1.287	173.4	0.1734	1.287	0	0.993943		114.6	0.1146	1.287	0	0.996579		0.00263596				1.293	0.996795	0.99521		0.99572	0.998023
								1.288	173.5	0.1735	1.288	1	0.994493		114.7	0.1147	1.288	0	0.996579		0.0020853				1.294	0.996803	0.995223		0.995733	0.998031
								1.289	173.9	0.1739	1.289	0	0.994493		114.8	0.1148	1.289	0	0.996579		0.0020853				1.295	0.99681	0.995237		0.995747	0.998039
								1.29	174.9	0.1749	1.29	0	0.994493		115.1	0.1151	1.29	0	0.996579		0.0020853				1.296	0.996817	0.99525		0.995761	0.998046
								1.291	175.1	0.1751	1.291	0	0.994493		115.3	0.1153	1.291	0	0.996579		0.0020853				1.297	0.996825	0.995263		0.995775	0.998054
								1.292	175.3	0.1753	1.292	1	0.995044		115.3	0.1153	1.292	0	0.996579		0.00153464				1.298	0.996832	0.995277		0.995788	0.998062
								1.293	175.4	0.1754	1.293	0	0.995044		115.7	0.1157	1.293	0	0.996579		0.00153464				1.299	0.996839	0.99529		0.995802	0.99807
								1.294	175.9	0.1759	1.294	0	0.995044		115.7	0.1157	1.294	0	0.996579		0.00153464				1.3	0.996846	0.995303		0.995816	0.998077
								1.295	176.4	0.1764	1.295	0	0.995044		115.7	0.1157	1.295	0	0.996579		0.00153464				1.301	0.996853	0.995316		0.995829	0.998085
								1.296	176.6	0.1766	1.296	0	0.995044		115.8	0.1158	1.296	0	0.996579		0.00153464				1.302	0.99686	0.995329		0.995843	0.998093
								1.297	176.7	0.1767	1.297	1	0.995595		115.9	0.1159	1.297	0	0.996579		0.000983976				1.303	0.996867	0.995342		0.995856	0.9981
								1.298	176.7	0.1767	1.298	0	0.995595		115.9	0.1159	1.298	0	0.996579		0.000983976				1.304	0.996874	0.995355		0.99587	0.998108
								1.299	177.2	0.1772	1.299	0	0.995595		116.1	0.1161	1.299	0	0.996579		0.000983976				1.305	0.996881	0.995368		0.995883	0.998115
								1.3	177.3	0.1773	1.3	0	0.995595		116.3	0.1163	1.3	0	0.996579		0.000983976				1.306	0.996888	0.995381		0.995896	0.998123
								1.301	177.5	0.1775	1.301	0	0.995595		116.4	0.1164	1.301	0	0.996579		0.000983976				1.307	0.996895	0.995394		0.995909	0.99813
								1.302	177.8	0.1778	1.302	0	0.995595		116.5	0.1165	1.302	0	0.996579		0.000983976				1.308	0.996902	0.995407		0.995923	0.998138
								1.303	177.9	0.1779	1.303	0	0.995595		116.6	0.1166	1.303	0	0.996579		0.000983976				1.309	0.996909	0.995419		0.995936	0.998145
								1.304	177.9	0.1779	1.304	0	0.995595		116.6	0.1166	1.304	0	0.996579		0.000983976				1.31	0.996916	0.995432		0.995949	0.998152
								1.305	178.3	0.1783	1.305	0	0.995595		116.7	0.1167	1.305	0	0.996579		0.000983976				1.311	0.996923	0.995445		0.995962	0.99816
								1.306	178.6	0.1786	1.306	0	0.995595		117	0.117	1.306	0	0.996579		0.000983976				1.312	0.996929	0.995457		0.995975	0.998167
								1.307	178.7	0.1787	1.307	0	0.995595		117.1	0.1171	1.307	0	0.996579		0.000983976				1.313	0.996936	0.99547		0.995988	0.998174
								1.308	179	0.179	1.308	0	0.995595		117.2	0.1172	1.308	0	0.996579		0.000983976				1.314	0.996943	0.995483		0.996001	0.998182
								1.309	181.7	0.1817	1.309	0	0.995595		117.3	0.1173	1.309	0	0.996579		0.000983976				1.315	0.99695	0.995495		0.996014	0.998189
								1.31	182	0.182	1.31	0	0.995595		117.4	0.1174	1.31	0	0.996579		0.000983976				1.316	0.996956	0.995508		0.996027	0.998196
								1.311	182	0.182	1.311	0	0.995595		117.5	0.1175	1.311	0	0.996579		0.000983976				1.317	0.996963	0.99552		0.99604	0.998203
								1.312	182.9	0.1829	1.312	0	0.995595		117.6	0.1176	1.312	0	0.996579		0.000983976				1.318	0.99697	0.995532		0.996053	0.99821
								1.313	183.8	0.1838	1.313	0	0.995595		118	0.118	1.313	0	0.996579		0.000983976				1.319	0.996976	0.995545		0.996066	0.998218
								1.314	185.4	0.1854	1.314	0	0.995595		118.2	0.1182	1.314	0	0.996579		0.000983976				1.32	0.996983	0.995557		0.996078	0.998225
								1.315	185.5	0.1855	1.315	0	0.995595		118.7	0.1187	1.315	0	0.996579		0.000983976				1.321	0.996989	0.995569		0.996091	0.998232
								1.316	185.7	0.1857	1.316	0	0.995595		118.8	0.1188	1.316	0	0.996579		0.000983976				1.322	0.996996	0.995582		0.996104	0.998239
								1.317	185.7	0.1857	1.317	0	0.995595		119.3	0.1193	1.317	0	0.996579		0.000983976				1.323	0.997003	0.995594		0.996116	0.998246
								1.318	186.1	0.1861	1.318	0	0.995595		119.9	0.1199	1.318	0	0.996579		0.000983976				1.324	0.997009	0.995606		0.996129	0.998253
								1.319	186.4	0.1864	1.319	0	0.995595		120	0.12	1.319	0	0.996579		0.000983976				1.325	0.997015	0.995618		0.996141	0.99826
								1.32	186.4	0.1864	1.32	0	0.995595		120.2	0.1202	1.32	0	0.996579		0.000983976				1.326	0.997022	0.99563		0.996154	0.998267
								1.321	186.8	0.1868	1.321	0	0.995595		120.2	0.1202	1.321	0	0.996579		0.000983976				1.327	0.997028	0.995642		0.996166	0.998274
								1.322	187.3	0.1873	1.322	0	0.995595		120.2	0.1202	1.322	0	0.996579		0.000983976				1.328	0.997035	0.995654		0.996179	0.99828
								1.323	187.4	0.1874	1.323	0	0.995595		120.8	0.1208	1.323	0	0.996579		0.000983976				1.329	0.997041	0.995666		0.996191	0.998287
								1.324	187.8	0.1878	1.324	0	0.995595		120.9	0.1209	1.324	0	0.996579		0.000983976				1.33	0.997047	0.995678		0.996203	0.998294
								1.325	188.2	0.1882	1.325	0	0.995595		121	0.121	1.325	0	0.996579		0.000983976				1.331	0.997054	0.99569		0.996216	0.998301
								1.326	188.6	0.1886	1.326	0	0.995595		121.1	0.1211	1.326	0	0.996579		0.000983976				1.332	0.99706	0.995702		0.996228	0.998308
								1.327	188.7	0.1887	1.327	0	0.995595		121.1	0.1211	1.327	0	0.996579		0.000983976				1.333	0.997066	0.995714		0.99624	0.998314
								1.328	189.2	0.1892	1.328	0	0.995595		121.5	0.1215	1.328	0	0.996579		0.000983976				1.334	0.997072	0.995725		0.996252	0.998321
								1.329	189.4	0.1894	1.329	0	0.995595		121.6	0.1216	1.329	0	0.996579		0.000983976				1.335	0.997079	0.995737		0.996264	0.998328
								1.33	189.7	0.1897	1.33	0	0.995595		121.7	0.1217	1.33	0	0.996579		0.000983976				1.336	0.997085	0.995749		0.996276	0.998334
								1.331	189.8	0.1898	1.331	0	0.995595		122.5	0.1225	1.331	0	0.996579		0.000983976				1.337	0.997091	0.995761		0.996288	0.998341
								1.332	189.8	0.1898	1.332	0	0.995595		122.5	0.1225	1.332	0	0.996579		0.000983976				1.338	0.997097	0.995772		0.9963	0.998348
								1.333	190.2	0.1902	1.333	0	0.995595		122.5	0.1225	1.333	0	0.996579		0.000983976				1.339	0.997103	0.995784		0.996312	0.998354
								1.334	190.5	0.1905	1.334	0	0.995595		122.7	0.1227	1.334	0	0.996579		0.000983976				1.34	0.997109	0.995795		0.996324	0.998361
								1.335	191	0.191	1.335	0	0.995595		122.8	0.1228	1.335	0	0.996579		0.000983976				1.341	0.997115	0.995807		0.996336	0.998367
								1.336	191	0.191	1.336	0	0.995595		122.9	0.1229	1.336	0	0.996579		0.000983976				1.342	0.997121	0.995818		0.996348	0.998374
								1.337	191.1	0.1911	1.337	0	0.995595		123	0.123	1.337	0	0.996579		0.000983976				1.343	0.997127	0.99583		0.99636	0.99838
								1.338	191.7	0.1917	1.338	0	0.995595		123.2	0.1232	1.338	0	0.996579		0.000983976				1.344	0.997133	0.995841		0.996372	0.998387
								1.339	191.8	0.1918	1.339	0	0.995595		123.3	0.1233	1.339	0	0.996579		0.000983976				1.345	0.997139	0.995852		0.996383	0.998393
								1.34	192.4	0.1924	1.34	0	0.995595		123.8	0.1238	1.34	0	0.996579		0.000983976				1.346	0.997145	0.995864		0.996395	0.998399
								1.341	192.4	0.1924	1.341	0	0.995595		123.8	0.1238	1.341	0	0.996579		0.000983976				1.347	0.997151	0.995875		0.996407	0.998406
								1.342	192.6	0.1926	1.342	0	0.995595		123.8	0.1238	1.342	0	0.996579		0.000983976				1.348	0.997157	0.995886		0.996418	0.998412
								1.343	193.4	0.1934	1.343	0	0.995595		123.8	0.1238	1.343	0	0.996579		0.000983976				1.349	0.997163	0.995898		0.99643	0.998418
								1.344	193.4	0.1934	1.344	0	0.995595		124	0.124	1.344	0	0.996579		0.000983976				1.35	0.997169	0.995909		0.996442	0.998425
								1.345	193.5	0.1935	1.345	0	0.995595		124.2	0.1242	1.345	0	0.996579		0.000983976				1.351	0.997175	0.99592		0.996453	0.998431
								1.346	194.3	0.1943	1.346	0	0.995595		124.4	0.1244	1.346	0	0.996579		0.000983976				1.352	0.99718	0.995931		0.996465	0.998437
								1.347	194.6	0.1946	1.347	0	0.995595		124.7	0.1247	1.347	0	0.996579		0.000983976				1.353	0.997186	0.995942		0.996476	0.998444
								1.348	194.6	0.1946	1.348	0	0.995595		124.9	0.1249	1.348	0	0.996579		0.000983976				1.354	0.997192	0.995953		0.996487	0.99845
								1.349	195	0.195	1.349	0	0.995595		124.9	0.1249	1.349	0	0.996579		0.000983976				1.355	0.997198	0.995964		0.996499	0.998456
								1.35	195.6	0.1956	1.35	0	0.995595		125.7	0.1257	1.35	0	0.996579		0.000983976				1.356	0.997203	0.995975		0.99651	0.998462
								1.351	196.2	0.1962	1.351	0	0.995595		126.5	0.1265	1.351	0	0.996579		0.000983976				1.357	0.997209	0.995986		0.996521	0.998468
								1.352	196.5	0.1965	1.352	0	0.995595		126.6	0.1266	1.352	0	0.996579		0.000983976				1.358	0.997215	0.995997		0.996533	0.998474
								1.353	196.8	0.1968	1.353	0	0.995595		126.7	0.1267	1.353	0	0.996579		0.000983976				1.359	0.99722	0.996008		0.996544	0.99848
								1.354	197.2	0.1972	1.354	0	0.995595		126.9	0.1269	1.354	0	0.996579		0.000983976				1.36	0.997226	0.996018		0.996555	0.998486
								1.355	197.5	0.1975	1.355	0	0.995595		126.9	0.1269	1.355	0	0.996579		0.000983976				1.361	0.997231	0.996029		0.996566	0.998492
								1.356	198.4	0.1984	1.356	0	0.995595		126.9	0.1269	1.356	0	0.996579		0.000983976				1.362	0.997237	0.99604		0.996577	0.998498
								1.357	198.6	0.1986	1.357	0	0.995595		127	0.127	1.357	0	0.996579		0.000983976				1.363	0.997243	0.996051		0.996588	0.998504
								1.358	199.2	0.1992	1.358	0	0.995595		127.1	0.1271	1.358	0	0.996579		0.000983976				1.364	0.997248	0.996061		0.996599	0.99851
								1.359	200.5	0.2005	1.359	0	0.995595		127.5	0.1275	1.359	0	0.996579		0.000983976				1.365	0.997254	0.996072		0.99661	0.998516
								1.36	200.9	0.2009	1.36	0	0.995595		127.6	0.1276	1.36	0	0.996579		0.000983976				1.366	0.997259	0.996083		0.996621	0.998522
								1.361	201	0.201	1.361	0	0.995595		128.1	0.1281	1.361	0	0.996579		0.000983976				1.367	0.997264	0.996093		0.996632	0.998528
								1.362	201.6	0.2016	1.362	0	0.995595		128.2	0.1282	1.362	0	0.996579		0.000983976				1.368	0.99727	0.996104		0.996643	0.998534
								1.363	201.8	0.2018	1.363	0	0.995595		128.3	0.1283	1.363	0	0.996579		0.000983976				1.369	0.997275	0.996114		0.996654	0.99854
								1.364	202	0.202	1.364	0	0.995595		128.3	0.1283	1.364	0	0.996579		0.000983976				1.37	0.997281	0.996125		0.996665	0.998546
								1.365	202.1	0.2021	1.365	0	0.995595		128.5	0.1285	1.365	0	0.996579		0.000983976				1.371	0.997286	0.996135		0.996676	0.998551
								1.366	203	0.203	1.366	0	0.995595		128.5	0.1285	1.366	0	0.996579		0.000983976				1.372	0.997291	0.996146		0.996686	0.998557
								1.367	203.4	0.2034	1.367	0	0.995595		128.6	0.1286	1.367	0	0.996579		0.000983976				1.373	0.997297	0.996156		0.996697	0.998563
								1.368	203.7	0.2037	1.368	0	0.995595		128.9	0.1289	1.368	0	0.996579		0.000983976				1.374	0.997302	0.996166		0.996708	0.998569
								1.369	204.5	0.2045	1.369	0	0.995595		129.5	0.1295	1.369	0	0.996579		0.000983976				1.375	0.997307	0.996177		0.996719	0.998574
								1.37	204.7	0.2047	1.37	0	0.995595		130	0.13	1.37	0	0.996579		0.000983976				1.376	0.997313	0.996187		0.996729	0.99858
								1.371	205.2	0.2052	1.371	0	0.995595		130.1	0.1301	1.371	0	0.996579		0.000983976				1.377	0.997318	0.996197		0.99674	0.998586
								1.372	207.4	0.2074	1.372	0	0.995595		130.2	0.1302	1.372	0	0.996579		0.000983976				1.378	0.997323	0.996207		0.99675	0.998591
								1.373	208	0.208	1.373	0	0.995595		130.6	0.1306	1.373	0	0.996579		0.000983976				1.379	0.997328	0.996217		0.996761	0.998597
								1.374	208.3	0.2083	1.374	0	0.995595		130.8	0.1308	1.374	0	0.996579		0.000983976				1.38	0.997333	0.996228		0.996771	0.998602
								1.375	208.4	0.2084	1.375	0	0.995595		130.9	0.1309	1.375	0	0.996579		0.000983976				1.381	0.997339	0.996238		0.996782	0.998608
								1.376	208.5	0.2085	1.376	0	0.995595		131	0.131	1.376	0	0.996579		0.000983976				1.382	0.997344	0.996248		0.996792	0.998613
								1.377	209.5	0.2095	1.377	0	0.995595		131.5	0.1315	1.377	0	0.996579		0.000983976				1.383	0.997349	0.996258		0.996802	0.998619
								1.378	209.5	0.2095	1.378	0	0.995595		131.6	0.1316	1.378	0	0.996579		0.000983976				1.384	0.997354	0.996268		0.996813	0.998624
								1.379	209.6	0.2096	1.379	0	0.995595		131.6	0.1316	1.379	0	0.996579		0.000983976				1.385	0.997359	0.996278		0.996823	0.99863
								1.38	210.6	0.2106	1.38	0	0.995595		131.7	0.1317	1.38	0	0.996579		0.000983976				1.386	0.997364	0.996288		0.996833	0.998635
								1.381	210.8	0.2108	1.381	0	0.995595		131.8	0.1318	1.381	0	0.996579		0.000983976				1.387	0.997369	0.996298		0.996844	0.998641
								1.382	211.3	0.2113	1.382	0	0.995595		132	0.132	1.382	0	0.996579		0.000983976				1.388	0.997374	0.996308		0.996854	0.998646
								1.383	212.7	0.2127	1.383	0	0.995595		132.5	0.1325	1.383	0	0.996579		0.000983976				1.389	0.997379	0.996317		0.996864	0.998652
								1.384	212.9	0.2129	1.384	0	0.995595		132.7	0.1327	1.384	0	0.996579		0.000983976				1.39	0.997384	0.996327		0.996874	0.998657
								1.385	213.6	0.2136	1.385	0	0.995595		132.9	0.1329	1.385	0	0.996579		0.000983976				1.391	0.997389	0.996337		0.996884	0.998662
								1.386	214	0.214	1.386	0	0.995595		133	0.133	1.386	0	0.996579		0.000983976				1.392	0.997394	0.996347		0.996894	0.998668
								1.387	214.6	0.2146	1.387	0	0.995595		133	0.133	1.387	0	0.996579		0.000983976				1.393	0.997399	0.996356		0.996904	0.998673
								1.388	214.8	0.2148	1.388	0	0.995595		133.2	0.1332	1.388	0	0.996579		0.000983976				1.394	0.997404	0.996366		0.996914	0.998678
								1.389	215.4	0.2154	1.389	0	0.995595		133.3	0.1333	1.389	0	0.996579		0.000983976				1.395	0.997409	0.996376		0.996924	0.998683
								1.39	215.5	0.2155	1.39	0	0.995595		133.4	0.1334	1.39	0	0.996579		0.000983976				1.396	0.997413	0.996385		0.996934	0.998689
								1.391	215.7	0.2157	1.391	0	0.995595		133.5	0.1335	1.391	0	0.996579		0.000983976				1.397	0.997418	0.996395		0.996944	0.998694
								1.392	216.7	0.2167	1.392	0	0.995595		133.6	0.1336	1.392	0	0.996579		0.000983976				1.398	0.997423	0.996405		0.996954	0.998699
								1.393	217	0.217	1.393	0	0.995595		133.6	0.1336	1.393	0	0.996579		0.000983976				1.399	0.997428	0.996414		0.996964	0.998704
								1.394	217.3	0.2173	1.394	0	0.995595		133.6	0.1336	1.394	0	0.996579		0.000983976				1.4	0.997433	0.996424		0.996974	0.998709
								1.395	217.8	0.2178	1.395	0	0.995595		133.7	0.1337	1.395	0	0.996579		0.000983976				1.401	0.997437	0.996433		0.996984	0.998715
								1.396	218.3	0.2183	1.396	0	0.995595		133.9	0.1339	1.396	0	0.996579		0.000983976				1.402	0.997442	0.996443		0.996993	0.99872
								1.397	218.5	0.2185	1.397	0	0.995595		134	0.134	1.397	0	0.996579		0.000983976				1.403	0.997447	0.996452		0.997003	0.998725
								1.398	219	0.219	1.398	0	0.995595		134.1	0.1341	1.398	0	0.996579		0.000983976				1.404	0.997452	0.996461		0.997013	0.99873
								1.399	219	0.219	1.399	0	0.995595		135	0.135	1.399	0	0.996579		0.000983976				1.405	0.997456	0.996471		0.997023	0.998735
								1.4	219.3	0.2193	1.4	0	0.995595		135.1	0.1351	1.4	0	0.996579		0.000983976				1.406	0.997461	0.99648		0.997032	0.99874
								1.401	219.4	0.2194	1.401	0	0.995595		135.3	0.1353	1.401	0	0.996579		0.000983976				1.407	0.997466	0.996489		0.997042	0.998745
								1.402	219.5	0.2195	1.402	0	0.995595		135.7	0.1357	1.402	0	0.996579		0.000983976				1.408	0.99747	0.996499		0.997051	0.99875
								1.403	219.6	0.2196	1.403	0	0.995595		135.9	0.1359	1.403	0	0.996579		0.000983976				1.409	0.997475	0.996508		0.997061	0.998755
								1.404	219.7	0.2197	1.404	0	0.995595		136	0.136	1.404	0	0.996579		0.000983976				1.41	0.997479	0.996517		0.99707	0.99876
								1.405	220.2	0.2202	1.405	0	0.995595		136.1	0.1361	1.405	0	0.996579		0.000983976				1.411	0.997484	0.996526		0.99708	0.998765
								1.406	220.2	0.2202	1.406	0	0.995595		136.1	0.1361	1.406	0	0.996579		0.000983976				1.412	0.997488	0.996535		0.997089	0.99877
								1.407	220.4	0.2204	1.407	0	0.995595		136.3	0.1363	1.407	0	0.996579		0.000983976				1.413	0.997493	0.996544		0.997099	0.998775
								1.408	220.4	0.2204	1.408	0	0.995595		136.6	0.1366	1.408	0	0.996579		0.000983976				1.414	0.997497	0.996553		0.997108	0.99878
								1.409	222.2	0.2222	1.409	0	0.995595		136.7	0.1367	1.409	0	0.996579		0.000983976				1.415	0.997502	0.996563		0.997117	0.998784
								1.41	222.3	0.2223	1.41	0	0.995595		136.7	0.1367	1.41	0	0.996579		0.000983976				1.416	0.997506	0.996572		0.997127	0.998789
								1.411	222.5	0.2225	1.411	1	0.996145		136.7	0.1367	1.411	0	0.996579		0.000433316				1.417	0.997511	0.996581		0.997136	0.998794
								1.412	222.5	0.2225	1.412	1	0.996696		136.9	0.1369	1.412	0	0.996579		-0.000117345				1.418	0.997515	0.996589		0.997145	0.998799
								1.413	222.7	0.2227	1.413	0	0.996696		136.9	0.1369	1.413	0	0.996579		-0.000117345				1.419	0.99752	0.996598		0.997155	0.998804
								1.414	222.8	0.2228	1.414	0	0.996696		137.2	0.1372	1.414	0	0.996579		-0.000117345				1.42	0.997524	0.996607		0.997164	0.998808
								1.415	222.9	0.2229	1.415	0	0.996696		137.4	0.1374	1.415	0	0.996579		-0.000117345				1.421	0.997529	0.996616		0.997173	0.998813
								1.416	223.2	0.2232	1.416	0	0.996696		137.6	0.1376	1.416	0	0.996579		-0.000117345				1.422	0.997533	0.996625		0.997182	0.998818
								1.417	223.4	0.2234	1.417	0	0.996696		137.7	0.1377	1.417	0	0.996579		-0.000117345				1.423	0.997537	0.996634		0.997191	0.998823
								1.418	223.7	0.2237	1.418	0	0.996696		138.9	0.1389	1.418	0	0.996579		-0.000117345				1.424	0.997542	0.996643		0.9972	0.998827
								1.419	224.3	0.2243	1.419	0	0.996696		138.9	0.1389	1.419	0	0.996579		-0.000117345				1.425	0.997546	0.996651		0.997209	0.998832
								1.42	224.7	0.2247	1.42	0	0.996696		139	0.139	1.42	0	0.996579		-0.000117345				1.426	0.99755	0.99666		0.997218	0.998837
								1.421	225	0.225	1.421	0	0.996696		139.2	0.1392	1.421	0	0.996579		-0.000117345				1.427	0.997555	0.996669		0.997227	0.998841
								1.422	225.1	0.2251	1.422	0	0.996696		139.3	0.1393	1.422	0	0.996579		-0.000117345				1.428	0.997559	0.996678		0.997236	0.998846
								1.423	225.2	0.2252	1.423	0	0.996696		139.7	0.1397	1.423	0	0.996579		-0.000117345				1.429	0.997563	0.996686		0.997245	0.99885
								1.424	225.3	0.2253	1.424	0	0.996696		139.7	0.1397	1.424	0	0.996579		-0.000117345				1.43	0.997567	0.996695		0.997254	0.998855
								1.425	225.6	0.2256	1.425	0	0.996696		139.7	0.1397	1.425	0	0.996579		-0.000117345				1.431	0.997572	0.996703		0.997263	0.998859
								1.426	225.7	0.2257	1.426	0	0.996696		140.1	0.1401	1.426	0	0.996579		-0.000117345				1.432	0.997576	0.996712		0.997272	0.998864
								1.427	225.7	0.2257	1.427	0	0.996696		140.3	0.1403	1.427	0	0.996579		-0.000117345				1.433	0.99758	0.99672		0.997281	0.998869
								1.428	226.3	0.2263	1.428	0	0.996696		140.6	0.1406	1.428	0	0.996579		-0.000117345				1.434	0.997584	0.996729		0.99729	0.998873
								1.429	226.6	0.2266	1.429	0	0.996696		140.6	0.1406	1.429	0	0.996579		-0.000117345				1.435	0.997588	0.996737		0.997298	0.998878
								1.43	227.1	0.2271	1.43	0	0.996696		141	0.141	1.43	0	0.996579		-0.000117345				1.436	0.997592	0.996746		0.997307	0.998882
								1.431	227.7	0.2277	1.431	0	0.996696		141.3	0.1413	1.431	0	0.996579		-0.000117345				1.437	0.997596	0.996754		0.997316	0.998886
								1.432	227.8	0.2278	1.432	0	0.996696		141.3	0.1413	1.432	0	0.996579		-0.000117345				1.438	0.997601	0.996763		0.997324	0.998891
								1.433	228.2	0.2282	1.433	0	0.996696		141.6	0.1416	1.433	0	0.996579		-0.000117345				1.439	0.997605	0.996771		0.997333	0.998895
								1.434	228.4	0.2284	1.434	0	0.996696		142	0.142	1.434	0	0.996579		-0.000117345				1.44	0.997609	0.996779		0.997342	0.9989
								1.435	228.9	0.2289	1.435	0	0.996696		142.1	0.1421	1.435	0	0.996579		-0.000117345				1.441	0.997613	0.996788		0.99735	0.998904
								1.436	228.9	0.2289	1.436	0	0.996696		142.1	0.1421	1.436	0	0.996579		-0.000117345				1.442	0.997617	0.996796		0.997359	0.998908
								1.437	229	0.229	1.437	0	0.996696		142.1	0.1421	1.437	0	0.996579		-0.000117345				1.443	0.997621	0.996804		0.997367	0.998913
								1.438	229.3	0.2293	1.438	0	0.996696		142.3	0.1423	1.438	0	0.996579		-0.000117345				1.444	0.997625	0.996813		0.997376	0.998917
								1.439	229.4	0.2294	1.439	0	0.996696		142.4	0.1424	1.439	0	0.996579		-0.000117345				1.445	0.997629	0.996821		0.997384	0.998921
								1.44	229.4	0.2294	1.44	0	0.996696		142.8	0.1428	1.44	0	0.996579		-0.000117345				1.446	0.997633	0.996829		0.997393	0.998926
								1.441	229.5	0.2295	1.441	0	0.996696		143	0.143	1.441	0	0.996579		-0.000117345				1.447	0.997637	0.996837		0.997401	0.99893
								1.442	229.6	0.2296	1.442	0	0.996696		143.2	0.1432	1.442	0	0.996579		-0.000117345				1.448	0.997641	0.996845		0.99741	0.998934
								1.443	230.1	0.2301	1.443	0	0.996696		143.3	0.1433	1.443	0	0.996579		-0.000117345				1.449	0.997645	0.996853		0.997418	0.998938
								1.444	230.5	0.2305	1.444	0	0.996696		143.7	0.1437	1.444	0	0.996579		-0.000117345				1.45	0.997648	0.996861		0.997427	0.998943
								1.445	230.8	0.2308	1.445	0	0.996696		143.7	0.1437	1.445	0	0.996579		-0.000117345				1.451	0.997652	0.99687		0.997435	0.998947
								1.446	232.2	0.2322	1.446	0	0.996696		143.7	0.1437	1.446	0	0.996579		-0.000117345				1.452	0.997656	0.996878		0.997443	0.998951
								1.447	233.3	0.2333	1.447	0	0.996696		143.9	0.1439	1.447	0	0.996579		-0.000117345				1.453	0.99766	0.996886		0.997451	0.998955
								1.448	234	0.234	1.448	0	0.996696		143.9	0.1439	1.448	0	0.996579		-0.000117345				1.454	0.997664	0.996894		0.99746	0.998959
								1.449	234	0.234	1.449	0	0.996696		144.1	0.1441	1.449	0	0.996579		-0.000117345				1.455	0.997668	0.996901		0.997468	0.998964
								1.45	234.9	0.2349	1.45	0	0.996696		144.3	0.1443	1.45	0	0.996579		-0.000117345				1.456	0.997672	0.996909		0.997476	0.998968
								1.451	235.1	0.2351	1.451	0	0.996696		144.3	0.1443	1.451	0	0.996579		-0.000117345				1.457	0.997675	0.996917		0.997484	0.998972
								1.452	235.7	0.2357	1.452	0	0.996696		144.3	0.1443	1.452	0	0.996579		-0.000117345				1.458	0.997679	0.996925		0.997492	0.998976
								1.453	236.3	0.2363	1.453	0	0.996696		144.4	0.1444	1.453	0	0.996579		-0.000117345				1.459	0.997683	0.996933		0.9975	0.99898
								1.454	237.7	0.2377	1.454	0	0.996696		144.8	0.1448	1.454	0	0.996579		-0.000117345				1.46	0.997687	0.996941		0.997509	0.998984
								1.455	239.4	0.2394	1.455	0	0.996696		145.5	0.1455	1.455	0	0.996579		-0.000117345				1.461	0.99769	0.996949		0.997517	0.998988
								1.456	241.2	0.2412	1.456	0	0.996696		145.6	0.1456	1.456	0	0.996579		-0.000117345				1.462	0.997694	0.996956		0.997525	0.998992
								1.457	241.6	0.2416	1.457	0	0.996696		145.8	0.1458	1.457	0	0.996579		-0.000117345				1.463	0.997698	0.996964		0.997533	0.998996
								1.458	241.8	0.2418	1.458	0	0.996696		145.9	0.1459	1.458	0	0.996579		-0.000117345				1.464	0.997702	0.996972		0.997541	0.999
								1.459	241.9	0.2419	1.459	0	0.996696		146.4	0.1464	1.459	0	0.996579		-0.000117345				1.465	0.997705	0.99698		0.997549	0.999004
								1.46	242.6	0.2426	1.46	0	0.996696		146.5	0.1465	1.46	0	0.996579		-0.000117345				1.466	0.997709	0.996987		0.997557	0.999008
								1.461	242.9	0.2429	1.461	0	0.996696		146.6	0.1466	1.461	0	0.996579		-0.000117345				1.467	0.997713	0.996995		0.997564	0.999012
								1.462	243.7	0.2437	1.462	0	0.996696		146.6	0.1466	1.462	0	0.996579		-0.000117345				1.468	0.997716	0.997002		0.997572	0.999016
								1.463	243.7	0.2437	1.463	0	0.996696		146.6	0.1466	1.463	0	0.996579		-0.000117345				1.469	0.99772	0.99701		0.99758	0.99902
								1.464	243.9	0.2439	1.464	0	0.996696		146.7	0.1467	1.464	0	0.996579		-0.000117345				1.47	0.997723	0.997018		0.997588	0.999024
								1.465	244	0.244	1.465	0	0.996696		146.9	0.1469	1.465	0	0.996579		-0.000117345				1.471	0.997727	0.997025		0.997596	0.999028
								1.466	244.2	0.2442	1.466	0	0.996696		146.9	0.1469	1.466	0	0.996579		-0.000117345				1.472	0.997731	0.997033		0.997604	0.999031
								1.467	244.3	0.2443	1.467	0	0.996696		147.3	0.1473	1.467	0	0.996579		-0.000117345				1.473	0.997734	0.99704		0.997611	0.999035
								1.468	244.4	0.2444	1.468	0	0.996696		147.3	0.1473	1.468	0	0.996579		-0.000117345				1.474	0.997738	0.997048		0.997619	0.999039
								1.469	244.7	0.2447	1.469	0	0.996696		147.8	0.1478	1.469	0	0.996579		-0.000117345				1.475	0.997741	0.997055		0.997627	0.999043
								1.47	245.6	0.2456	1.47	0	0.996696		148	0.148	1.47	0	0.996579		-0.000117345				1.476	0.997745	0.997063		0.997634	0.999047
								1.471	246	0.246	1.471	0	0.996696		148.3	0.1483	1.471	0	0.996579		-0.000117345				1.477	0.997748	0.99707		0.997642	0.999051
								1.472	246.4	0.2464	1.472	0	0.996696		148.4	0.1484	1.472	0	0.996579		-0.000117345				1.478	0.997752	0.997077		0.99765	0.999054
								1.473	247	0.247	1.473	0	0.996696		148.7	0.1487	1.473	0	0.996579		-0.000117345				1.479	0.997755	0.997085		0.997657	0.999058
								1.474	247.2	0.2472	1.474	0	0.996696		148.7	0.1487	1.474	0	0.996579		-0.000117345				1.48	0.997759	0.997092		0.997665	0.999062
								1.475	247.4	0.2474	1.475	0	0.996696		148.7	0.1487	1.475	0	0.996579		-0.000117345				1.481	0.997762	0.997099		0.997672	0.999066
								1.476	248.2	0.2482	1.476	0	0.996696		149.3	0.1493	1.476	0	0.996579		-0.000117345				1.482	0.997765	0.997107		0.99768	0.999069
								1.477	248.5	0.2485	1.477	0	0.996696		149.3	0.1493	1.477	0	0.996579		-0.000117345				1.483	0.997769	0.997114		0.997687	0.999073
								1.478	249.9	0.2499	1.478	0	0.996696		149.6	0.1496	1.478	0	0.996579		-0.000117345				1.484	0.997772	0.997121		0.997695	0.999077
								1.479	250.3	0.2503	1.479	0	0.996696		150	0.15	1.479	0	0.996579		-0.000117345				1.485	0.997776	0.997128		0.997702	0.99908
								1.48	250.4	0.2504	1.48	0	0.996696		150.3	0.1503	1.48	0	0.996579		-0.000117345				1.486	0.997779	0.997135		0.99771	0.999084
								1.481	250.8	0.2508	1.481	0	0.996696		150.3	0.1503	1.481	0	0.996579		-0.000117345				1.487	0.997782	0.997143		0.997717	0.999088
								1.482	251.3	0.2513	1.482	0	0.996696		150.5	0.1505	1.482	0	0.996579		-0.000117345				1.488	0.997786	0.99715		0.997725	0.999091
								1.483	251.5	0.2515	1.483	1	0.997247		150.6	0.1506	1.483	0	0.996579		-0.000668006				1.489	0.997789	0.997157		0.997732	0.999095
								1.484	251.5	0.2515	1.484	0	0.997247		150.6	0.1506	1.484	0	0.996579		-0.000668006				1.49	0.997792	0.997164		0.997739	0.999099
								1.485	251.8	0.2518	1.485	0	0.997247		150.7	0.1507	1.485	0	0.996579		-0.000668006				1.491	0.997796	0.997171		0.997747	0.999102
								1.486	252.4	0.2524	1.486	0	0.997247		150.8	0.1508	1.486	0	0.996579		-0.000668006				1.492	0.997799	0.997178		0.997754	0.999106
								1.487	252.5	0.2525	1.487	0	0.997247		151	0.151	1.487	0	0.996579		-0.000668006				1.493	0.997802	0.997185		0.997761	0.999109
								1.488	252.8	0.2528	1.488	0	0.997247		151.3	0.1513	1.488	0	0.996579		-0.000668006				1.494	0.997806	0.997192		0.997768	0.999113
								1.489	253.1	0.2531	1.489	0	0.997247		151.4	0.1514	1.489	0	0.996579		-0.000668006				1.495	0.997809	0.997199		0.997776	0.999116
								1.49	254.3	0.2543	1.49	0	0.997247		152.6	0.1526	1.49	0	0.996579		-0.000668006				1.496	0.997812	0.997206		0.997783	0.99912
								1.491	254.9	0.2549	1.491	0	0.997247		152.8	0.1528	1.491	0	0.996579		-0.000668006				1.497	0.997815	0.997213		0.99779	0.999123
								1.492	255	0.255	1.492	0	0.997247		153.3	0.1533	1.492	0	0.996579		-0.000668006				1.498	0.997819	0.99722		0.997797	0.999127
								1.493	256.5	0.2565	1.493	0	0.997247		153.3	0.1533	1.493	0	0.996579		-0.000668006				1.499	0.997822	0.997227		0.997804	0.99913
								1.494	256.6	0.2566	1.494	0	0.997247		154.6	0.1546	1.494	0	0.996579		-0.000668006				1.5	0.997825	0.997234		0.997811	0.999134
								1.495	257	0.257	1.495	1	0.997797		154.6	0.1546	1.495	0	0.996579		-0.00121867				1.501	0.997828	0.997241		0.997819	0.999137
								1.496	257.4	0.2574	1.496	0	0.997797		155.1	0.1551	1.496	0	0.996579		-0.00121867				1.502	0.997831	0.997247		0.997826	0.999141
								1.497	257.5	0.2575	1.497	0	0.997797		155.2	0.1552	1.497	0	0.996579		-0.00121867				1.503	0.997834	0.997254		0.997833	0.999144
								1.498	257.5	0.2575	1.498	0	0.997797		155.2	0.1552	1.498	0	0.996579		-0.00121867				1.504	0.997838	0.997261		0.99784	0.999147
								1.499	257.6	0.2576	1.499	0	0.997797		155.6	0.1556	1.499	0	0.996579		-0.00121867				1.505	0.997841	0.997268		0.997847	0.999151
								1.5	258.2	0.2582	1.5	0	0.997797		155.8	0.1558	1.5	0	0.996579		-0.00121867				1.506	0.997844	0.997274		0.997854	0.999154
								1.501	261.1	0.2611	1.501	0	0.997797		156	0.156	1.501	0	0.996579		-0.00121867				1.507	0.997847	0.997281		0.997861	0.999158
								1.502	262.3	0.2623	1.502	0	0.997797		156.7	0.1567	1.502	0	0.996579		-0.00121867				1.508	0.99785	0.997288		0.997867	0.999161
								1.503	262.3	0.2623	1.503	0	0.997797		157.3	0.1573	1.503	0	0.996579		-0.00121867				1.509	0.997853	0.997295		0.997874	0.999164
								1.504	262.8	0.2628	1.504	0	0.997797		157.4	0.1574	1.504	0	0.996579		-0.00121867				1.51	0.997856	0.997301		0.997881	0.999168
								1.505	263	0.263	1.505	0	0.997797		157.7	0.1577	1.505	0	0.996579		-0.00121867				1.511	0.997859	0.997308		0.997888	0.999171
								1.506	263.2	0.2632	1.506	0	0.997797		157.7	0.1577	1.506	0	0.996579		-0.00121867				1.512	0.997862	0.997314		0.997895	0.999174
								1.507	263.6	0.2636	1.507	0	0.997797		157.7	0.1577	1.507	0	0.996579		-0.00121867				1.513	0.997865	0.997321		0.997902	0.999178
								1.508	264.2	0.2642	1.508	0	0.997797		157.8	0.1578	1.508	0	0.996579		-0.00121867				1.514	0.997868	0.997328		0.997908	0.999181
								1.509	265.1	0.2651	1.509	0	0.997797		158	0.158	1.509	0	0.996579		-0.00121867				1.515	0.997871	0.997334		0.997915	0.999184
								1.51	265.4	0.2654	1.51	0	0.997797		158.7	0.1587	1.51	0	0.996579		-0.00121867				1.516	0.997874	0.997341		0.997922	0.999187
								1.511	265.8	0.2658	1.511	0	0.997797		158.8	0.1588	1.511	0	0.996579		-0.00121867				1.517	0.997877	0.997347		0.997929	0.999191
								1.512	266.2	0.2662	1.512	0	0.997797		159.1	0.1591	1.512	0	0.996579		-0.00121867				1.518	0.99788	0.997354		0.997935	0.999194
								1.513	267.7	0.2677	1.513	0	0.997797		159.4	0.1594	1.513	0	0.996579		-0.00121867				1.519	0.997883	0.99736		0.997942	0.999197
								1.514	268.4	0.2684	1.514	0	0.997797		160.1	0.1601	1.514	0	0.996579		-0.00121867				1.52	0.997886	0.997366		0.997949	0.9992
								1.515	268.7	0.2687	1.515	0	0.997797		161	0.161	1.515	0	0.996579		-0.00121867				1.521	0.997889	0.997373		0.997955	0.999203
								1.516	269	0.269	1.516	0	0.997797		161.2	0.1612	1.516	0	0.996579		-0.00121867				1.522	0.997892	0.997379		0.997962	0.999207
								1.517	269.1	0.2691	1.517	0	0.997797		161.5	0.1615	1.517	0	0.996579		-0.00121867				1.523	0.997895	0.997386		0.997969	0.99921
								1.518	269.4	0.2694	1.518	0	0.997797		161.8	0.1618	1.518	0	0.996579		-0.00121867				1.524	0.997898	0.997392		0.997975	0.999213
								1.519	269.9	0.2699	1.519	0	0.997797		161.8	0.1618	1.519	0	0.996579		-0.00121867				1.525	0.997901	0.997398		0.997982	0.999216
								1.52	271.1	0.2711	1.52	0	0.997797		162.7	0.1627	1.52	0	0.996579		-0.00121867				1.526	0.997904	0.997405		0.997988	0.999219
								1.521	272.7	0.2727	1.521	0	0.997797		163.5	0.1635	1.521	0	0.996579		-0.00121867				1.527	0.997907	0.997411		0.997995	0.999222
								1.522	272.9	0.2729	1.522	0	0.997797		163.9	0.1639	1.522	0	0.996579		-0.00121867				1.528	0.997909	0.997417		0.998001	0.999225
								1.523	274.3	0.2743	1.523	0	0.997797		163.9	0.1639	1.523	0	0.996579		-0.00121867				1.529	0.997912	0.997423		0.998008	0.999228
								1.524	274.3	0.2743	1.524	0	0.997797		164.2	0.1642	1.524	0	0.996579		-0.00121867				1.53	0.997915	0.99743		0.998014	0.999231
								1.525	275.1	0.2751	1.525	0	0.997797		164.6	0.1646	1.525	0	0.996579		-0.00121867				1.531	0.997918	0.997436		0.998021	0.999234
								1.526	275.6	0.2756	1.526	0	0.997797		164.7	0.1647	1.526	1	0.997067		-0.000729908				1.532	0.997921	0.997442		0.998027	0.999238
								1.527	276.2	0.2762	1.527	0	0.997797		165	0.165	1.527	0	0.997067		-0.000729908				1.533	0.997923	0.997448		0.998033	0.999241
								1.528	276.8	0.2768	1.528	0	0.997797		165	0.165	1.528	0	0.997067		-0.000729908				1.534	0.997926	0.997454		0.99804	0.999244
								1.529	277.4	0.2774	1.529	0	0.997797		165.4	0.1654	1.529	0	0.997067		-0.000729908				1.535	0.997929	0.997461		0.998046	0.999247
								1.53	278.9	0.2789	1.53	0	0.997797		165.6	0.1656	1.53	0	0.997067		-0.000729908				1.536	0.997932	0.997467		0.998052	0.99925
								1.531	279	0.279	1.531	0	0.997797		165.9	0.1659	1.531	0	0.997067		-0.000729908				1.537	0.997935	0.997473		0.998059	0.999253
								1.532	279.6	0.2796	1.532	0	0.997797		166.6	0.1666	1.532	0	0.997067		-0.000729908				1.538	0.997937	0.997479		0.998065	0.999256
								1.533	279.9	0.2799	1.533	0	0.997797		167.3	0.1673	1.533	0	0.997067		-0.000729908				1.539	0.99794	0.997485		0.998071	0.999259
								1.534	279.9	0.2799	1.534	0	0.997797		167.3	0.1673	1.534	0	0.997067		-0.000729908				1.54	0.997943	0.997491		0.998077	0.999261
								1.535	280.5	0.2805	1.535	0	0.997797		167.4	0.1674	1.535	0	0.997067		-0.000729908				1.541	0.997945	0.997497		0.998084	0.999264
								1.536	282.4	0.2824	1.536	0	0.997797		167.4	0.1674	1.536	0	0.997067		-0.000729908				1.542	0.997948	0.997503		0.99809	0.999267
								1.537	283.9	0.2839	1.537	0	0.997797		167.7	0.1677	1.537	0	0.997067		-0.000729908				1.543	0.997951	0.997509		0.998096	0.99927
								1.538	284.3	0.2843	1.538	0	0.997797		168.3	0.1683	1.538	0	0.997067		-0.000729908				1.544	0.997954	0.997515		0.998102	0.999273
								1.539	284.4	0.2844	1.539	0	0.997797		168.5	0.1685	1.539	0	0.997067		-0.000729908				1.545	0.997956	0.997521		0.998108	0.999276
								1.54	288.9	0.2889	1.54	0	0.997797		168.5	0.1685	1.54	0	0.997067		-0.000729908				1.546	0.997959	0.997527		0.998114	0.999279
								1.541	291.2	0.2912	1.541	0	0.997797		169	0.169	1.541	1	0.997556		-0.00024115				1.547	0.997961	0.997533		0.998121	0.999282
								1.542	291.4	0.2914	1.542	0	0.997797		169.3	0.1693	1.542	0	0.997556		-0.00024115				1.548	0.997964	0.997539		0.998127	0.999285
								1.543	291.4	0.2914	1.543	0	0.997797		170.6	0.1706	1.543	0	0.997556		-0.00024115				1.549	0.997967	0.997544		0.998133	0.999287
								1.544	291.5	0.2915	1.544	0	0.997797		170.6	0.1706	1.544	0	0.997556		-0.00024115				1.55	0.997969	0.99755		0.998139	0.99929
								1.545	291.7	0.2917	1.545	0	0.997797		171.2	0.1712	1.545	0	0.997556		-0.00024115				1.551	0.997972	0.997556		0.998145	0.999293
								1.546	291.8	0.2918	1.546	0	0.997797		172.1	0.1721	1.546	0	0.997556		-0.00024115				1.552	0.997975	0.997562		0.998151	0.999296
								1.547	292.6	0.2926	1.547	0	0.997797		172.7	0.1727	1.547	0	0.997556		-0.00024115				1.553	0.997977	0.997568		0.998157	0.999299
								1.548	293	0.293	1.548	0	0.997797		172.8	0.1728	1.548	0	0.997556		-0.00024115				1.554	0.99798	0.997573		0.998163	0.999302
								1.549	294.9	0.2949	1.549	0	0.997797		172.9	0.1729	1.549	0	0.997556		-0.00024115				1.555	0.997982	0.997579		0.998169	0.999304
								1.55	296	0.296	1.55	0	0.997797		173.2	0.1732	1.55	0	0.997556		-0.00024115				1.556	0.997985	0.997585		0.998175	0.999307
								1.551	296.4	0.2964	1.551	0	0.997797		173.3	0.1733	1.551	0	0.997556		-0.00024115				1.557	0.997987	0.997591		0.99818	0.99931
								1.552	296.7	0.2967	1.552	0	0.997797		173.3	0.1733	1.552	0	0.997556		-0.00024115				1.558	0.99799	0.997596		0.998186	0.999313
								1.553	296.8	0.2968	1.553	0	0.997797		173.5	0.1735	1.553	0	0.997556		-0.00024115				1.559	0.997992	0.997602		0.998192	0.999315
								1.554	296.9	0.2969	1.554	0	0.997797		173.9	0.1739	1.554	0	0.997556		-0.00024115				1.56	0.997995	0.997608		0.998198	0.999318
								1.555	298.6	0.2986	1.555	0	0.997797		173.9	0.1739	1.555	0	0.997556		-0.00024115				1.561	0.997997	0.997613		0.998204	0.999321
								1.556	299.4	0.2994	1.556	0	0.997797		174.3	0.1743	1.556	0	0.997556		-0.00024115				1.562	0.998	0.997619		0.99821	0.999323
								1.557	299.6	0.2996	1.557	0	0.997797		174.7	0.1747	1.557	0	0.997556		-0.00024115				1.563	0.998002	0.997624		0.998216	0.999326
								1.558	299.8	0.2998	1.558	0	0.997797		174.8	0.1748	1.558	0	0.997556		-0.00024115				1.564	0.998005	0.99763		0.998221	0.999329
								1.559	299.9	0.2999	1.559	0	0.997797		174.8	0.1748	1.559	0	0.997556		-0.00024115				1.565	0.998007	0.997636		0.998227	0.999332
								1.56	301.1	0.3011	1.56	0	0.997797		175.9	0.1759	1.56	0	0.997556		-0.00024115				1.566	0.99801	0.997641		0.998233	0.999334
								1.561	301.8	0.3018	1.561	0	0.997797		176.2	0.1762	1.561	0	0.997556		-0.00024115				1.567	0.998012	0.997647		0.998239	0.999337
								1.562	303.2	0.3032	1.562	0	0.997797		177.3	0.1773	1.562	0	0.997556		-0.00024115				1.568	0.998015	0.997652		0.998244	0.999339
								1.563	304	0.304	1.563	0	0.997797		177.5	0.1775	1.563	0	0.997556		-0.00024115				1.569	0.998017	0.997658		0.99825	0.999342
								1.564	304.5	0.3045	1.564	0	0.997797		178.5	0.1785	1.564	0	0.997556		-0.00024115				1.57	0.998019	0.997663		0.998256	0.999345
								1.565	304.7	0.3047	1.565	0	0.997797		178.7	0.1787	1.565	0	0.997556		-0.00024115				1.571	0.998022	0.997669		0.998261	0.999347
								1.566	306	0.306	1.566	0	0.997797		179	0.179	1.566	0	0.997556		-0.00024115				1.572	0.998024	0.997674		0.998267	0.99935
								1.567	306.1	0.3061	1.567	0	0.997797		179.3	0.1793	1.567	0	0.997556		-0.00024115				1.573	0.998027	0.997679		0.998272	0.999353
								1.568	306.3	0.3063	1.568	0	0.997797		179.4	0.1794	1.568	0	0.997556		-0.00024115				1.574	0.998029	0.997685		0.998278	0.999355
								1.569	307	0.307	1.569	0	0.997797		179.4	0.1794	1.569	0	0.997556		-0.00024115				1.575	0.998031	0.99769		0.998284	0.999358
								1.57	307.1	0.3071	1.57	0	0.997797		179.6	0.1796	1.57	0	0.997556		-0.00024115				1.576	0.998034	0.997696		0.998289	0.99936
								1.571	307.2	0.3072	1.571	0	0.997797		179.8	0.1798	1.571	0	0.997556		-0.00024115				1.577	0.998036	0.997701		0.998295	0.999363
								1.572	307.3	0.3073	1.572	0	0.997797		179.8	0.1798	1.572	0	0.997556		-0.00024115				1.578	0.998038	0.997706		0.9983	0.999365
								1.573	308.3	0.3083	1.573	0	0.997797		179.8	0.1798	1.573	0	0.997556		-0.00024115				1.579	0.998041	0.997712		0.998306	0.999368
								1.574	309.2	0.3092	1.574	0	0.997797		180.4	0.1804	1.574	0	0.997556		-0.00024115				1.58	0.998043	0.997717		0.998311	0.99937
								1.575	309.5	0.3095	1.575	0	0.997797		180.6	0.1806	1.575	0	0.997556		-0.00024115				1.581	0.998045	0.997722		0.998317	0.999373
								1.576	310.2	0.3102	1.576	0	0.997797		180.8	0.1808	1.576	0	0.997556		-0.00024115				1.582	0.998048	0.997727		0.998322	0.999375
								1.577	310.6	0.3106	1.577	0	0.997797		180.9	0.1809	1.577	0	0.997556		-0.00024115				1.583	0.99805	0.997733		0.998327	0.999378
								1.578	310.9	0.3109	1.578	0	0.997797		181.4	0.1814	1.578	0	0.997556		-0.00024115				1.584	0.998052	0.997738		0.998333	0.99938
								1.579	311.5	0.3115	1.579	0	0.997797		181.7	0.1817	1.579	0	0.997556		-0.00024115				1.585	0.998054	0.997743		0.998338	0.999383
								1.58	312.3	0.3123	1.58	0	0.997797		183.1	0.1831	1.58	0	0.997556		-0.00024115				1.586	0.998057	0.997748		0.998344	0.999385
								1.581	312.5	0.3125	1.581	0	0.997797		183.5	0.1835	1.581	0	0.997556		-0.00024115				1.587	0.998059	0.997754		0.998349	0.999388
								1.582	313.4	0.3134	1.582	0	0.997797		183.6	0.1836	1.582	0	0.997556		-0.00024115				1.588	0.998061	0.997759		0.998354	0.99939
								1.583	314.2	0.3142	1.583	0	0.997797		183.6	0.1836	1.583	0	0.997556		-0.00024115				1.589	0.998063	0.997764		0.99836	0.999393
								1.584	315.7	0.3157	1.584	0	0.997797		183.9	0.1839	1.584	0	0.997556		-0.00024115				1.59	0.998066	0.997769		0.998365	0.999395
								1.585	317.1	0.3171	1.585	0	0.997797		184.2	0.1842	1.585	0	0.997556		-0.00024115				1.591	0.998068	0.997774		0.99837	0.999397
								1.586	317.5	0.3175	1.586	0	0.997797		184.4	0.1844	1.586	0	0.997556		-0.00024115				1.592	0.99807	0.997779		0.998376	0.9994
								1.587	317.6	0.3176	1.587	0	0.997797		184.9	0.1849	1.587	0	0.997556		-0.00024115				1.593	0.998072	0.997784		0.998381	0.999402
								1.588	317.9	0.3179	1.588	0	0.997797		185.1	0.1851	1.588	0	0.997556		-0.00024115				1.594	0.998074	0.997789		0.998386	0.999405
								1.589	318.7	0.3187	1.589	0	0.997797		185.4	0.1854	1.589	0	0.997556		-0.00024115				1.595	0.998077	0.997794		0.998391	0.999407
								1.59	319.5	0.3195	1.59	0	0.997797		186.3	0.1863	1.59	0	0.997556		-0.00024115				1.596	0.998079	0.997799		0.998396	0.999409
								1.591	321.5	0.3215	1.591	0	0.997797		186.5	0.1865	1.591	0	0.997556		-0.00024115				1.597	0.998081	0.997804		0.998402	0.999412
								1.592	322.3	0.3223	1.592	0	0.997797		186.8	0.1868	1.592	0	0.997556		-0.00024115				1.598	0.998083	0.997809		0.998407	0.999414
								1.593	322.4	0.3224	1.593	0	0.997797		186.8	0.1868	1.593	0	0.997556		-0.00024115				1.599	0.998085	0.997814		0.998412	0.999416
								1.594	322.7	0.3227	1.594	0	0.997797		187	0.187	1.594	0	0.997556		-0.00024115				1.6	0.998087	0.997819		0.998417	0.999419
								1.595	323.2	0.3232	1.595	0	0.997797		187.2	0.1872	1.595	0	0.997556		-0.00024115				1.601	0.99809	0.997824		0.998422	0.999421
								1.596	326.2	0.3262	1.596	0	0.997797		187.2	0.1872	1.596	0	0.997556		-0.00024115				1.602	0.998092	0.997829		0.998427	0.999423
								1.597	326.3	0.3263	1.597	0	0.997797		188	0.188	1.597	0	0.997556		-0.00024115				1.603	0.998094	0.997834		0.998432	0.999425
								1.598	326.8	0.3268	1.598	0	0.997797		188.2	0.1882	1.598	0	0.997556		-0.00024115				1.604	0.998096	0.997839		0.998438	0.999428
								1.599	327.7	0.3277	1.599	0	0.997797		188.4	0.1884	1.599	0	0.997556		-0.00024115				1.605	0.998098	0.997844		0.998443	0.99943
								1.6	328.6	0.3286	1.6	0	0.997797		188.4	0.1884	1.6	0	0.997556		-0.00024115				1.606	0.9981	0.997849		0.998448	0.999432
								1.601	328.9	0.3289	1.601	0	0.997797		188.6	0.1886	1.601	0	0.997556		-0.00024115				1.607	0.998102	0.997854		0.998453	0.999435
								1.602	329	0.329	1.602	0	0.997797		188.9	0.1889	1.602	0	0.997556		-0.00024115				1.608	0.998104	0.997858		0.998458	0.999437
								1.603	331.5	0.3315	1.603	0	0.997797		189.2	0.1892	1.603	0	0.997556		-0.00024115				1.609	0.998106	0.997863		0.998463	0.999439
								1.604	331.6	0.3316	1.604	0	0.997797		189.9	0.1899	1.604	0	0.997556		-0.00024115				1.61	0.998108	0.997868		0.998468	0.999441
								1.605	331.9	0.3319	1.605	0	0.997797		190.5	0.1905	1.605	0	0.997556		-0.00024115				1.611	0.99811	0.997873		0.998473	0.999444
								1.606	332.1	0.3321	1.606	0	0.997797		192	0.192	1.606	0	0.997556		-0.00024115				1.612	0.998112	0.997878		0.998477	0.999446
								1.607	334.3	0.3343	1.607	0	0.997797		192.6	0.1926	1.607	0	0.997556		-0.00024115				1.613	0.998114	0.997882		0.998482	0.999448
								1.608	336.7	0.3367	1.608	0	0.997797		192.8	0.1928	1.608	0	0.997556		-0.00024115				1.614	0.998116	0.997887		0.998487	0.99945
								1.609	336.9	0.3369	1.609	0	0.997797		193.2	0.1932	1.609	0	0.997556		-0.00024115				1.615	0.998118	0.997892		0.998492	0.999452
								1.61	338.7	0.3387	1.61	0	0.997797		193.3	0.1933	1.61	0	0.997556		-0.00024115				1.616	0.99812	0.997897		0.998497	0.999455
								1.611	341.5	0.3415	1.611	0	0.997797		193.7	0.1937	1.611	0	0.997556		-0.00024115				1.617	0.998122	0.997901		0.998502	0.999457
								1.612	341.8	0.3418	1.612	0	0.997797		193.8	0.1938	1.612	0	0.997556		-0.00024115				1.618	0.998124	0.997906		0.998507	0.999459
								1.613	342.4	0.3424	1.613	0	0.997797		193.9	0.1939	1.613	0	0.997556		-0.00024115				1.619	0.998126	0.997911		0.998512	0.999461
								1.614	343.3	0.3433	1.614	0	0.997797		194.3	0.1943	1.614	0	0.997556		-0.00024115				1.62	0.998128	0.997915		0.998516	0.999463
								1.615	343.4	0.3434	1.615	0	0.997797		194.5	0.1945	1.615	0	0.997556		-0.00024115				1.621	0.99813	0.99792		0.998521	0.999465
								1.616	344.9	0.3449	1.616	0	0.997797		194.5	0.1945	1.616	0	0.997556		-0.00024115				1.622	0.998132	0.997925		0.998526	0.999467
								1.617	345.2	0.3452	1.617	0	0.997797		195.3	0.1953	1.617	0	0.997556		-0.00024115				1.623	0.998134	0.997929		0.998531	0.99947
								1.618	345.7	0.3457	1.618	0	0.997797		197.4	0.1974	1.618	0	0.997556		-0.00024115				1.624	0.998136	0.997934		0.998536	0.999472
								1.619	349.2	0.3492	1.619	0	0.997797		198.1	0.1981	1.619	0	0.997556		-0.00024115				1.625	0.998138	0.997938		0.99854	0.999474
								1.62	349.8	0.3498	1.62	0	0.997797		198.6	0.1986	1.62	0	0.997556		-0.00024115				1.626	0.99814	0.997943		0.998545	0.999476
								1.621	350	0.35	1.621	0	0.997797		199.1	0.1991	1.621	0	0.997556		-0.00024115				1.627	0.998142	0.997948		0.99855	0.999478
								1.622	350.6	0.3506	1.622	0	0.997797		199.2	0.1992	1.622	0	0.997556		-0.00024115				1.628	0.998144	0.997952		0.998554	0.99948
								1.623	350.7	0.3507	1.623	0	0.997797		199.8	0.1998	1.623	0	0.997556		-0.00024115				1.629	0.998146	0.997957		0.998559	0.999482
								1.624	351.9	0.3519	1.624	0	0.997797		199.9	0.1999	1.624	0	0.997556		-0.00024115				1.63	0.998148	0.997961		0.998564	0.999484
								1.625	354	0.354	1.625	0	0.997797		200.3	0.2003	1.625	0	0.997556		-0.00024115				1.631	0.99815	0.997966		0.998568	0.999486
								1.626	354.8	0.3548	1.626	0	0.997797		200.5	0.2005	1.626	0	0.997556		-0.00024115				1.632	0.998151	0.99797		0.998573	0.999488
								1.627	354.9	0.3549	1.627	0	0.997797		200.6	0.2006	1.627	0	0.997556		-0.00024115				1.633	0.998153	0.997975		0.998578	0.99949
								1.628	355.1	0.3551	1.628	0	0.997797		200.7	0.2007	1.628	0	0.997556		-0.00024115				1.634	0.998155	0.997979		0.998582	0.999492
								1.629	355.7	0.3557	1.629	0	0.997797		200.7	0.2007	1.629	0	0.997556		-0.00024115				1.635	0.998157	0.997983		0.998587	0.999494
								1.63	360.2	0.3602	1.63	0	0.997797		200.8	0.2008	1.63	0	0.997556		-0.00024115				1.636	0.998159	0.997988		0.998591	0.999496
								1.631	360.7	0.3607	1.631	0	0.997797		203.1	0.2031	1.631	0	0.997556		-0.00024115				1.637	0.998161	0.997992		0.998596	0.999498
								1.632	360.9	0.3609	1.632	0	0.997797		203.2	0.2032	1.632	0	0.997556		-0.00024115				1.638	0.998163	0.997997		0.9986	0.9995
								1.633	361.3	0.3613	1.633	0	0.997797		203.3	0.2033	1.633	0	0.997556		-0.00024115				1.639	0.998164	0.998001		0.998605	0.999502
								1.634	361.8	0.3618	1.634	0	0.997797		204.1	0.2041	1.634	0	0.997556		-0.00024115				1.64	0.998166	0.998005		0.99861	0.999504
								1.635	364.8	0.3648	1.635	0	0.997797		204.7	0.2047	1.635	0	0.997556		-0.00024115				1.641	0.998168	0.99801		0.998614	0.999506
								1.636	366.1	0.3661	1.636	0	0.997797		204.7	0.2047	1.636	0	0.997556		-0.00024115				1.642	0.99817	0.998014		0.998619	0.999508
								1.637	367.2	0.3672	1.637	0	0.997797		205.7	0.2057	1.637	0	0.997556		-0.00024115				1.643	0.998172	0.998018		0.998623	0.99951
								1.638	368.7	0.3687	1.638	0	0.997797		205.9	0.2059	1.638	0	0.997556		-0.00024115				1.644	0.998173	0.998023		0.998627	0.999512
								1.639	369.3	0.3693	1.639	0	0.997797		206	0.206	1.639	0	0.997556		-0.00024115				1.645	0.998175	0.998027		0.998632	0.999514
								1.64	369.3	0.3693	1.64	0	0.997797		206.5	0.2065	1.64	0	0.997556		-0.00024115				1.646	0.998177	0.998031		0.998636	0.999516
								1.641	369.8	0.3698	1.641	0	0.997797		206.6	0.2066	1.641	0	0.997556		-0.00024115				1.647	0.998179	0.998035		0.998641	0.999518
								1.642	369.9	0.3699	1.642	0	0.997797		206.7	0.2067	1.642	0	0.997556		-0.00024115				1.648	0.998181	0.99804		0.998645	0.99952
								1.643	370.6	0.3706	1.643	0	0.997797		207.1	0.2071	1.643	0	0.997556		-0.00024115				1.649	0.998182	0.998044		0.998649	0.999522
								1.644	371.8	0.3718	1.644	0	0.997797		207.2	0.2072	1.644	0	0.997556		-0.00024115				1.65	0.998184	0.998048		0.998654	0.999524
								1.645	372.1	0.3721	1.645	0	0.997797		207.4	0.2074	1.645	0	0.997556		-0.00024115				1.651	0.998186	0.998052		0.998658	0.999526
								1.646	372.6	0.3726	1.646	0	0.997797		207.6	0.2076	1.646	0	0.997556		-0.00024115				1.652	0.998187	0.998057		0.998663	0.999527
								1.647	373.9	0.3739	1.647	0	0.997797		208	0.208	1.647	0	0.997556		-0.00024115				1.653	0.998189	0.998061		0.998667	0.999529
								1.648	375.3	0.3753	1.648	0	0.997797		208.1	0.2081	1.648	0	0.997556		-0.00024115				1.654	0.998191	0.998065		0.998671	0.999531
								1.649	377.2	0.3772	1.649	0	0.997797		208.3	0.2083	1.649	0	0.997556		-0.00024115				1.655	0.998193	0.998069		0.998675	0.999533
								1.65	377.9	0.3779	1.65	0	0.997797		208.5	0.2085	1.65	0	0.997556		-0.00024115				1.656	0.998194	0.998073		0.99868	0.999535
								1.651	377.9	0.3779	1.651	0	0.997797		208.6	0.2086	1.651	0	0.997556		-0.00024115				1.657	0.998196	0.998077		0.998684	0.999537
								1.652	382	0.382	1.652	0	0.997797		208.8	0.2088	1.652	0	0.997556		-0.00024115				1.658	0.998198	0.998081		0.998688	0.999539
								1.653	384.4	0.3844	1.653	0	0.997797		209.7	0.2097	1.653	0	0.997556		-0.00024115				1.659	0.998199	0.998086		0.998693	0.99954
								1.654	384.5	0.3845	1.654	0	0.997797		209.8	0.2098	1.654	0	0.997556		-0.00024115				1.66	0.998201	0.99809		0.998697	0.999542
								1.655	385.2	0.3852	1.655	0	0.997797		209.9	0.2099	1.655	0	0.997556		-0.00024115				1.661	0.998203	0.998094		0.998701	0.999544
								1.656	387.2	0.3872	1.656	0	0.997797		209.9	0.2099	1.656	0	0.997556		-0.00024115				1.662	0.998204	0.998098		0.998705	0.999546
								1.657	387.4	0.3874	1.657	0	0.997797		210.5	0.2105	1.657	0	0.997556		-0.00024115				1.663	0.998206	0.998102		0.998709	0.999548
								1.658	390.1	0.3901	1.658	0	0.997797		211.3	0.2113	1.658	0	0.997556		-0.00024115				1.664	0.998208	0.998106		0.998714	0.99955
								1.659	390.1	0.3901	1.659	0	0.997797		212.7	0.2127	1.659	0	0.997556		-0.00024115				1.665	0.998209	0.99811		0.998718	0.999551
								1.66	390.2	0.3902	1.66	0	0.997797		213.2	0.2132	1.66	0	0.997556		-0.00024115				1.666	0.998211	0.998114		0.998722	0.999553
								1.661	390.3	0.3903	1.661	0	0.997797		214	0.214	1.661	0	0.997556		-0.00024115				1.667	0.998213	0.998118		0.998726	0.999555
								1.662	391.8	0.3918	1.662	0	0.997797		214.1	0.2141	1.662	0	0.997556		-0.00024115				1.668	0.998214	0.998122		0.99873	0.999557
								1.663	395	0.395	1.663	0	0.997797		214.3	0.2143	1.663	0	0.997556		-0.00024115				1.669	0.998216	0.998126		0.998734	0.999558
								1.664	395.1	0.3951	1.664	0	0.997797		214.5	0.2145	1.664	0	0.997556		-0.00024115				1.67	0.998218	0.99813		0.998738	0.99956
								1.665	395.5	0.3955	1.665	0	0.997797		216.6	0.2166	1.665	0	0.997556		-0.00024115				1.671	0.998219	0.998134		0.998742	0.999562
								1.666	397.9	0.3979	1.666	0	0.997797		218	0.218	1.666	0	0.997556		-0.00024115				1.672	0.998221	0.998138		0.998746	0.999564
								1.667	398.1	0.3981	1.667	0	0.997797		218.1	0.2181	1.667	0	0.997556		-0.00024115				1.673	0.998222	0.998142		0.998751	0.999565
								1.668	399.8	0.3998	1.668	0	0.997797		218.3	0.2183	1.668	0	0.997556		-0.00024115				1.674	0.998224	0.998146		0.998755	0.999567
								1.669	400	0.4	1.669	0	0.997797		218.4	0.2184	1.669	0	0.997556		-0.00024115				1.675	0.998225	0.998149		0.998759	0.999569
								1.67	402.3	0.4023	1.67	0	0.997797		218.7	0.2187	1.67	0	0.997556		-0.00024115				1.676	0.998227	0.998153		0.998763	0.999571
								1.671	409.3	0.4093	1.671	0	0.997797		218.7	0.2187	1.671	0	0.997556		-0.00024115				1.677	0.998229	0.998157		0.998767	0.999572
								1.672	411.3	0.4113	1.672	0	0.997797		219.3	0.2193	1.672	0	0.997556		-0.00024115				1.678	0.99823	0.998161		0.998771	0.999574
								1.673	411.9	0.4119	1.673	0	0.997797		219.4	0.2194	1.673	0	0.997556		-0.00024115				1.679	0.998232	0.998165		0.998775	0.999576
								1.674	412	0.412	1.674	0	0.997797		219.6	0.2196	1.674	0	0.997556		-0.00024115				1.68	0.998233	0.998169		0.998779	0.999577
								1.675	412.2	0.4122	1.675	0	0.997797		220.3	0.2203	1.675	0	0.997556		-0.00024115				1.681	0.998235	0.998173		0.998782	0.999579
								1.676	413	0.413	1.676	0	0.997797		220.6	0.2206	1.676	0	0.997556		-0.00024115				1.682	0.998236	0.998176		0.998786	0.999581
								1.677	414	0.414	1.677	0	0.997797		220.6	0.2206	1.677	0	0.997556		-0.00024115				1.683	0.998238	0.99818		0.99879	0.999582
								1.678	415.4	0.4154	1.678	0	0.997797		222.4	0.2224	1.678	0	0.997556		-0.00024115				1.684	0.998239	0.998184		0.998794	0.999584
								1.679	417.6	0.4176	1.679	0	0.997797		222.6	0.2226	1.679	0	0.997556		-0.00024115				1.685	0.998241	0.998188		0.998798	0.999586
								1.68	419.3	0.4193	1.68	0	0.997797		223.5	0.2235	1.68	0	0.997556		-0.00024115				1.686	0.998242	0.998191		0.998802	0.999587
								1.681	422	0.422	1.681	0	0.997797		223.8	0.2238	1.681	0	0.997556		-0.00024115				1.687	0.998244	0.998195		0.998806	0.999589
								1.682	422.2	0.4222	1.682	0	0.997797		224.2	0.2242	1.682	0	0.997556		-0.00024115				1.688	0.998245	0.998199		0.99881	0.999591
								1.683	423.3	0.4233	1.683	0	0.997797		224.6	0.2246	1.683	0	0.997556		-0.00024115				1.689	0.998247	0.998203		0.998814	0.999592
								1.684	425.1	0.4251	1.684	0	0.997797		225.1	0.2251	1.684	0	0.997556		-0.00024115				1.69	0.998248	0.998206		0.998817	0.999594
								1.685	429.9	0.4299	1.685	0	0.997797		225.2	0.2252	1.685	0	0.997556		-0.00024115				1.691	0.99825	0.99821		0.998821	0.999595
								1.686	432.9	0.4329	1.686	0	0.997797		225.4	0.2254	1.686	0	0.997556		-0.00024115				1.692	0.998251	0.998214		0.998825	0.999597
								1.687	436.7	0.4367	1.687	0	0.997797		225.9	0.2259	1.687	0	0.997556		-0.00024115				1.693	0.998253	0.998217		0.998829	0.999599
								1.688	441	0.441	1.688	0	0.997797		226.1	0.2261	1.688	0	0.997556		-0.00024115				1.694	0.998254	0.998221		0.998833	0.9996
								1.689	441.7	0.4417	1.689	0	0.997797		226.4	0.2264	1.689	0	0.997556		-0.00024115				1.695	0.998256	0.998225		0.998836	0.999602
								1.69	443.8	0.4438	1.69	0	0.997797		226.8	0.2268	1.69	0	0.997556		-0.00024115				1.696	0.998257	0.998228		0.99884	0.999603
								1.691	444	0.444	1.691	0	0.997797		227	0.227	1.691	0	0.997556		-0.00024115				1.697	0.998259	0.998232		0.998844	0.999605
								1.692	445	0.445	1.692	0	0.997797		228.5	0.2285	1.692	0	0.997556		-0.00024115				1.698	0.99826	0.998236		0.998848	0.999607
								1.693	450.7	0.4507	1.693	0	0.997797		229.3	0.2293	1.693	0	0.997556		-0.00024115				1.699	0.998262	0.998239		0.998851	0.999608
								1.694	451.6	0.4516	1.694	0	0.997797		229.5	0.2295	1.694	0	0.997556		-0.00024115				1.7	0.998263	0.998243		0.998855	0.99961
								1.695	457.1	0.4571	1.695	0	0.997797		230	0.23	1.695	0	0.997556		-0.00024115				1.701	0.998264	0.998246		0.998859	0.999611
								1.696	463.4	0.4634	1.696	0	0.997797		230.9	0.2309	1.696	0	0.997556		-0.00024115				1.702	0.998266	0.99825		0.998863	0.999613
								1.697	465.5	0.4655	1.697	0	0.997797		231.5	0.2315	1.697	0	0.997556		-0.00024115				1.703	0.998267	0.998253		0.998866	0.999614
								1.698	466	0.466	1.698	0	0.997797		232	0.232	1.698	0	0.997556		-0.00024115				1.704	0.998269	0.998257		0.99887	0.999616
								1.699	466.2	0.4662	1.699	0	0.997797		232.2	0.2322	1.699	0	0.997556		-0.00024115				1.705	0.99827	0.998261		0.998874	0.999617
								1.7	470.9	0.4709	1.7	0	0.997797		232.2	0.2322	1.7	0	0.997556		-0.00024115				1.706	0.998271	0.998264		0.998877	0.999619
								1.701	471.1	0.4711	1.701	0	0.997797		233.1	0.2331	1.701	0	0.997556		-0.00024115				1.707	0.998273	0.998268		0.998881	0.99962
								1.702	474.8	0.4748	1.702	0	0.997797		233.1	0.2331	1.702	0	0.997556		-0.00024115				1.708	0.998274	0.998271		0.998884	0.999622
								1.703	480.6	0.4806	1.703	0	0.997797		233.6	0.2336	1.703	0	0.997556		-0.00024115				1.709	0.998276	0.998275		0.998888	0.999624
								1.704	480.7	0.4807	1.704	0	0.997797		234.3	0.2343	1.704	0	0.997556		-0.00024115				1.71	0.998277	0.998278		0.998892	0.999625
								1.705	485.8	0.4858	1.705	0	0.997797		234.3	0.2343	1.705	0	0.997556		-0.00024115				1.711	0.998278	0.998282		0.998895	0.999626
								1.706	486.5	0.4865	1.706	0	0.997797		234.9	0.2349	1.706	0	0.997556		-0.00024115				1.712	0.99828	0.998285		0.998899	0.999628
								1.707	487.2	0.4872	1.707	0	0.997797		236.5	0.2365	1.707	0	0.997556		-0.00024115				1.713	0.998281	0.998288		0.998902	0.999629
								1.708	487.5	0.4875	1.708	0	0.997797		236.9	0.2369	1.708	0	0.997556		-0.00024115				1.714	0.998282	0.998292		0.998906	0.999631
								1.709	490.3	0.4903	1.709	0	0.997797		237.2	0.2372	1.709	0	0.997556		-0.00024115				1.715	0.998284	0.998295		0.998909	0.999632
								1.71	492.8	0.4928	1.71	0	0.997797		237.6	0.2376	1.71	0	0.997556		-0.00024115				1.716	0.998285	0.998299		0.998913	0.999634
								1.711	494.1	0.4941	1.711	0	0.997797		237.8	0.2378	1.711	0	0.997556		-0.00024115				1.717	0.998286	0.998302		0.998917	0.999635
								1.712	494.4	0.4944	1.712	0	0.997797		238.1	0.2381	1.712	0	0.997556		-0.00024115				1.718	0.998288	0.998305		0.99892	0.999637
								1.713	498.4	0.4984	1.713	0	0.997797		238.3	0.2383	1.713	0	0.997556		-0.00024115				1.719	0.998289	0.998309		0.998924	0.999638
								1.714	501.3	0.5013	1.714	0	0.997797		239	0.239	1.714	0	0.997556		-0.00024115				1.72	0.99829	0.998312		0.998927	0.99964
								1.715	508	0.508	1.715	0	0.997797		242.1	0.2421	1.715	0	0.997556		-0.00024115				1.721	0.998292	0.998316		0.99893	0.999641
								1.716	508.7	0.5087	1.716	0	0.997797		243.5	0.2435	1.716	0	0.997556		-0.00024115				1.722	0.998293	0.998319		0.998934	0.999643
								1.717	512.3	0.5123	1.717	0	0.997797		243.7	0.2437	1.717	0	0.997556		-0.00024115				1.723	0.998294	0.998322		0.998937	0.999644
								1.718	514.6	0.5146	1.718	0	0.997797		244.3	0.2443	1.718	0	0.997556		-0.00024115				1.724	0.998296	0.998326		0.998941	0.999645
								1.719	515.1	0.5151	1.719	0	0.997797		244.8	0.2448	1.719	0	0.997556		-0.00024115				1.725	0.998297	0.998329		0.998944	0.999647
								1.72	517.3	0.5173	1.72	0	0.997797		246.2	0.2462	1.72	0	0.997556		-0.00024115				1.726	0.998298	0.998332		0.998948	0.999648
								1.721	517.5	0.5175	1.721	0	0.997797		247.6	0.2476	1.721	0	0.997556		-0.00024115				1.727	0.998299	0.998335		0.998951	0.99965
								1.722	519	0.519	1.722	0	0.997797		247.7	0.2477	1.722	0	0.997556		-0.00024115				1.728	0.998301	0.998339		0.998954	0.999651
								1.723	523.1	0.5231	1.723	0	0.997797		248	0.248	1.723	0	0.997556		-0.00024115				1.729	0.998302	0.998342		0.998958	0.999652
								1.724	524.9	0.5249	1.724	0	0.997797		248.3	0.2483	1.724	0	0.997556		-0.00024115				1.73	0.998303	0.998345		0.998961	0.999654
								1.725	527.3	0.5273	1.725	0	0.997797		248.5	0.2485	1.725	0	0.997556		-0.00024115				1.731	0.998305	0.998349		0.998965	0.999655
								1.726	527.3	0.5273	1.726	0	0.997797		249.1	0.2491	1.726	0	0.997556		-0.00024115				1.732	0.998306	0.998352		0.998968	0.999656
								1.727	535	0.535	1.727	0	0.997797		249.4	0.2494	1.727	0	0.997556		-0.00024115				1.733	0.998307	0.998355		0.998971	0.999658
								1.728	536.6	0.5366	1.728	0	0.997797		249.4	0.2494	1.728	0	0.997556		-0.00024115				1.734	0.998308	0.998358		0.998975	0.999659
								1.729	538.6	0.5386	1.729	0	0.997797		251.3	0.2513	1.729	0	0.997556		-0.00024115				1.735	0.99831	0.998361		0.998978	0.999661
								1.73	544.9	0.5449	1.73	0	0.997797		251.8	0.2518	1.73	0	0.997556		-0.00024115				1.736	0.998311	0.998365		0.998981	0.999662
								1.731	550	0.55	1.731	0	0.997797		252.1	0.2521	1.731	0	0.997556		-0.00024115				1.737	0.998312	0.998368		0.998985	0.999663
								1.732	550.5	0.5505	1.732	0	0.997797		252.2	0.2522	1.732	0	0.997556		-0.00024115				1.738	0.998313	0.998371		0.998988	0.999665
								1.733	552.3	0.5523	1.733	0	0.997797		252.8	0.2528	1.733	0	0.997556		-0.00024115				1.739	0.998314	0.998374		0.998991	0.999666
								1.734	552.6	0.5526	1.734	0	0.997797		253.3	0.2533	1.734	0	0.997556		-0.00024115				1.74	0.998316	0.998377		0.998994	0.999667
								1.735	553.2	0.5532	1.735	0	0.997797		253.3	0.2533	1.735	0	0.997556		-0.00024115				1.741	0.998317	0.99838		0.998998	0.999669
								1.736	555.8	0.5558	1.736	0	0.997797		253.5	0.2535	1.736	0	0.997556		-0.00024115				1.742	0.998318	0.998384		0.999001	0.99967
								1.737	562.5	0.5625	1.737	0	0.997797		254.3	0.2543	1.737	0	0.997556		-0.00024115				1.743	0.998319	0.998387		0.999004	0.999671
								1.738	565.9	0.5659	1.738	0	0.997797		254.3	0.2543	1.738	0	0.997556		-0.00024115				1.744	0.998321	0.99839		0.999007	0.999673
								1.739	576.1	0.5761	1.739	0	0.997797		254.7	0.2547	1.739	0	0.997556		-0.00024115				1.745	0.998322	0.998393		0.99901	0.999674
								1.74	577.1	0.5771	1.74	0	0.997797		256.4	0.2564	1.74	0	0.997556		-0.00024115				1.746	0.998323	0.998396		0.999014	0.999675
								1.741	579.7	0.5797	1.741	0	0.997797		257.6	0.2576	1.741	0	0.997556		-0.00024115				1.747	0.998324	0.998399		0.999017	0.999676
								1.742	584.9	0.5849	1.742	0	0.997797		258.1	0.2581	1.742	0	0.997556		-0.00024115				1.748	0.998325	0.998402		0.99902	0.999678
								1.743	586.2	0.5862	1.743	0	0.997797		258.6	0.2586	1.743	0	0.997556		-0.00024115				1.749	0.998326	0.998405		0.999023	0.999679
								1.744	589.5	0.5895	1.744	0	0.997797		258.9	0.2589	1.744	0	0.997556		-0.00024115				1.75	0.998328	0.998408		0.999026	0.99968
								1.745	590.5	0.5905	1.745	0	0.997797		259.6	0.2596	1.745	0	0.997556		-0.00024115				1.751	0.998329	0.998411		0.99903	0.999682
								1.746	590.8	0.5908	1.746	0	0.997797		259.8	0.2598	1.746	0	0.997556		-0.00024115				1.752	0.99833	0.998414		0.999033	0.999683
								1.747	592.1	0.5921	1.747	0	0.997797		260.2	0.2602	1.747	0	0.997556		-0.00024115				1.753	0.998331	0.998417		0.999036	0.999684
								1.748	600.4	0.6004	1.748	0	0.997797		262.8	0.2628	1.748	0	0.997556		-0.00024115				1.754	0.998332	0.99842		0.999039	0.999685
								1.749	608.2	0.6082	1.749	0	0.997797		263	0.263	1.749	0	0.997556		-0.00024115				1.755	0.998333	0.998423		0.999042	0.999687
								1.75	611.3	0.6113	1.75	0	0.997797		263.9	0.2639	1.75	0	0.997556		-0.00024115				1.756	0.998335	0.998426		0.999045	0.999688
								1.751	611.3	0.6113	1.751	0	0.997797		265.2	0.2652	1.751	0	0.997556		-0.00024115				1.757	0.998336	0.998429		0.999048	0.999689
								1.752	617.1	0.6171	1.752	0	0.997797		265.7	0.2657	1.752	0	0.997556		-0.00024115				1.758	0.998337	0.998432		0.999051	0.99969
								1.753	626.1	0.6261	1.753	0	0.997797		265.7	0.2657	1.753	0	0.997556		-0.00024115				1.759	0.998338	0.998435		0.999054	0.999692
								1.754	652.7	0.6527	1.754	0	0.997797		266.3	0.2663	1.754	0	0.997556		-0.00024115				1.76	0.998339	0.998438		0.999057	0.999693
								1.755	652.7	0.6527	1.755	0	0.997797		266.8	0.2668	1.755	0	0.997556		-0.00024115				1.761	0.99834	0.998441		0.99906	0.999694
								1.756	669	0.669	1.756	0	0.997797		266.9	0.2669	1.756	0	0.997556		-0.00024115				1.762	0.998341	0.998444		0.999064	0.999695
								1.757	670.1	0.6701	1.757	0	0.997797		267.9	0.2679	1.757	0	0.997556		-0.00024115				1.763	0.998342	0.998447		0.999067	0.999696
								1.758	670.5	0.6705	1.758	0	0.997797		268.8	0.2688	1.758	0	0.997556		-0.00024115				1.764	0.998343	0.99845		0.99907	0.999698
								1.759	676.9	0.6769	1.759	0	0.997797		268.8	0.2688	1.759	0	0.997556		-0.00024115				1.765	0.998345	0.998453		0.999073	0.999699
								1.76	677	0.677	1.76	0	0.997797		270.4	0.2704	1.76	0	0.997556		-0.00024115				1.766	0.998346	0.998456		0.999076	0.9997
								1.761	694.1	0.6941	1.761	0	0.997797		270.6	0.2706	1.761	0	0.997556		-0.00024115				1.767	0.998347	0.998459		0.999079	0.999701
								1.762	704.3	0.7043	1.762	0	0.997797		270.8	0.2708	1.762	0	0.997556		-0.00024115				1.768	0.998348	0.998462		0.999082	0.999702
								1.763	706.1	0.7061	1.763	0	0.997797		271.2	0.2712	1.763	0	0.997556		-0.00024115				1.769	0.998349	0.998464		0.999085	0.999704
								1.764	712.4	0.7124	1.764	0	0.997797		271.7	0.2717	1.764	0	0.997556		-0.00024115				1.77	0.99835	0.998467		0.999087	0.999705
								1.765	721.4	0.7214	1.765	0	0.997797		273.9	0.2739	1.765	0	0.997556		-0.00024115				1.771	0.998351	0.99847		0.99909	0.999706
								1.766	728.7	0.7287	1.766	0	0.997797		274.4	0.2744	1.766	0	0.997556		-0.00024115				1.772	0.998352	0.998473		0.999093	0.999707
								1.767	732.2	0.7322	1.767	0	0.997797		275.7	0.2757	1.767	0	0.997556		-0.00024115				1.773	0.998353	0.998476		0.999096	0.999708
								1.768	734.2	0.7342	1.768	0	0.997797		276.1	0.2761	1.768	0	0.997556		-0.00024115				1.774	0.998354	0.998479		0.999099	0.999709
								1.769	755.6	0.7556	1.769	0	0.997797		277.3	0.2773	1.769	0	0.997556		-0.00024115				1.775	0.998355	0.998481		0.999102	0.999711
								1.77	762.1	0.7621	1.77	0	0.997797		277.8	0.2778	1.77	0	0.997556		-0.00024115				1.776	0.998356	0.998484		0.999105	0.999712
								1.771	774.5	0.7745	1.771	0	0.997797		278.1	0.2781	1.771	0	0.997556		-0.00024115				1.777	0.998357	0.998487		0.999108	0.999713
								1.772	779.9	0.7799	1.772	0	0.997797		281.1	0.2811	1.772	0	0.997556		-0.00024115				1.778	0.998358	0.99849		0.999111	0.999714
								1.773	784	0.784	1.773	0	0.997797		281.5	0.2815	1.773	0	0.997556		-0.00024115				1.779	0.99836	0.998493		0.999114	0.999715
								1.774	785.3	0.7853	1.774	0	0.997797		281.7	0.2817	1.774	0	0.997556		-0.00024115				1.78	0.998361	0.998495		0.999117	0.999716
								1.775	788.2	0.7882	1.775	0	0.997797		282.1	0.2821	1.775	0	0.997556		-0.00024115				1.781	0.998362	0.998498		0.999119	0.999717
								1.776	793.6	0.7936	1.776	0	0.997797		282.9	0.2829	1.776	0	0.997556		-0.00024115				1.782	0.998363	0.998501		0.999122	0.999719
								1.777	803	0.803	1.777	0	0.997797		283	0.283	1.777	0	0.997556		-0.00024115				1.783	0.998364	0.998504		0.999125	0.99972
								1.778	811	0.811	1.778	0	0.997797		283.6	0.2836	1.778	0	0.997556		-0.00024115				1.784	0.998365	0.998506		0.999128	0.999721
								1.779	817.3	0.8173	1.779	0	0.997797		283.7	0.2837	1.779	0	0.997556		-0.00024115				1.785	0.998366	0.998509		0.999131	0.999722
								1.78	818.2	0.8182	1.78	0	0.997797		283.9	0.2839	1.78	0	0.997556		-0.00024115				1.786	0.998367	0.998512		0.999134	0.999723
								1.781	826.6	0.8266	1.781	0	0.997797		284	0.284	1.781	0	0.997556		-0.00024115				1.787	0.998368	0.998515		0.999136	0.999724
								1.782	861.6	0.8616	1.782	0	0.997797		284	0.284	1.782	0	0.997556		-0.00024115				1.788	0.998369	0.998517		0.999139	0.999725
								1.783	862.6	0.8626	1.783	0	0.997797		284.2	0.2842	1.783	0	0.997556		-0.00024115				1.789	0.99837	0.99852		0.999142	0.999726
								1.784	920.6	0.9206	1.784	0	0.997797		284.8	0.2848	1.784	0	0.997556		-0.00024115				1.79	0.998371	0.998523		0.999145	0.999727
								1.785	940.7	0.9407	1.785	0	0.997797		286.4	0.2864	1.785	0	0.997556		-0.00024115				1.791	0.998372	0.998525		0.999147	0.999728
								1.786	951.4	0.9514	1.786	0	0.997797		286.4	0.2864	1.786	0	0.997556		-0.00024115				1.792	0.998373	0.998528		0.99915	0.99973
								1.787	960.4	0.9604	1.787	0	0.997797		286.6	0.2866	1.787	0	0.997556		-0.00024115				1.793	0.998374	0.998531		0.999153	0.999731
								1.788	976	0.976	1.788	0	0.997797		286.8	0.2868	1.788	0	0.997556		-0.00024115				1.794	0.998375	0.998533		0.999156	0.999732
[truncated: 1,904 more rows]

## Sheet: FIg 4C
															CONTROL						ANISO						Control
[truncated: 6,205 more rows]

[truncated: 7 more sheets: Fig 4D, Fig 4E1, Fig 4E2, Fig 4F1, Fig 4F2, Fig 4F3, Fig 4F (extra not in fig)]
