# Supplementary material for: Active presynaptic ribosomes in the mammalian brain, and altered transmitter release after protein synthesis inhibition
Source: eLife. 2018 Oct 30;7:e36697. doi: 10.7554/eLife.36697 (PMC6231766; doi:10.7554/eLife.36697)
Supplement: Figure 5—source data 1. [file elife-36697-fig5-data1.xlsx]

## Sheet: Fig 5B, rise
EPSC Rise Time					Initial Rise Time
Age	Date	Control	Anisomycin		Control	Anisomycin
P10	2017-03-29	0.8375	0.8		0.732583	0.690625
P12	2017-04-06	0.6	0.5375		SE	SE
P8	2017-04-17	0.75	0.7		0.0396988	0.0327114
P9	2017-04-25	0.6875	0.75
P7	2017-05-16	0.7875	0.8
P7	2017-05-16	0.975	N/A		Ttest
P9	2017-05-18	0.6375	0.6125		0.434439
P10	2017-05-25	0.6375	0.6375
P10	2017-05-25	0.68075	0.6875
	Averages	0.732583	0.690625
	count	9	8
	SEM	0.0396988	0.0327114
	TTEST	0.434439
		0.9665

## Sheet: Fig 5C, decay
EPSC Decay Time
Age	Date	Control	Anisomycin		Initial EPSC Decay Time
P10	2017-03-29	0.85	0.8125		Control	Anisomycin
P12	2017-04-06	0.675	0.4875		0.888889	0.764062
P8	2017-04-17	1.075	0.725		SE	SE
P9	2017-04-25	0.9875	0.9625		0.0628616	0.0526866
P7	2017-05-16	1.1	0.8
P7	2017-05-16	1.0875	N/A
P9	2017-05-18	0.9125	0.8375		Ttest
P10	2017-05-25	0.6625	0.625		0.154372
P10	2017-05-25	0.65	0.8625
	Averages	0.888889	0.764062
	count	9	8
	SEM	0.0628616	0.0526866
	TTEST	0.154372
		0.279

## Sheet: Fig 5D, latency
EPSC Latency
Age	Date	Control	Anisomycin		Initial Latency
P10	2017-03-29	2.4875	2.0875		Control	Anisomycin
P12	2017-04-06	1.675	1.525		2.03472	1.91406
P8	2017-04-17	2.1	1.875		SE	SE
P9	2017-04-25	1.9375	1.875		0.111235	0.149971
P7	2017-05-16	2.5125	2.875
P7	2017-05-16	2.3125	N/A		Ttest
P9	2017-05-18	1.7125	1.675		0.521866
P10	2017-05-25	1.8625	1.7375
P10	2017-05-25	1.7125	1.6625
	Averages	2.03472	1.91406
	count	9	8
	SEM	0.111235	0.149971
	TTEST	0.521866
		0.6898

## Sheet: Fig 5E, Amps
Amplitude
Age	Date	Control	Anisomycin		Initial EPSC Amplitude
P10	2017-03-29	6.15953	1.83107		Control	Anisomycin
P12	2017-04-06	6.39815	3.67057		6.21377	4.04892
P8	2017-04-17	7.58432	2.622		SE	SE
P9	2017-04-25	6.46591	6.32338		0.413238	0.635752
P7	2017-05-16	7.02646	1.91233
P7	2017-05-16	4.18275	N/A		Ttest
P9	2017-05-18	4.79421	4.75009		0.0127226
P10	2017-05-25	7.09881	5.29675
P10	2017-05-25		5.98519
	Averages	6.21377	4.04892
	count	8	8
	SEM	0.413238	0.635752
	TTEST	0.0127226
		0.0925

## Sheet: Fig 5F, Area
EPSC Area		nA*msec
Age	Date	Control	Anisomycin		Initial EPSC Area
P10	2017-03-29	6.68772	1.869		Control	Anisomycin
P12	2017-04-06	5.41911	2.4519		6.75431	4.25503
P8	2017-04-17	9.34206	2.44744		SE	SE
P9	2017-04-25	7.2144	7.35247		0.545497	0.941363
P7	2017-05-16	8.87865	1.98109
P7	2017-05-16	5.22346	N/A
P9	2017-05-18	5.04833	4.50895		Ttest
P10	2017-05-25	6.22074	4.42519		0.0209404
P10	2017-05-25	9.48	9.00424
	Averages	6.75431	4.25503
	stdev	1.63649	2.66258
	count	9	8
	SEM	0.545497	0.941363
	TTEST	0.0401438
		0.0074
