# Supplementary material for: Active presynaptic ribosomes in the mammalian brain, and altered transmitter release after protein synthesis inhibition
Source: eLife. 2018 Oct 30;7:e36697. doi: 10.7554/eLife.36697 (PMC6231766; doi:10.7554/eLife.36697)
Supplement: Figure 6—figure supplement 1—source data 1. [file elife-36697-fig6-figsupp1-data1.xlsx]

## Sheet: Fig6,supplement1A
	Control			Emetine
	avg	SE	TTEST	avg	SE
	0.560432	0.0960098	0.0317126	0.784887	0.0986216
	X-axis	PPR	Cell
	0.95	0.673735	Control 1
	1.05	0.829267	Control 2
	0.9	0.87177	Control 3
	1.05	0.323143	Control 4
	1	0.23753	Control 5
	1.05	0.627309	Control 6
	0.9	0.360267	Control 7
	X-axis	PPR	Cell
	1.85	0.928596	Emetine 1
	2	1.03863	Emetine 2
	2	0.822946	Emetine 3
	2	0.949592	Emetine 4
	2.07	0.406118	Emetine 5
	2.15	0.926056	Emetine 6
	1.93	0.422269	Emetine 7
	1	0.560432	avg control
	2	0.784887	avg emetine

## Sheet: Fig6,supplement1C
	Control			Emetine
	avg	SE	TTEST	avg	SE
	0.549423	0.0843989	0.00996682	0.801932	0.105652
	X-axis	PPR	Cell
	0.9	0.639896	Control 1
	1.1	0.789405	Control 2
	0.95	0.827349	Control 3
	0.85	0.307677	Control 4
	1	0.278985	Control 5
	1	0.601196	Control 6
	0.89	0.401453	Control 7
	X-axis	PPR	Cell
	2.05	0.91418	Emetine 1
	2.05	1.16989	Emetine 2
	1.87	0.915949	Emetine 3
	2.15	0.846844	Emetine 4
	1.95	0.407381	Emetine 5
	2.23	0.924828	Emetine 6
	2.08	0.434456	Emetine 7
