# Supplementary material for: Active presynaptic ribosomes in the mammalian brain, and altered transmitter release after protein synthesis inhibition
Source: eLife. 2018 Oct 30;7:e36697. doi: 10.7554/eLife.36697 (PMC6231766; doi:10.7554/eLife.36697)
Supplement: Figure 6—figure supplement 2—source data 1. [file elife-36697-fig6-figsupp2-data1.xlsx]

## Sheet: 100 Hz DMSO
		control	control			DMSO	DMSO
time		response	SEM			response	SEM
0.0028		1	0			1	0
0.0127		0.479576	0.0619916			0.542562	0.0562381
0.0227		0.253198	0.049785			0.331051	0.0491846
0.0327		0.178095	0.0433148			0.254476	0.0511923
0.0428		0.131929	0.0361022			0.185921	0.0454551
0.0528		0.100966	0.0277965			0.152377	0.0373348
0.0628		0.0991805	0.0280092			0.134501	0.031396
0.0729		0.0816174	0.0228291			0.117042	0.0281601
0.0828		0.0815603	0.0214431			0.131492	0.0337432
0.0929		0.0792503	0.0200711			0.105328	0.0253151
0.1028		0.0704366	0.018257			0.0966239	0.0215169
0.1128		0.0731169	0.0196997			0.103018	0.0230111
0.1229		0.0615894	0.0194009			0.0923992	0.0217496
0.1328		0.0593616	0.0187111			0.0919483	0.0226549
0.1429		0.0600518	0.0164795			0.0898967	0.0226671
0.1529		0.0616502	0.0173164			0.0788029	0.021011
0.1629		0.0589331	0.0155458			0.0996036	0.0272831
0.1728		0.0606329	0.0167698			0.0829119	0.0187751
0.183		0.0517076	0.0168068			0.0878342	0.0231485
0.193		0.0649594	0.0150336			0.0790547	0.0209854
0.2029		0.0570639	0.016125			0.0687444	0.0138237
0.2129		0.0586285	0.0171331			0.0827413	0.0178971
0.2229		0.0528345	0.0150438			0.0674829	0.0177221
0.2329		0.0619858	0.0137221			0.0808863	0.0188637
0.2428		0.0564162	0.0138209			0.0613661	0.0122589
0.2529		0.0585402	0.0155461			0.0823652	0.0217567
0.2628		0.0519633	0.0158244			0.0829753	0.020018
0.273		0.0499497	0.0118597			0.0723197	0.0199604
0.2828		0.0575934	0.0137049			0.0814766	0.0199582
0.2927		0.0541781	0.0152627			0.0764666	0.0144346
0.3028		0.0655828	0.0166052			0.0708051	0.0171149
0.3129		0.0645825	0.0189511			0.0680116	0.0165205
0.323		0.0562516	0.0126656			0.0668006	0.0151808
0.3328		0.0602517	0.0185245			0.0675163	0.0147146
0.3429		0.0645786	0.0153749			0.0649764	0.0166124
0.3529		0.0593088	0.0138747			0.0690209	0.0164771
0.3629		0.0488213	0.0142011			0.0791928	0.0206946
0.3729		0.0543961	0.0146072			0.0724659	0.0191878
0.383		0.0594607	0.0139499			0.0697237	0.0177495
0.3929		0.0524133	0.0134807			0.0840814	0.0240544
0.4029		0.0474509	0.0144285			0.0685654	0.0197366
0.413		0.0594655	0.0144448			0.0720431	0.016328
0.423		0.0595635	0.0158487			0.0765714	0.0211511
0.4329		0.0523695	0.0127646			0.0769093	0.020639
0.4429		0.0511292	0.0131402			0.0755068	0.0182391
0.4529		0.0613211	0.0148484			0.0718283	0.0182838
0.463		0.0504078	0.0125166			0.0771851	0.0195994
0.4729		0.0544571	0.012876			0.0711114	0.0200858
0.4829		0.0559735	0.0150206			0.0710412	0.0195284
0.4932		0.0506342	0.0109549			0.0711804	0.0188153
0.5029		0.0549772	0.0131643			0.0733404	0.0178243
0.5129		0.0456026	0.0095207			0.067651	0.0161402
0.5229		0.0474026	0.0128296			0.0683391	0.0158813
0.533		0.0460586	0.010273			0.0815713	0.0232631
0.5429		0.064637	0.017897			0.0736019	0.0197172
0.5531		0.0495751	0.0148002			0.0565811	0.0150785
0.5629		0.0551089	0.0141669			0.0710933	0.0173568
0.5729		0.0588439	0.0122326			0.0673898	0.0179544
0.5829		0.0490594	0.0121443			0.0794092	0.0224371
0.5928		0.0485257	0.012562			0.0585093	0.012824
0.603		0.0406429	0.0113466			0.0773303	0.0197364
0.6128		0.0537284	0.0128006			0.071292	0.0199685
0.623		0.0477094	0.010631			0.0705096	0.0203513
0.633		0.0509162	0.0114503			0.0663175	0.0168104
0.6429		0.05161	0.013645			0.0765225	0.0208845
0.6531		0.0484176	0.0111006			0.065838	0.0168832
0.663		0.0520446	0.0135529			0.0619047	0.0162409
0.6729		0.0510727	0.0122477			0.0671232	0.0173475
0.6829		0.0463097	0.0133653			0.0720978	0.0197562
0.693		0.0532317	0.0145885			0.0619751	0.0152344
0.703		0.0404018	0.012903			0.0779763	0.0211842
0.7129		0.0442124	0.0102461			0.0668498	0.0174671
0.723		0.0503312	0.0140774			0.0728976	0.0165744
0.7329		0.0468147	0.0118689			0.0735965	0.0213732
0.743		0.04349	0.0111237			0.0687719	0.0190613
0.7529		0.0484749	0.00984783			0.0747258	0.0198711
0.7629		0.0486099	0.0119791			0.0645779	0.0209363
0.773		0.0537254	0.0135422			0.0641657	0.0139568
0.7829		0.0418652	0.0107118			0.0630106	0.0166055
0.7929		0.0414575	0.0100701			0.0632442	0.016652
0.8029		0.0387715	0.0117529			0.0748651	0.0202687
0.8129		0.0506594	0.0120199			0.0704041	0.0183303
0.8229		0.0438892	0.00944573			0.0641435	0.0148606
0.8329		0.0410701	0.0129857			0.0766356	0.0209977
0.8429		0.0447529	0.0102006			0.0633704	0.0157694
0.8529		0.0463206	0.0118178			0.0807664	0.0216806
0.8629		0.0465485	0.0114293			0.0749564	0.0202912
0.8732		0.0443694	0.0109321			0.0696695	0.0152938
0.883		0.0454351	0.0124056			0.0603984	0.0179969
0.893		0.0404844	0.00982579			0.071445	0.0180497
0.9029		0.0479053	0.01373			0.0570867	0.0150385
0.913		0.0468115	0.0108582			0.0752624	0.0224461
0.923		0.04516	0.0119311			0.0644827	0.0178618
0.9329		0.0479302	0.0134781			0.0562079	0.0184341
0.9429		0.0446321	0.00932015			0.0625685	0.015282
0.9529		0.0509662	0.0168741			0.0788182	0.0218205
0.963		0.0518016	0.0129349			0.0625613	0.0171536
0.9729		0.04767	0.0117196			0.0654664	0.0165945
0.9829		0.0459477	0.0132077			0.0620167	0.0168557
0.993		0.0443517	0.0124377			0.0664519	0.0200302
1.0029		0.0533388	0.0124427			0.0497876	0.0114052
1.0129		0.0374928	0.00869432			0.0579056	0.0142955
1.023		0.0525967	0.0139431			0.0636784	0.0189536
1.033		0.043386	0.012439			0.0812097	0.0274605
1.0429		0.0387093	0.00898822			0.05829	0.0154578
1.0531		0.052043	0.0126618			0.0622681	0.0138177
1.0629		0.0426991	0.0100041			0.0685921	0.0172686
1.0731		0.0361215	0.0101292			0.0688314	0.0217337
1.0831		0.0384028	0.0107052			0.0631298	0.0159651
1.0929		0.0355605	0.00923301			0.07352	0.020567
1.103		0.0410869	0.0124926			0.0718781	0.0199074
1.113		0.041106	0.00889487			0.0749605	0.0194426
1.1231		0.0386118	0.00994647			0.0721096	0.0205313
1.133		0.040659	0.00844976			0.0692	0.0193111
1.1429		0.0457233	0.0103386			0.0629813	0.0139995
1.153		0.0426776	0.01011			0.0530013	0.0114418
1.1629		0.0498181	0.0118842			0.0695839	0.0199862
1.1729		0.0416634	0.0101543			0.0658745	0.016878
1.183		0.038225	0.00959676			0.0627074	0.01734
1.193		0.0445669	0.0106689			0.0631446	0.0133231
1.203		0.0431589	0.0115856			0.0707021	0.0201077
1.213		0.0382696	0.010016			0.0673752	0.017695
1.223		0.0444012	0.0101946			0.0670741	0.0164674
1.2329		0.0316697	0.0102336			0.0653552	0.0166667
1.2429		0.042704	0.0104224			0.063684	0.0179846
1.2529		0.0443382	0.0118926			0.0673567	0.0189569
1.2631		0.0330015	0.00964055			0.0633351	0.0189501
1.2729		0.034552	0.00966472			0.0505532	0.0132812
1.2831		0.0419949	0.0119617			0.0564175	0.0133932
1.2929		0.0419076	0.0109741			0.0762026	0.0210566
1.3029		0.040895	0.0112085			0.0549035	0.0137444
1.3129		0.0413498	0.0106066			0.0674193	0.0172307
1.323		0.0406762	0.00983548			0.0740606	0.0211545
1.333		0.0425866	0.00868277			0.0789324	0.0219779
1.3429		0.0369048	0.00981467			0.0626824	0.0194797
1.353		0.042314	0.0128056			0.0660105	0.0175449
1.3629		0.0392312	0.00965755			0.0534303	0.0129405
1.373		0.0390782	0.0107762			0.0665795	0.0178728
1.383		0.0285296	0.00893403			0.0668926	0.017622
1.393		0.0506069	0.0115764			0.0650065	0.0167348
1.403		0.0369129	0.0101381			0.0699188	0.0186101
1.413		0.0385837	0.0100919			0.0696677	0.0214136
1.423		0.0457042	0.0123475			0.0746581	0.0228179
1.433		0.0434719	0.0110095			0.063618	0.01821
1.443		0.0380455	0.00921091			0.0532269	0.0146557
1.4529		0.0398827	0.00885128			0.0675678	0.0193284
1.463		0.0411544	0.0106503			0.0625238	0.0162627
1.4728		0.0361727	0.00840302			0.0567485	0.0152676
1.483		0.0364346	0.0105679			0.0646744	0.0177953
1.4929		0.0346506	0.00910546			0.0509281	0.0116921
1.503		0.0426535	0.00929787			0.0714235	0.0198594
1.513		0.0344134	0.0086393			0.0545538	0.013279
1.523		0.0379579	0.0109541			0.0650137	0.0168739
1.5329		0.0446641	0.0116278			0.0636058	0.0183671
1.5429		0.043857	0.0103271			0.0666684	0.0165735
1.5531		0.0347876	0.009401			0.0613115	0.0172041
1.5631		0.0391754	0.0120733			0.0634818	0.0177052
1.5731		0.042236	0.011757			0.0569329	0.0153209
1.583		0.0431377	0.0134077			0.0636491	0.0183003
1.5931		0.0371125	0.00829001			0.0643928	0.017525
1.603		0.038462	0.00887033			0.0701866	0.0230606
1.613		0.0371656	0.00856165			0.0656511	0.0187559
1.6231		0.0420759	0.00991783			0.0619107	0.016523
1.6329		0.0392219	0.0100529			0.0581932	0.0152763
1.643		0.0442394	0.0120718			0.0675052	0.018678
1.653		0.0395206	0.010241			0.0645542	0.0187521
1.6629		0.0435163	0.0131811			0.0614235	0.0167991
1.6729		0.0404896	0.00971072			0.0565305	0.0156223
1.6829		0.0436082	0.0123768			0.0625462	0.0168477
1.693		0.0440897	0.0117352			0.0744602	0.0223748
1.7029		0.0402932	0.00834625			0.0620897	0.0162474
1.713		0.0438378	0.0104385			0.0591052	0.0160132
1.723		0.0354916	0.00992449			0.0530618	0.0168257
1.7329		0.0352716	0.00809213			0.0656103	0.017062
1.7431		0.0357261	0.00940779			0.0521759	0.011292
1.7531		0.0419691	0.0110791			0.0657084	0.0192508
1.7631		0.0392834	0.00921535			0.0580752	0.0150938
1.773		0.0401219	0.00901204			0.0599699	0.0166434
1.783		0.039734	0.00981909			0.0598385	0.0155023
1.7933		0.0378072	0.0108478			0.0570651	0.013332
1.803		0.039082	0.00966865			0.0501366	0.0126167
1.8129		0.0442369	0.0109125			0.0642318	0.0160361
1.8228		0.0344415	0.00871809			0.0665696	0.0189805
1.833		0.040136	0.0116629			0.067263	0.020329
1.843		0.0327762	0.0105477			0.0631606	0.0166788
1.8531		0.0335734	0.00964227			0.066692	0.0176882
1.863		0.0292073	0.0085603			0.0625804	0.0169993
1.8729		0.0333309	0.00994828			0.0673708	0.0224811
1.8829		0.0406786	0.010746			0.0621442	0.017499
1.893		0.0357112	0.0101578			0.0580396	0.0146984
1.9029		0.0423003	0.0106362			0.0539369	0.0139508
1.913		0.0380493	0.00947099			0.063005	0.0193305
1.923		0.0377044	0.0109939			0.0652443	0.01913
1.933		0.0333473	0.00883924			0.0681352	0.0208837
1.9431		0.0338706	0.00858742			0.0670887	0.023111
1.953		0.0325265	0.00925416			0.0552885	0.0152824
1.9632		0.0388507	0.0108321			0.0647835	0.0200665
1.973		0.0378975	0.0090407			0.0600707	0.0164705
1.983		0.0370976	0.00920489			0.0650491	0.0188914
1.9929		0.0419521	0.0110392			0.0621632	0.0172242
2.003		0.0366836	0.00956187			0.0570893	0.0145711
2.0131		0.0336297	0.00948391			0.0773039	0.0264341
2.023		0.0352552	0.00995444			0.0615566	0.0182132
2.0332		0.02821	0.00952484			0.058807	0.0164234
2.043		0.036451	0.00830151			0.0656344	0.0198545
2.053		0.0311671	0.00885345			0.0568824	0.0162639
2.0631		0.0415775	0.010788			0.0576626	0.0182375
2.073		0.0365546	0.00918403			0.0496064	0.0120872
2.0831		0.0366009	0.0116386			0.0576923	0.0174451
2.0932		0.035298	0.0107217			0.053608	0.0163323
2.103		0.0427231	0.0108002			0.0598555	0.0164671
2.1131		0.0350191	0.00858823			0.0596007	0.0170842
2.123		0.0319035	0.00738522			0.0543761	0.012286
2.133		0.0306686	0.00938975			0.0571481	0.0176693
2.143		0.0333996	0.00829261			0.0630636	0.0177348
2.153		0.0345611	0.00870616			0.0561826	0.0152578
2.163		0.0434369	0.0116886			0.0655416	0.0180659
2.1731		0.0426266	0.0129633			0.062129	0.0185959
2.1829		0.0312531	0.00898169			0.0532176	0.0156407
2.193		0.0371123	0.0093797			0.0669338	0.0212252
2.203		0.0354358	0.00864954			0.0553121	0.0163573
2.213		0.0314064	0.00756556			0.053933	0.015359
2.2229		0.0326148	0.0112046			0.0579023	0.0163805
2.233		0.0337504	0.00937029			0.0710008	0.0224203
2.2431		0.0316673	0.00727844			0.0550323	0.014349
2.253		0.0299176	0.00809401			0.0642334	0.0163896
2.2631		0.0367355	0.00932791			0.0560066	0.018535
2.273		0.0331547	0.00727892			0.0574999	0.015792
2.2829		0.0402585	0.0107589			0.0657198	0.0241427
2.293		0.0360243	0.0105829			0.0627134	0.0172673
2.303		0.0384012	0.0101483			0.0620803	0.0168017
2.313		0.0351343	0.00783663			0.0493645	0.0158044
2.3231		0.0350934	0.0107083			0.0550947	0.0163747
2.333		0.0358666	0.00871596			0.0686491	0.0206694
2.343		0.0327853	0.0092977			0.0612636	0.0206672
2.353		0.0285631	0.00741959			0.0505926	0.0154873
2.3632		0.0368081	0.00902594			0.0612419	0.0188638
2.373		0.0373969	0.00991898			0.0567327	0.0188066
2.383		0.0359145	0.00942551			0.0568692	0.0171752
2.3929		0.0347749	0.00980998			0.0630493	0.0177802
2.403		0.0424866	0.0111748			0.0627967	0.0172572
2.4129		0.0329648	0.0103085			0.0566054	0.016047
2.423		0.0351138	0.00846583			0.0559672	0.0147545
2.4331		0.035436	0.00960129			0.0663348	0.0213134
2.4433		0.0365997	0.0091132			0.0499956	0.0149798
2.4531		0.0350391	0.0111923			0.0549019	0.0145967
2.463		0.0386996	0.0109847			0.0617448	0.0175356
2.4733		0.0327073	0.00994123			0.0597749	0.0158984
2.4831		0.029177	0.00750298			0.060817	0.0207
2.4929		0.0316856	0.00921579			0.0559566	0.0135212
2.503		0.0347841	0.010005			0.0568159	0.0174304
2.513		0.0372138	0.0102178			0.0565424	0.0171328
2.5231		0.0365906	0.0103688			0.0582227	0.0162454
2.5332		0.0362711	0.00902874			0.0620115	0.0192215
2.543		0.0295756	0.00790085			0.0501363	0.0150029
2.5532		0.0338735	0.00994695			0.0556174	0.0167665
2.5629		0.0348515	0.00960534			0.0689927	0.0191172
2.5729		0.0377521	0.00834758			0.0612231	0.0179086
2.5831		0.0318617	0.0106532			0.063034	0.0202799
2.593		0.030869	0.00778966			0.0624021	0.0177462
2.6031		0.0302383	0.009041			0.0551489	0.0152169
2.6131		0.0337678	0.0081762			0.0520207	0.0179548
2.6232		0.0367019	0.0107737			0.072693	0.0227083
2.633		0.0394329	0.0109678			0.0645645	0.019876
2.6431		0.036215	0.00989636			0.0649346	0.0189768
2.6529		0.0314603	0.0092452			0.0586345	0.0163455
2.663		0.0372836	0.00890083			0.0542944	0.0158243
2.6732		0.0343059	0.00796291			0.0593405	0.0166532
2.6831		0.0387911	0.0106122			0.0582831	0.0163579
2.6929		0.0298831	0.00740169			0.0593302	0.0166551
2.703		0.0323811	0.00849464			0.0594145	0.0180302
2.713		0.0281341	0.00798744			0.0646398	0.0188733
2.7229		0.0343941	0.00983184			0.0519706	0.0151378
2.7332		0.032633	0.0100945			0.0604245	0.0179539
2.743		0.0360206	0.0100278			0.0600178	0.0167154
2.7531		0.0337151	0.00908966			0.0639279	0.0193385
2.763		0.0271584	0.00647005			0.0537937	0.0175066
2.773		0.0296424	0.00749281			0.0388356	0.0134762
2.7829		0.0392443	0.0113386			0.0561768	0.0153302
2.793		0.031958	0.00880307			0.0629032	0.01924
2.8031		0.0356703	0.00966052			0.0540013	0.0132925
2.8131		0.0306912	0.008818			0.0636351	0.0194012
2.823		0.038053	0.00932134			0.0608516	0.0178525
2.833		0.0288634	0.00805232			0.0497239	0.018091
2.8431		0.0302926	0.00778621			0.0607575	0.019922
2.853		0.03618	0.0098444			0.0664546	0.0217886
2.8629		0.0327586	0.0090251			0.0513155	0.0149852
2.873		0.0313824	0.0115622			0.0528366	0.0127389
2.8832		0.0367042	0.00961117			0.0634474	0.0212697
2.893		0.032574	0.00974967			0.0568908	0.0162517
2.9031		0.0283176	0.00856561			0.0601889	0.0204893
2.9131		0.0314959	0.00825154			0.0466846	0.0162467
2.923		0.0333846	0.0103854			0.0619387	0.0225505
2.9331		0.0318243	0.0084516			0.0583782	0.0187632
2.9429		0.0313526	0.0083691			0.0598915	0.0174882
2.9531		0.0360432	0.00966581			0.0571305	0.018046
2.963		0.0334784	0.0122691			0.057141	0.0150152
2.9729		0.0380271	0.00949914			0.0534811	0.0153648
2.983		0.0264853	0.0067891			0.0484925	0.0158374
2.993		0.0301747	0.00810405			0.057452	0.021018
3.0032		0.0355646	0.00906162			0.0554088	0.0145161
3.0132		0.0306814	0.0101922			0.0521873	0.0139566
3.0232		0.0333655	0.00869308			0.0491539	0.0157049
3.0334		0.0291021	0.0104818			0.0494235	0.0136741
3.043		0.0409131	0.0104515			0.0501652	0.0169688
3.0531		0.0370271	0.0103234			0.0587186	0.0168683
3.0631		0.0311683	0.0111063			0.0586653	0.0205968
3.073		0.033318	0.00810529			0.0524389	0.0141548
3.0831		0.036467	0.00965807			0.0625214	0.0184805
3.0931		0.0300425	0.00666785			0.0596563	0.0193202
3.1031		0.0304382	0.00734603			0.063141	0.0224986
3.1129		0.0331265	0.00894447			0.0608851	0.0193072
3.1231		0.0405555	0.0132248			0.0539156	0.0148264
3.1331		0.0309469	0.00843173			0.073496	0.024571
3.1431		0.0276942	0.007071			0.0676732	0.0212575
3.1531		0.02664	0.00581141			0.0534574	0.0154302
3.163		0.0334646	0.0087818			0.0591153	0.0192227
3.1729		0.0372626	0.0102271			0.050969	0.0139622
3.1829		0.0308437	0.00776363			0.0557537	0.016451
3.193		0.0335409	0.00917554			0.0480002	0.0146916
3.203		0.0324829	0.00790403			0.0644241	0.0202558
3.213		0.0376336	0.0100237			0.0587944	0.0146841
3.2231		0.0296469	0.00686318			0.0482891	0.0151606
3.2331		0.0327896	0.00840493			0.0498279	0.0140508
3.243		0.0376009	0.0097039			0.05711	0.0185628
3.253		0.0342442	0.00886177			0.051376	0.0145039
3.263		0.0283142	0.00636783			0.044927	0.0128916
3.2729		0.0356269	0.00962732			0.0571923	0.0150465
3.283		0.0359511	0.0106228			0.0562251	0.0163349
3.293		0.0338308	0.00870923			0.0558454	0.0205145
3.303		0.0262378	0.00750476			0.0601181	0.018384
3.313		0.0263153	0.00674934			0.0553066	0.0186515
3.323		0.0297537	0.00821287			0.0562396	0.0177881
3.333		0.0311585	0.00628593			0.0658522	0.0203055
3.343		0.0320186	0.00884899			0.063915	0.0198765
3.353		0.0362395	0.0101236			0.0676267	0.0204799
3.3631		0.0335193	0.00853485			0.0508563	0.0140996
3.373		0.0355653	0.00970359			0.0529784	0.0168882
3.3833		0.0306736	0.00736204			0.0485591	0.0151209
3.393		0.0340828	0.00956262			0.0545525	0.0179222
3.4031		0.0327494	0.00930497			0.054569	0.015957
3.413		0.0271362	0.00614238			0.0533102	0.0167988
3.4229		0.0332993	0.00735937			0.0556137	0.0150654
3.4332		0.025174	0.00670144			0.0641102	0.0201428
3.443		0.0297555	0.00746216			0.0533114	0.0176203
3.453		0.035963	0.00843326			0.0463961	0.0136175
3.463		0.039841	0.0127953			0.0525152	0.0171613
3.473		0.036595	0.0105519			0.0488341	0.015183
3.4831		0.0290659	0.00643611			0.0661551	0.0193956
3.493		0.0296798	0.00875701			0.0481858	0.0137621
3.5032		0.029911	0.00935114			0.057889	0.018223
3.513		0.0289621	0.00769551			0.0586931	0.0188579
3.523		0.0297491	0.00885957			0.0555226	0.0163112
3.5331		0.0292623	0.00885518			0.0561378	0.0177157
3.543		0.0315379	0.00839126			0.0453874	0.0122377
3.553		0.0310091	0.0096196			0.0555216	0.0183696
3.5631		0.0230332	0.00766236			0.0562145	0.0165172
3.573		0.0292834	0.00763351			0.0557769	0.0152342
3.5831		0.0251651	0.00662914			0.0529692	0.0140946
3.5932		0.0289692	0.00787475			0.0494083	0.0149143
3.603		0.0389386	0.0106321			0.0603792	0.0217309
3.613		0.0274487	0.00745088			0.0516193	0.0134416
3.623		0.0302469	0.00836019			0.0549674	0.0181334
3.6329		0.0317812	0.0100154			0.0629655	0.0186568
3.6431		0.0286782	0.00817942			0.0639455	0.0217447
3.6532		0.0340945	0.00969218			0.0479052	0.0146761
3.6632		0.0248448	0.00789588			0.0595696	0.0206489
3.6731		0.0269565	0.00750474			0.0494552	0.0151881
3.6832		0.0317973	0.0093561			0.0509624	0.0166507
3.693		0.0237869	0.0067016			0.0560306	0.0187645
3.703		0.0315163	0.00825496			0.0501335	0.0145721
3.7132		0.0296776	0.00776911			0.0472176	0.0141741
3.7231		0.0246859	0.00740948			0.0484396	0.0144575
3.733		0.0334158	0.0100418			0.0523367	0.018578
3.7431		0.0335834	0.00863568			0.0656101	0.0216957
3.753		0.0269845	0.00778425			0.0533761	0.0139897
3.7631		0.0343119	0.011244			0.0504216	0.0150748
3.773		0.0251413	0.00885526			0.0606097	0.0214207
3.783		0.0260767	0.00732433			0.0467304	0.0125156
3.793		0.0352047	0.00945686			0.0487063	0.014028
3.8031		0.0286836	0.00814708			0.0450126	0.0133855
3.8131		0.0311694	0.00962387			0.0544851	0.0154986
3.8229		0.0300029	0.00936824			0.0364412	0.0131801
3.8331		0.0278783	0.0076573			0.0688961	0.0220897
3.843		0.0314518	0.0088645			0.0572538	0.0199413
3.8531		0.0292722	0.00770799			0.0396533	0.0126197
3.863		0.0354212	0.0110854			0.0466021	0.014073
3.8729		0.0232861	0.00654489			0.0534198	0.0161964
3.8831		0.035294	0.00973329			0.0633288	0.0206573
3.8931		0.0352341	0.00945073			0.0541768	0.0149382
3.9031		0.0276984	0.00739308			0.0568863	0.0185022
3.913		0.0310939	0.00910304			0.0435836	0.0138683
3.9231		0.0296015	0.00760909			0.0538977	0.0180848
3.933		0.0283015	0.00768616			0.0584859	0.0167546
3.9431		0.0270052	0.00770621			0.0543402	0.0183221
3.9529		0.0320217	0.0105955			0.0496952	0.0176819
3.9634		0.025043	0.0059674			0.0432966	0.0137118
3.9731		0.0252695	0.0067432			0.046874	0.0148053
3.9831		0.0250044	0.0054498			0.0509876	0.0152616
3.9931		0.0290999	0.0095078			0.0590573	0.019992

## Sheet: 200 Hz DMSO
		Untreated			DMSO
		Avg Resp	SEM		Avg Resp	SEM
1		1	0		1	0
2		0.701561	0.059619		0.810208	0.0599029
3		0.387518	0.0590945		0.514937	0.0514828
4		0.24869	0.0460597		0.345604	0.0387471
5		0.188692	0.0316296		0.256916	0.0268783
6		0.151534	0.0225846		0.204375	0.0170778
7		0.146461	0.0238972		0.186756	0.0172472
8		0.127011	0.0160722		0.163694	0.0140679
9		0.123288	0.0173192		0.150916	0.0123966
10		0.117982	0.0152975		0.143575	0.0120908
		pre-dmso	n=7	6 cells
		dmso	n=11	6 cells
			Stim number	TTEST
			2	0.240634
			3	0.130851
			4	0.131374
			5	0.12491
			6	0.0770248
			7	0.18062
			8	0.112308
			9	0.20193
			10	0.206915
