# Supplementary material for: Active presynaptic ribosomes in the mammalian brain, and altered transmitter release after protein synthesis inhibition
Source: eLife. 2018 Oct 30;7:e36697. doi: 10.7554/eLife.36697 (PMC6231766; doi:10.7554/eLife.36697)
Supplement: Figure 7—figure supplement 1—source data 1. [file elife-36697-fig7-figsupp1-data1.xlsx]

## Sheet: Fig7,supplemental_1a
slope	20.0615	24.4493
slope	22.1711	27.0144
	Cumul Norm			Cumul Norm
	Control			Emetine
time	AVG	SEM control		AVG	SEM emetine
0	1	0		1	0
0.005	1.58476	0.0895873		1.82946	0.0843609
0.01	1.99004	0.170391		2.46588	0.169227
0.015	2.32	0.241285		2.91633	0.233926
0.02	2.58478	0.297707		3.27146	0.283993
0.025	2.82427	0.350701		3.56745	0.329121
0.03	3.03681	0.396714		3.83126	0.36507
0.035	3.21995	0.434212		4.05722	0.396642
0.04	3.39353	0.469105		4.26488	0.42515
0.045	3.56357	0.504682		4.46155	0.451637
0.05	3.7184	0.536297		4.65532	0.482041
0.055	3.86445	0.56512		4.82006	0.50052
0.06	4.00705	0.592582		4.98323	0.519593
0.065	4.14133	0.617959		5.15842	0.543
0.07	4.27616	0.644475		5.31118	0.564525
0.075	4.39891	0.665418		5.45875	0.585876
0.08	4.51514	0.686508		5.60343	0.604738
0.085	4.6309	0.707282		5.74053	0.623863
0.09	4.74848	0.730567		5.87843	0.64149
0.095	4.86277	0.751661		6.01193	0.656228
0.1	4.96983	0.768716		6.13768	0.672658
0.105	5.0655	0.782599		6.26453	0.691274
0.11	5.15865	0.796909		6.38457	0.705129
0.115	5.26139	0.814771		6.50579	0.721704
0.12	5.35381	0.828706		6.63418	0.738177
0.125	5.44976	0.844413		6.75554	0.752047
0.13	5.54077	0.857696		6.87612	0.770015
0.135	5.63363	0.87303		6.98833	0.782252
0.14	5.73169	0.889122		7.09492	0.790791
0.145	5.82754	0.904685		7.20318	0.801678
0.15	5.91401	0.914003		7.31763	0.813971
0.155	6.00281	0.925132		7.432	0.827937
0.16	6.09415	0.937867		7.54062	0.840475
0.165	6.18179	0.948728		7.65212	0.852538
0.17	6.28344	0.965243		7.76077	0.862686
0.175	6.37691	0.978027		7.86997	0.875151
0.18	6.46569	0.988624		7.98118	0.888257
0.185	6.55386	0.997495		8.08577	0.899289
0.19	6.63989	1.00868		8.19346	0.905964
0.195	6.73096	1.02036		8.29913	0.916507
0.2	6.82427	1.03508		8.40627	0.927482
0.205	6.91905	1.04715		8.51376	0.934106
0.21	7.01495	1.06052		8.62313	0.944786
0.215	7.108	1.072		8.72728	0.952136
0.22	7.20741	1.08837		8.83876	0.964209
0.225	7.30299	1.10238		8.95263	0.976255
0.23	7.40032	1.11543		9.05571	0.985954
0.235	7.49753	1.12639		9.16024	0.997277
0.24	7.58945	1.13745		9.26689	1.00643
0.245	7.68383	1.15044		9.38159	1.01913
0.25	7.77659	1.16189		9.48624	1.02638
0.255	7.86794	1.17466		9.59557	1.03403
0.26	7.96522	1.18883		9.70543	1.04781
0.265	8.05677	1.2042		9.81678	1.06063
0.27	8.14931	1.21538		9.93285	1.07044
0.275	8.23989	1.22651		10.0321	1.07685
0.28	8.33816	1.2397		10.1405	1.08974
0.285	8.42762	1.253		10.2475	1.10244
0.29	8.51975	1.26632		10.3556	1.11403
0.295	8.60482	1.27852		10.4593	1.12081
0.3	8.7002	1.29457		10.5686	1.13332
0.305	8.78953	1.30629		10.678	1.14483
0.31	8.88096	1.31822		10.7769	1.15332
0.315	8.96841	1.33083		10.8836	1.16549
0.32	9.05808	1.34521		10.9885	1.17384
0.325	9.14493	1.35615		11.0977	1.18452
0.33	9.22369	1.36672		11.1902	1.19084
0.335	9.31551	1.3803		11.2909	1.20163
0.34	9.40185	1.39044		11.3977	1.21446
0.345	9.50062	1.40543		11.5028	1.22325
0.35	9.59002	1.41828		11.6011	1.23106
0.355	9.67791	1.43097		11.706	1.24427
0.36	9.77155	1.44276		11.8098	1.25473
0.365	9.85291	1.45355		11.916	1.26891
0.37	9.9441	1.46755		12.0153	1.27688
0.375	10.0301	1.47827		12.1166	1.28826
0.38	10.1123	1.48808		12.2256	1.2983
0.385	10.2024	1.49899		12.3287	1.31178
0.39	10.2901	1.51343		12.4194	1.31611
0.395	10.3827	1.52633		12.513	1.32054

## Sheet: Fig7,supplemental_1b
	Pr	Cell#		Pr	Cell#
	0.368609	Control 1		0.267588	Emetine 1
	0.328342	Control 2		0.28523	Emetine 2
	0.305321	Control 3		0.343291	Emetine 3
	0.687491	Control 4		0.336624	Emetine 4
	0.728922	Control 5		0.623664	Emetine 5
	0.423542	Control 6		0.300276	Emetine 6
	0.469111	Control 7		0.366934	Emetine 7
	AVG	0.473048		AVG	0.360515
	SEM	0.0643472		SEM	0.0457967
			TTEST
			0.0461421

## Sheet: Fig7,supplemental_1d
	slope	15.0669	18.558
	slope	15.3216	19.4768
		AVG			AVG of
		Cumul			Cumul
	time (ms)	control	SEM Control		emetine	SEM Emet
	0	1	0		1	0
	0.01	1.54765	0.083573		1.80188	0.105644
	0.02	1.96911	0.171674		2.39905	0.204065
	0.03	2.29724	0.240974		2.8708	0.283105
	0.04	2.59423	0.308821		3.26327	0.349111
	0.05	2.86983	0.374039		3.58224	0.400554
	0.06	3.11871	0.426007		3.89309	0.448302
	0.07	3.34385	0.475316		4.16201	0.496313
	0.08	3.55215	0.517105		4.42717	0.541136
	0.09	3.7556	0.557672		4.67808	0.578011
	0.1	3.95287	0.59949		4.9372	0.622643
	0.11	4.13113	0.633564		5.16427	0.661029
	0.12	4.30432	0.67052		5.39573	0.702853
	0.13	4.48032	0.704465		5.59673	0.732607
	0.14	4.64222	0.73669		5.82415	0.771733
	0.15	4.80179	0.769597		6.03064	0.809629
	0.16	4.95197	0.796501		6.23558	0.842682
	0.17	5.09547	0.821649		6.42721	0.876808
	0.18	5.24283	0.848126		6.62126	0.910992
	0.19	5.38654	0.875792		6.80961	0.943482
	0.2	5.53572	0.89899		6.9918	0.970889
	0.21	5.6903	0.923044		7.18392	0.999463
	0.22	5.83835	0.945442		7.36063	1.02579
	0.23	5.98884	0.972009		7.55225	1.05481
	0.24	6.13186	0.995384		7.72891	1.07986
	0.25	6.28004	1.01771		7.91994	1.10438
	0.26	6.43528	1.03865		8.1012	1.13588
	0.27	6.58646	1.06299		8.27585	1.15929
	0.28	6.73556	1.08518		8.45427	1.18364
	0.29	6.87924	1.11235		8.6459	1.21119
	0.3	7.04123	1.13619		8.83162	1.23848
	0.31	7.20026	1.16321		9.01375	1.26578
	0.32	7.35035	1.18346		9.18456	1.28865
	0.33	7.49955	1.21015		9.35676	1.31353
	0.34	7.65076	1.23614		9.54178	1.33986
	0.35	7.80181	1.26044		9.72698	1.36572
	0.36	7.95291	1.28316		9.90172	1.38859
	0.37	8.0926	1.3014		10.0758	1.41423
	0.38	8.23268	1.31907		10.255	1.44327
	0.39	8.37354	1.33466		10.4132	1.47149

## Sheet: Fig7,supplemental_1e
	Pr	Cell#		Pr	Cell#
	0.345235	Control 1		0.212059	Emetine 1
	0.615236	Control 2		0.582615	Emetine 2
	0.454603	Control 3		0.262723	Emetine 3
	0.69645	Control 4		0.550385	Emetine 4
	0.641663	Control 5		0.277363	Emetine 5
	0.207279	Control 6		0.245741	Emetine 6
	0.291447	Control 7		0.207495	Emetine 7
	AVG	0.464559		AVG	0.334054
	SEM	0.0721013		SEM	0.0608634
			TTEST
			0.0361309
