# Supplementary material for: Active presynaptic ribosomes in the mammalian brain, and altered transmitter release after protein synthesis inhibition
Source: eLife. 2018 Oct 30;7:e36697. doi: 10.7554/eLife.36697 (PMC6231766; doi:10.7554/eLife.36697)
Supplement: Figure 7—source data 1. [file elife-36697-fig7-data1.xlsx]

## Sheet: Fig 7 A1, 100Hz
																ANISO	ANISO	ANISO	ANISO	ANISO	ANISO	ANISO	ANISO			Control	Control	Control	Control	Control	Control	Control	Control	Control
																032917	040617	041717	042517	051617	051817	052517	052517	Cell AVG		032917	040617	041717	042517	051617	051617	051817	052517	052517					Aniso	Control						Aniso	Control
											Aniso	st dev	Control	st dev		C6 AVG_Aniso	c4avg_ANISO	c4avg_ANISO	c4avg_ANISO	C4_AVG_ANISO	C8avg_Aniso	c3AVG_Aniso	c5AVG_ANISO			c6 Control	C2 AVG NORM	C2t9,12,17 AVG	C3 AVG	Control	C3 AVG	C3 AVG	c1t9	C2 trace avg				Event_T	AVG ANISO	AVG CNTRL		Event_T				AVG ANISO	AVG CNTRL
										0	4.61176	1.66459	6.84974	1.67756		2.65592	4.5814	3.59278	7.02495	2.37765	4.81489	5.58005	6.26644	4.61176		8.65521	7.59544	7.45548	9.11895	5.59482	3.67407	6.25604	5.91107	7.3866	6.84974		0	5.0027	4.61176	6.84974	0	0	0.673275			4.61176	6.84974
										0.01	8.57997	0.892785	10.8729	1.24356		2.77084	4.461	3.16587	4.11647	2.88419	4.76424	4.60093	4.98215	3.96821		6.63174	4.25857	2.88235	3.67203	4.37344	2.21557	3.45689	4.6331	4.08515	4.02321		0.01	5.0127	3.96821	4.02321	0.01	0.01	0.98633
										0.02	11.5252	0.920422	13.2796	0.853402		1.73903	4.17573	2.08749	2.54555	2.26765	3.07396	3.80353	3.869	2.94524		3.44382	2.49446	1.47716	1.96529	2.54398	1.36927	1.83778	3.89457	2.6339	2.40669		0.02	5.0227	2.94524	2.40669	0.02	0.02	1.22377
										0.03	13.9231	0.963786	14.9874	0.656471		1.45293	3.5593	1.2747	2.09535	1.34703	2.92173	3.16427	3.36804	2.39792		2.44012	1.88401	1.1065	1.41803	1.6931	0.73526	1.37661	2.87448	1.84154	1.70774		0.03	5.0327	2.39792	1.70774	0.03	0.03	1.40415
										0.04	15.9624	0.93325	16.2964	0.396093		1.11394	3.34064	1.011	1.82418	1.17661	1.96309	2.76667	3.11824	2.0393		1.52143	1.5922	1.01887	1.16849	1.24846	0.637519	1.12355	2.02981	1.44077	1.30901		0.04	5.0427	2.0393	1.30901	0.04	0.04	1.55789
										0.05	17.6879	0.86163	17.4548	0.330242		0.953986	2.41482	0.804224	1.47651	0.842686	1.65834	2.88817	2.76474	1.72544		1.49372	1.15124	0.876781	0.969905	1.16306	0.549597	1.2133	1.63166	1.37632	1.1584		0.05	5.0527	1.72544	1.1584	0.05	0.05	1.4895
										0.06	19.2996	0.749806	18.4804	0.323278		0.917448	2.53685	0.866719	1.53866	0.733504	1.55983	2.13421	2.60684	1.61176		1.17453	1.34978	0.778233	0.805927	0.974614	0.485547	1.002	1.57417	1.08567	1.02561		0.0601	5.0628	1.61176	1.02561	0.06	0.06	1.57152
										0.07	20.7855	0.744209	19.3871	0.221233		0.753907	2.33792	0.656513	1.38905	0.671353	1.5237	2.2919	2.26266	1.48588		1.02187	1.00993	0.771796	0.84721	0.951235	0.469077	0.851112	1.29101	0.946825	0.906675		0.0702	5.0729	1.48588	0.906675	0.07	0.07	1.63882
										0.08	22.1725	0.705533	20.2948	0.218578		0.766116	2.2781	0.541261	1.47915	0.583611	1.34725	1.88471	2.21548	1.38696		0.899845	0.982849	0.846094	0.887621	0.924746	0.473752	0.907834	1.3363	0.910264	0.9077		0.0802	5.0829	1.38696	0.9077	0.08	0.08	1.52799
										0.09	23.4892	0.651753	21.1692	0.223478		0.726981	2.17108	0.586798	1.297	0.625425	1.18524	1.89164	2.04944	1.3167		0.978417	1.11693	0.690969	0.818907	0.890671	0.41062	0.900984	1.14937	0.913122	0.874444		0.0902	5.0929	1.3167	0.874444	0.09	0.09	1.50576
										0.1	24.7875	0.667045	22.0199	0.232437		0.691683	2.14324	0.58983	1.27777	0.545322	1.17466	1.90301	2.06149	1.29838		0.954628	1.01758	0.682377	0.807938	0.842154	0.418339	0.74078	1.24414	0.94823	0.850686		0.1001	5.1028	1.29838	0.850686	0.1	0.1	1.52627
										0.11	25.9743	0.549011	22.7956	0.206057		0.760283	1.77414	0.56012	1.25461	0.531708	1.0799	1.57547	1.95754	1.18672		0.862771	1.07243	0.650523	0.723783	0.76322	0.402361	0.741453	1.0588	0.706258	0.775734		0.1101	5.1128	1.18672	0.775734	0.11	0.11	1.5298
										0.12	27.1312	0.595713	23.514	0.164401		0.626072	2.08901	0.53359	1.17405	0.471731	1.10735	1.5022	1.75151	1.15694		0.916059	0.76787	0.614649	0.641632	0.837883	0.4007	0.804409	0.872335	0.610027	0.718396		0.1201	5.1228	1.15694	0.718396	0.12	0.12	1.61045
										0.13	28.2638	0.556927	24.2229	0.144148		0.589737	1.80647	0.544915	1.1636	0.510846	1.14846	1.36779	1.92878	1.13257		0.847861	0.685366	0.643181	0.723219	0.761123	0.383137	0.826844	0.840931	0.668283	0.708883		0.1301	5.1328	1.13257	0.708883	0.13	0.13	1.59769
										0.14	29.3391	0.5225	24.9364	0.16101		0.598533	1.53887	0.487526	1.08505	0.456337	1.13104	1.46499	1.84027	1.07533		0.765887	0.935225	0.7999	0.705549	0.754873	0.350104	0.709022	0.617241	0.783539	0.713482		0.1402	5.1429	1.07533	0.713482	0.14	0.14	1.50715
										0.15	30.3694	0.493595	25.5933	0.151774		0.620934	1.44206	0.471909	1.08959	0.367085	1.11044	1.46253	1.67831	1.03036		0.768037	0.918661	0.561853	0.662624	0.734839	0.389163	0.582479	0.721062	0.573635	0.656928		0.1502	5.1529	1.03036	0.656928	0.15	0.15	1.56844
										0.16	31.4343	0.535437	26.2491	0.155627		0.603371	1.54458	0.351817	1.1335	0.486209	1.07553	1.62623	1.69772	1.06487		0.701149	0.659009	0.606406	0.60519	0.721426	0.387114	0.660419	0.979439	0.582127	0.655809		0.1602	5.1629	1.06487	0.655809	0.16	0.16	1.62375
		0.07	1.5		15.9736	44.84				0.17	32.5182	0.522473	26.8988	0.13061		0.580276	1.69843	0.508586	1.16388	0.427393	1.13221	1.48866	1.67128	1.08384		0.757614	0.694317	0.620869	0.582501	0.703659	0.366418	0.82677	0.685865	0.608879	0.649655		0.1702	5.1729	1.08384	0.649655	0.17	0.17	1.66833
		3.87	1.38		16.3083	35.015				0.18	33.4876	0.435641	27.5731	0.147559		0.595072	1.39512	0.411971	0.996038	0.477031	0.992615	1.40742	1.48014	0.969426		0.605338	0.867188	0.616374	0.660704	0.732746	0.367263	0.647959	0.838377	0.732477	0.67427		0.1802	5.1829	0.969426	0.67427	0.18	0.18	1.43774
					0	0.3				0.19	34.4294	0.450848	28.1557	0.101996		0.55456	1.25567	0.392976	1.05031	0.413398	0.962736	1.27842	1.62623	0.941787		0.579095	0.690491	0.570998	0.66122	0.676036	0.361517	0.540679	0.52764	0.636185	0.582651		0.1901	5.1928	0.941787	0.582651	0.19	0.19	1.61638
		slope	0.0315789							0.2	35.3917	0.474518	28.7309	0.104531		0.543985	1.43433	0.381192	1.00847	0.409758	1.04248	1.25036	1.62852	0.962385		0.693174	0.56456	0.644279	0.539983	0.66575	0.343094	0.54567	0.63465	0.545344	0.575167		0.2005	5.2032	0.962385	0.575167	0.2	0.2	1.67323
										0.21	36.3479	0.400264	29.3702	0.122749		0.56581	1.30486	0.502678	1.00605	0.437579	1.1452	1.2127	1.47472	0.9562		0.71935	0.774787	0.603011	0.59553	0.656492	0.373669	0.783161	0.607855	0.63978	0.639293		0.2101	5.2128	0.9562	0.639293	0.21	0.21	1.49571
										0.22	37.3187	0.421835	29.9893	0.138194		0.70231	1.47873	0.420392	1.05016	0.437843	0.975202	1.22048	1.48058	0.970712		0.670655	0.8235	0.698582	0.52735	0.706569	0.371116	0.550714	0.710997	0.512614	0.619122		0.2202	5.2229	0.970712	0.619122	0.22	0.22	1.56789
										0.23	38.227	0.41018	30.6187	0.130536		0.549599	1.11329	0.487529	1.02537	0.423373	0.892202	1.14088	1.6341	0.908293		0.662061	0.775448	0.689777	0.671961	0.775846	0.37384	0.65107	0.498025	0.566339	0.629374		0.2302	5.2329	0.908293	0.629374	0.23	0.23	1.44317
										0.24	39.1724	0.475536	31.2525	0.115456		0.472053	1.3262	0.419115	1.01426	0.375866	0.975811	1.4097	1.57093	0.945492		0.679266	0.704617	0.660284	0.595277	0.669181	0.3388	0.673339	0.672408	0.711534	0.633856		0.2403	5.243	0.945492	0.633856	0.24	0.24	1.49165
										0.25	40.1514	0.443814	31.837	0.128496		0.654207	1.40145	0.464054	1.04235	0.411616	1.01009	1.19277	1.65507	0.978949		0.625151	0.800015	0.621225	0.532118	0.691518	0.344414	0.611169	0.540291	0.494288	0.584465		0.2503	5.253	0.978949	0.584465	0.25	0.25	1.67495
										0.26	41.0892	0.432633	32.4741	0.170263		0.576836	1.49973	0.407332	0.966138	0.434538	1.03005	1.11113	1.47642	0.937773		0.703211	0.95868	0.653356	0.599825	0.631987	0.341888	0.612427	0.746481	0.486339	0.637133		0.2602	5.2629	0.937773	0.637133	0.26	0.26	1.47186
										0.27	42.0554	0.420343	33.1158	0.156394		0.550264	1.44157	0.53085	1.04419	0.41815	0.993895	1.32019	1.43073	0.96623		0.757991	0.899812	0.61947	0.627408	0.692865	0.379219	0.743896	0.585466	0.46934	0.641718		0.2701	5.2728	0.96623	0.641718	0.27	0.27	1.50569
										0.28	42.9544	0.367379	33.7647	0.158753		0.592946	1.07897	0.493554	1.00395	0.376109	1.0207	1.23396	1.39183	0.899003		0.702827	0.928954	0.698096	0.541225	0.717997	0.351399	0.558798	0.714645	0.625531	0.64883		0.2802	5.2829	0.899003	0.64883	0.28	0.28	1.38558
										0.29	43.8534	0.358411	34.4223	0.177545		0.680133	1.17776	0.472133	1.06739	0.386697	0.936538	1.04567	1.42592	0.899031		0.610577	0.749147	0.591582	0.653898	0.750526	0.342023	0.993899	0.535956	0.690702	0.65759		0.2903	5.293	0.899031	0.65759	0.29	0.29	1.36716
										0.3	44.8454	0.471584	35.0155	0.176605		0.64668	1.61529	0.472202	1.0358	0.392538	0.912797	1.31365	1.54681	0.991971		0.633765	0.882875	0.629055	0.56193	0.671459	0.338097	0.719001	0.320139	0.58307	0.593266		0.3002	5.3029	0.991971	0.593266	0.3	0.3	1.67205
										0.31	45.7914	0.427209	35.5881	0.130749		0.588383	1.00898	0.472418	0.991078	0.435139	1.09048	1.34176	1.63947	0.945964		0.62922	0.72631	0.678772	0.590945	0.71655	0.333307	0.513301	0.466929	0.497393	0.572525		0.3101	5.3128	0.945964	0.572525	0.31	0.31	1.65227
										0.32	46.7297	0.421889	36.2418	0.140189		0.616023	1.24455	0.39524	1.13118	0.394772	1.00947	1.17848	1.53662	0.938293		0.653459	0.802071	0.65413	0.610159	0.655983	0.34419	0.846718	0.668766	0.648269	0.653749		0.32	5.3227	0.938293	0.653749	0.32	0.32	1.43525
										0.33	47.5881	0.374212	36.8663	0.108369		0.596766	1.14552	0.364468	0.996218	0.413796	0.865492	1.0515	1.43405	0.858477		0.673283	0.683112	0.616725	0.53944	0.690998	0.374987	0.736451	0.65668	0.648829	0.624501		0.3301	5.3328	0.858477	0.624501	0.33	0.33	1.37466
										0.34	48.508	0.427626	37.5421	0.185922		0.505759	0.927332	0.489739	1.01243	0.419239	1.10296	1.26722	1.63409	0.919847		0.663798	1.05544	0.652878	0.576905	0.703361	0.35464	0.631684	0.798846	0.644726	0.675809		0.3401	5.3428	0.919847	0.675809	0.34	0.34	1.3611
										0.35	49.4389	0.419839	38.2003	0.154639		0.553227	1.56141	0.543522	1.03736	0.358282	0.902875	1.19009	1.30026	0.930877		0.720388	0.876647	0.71708	0.596702	0.676674	0.312146	0.67723	0.74937	0.597361	0.658178		0.3502	5.3529	0.930877	0.658178	0.35	0.35	1.41432
										0.36	50.3822	0.40743	38.8528	0.135477		0.599248	1.16327	0.477796	1.00881	0.405141	1.09658	1.24287	1.55273	0.943305		0.628715	0.760172	0.704744	0.674521	0.640811	0.356593	0.835526	0.56597	0.70518	0.65247		0.3602	5.3629	0.943305	0.65247	0.36	0.36	1.44574
										0.37	51.3107	0.42284	39.4748	0.125538		0.646379	1.26122	0.438355	0.967868	0.373556	0.973818	1.16495	1.60196	0.928512		0.602769	0.805763	0.636605	0.686348	0.669182	0.342923	0.593704	0.573152	0.687493	0.621993		0.3701	5.3728	0.928512	0.621993	0.37	0.37	1.4928
										0.38	52.2209	0.419104	40.125	0.170187		0.570773	1.29586	0.394671	0.957278	0.419631	0.892233	1.26741	1.48381	0.910208		0.632125	0.810794	0.562211	0.573876	0.692649	0.331178	0.610544	0.94108	0.697762	0.650247		0.3803	5.383	0.910208	0.650247	0.38	0.38	1.39979
										0.39	53.1018	0.36263	40.7972	0.180312		0.507629	0.975949	0.529307	1.08832	0.386485	1.03441	1.11114	1.41426	0.880938		0.690553	0.906364	0.585907	0.635134	0.670641	0.337256	0.614282	0.955483	0.654425	0.672227		0.3902	5.3929	0.880938	0.672227	0.39	0.39	1.31048
										0.4	54.0132	0.357468	41.4173	0.122468		0.579834	1.19438	0.516604	1.03629	0.460805	0.932169	1.1276	1.44319	0.911359		0.590135	0.798513	0.659738	0.63464	0.656479	0.345013	0.577487	0.70165	0.616556	0.620023		0.4005	5.4032	0.911359	0.620023	0.4	0.4	1.46988
										0.41	54.9611	0.378951	42.0727	0.151246		0.594362	1.17129	0.473709	1.06963	0.442343	1.25002	1.22563	1.35614	0.94789		0.667946	0.930677	0.623021	0.620155	0.640609	0.350228	0.689701	0.75197	0.624963	0.655474		0.4102	5.4129	0.94789	0.655474	0.41	0.41	1.44611
										0.42	55.8747	0.459171	42.6849	0.114713		0.556966	1.41692	0.36909	1.0002	0.351272	0.878585	1.19364	1.54248	0.913644		0.591884	0.728396	0.625518	0.531338	0.655252	0.357941	0.610482	0.728657	0.679841	0.612145		0.4201	5.4228	0.913644	0.612145	0.42	0.42	1.49253
										0.43	56.7773	0.438908	43.298	0.133988		0.471257	1.35198	0.384494	1.02881	0.366881	1.00199	1.14787	1.46748	0.902594		0.649079	0.819931	0.572181	0.652758	0.63696	0.341235	0.516427	0.605247	0.724518	0.613148		0.4302	5.4329	0.902594	0.613148	0.43	0.43	1.47207
										0.44	57.7283	0.422741	43.9573	0.170239		0.59015	1.01985	0.465007	1.03106	0.411655	1.2288	1.28005	1.58114	0.950964		0.718226	0.750895	0.585491	0.496115	0.67022	0.340423	0.785084	0.924391	0.663007	0.659317		0.4403	5.443	0.950964	0.659317	0.44	0.44	1.44235
										0.45	58.6221	0.372623	44.5953	0.148587		0.609984	1.10354	0.458507	0.983258	0.358052	1.10044	1.12712	1.40931	0.893775		0.650852	0.715694	0.650844	0.593125	0.633029	0.324173	0.837309	0.787165	0.549924	0.638013		0.4502	5.4529	0.893775	0.638013	0.45	0.45	1.40087
										0.46	59.4785	0.360947	45.2266	0.142467		0.565936	1.0336	0.461767	1.03248	0.366467	0.907255	1.05548	1.42843	0.856427		0.722473	0.759052	0.629599	0.63062	0.652144	0.337546	0.763885	0.469338	0.71617	0.631203		0.4601	5.4628	0.856427	0.631203	0.46	0.46	1.35682
										0.47	60.4317	0.421976	45.8519	0.125881		0.704256	1.22635	0.438745	1.026	0.365454	1.00941	1.28551	1.57034	0.953259		0.597712	0.695794	0.64911	0.549153	0.666575	0.344347	0.723993	0.7811	0.620694	0.625386		0.4702	5.4729	0.953259	0.625386	0.47	0.47	1.52427
										0.48	61.2867	0.424808	46.4708	0.136768		0.499251	1.17871	0.35945	0.82447	0.360151	0.921584	1.18948	1.5063	0.854925		0.606139	0.736928	0.601894	0.586336	0.647861	0.350948	0.85728	0.551207	0.631381	0.618886		0.4804	5.4831	0.854925	0.618886	0.48	0.48	1.38139
										0.49	62.2155	0.461252	47.0789	0.100083		0.5294	1.64275	0.508018	0.788146	0.403504	0.940259	1.14026	1.47871	0.928881		0.628154	0.748688	0.635898	0.623662	0.634688	0.367796	0.603645	0.628935	0.601497	0.608107		0.4902	5.4929	0.928881	0.608107	0.49	0.49	1.5275
										0.5	63.0655	0.380225	47.6644	0.154604		0.52046	1.17892	0.440629	0.932318	0.380986	0.815005	1.10183	1.42986	0.850001		0.543447	0.751379	0.658975	0.595592	0.664185	0.358998	0.794427	0.35321	0.549022	0.58547		0.5002	5.5029	0.850001	0.58547	0.5	0.5	1.45183
										0.51	63.9955	0.430917	48.2965	0.147617		0.494456	1.26424	0.48648	0.998388	0.346282	1.18392	1.15022	1.51594	0.929991		0.618248	0.776809	0.541856	0.596087	0.626472	0.337856	0.768876	0.825056	0.59743	0.632077		0.5101	5.5128	0.929991	0.632077	0.51	0.51	1.47133
										0.52	64.9037	0.412045	48.9049	0.11761		0.606695	1.41804	0.435962	0.966758	0.372208	0.897839	1.13918	1.42823	0.908115		0.558779	0.688185	0.588462	0.556112	0.616188	0.3525	0.710256	0.75288	0.652021	0.608376		0.5201	5.5228	0.908115	0.608376	0.52	0.52	1.49269
										0.53	65.7393	0.37689	49.5318	0.155199		0.521862	0.952576	0.35384	1.02863	0.391696	0.890307	1.15024	1.39579	0.835617		0.521132	0.891738	0.701965	0.619452	0.666896	0.332605	0.70904	0.667722	0.531738	0.626921		0.5302	5.5329	0.835617	0.626921	0.53	0.53	1.33289
										0.54	66.686	0.432273	50.1143	0.12524		0.531414	1.24182	0.447506	0.972388	0.423731	1.22077	1.15041	1.58584	0.946736		0.521943	0.803604	0.591226	0.516192	0.654735	0.355546	0.52698	0.674143	0.598226	0.582511		0.5401	5.5428	0.946736	0.582511	0.54	0.54	1.62527
										0.55	67.5746	0.383857	50.733	0.176519		0.630458	1.33522	0.4175	1.02973	0.33714	0.958368	1.09934	1.301	0.888594		0.530466	0.801728	0.557433	0.538304	0.623159	0.347516	0.568148	0.967146	0.63418	0.618675		0.5504	5.5531	0.888594	0.618675	0.55	0.55	1.43629
										0.56	68.4333	0.409758	51.3494	0.185506		0.506203	0.952429	0.330092	1.04842	0.360624	1.05487	1.17511	1.44194	0.858712		0.559648	0.927397	0.664991	0.466277	0.609124	0.307548	0.684712	0.815579	0.513058	0.616482		0.5601	5.5628	0.858712	0.616482	0.56	0.56	1.39292
										0.57	69.2992	0.376553	51.9797	0.154037		0.521241	1.18896	0.457515	0.965688	0.379062	0.88854	1.1226	1.4037	0.865914		0.573481	0.925854	0.628431	0.584927	0.64683	0.337723	0.646083	0.730594	0.59877	0.630299		0.5703	5.573	0.865914	0.630299	0.57	0.57	1.37381
										0.58	70.2268	0.426588	52.5911	0.128039		0.540935	1.22684	0.396685	1.00086	0.380492	1.21381	1.18557	1.4751	0.927536		0.590544	0.760601	0.58602	0.553074	0.655435	0.325011	0.662279	0.744362	0.625014	0.611371		0.5802	5.5829	0.927536	0.611371	0.58	0.58	1.51714
										0.59	71.0604	0.380909	53.2179	0.150533		0.558611	1.10559	0.323703	0.981108	0.337092	0.885414	1.18181	1.29602	0.833669		0.564123	0.808253	0.652257	0.533732	0.636557	0.338604	0.849815	0.662291	0.595667	0.626811		0.5902	5.5929	0.833669	0.626811	0.59	0.59	1.33002
										0.6	71.9386	0.458161	53.8444	0.20898		0.511458	1.27369	0.398671	0.885274	0.351844	0.837443	1.10115	1.66563	0.878146		0.629215	0.880896	0.612282	0.540455	0.673857	0.329542	1.00511	0.449207	0.517661	0.626469		0.6003	5.603	0.878146	0.626469	0.6	0.6	1.40174
										0.61	72.8243	0.410625	54.4396	0.123757		0.547472	1.37432	0.434621	0.946998	0.348869	0.931478	1.07375	1.42817	0.885709		0.557516	0.734717	0.623628	0.526352	0.625217	0.317231	0.713398	0.601134	0.657803	0.595222		0.6104	5.6131	0.885709	0.595222	0.61	0.61	1.48803
										0.62	73.711	0.399562	55.0324	0.136748		0.516387	1.25334	0.437229	0.940118	0.392466	0.91843	1.20883	1.42713	0.886742		0.578122	0.819979	0.580847	0.564684	0.620346	0.31136	0.629887	0.700187	0.529823	0.592804		0.6204	5.6231	0.886742	0.592804	0.62	0.62	1.49584
										0.63	74.5735	0.379749	55.6324	0.142969		0.627353	1.0026	0.400243	0.949178	0.352337	0.899723	1.27612	1.39224	0.862474		0.572867	0.790611	0.596214	0.54422	0.590633	0.332998	0.56691	0.580314	0.824649	0.599935		0.6302	5.6329	0.862474	0.599935	0.63	0.63	1.43761
										0.64	75.4614	0.402012	56.3043	0.189282		0.573789	1.35064	0.402741	1.03048	0.407006	0.806874	1.12567	1.40601	0.887901		0.545376	0.75759	0.597261	0.624768	0.617755	0.358982	1.01619	0.86184	0.667641	0.671933		0.6403	5.643	0.887901	0.671933	0.64	0.64	1.32141
										0.65	76.3338	0.335404	56.8759	0.106687		0.580474	1.23111	0.508743	0.858471	0.420873	1.01377	1.07229	1.29349	0.872403		0.57466	0.718336	0.577244	0.540823	0.629182	0.327417	0.645437	0.559614	0.571809	0.571614		0.6503	5.653	0.872403	0.571614	0.65	0.65	1.52621
										0.66	77.2059	0.393342	57.4278	0.1048		0.60478	1.42393	0.450865	0.897738	0.354124	0.81935	1.09976	1.32601	0.87207		0.566743	0.710211	0.571709	0.545518	0.635626	0.324462	0.530729	0.577903	0.504089	0.551888		0.6602	5.6629	0.87207	0.551888	0.66	0.66	1.58016
										0.67	78.0788	0.394194	58.036	0.133319		0.520223	1.14681	0.389645	0.907564	0.367032	1.06744	1.22832	1.35612	0.872895		0.560149	0.782789	0.590129	0.609152	0.597904	0.342766	0.588662	0.803264	0.599259	0.60823		0.6701	5.6728	0.872895	0.60823	0.67	0.67	1.43514
										0.68	78.9744	0.429628	58.5988	0.1157		0.505052	1.29344	0.393994	0.893212	0.348934	1.08354	1.20194	1.44481	0.895616		0.614558	0.68343	0.625382	0.515747	0.615056	0.337323	0.519505	0.458729	0.694921	0.562739		0.6801	5.6828	0.895616	0.562739	0.68	0.68	1.59153
										0.69	79.8432	0.399551	59.1993	0.132877		0.54561	1.20752	0.376942	0.936398	0.382091	0.906628	1.14607	1.44898	0.868781		0.54903	0.82147	0.586269	0.568577	0.607668	0.320561	0.676616	0.60835	0.665923	0.600496		0.6902	5.6929	0.868781	0.600496	0.69	0.69	1.44677
										0.7	80.6811	0.367515	59.766	0.137424		0.480999	1.03854	0.404173	0.883864	0.435705	0.889803	1.17722	1.39289	0.837899		0.49437	0.818131	0.584383	0.625072	0.611519	0.306881	0.599328	0.477052	0.58392	0.56674		0.7002	5.7029	0.837899	0.56674	0.7	0.7	1.47846
										0.71	81.5219	0.368929	60.3448	0.104978		0.547929	1.22448	0.457182	0.874986	0.347088	0.820509	1.10784	1.34674	0.840844		0.554168	0.678093	0.576055	0.58722	0.608197	0.316373	0.620509	0.632163	0.636244	0.57878		0.7102	5.7129	0.840844	0.57878	0.71	0.71	1.45279
										0.72	82.3899	0.423713	60.9544	0.130381		0.461079	1.25833	0.36489	0.945428	0.352027	0.97706	1.14956	1.43569	0.868009		0.561624	0.714753	0.531378	0.544176	0.636868	0.339138	0.702157	0.700929	0.756005	0.60967		0.7201	5.7228	0.868009	0.60967	0.72	0.72	1.42374
										0.73	83.2389	0.414391	61.5326	0.141595		0.626467	1.38906	0.391049	0.860041	0.330417	0.765758	0.98256	1.44676	0.849014		0.530726	0.807847	0.618032	0.514553	0.608719	0.330499	0.681598	0.442097	0.6691	0.57813		0.7302	5.7329	0.849014	0.57813	0.73	0.73	1.46855
										0.74	84.0856	0.382603	62.1358	0.137893		0.510842	1.12269	0.428757	0.813291	0.352587	0.966439	1.22061	1.3582	0.846678		0.600594	0.869643	0.592678	0.51933	0.63136	0.353277	0.682164	0.635236	0.544404	0.603187		0.7404	5.7431	0.846678	0.603187	0.74	0.74	1.40367
										0.75	84.8753	0.297304	62.7132	0.125196		0.479994	0.985169	0.429876	0.969568	0.411059	0.894757	1.01289	1.13402	0.789666		0.525315	0.789769	0.61358	0.567528	0.64165	0.330898	0.66291	0.532858	0.532852	0.577484		0.7502	5.7529	0.789666	0.577484	0.75	0.75	1.36742
										0.76	85.7037	0.351948	63.2691	0.11489		0.524145	1.14924	0.399718	0.822479	0.362774	1.05056	1.12283	1.1957	0.828431		0.515392	0.672871	0.55058	0.53717	0.567787	0.337157	0.756956	0.51867	0.546069	0.55585		0.7601	5.7628	0.828431	0.55585	0.76	0.76	1.49039
										0.77	86.5885	0.431522	63.8415	0.102821		0.508008	1.1713	0.397275	0.923153	0.361818	1.08178	1.04075	1.59448	0.884821		0.650636	0.67055	0.598225	0.555929	0.596767	0.315109	0.601179	0.57499	0.588438	0.572425		0.7702	5.7729	0.884821	0.572425	0.77	0.77	1.54574
										0.78	87.4857	0.425172	64.4395	0.148261		0.472555	1.34085	0.481663	0.919709	0.313793	1.15036	1.0715	1.42657	0.897125		0.531892	0.896278	0.585341	0.565619	0.601734	0.321516	0.631081	0.658625	0.589327	0.597935		0.7801	5.7828	0.897125	0.597935	0.78	0.78	1.50037
										0.79	88.3355	0.387974	65.0191	0.115869		0.731826	1.19478	0.388511	0.935778	0.345376	0.664763	1.09432	1.44317	0.849815		0.57218	0.728481	0.557715	0.53761	0.602796	0.315736	0.61988	0.598567	0.683509	0.579608		0.7902	5.7929	0.849815	0.579608	0.79	0.79	1.46619
										0.8	89.1912	0.380652	65.5881	0.107877		0.614461	0.9498	0.342823	0.991238	0.354572	1.11044	1.07917	1.40328	0.855724		0.465533	0.688169	0.606248	0.554539	0.615566	0.334847	0.647881	0.582909	0.62544	0.569015		0.8004	5.8031	0.855724	0.569015	0.8	0.8	1.50387
										0.81	90.0407	0.391041	66.2107	0.153537		0.548376	1.31377	0.341473	0.865649	0.356001	1.00819	1.08869	1.27362	0.849472		0.543824	0.796539	0.600437	0.546812	0.612139	0.322218	0.844297	0.701522	0.635873	0.622629		0.8103	5.813	0.849472	0.622629	0.81	0.81	1.36433
										0.82	90.9178	0.389006	66.7863	0.164763		0.577402	1.26863	0.428582	1.0045	0.332158	0.995755	1.01455	1.39559	0.877145		0.482481	0.824561	0.612219	0.527599	0.625027	0.334919	0.823601	0.494408	0.455557	0.575597		0.8202	5.8229	0.877145	0.575597	0.82	0.82	1.52389
										0.83	91.6756	0.334956	67.3184	0.111863		0.42725	0.922781	0.393236	0.801569	0.35117	0.823099	1.13879	1.20423	0.757766		0.504229	0.597161	0.591583	0.469316	0.577325	0.317784	0.628	0.429949	0.673552	0.5321		0.8303	5.833	0.757766	0.5321	0.83	0.83	1.4241
										0.84	92.4509	0.361534	67.9145	0.127436		0.496054	0.964241	0.363198	0.934008	0.339504	0.767611	0.938487	1.39952	0.775327		0.646951	0.763069	0.547877	0.628156	0.604346	0.309034	0.589966	0.708952	0.566879	0.596137		0.8402	5.8429	0.775327	0.596137	0.84	0.84	1.30059
										0.85	93.3237	0.396081	68.4469	0.136165		0.537697	1.30022	0.351555	0.974688	0.367166	1.01443	1.15974	1.27658	0.872761		0.514589	0.733652	0.574121	0.584553	0.595616	0.364759	0.594935	0.274451	0.554732	0.532378		0.8502	5.8529	0.872761	0.532378	0.85	0.85	1.63936
										0.86	94.173	0.374569	69.0029	0.135789		0.637112	1.14277	0.454327	0.827312	0.300236	0.877903	1.16453	1.39042	0.849328		0.484841	0.807695	0.525022	0.538033	0.588874	0.311451	0.662296	0.594388	0.491541	0.556016		0.8601	5.8628	0.849328	0.556016	0.86	0.86	1.52752
										0.87	95.0327	0.431967	69.5847	0.116128		0.495785	1.37564	0.278411	0.929214	0.380479	0.928337	1.11534	1.37457	0.859722		0.539447	0.639916	0.602445	0.533202	0.639458	0.340224	0.718387	0.705913	0.517125	0.581791		0.8704	5.8731	0.859722	0.581791	0.87	0.87	1.47772
										0.88	95.8484	0.361503	70.1502	0.120298		0.546648	0.965347	0.383458	0.919255	0.381997	0.857376	1.03617	1.43539	0.815705		0.54656	0.77993	0.622748	0.561876	0.611315	0.324172	0.563786	0.492214	0.586275	0.565431		0.8802	5.8829	0.815705	0.565431	0.88	0.88	1.44263
										0.89	96.6946	0.392467	70.6818	0.116939		0.477349	1.36494	0.438742	0.986578	0.348836	0.874844	0.955335	1.3229	0.84619		0.543762	0.695288	0.570455	0.599007	0.639677	0.350438	0.450352	0.375242	0.560821	0.531671		0.8902	5.8929	0.84619	0.531671	0.89	0.89	1.59157
										0.9	97.5027	0.355095	71.1958	0.0934162		0.602019	1.13787	0.355933	0.867035	0.334207	0.846796	1.00395	1.31709	0.808112		0.484401	0.613142	0.614169	0.461634	0.580236	0.323609	0.577456	0.4809	0.490054	0.513956		0.9002	5.9029	0.808112	0.513956	0.9	0.9	1.57234
										0.91	98.3185	0.340205	71.7336	0.0950016		0.51071	1.17327	0.427449	0.807204	0.388802	0.903515	1.07167	1.24351	0.815766		0.569496	0.557198	0.586458	0.49421	0.612758	0.328374	0.638578	0.584251	0.468791	0.53779		0.9102	5.9129	0.815766	0.53779	0.91	0.91	1.51688
										0.92	99.1172	0.341045	72.2939	0.11743		0.484181	1.11791	0.365341	0.893324	0.385859	0.856087	1.0933	1.19379	0.798723		0.45506	0.711721	0.571978	0.539129	0.598849	0.326984	0.54071	0.691678	0.606818	0.560325		0.9203	5.923	0.798723	0.560325	0.92	0.92	1.42546
										0.93	99.9458	0.37378	72.8692	0.105754		0.45384	1.11519	0.4209	1.07632	0.338624	0.897904	0.990446	1.3353	0.828565		0.522246	0.69159	0.573221	0.668235	0.608096	0.349353	0.551324	0.67684	0.536837	0.575305		0.9302	5.9329	0.828565	0.575305	0.93	0.93	1.44022
										0.94	100.804	0.394479	73.4551	0.147617		0.495555	1.21672	0.39516	0.869539	0.387613	1.0313	1.03432	1.43464	0.858105		0.553861	0.788982	0.535068	0.495876	0.592711	0.309588	0.794392	0.624059	0.578896	0.585937		0.9405	5.9432	0.858105	0.585937	0.94	0.94	1.4645
										0.95	101.653	0.348329	74.0574	0.135184		0.628113	1.03509	0.453736	0.84692	0.343872	1.0313	1.09159	1.36128	0.848989		0.680946	0.808363	0.572316	0.51714	0.605183	0.331853	0.717744	0.556287	0.630667	0.602278		0.9502	5.9529	0.848989	0.602278	0.95	0.95	1.40963
										0.96	102.437	0.346181	74.6262	0.155038		0.548446	1.01083	0.372996	0.90383	0.366961	0.67226	1.09653	1.29838	0.783779		0.429555	0.728864	0.597539	0.608849	0.585645	0.327496	0.531354	0.842112	0.467605	0.56878		0.9602	5.9629	0.783779	0.56878	0.96	0.96	1.378
										0.97	103.309	0.385008	75.2265	0.130044		0.580317	1.16533	0.372664	0.914414	0.379244	1.11914	1.04552	1.40244	0.872384		0.552294	0.658488	0.661885	0.485128	0.613598	0.329051	0.666018	0.775964	0.660426	0.600317		0.9703	5.973	0.872384	0.600317	0.97	0.97	1.45321
										0.98	104.139	0.388748	75.746	0.106587		0.436822	1.15674	0.382172	0.959468	0.329586	1.01384	1.02598	1.33655	0.830145		0.510838	0.675495	0.610483	0.489805	0.603314	0.306402	0.461557	0.534267	0.48336	0.519502		0.9803	5.983	0.830145	0.519502	0.98	0.98	1.59796
										0.99	104.97	0.313814	76.295	0.119627		0.598344	1.14391	0.472373	0.877428	0.353636	1.03752	1.01394	1.15123	0.831049		0.501859	0.689735	0.507146	0.459719	0.59085	0.322517	0.538808	0.701239	0.629049	0.548991		0.9902	5.9929	0.831049	0.548991	0.99	0.99	1.51377
										1	105.756	0.373092	76.8747	0.147458		0.432894	1.06184	0.344225	0.860197	0.339273	0.882088	1.02366	1.34067	0.785606		0.50742	0.833429	0.563109	0.59273	0.561751	0.315331	0.751845	0.575948	0.516135	0.579744		1.0002	6.0029	0.785606	0.579744	1	1	1.35509
										1.01	106.563	0.361607	77.4441	0.115515		0.598464	0.984521	0.333957	0.910197	0.337067	0.846672	1.09135	1.35712	0.807418		0.572544	0.750514	0.541719	0.495653	0.602792	0.325526	0.588098	0.644614	0.603102	0.569396			6.0131	0.807418	0.569396	1.01	1.01	1.41803
										1.02	107.389	0.369719	78.0292	0.141764		0.542623	1.34631	0.39002	0.910525	0.329249	0.919723	0.982132	1.18471	0.825662		0.467329	0.848055	0.581038	0.583484	0.593342	0.316928	0.646072	0.626699	0.602683	0.58507			6.0231	0.825662	0.58507	1.02	1.02	1.41122
										1.03	108.222	0.364068	78.5665	0.127531		0.565823	1.11002	0.440722	0.835366	0.304186	0.930315	1.16789	1.30686	0.832648		0.45855	0.726228	0.601337	0.566635	0.640295	0.358893	0.634831	0.370554	0.47811	0.53727			6.0327	0.832648	0.53727	1.03	1.03	1.54977
										1.04	108.994	0.336461	79.0969	0.104711		0.48823	1.13178	0.312047	0.901804	0.392169	0.78439	1.00809	1.16432	0.772853		0.474614	0.693864	0.569072	0.533281	0.573706	0.32457	0.46968	0.620906	0.514313	0.530445			6.043	0.772853	0.530445	1.04	1.04	1.45699
										1.05	109.791	0.350951	79.6598	0.125613		0.494195	1.08705	0.348027	0.953488	0.359163	0.844875	1.02994	1.25746	0.796775		0.492194	0.766286	0.598097	0.452323	0.616387	0.335912	0.656042	0.535226	0.613614	0.562898			6.0529	0.796775	0.562898	1.05	1.05	1.41549
										1.06	110.595	0.37652	80.2044	0.146075		0.518296	1.2413	0.368844	0.89626	0.307965	0.77947	1.05299	1.26551	0.803829		0.452317	0.784375	0.600511	0.510372	0.592201	0.327805	0.705892	0.386153	0.541429	0.544562			6.0633	0.803829	0.544562	1.06	1.06	1.4761
										1.07	111.375	0.323707	80.7543	0.112182		0.505819	1.00269	0.355164	0.994648	0.342235	0.886061	1.05423	1.10263	0.780435		0.471641	0.606379	0.661382	0.525307	0.610068	0.30684	0.613672	0.647951	0.505722	0.549885			6.0732	0.780435	0.549885	1.07	1.07	1.41927
										1.08	112.223	0.37897	81.3128	0.123634		0.648517	1.00215	0.316538	0.917477	0.348176	0.98206	1.21644	1.34896	0.847538		0.472383	0.806228	0.515886	0.510376	0.592822	0.350012	0.614301	0.566566	0.597752	0.558481			6.0828	0.847538	0.558481	1.08	1.08	1.51758
										1.09	113.01	0.327097	81.9043	0.147047		0.483496	1.02736	0.409578	0.78867	0.345534	1.05863	1.04903	1.13236	0.786833		0.502276	0.795064	0.54323	0.596293	0.615156	0.335518	0.819869	0.538546	0.577799	0.591528			6.0929	0.786833	0.591528	1.09	1.09	1.33017
										1.1	113.794	0.367583	82.4854	0.123804		0.463773	1.02205	0.38705	0.775863	0.31104	0.899762	1.08396	1.33346	0.78462		0.558962	0.730692	0.584305	0.587957	0.581271	0.301374	0.685975	0.669532	0.529834	0.5811			6.1029	0.78462	0.5811	1.1	1.1	1.35023
										1.11	114.555	0.34162	83.005	0.116093		0.557293	0.939018	0.3277	0.857228	0.342624	0.719625	1.03407	1.30453	0.760261		0.517327	0.441972	0.517755	0.518091	0.582639	0.30392	0.67598	0.450443	0.668107	0.519581			6.1131	0.760261	0.519581	1.11	1.11	1.46322
										1.12	115.352	0.339089	83.4955	0.160892		0.518692	1.02691	0.360616	0.826676	0.373608	0.920965	1.17861	1.17515	0.797653		0.463587	0.72347	0.565545	0.512159	0.575267	0.333572	0.500215	0.16404	0.577145	0.490555			6.123	0.797653	0.490555	1.12	1.12	1.62602
										1.13	116.168	0.369949	84.0635	0.131865		0.532338	1.03109	0.373169	0.864529	0.327067	0.985175	1.03448	1.37942	0.815909		0.459977	0.666997	0.528065	0.572053	0.609861	0.33182	0.804912	0.603324	0.534583	0.567955			6.133	0.815909	0.567955	1.13	1.13	1.43657
										1.14	116.984	0.356302	84.6439	0.138292		0.498166	1.1537	0.362924	0.903019	0.341651	1.05736	1.03919	1.17331	0.816166		0.548729	0.796239	0.620251	0.506483	0.571222	0.343858	0.770741	0.504587	0.561914	0.580447			6.1429	0.816166	0.580447	1.14	1.14	1.4061
										1.15	117.788	0.353985	85.1616	0.102984		0.509882	1.1321	0.353521	0.898836	0.31764	1.00625	1.02391	1.18511	0.803407		0.568307	0.56341	0.580225	0.494863	0.636041	0.330965	0.621121	0.404217	0.460114	0.517696			6.1528	0.803407	0.517696	1.15	1.15	1.55189
										1.16	118.583	0.353339	85.68	0.108207		0.548688	1.09703	0.343432	0.902414	0.318339	0.839251	1.07417	1.24165	0.795622		0.47621	0.546777	0.524262	0.469481	0.591156	0.308915	0.465297	0.697586	0.585873	0.518395			6.1628	0.795622	0.518395	1.16	1.16	1.53478
										1.17	119.368	0.355855	86.2775	0.169684		0.573149	1.30491	0.367884	0.815466	0.320002	0.828096	0.865601	1.19943	0.784318		0.491276	0.727461	0.562008	0.502582	0.602152	0.328261	0.611715	0.942537	0.609057	0.59745			6.1729	0.784318	0.59745	1.17	1.17	1.31278
										1.18	120.117	0.341074	86.8574	0.147872		0.54569	0.948952	0.305964	0.856284	0.290211	0.848028	0.931046	1.27032	0.749562		0.535529	0.772856	0.578071	0.603565	0.585645	0.3227	0.791299	0.42594	0.604119	0.579969			6.183	0.749562	0.579969	1.18	1.18	1.29242
										1.19	120.893	0.317996	87.3862	0.0944301		0.522379	1.06977	0.425185	0.81718	0.331794	0.824346	1.0243	1.1897	0.775582		0.463844	0.625094	0.55384	0.509597	0.595102	0.322875	0.614256	0.573298	0.501144	0.528783			6.193	0.775582	0.528783	1.19	1.19	1.46673
										1.2	121.646	0.322863	87.91	0.113887		0.495776	0.850973	0.362922	0.894924	0.327977	0.942696	0.904592	1.24494	0.753101		0.411305	0.62062	0.532219	0.460649	0.630639	0.328373	0.556922	0.684315	0.489092	0.523793			6.2029	0.753101	0.523793	1.2	1.2	1.43778
										1.21	122.437	0.358824	88.4498	0.104284		0.535494	1.06164	0.354755	0.810327	0.321479	0.888516	1.02659	1.32636	0.790645		0.555227	0.66115	0.533057	0.45825	0.608407	0.309645	0.62422	0.546377	0.562024	0.539817			6.2133	0.790645	0.539817	1.21	1.21	1.46465
										1.22	123.33	0.416721	88.9795	0.107061		0.573496	1.41199	0.407197	0.923902	0.357244	1.11358	0.950353	1.4109	0.893584		0.449573	0.709342	0.610616	0.495883	0.605079	0.336109	0.545712	0.528351	0.486162	0.529647			6.223	0.893584	0.529647	1.22	1.22	1.68713
										1.23	124.136	0.382034	89.5021	0.109315		0.475731	1.25305	0.334382	0.950408	0.35542	0.742044	1.15249	1.18319	0.805839		0.471699	0.68643	0.57593	0.581271	0.561234	0.314119	0.588715	0.421844	0.502557	0.522644			6.2329	0.805839	0.522644	1.23	1.23	1.54185
										1.24	124.872	0.338432	90.0451	0.107313		0.532427	1.06447	0.320314	0.909353	0.295693	0.661042	0.895262	1.21005	0.736076		0.517141	0.695261	0.539919	0.532967	0.590849	0.376919	0.684723	0.408074	0.54124	0.54301			6.2432	0.736076	0.54301	1.24	1.24	1.35555
										1.25	125.634	0.310716	90.6075	0.134876		0.536116	0.961426	0.388791	0.782745	0.313613	1.03185	0.942436	1.13466	0.761455		0.532212	0.821017	0.573291	0.524006	0.580041	0.318426	0.674087	0.511828	0.526618	0.562392			6.253	0.761455	0.562392	1.25	1.25	1.35396
										1.26	126.357	0.311948	91.1211	0.0997321		0.42226	1.01298	0.385655	0.711844	0.350414	0.799421	0.925421	1.17807	0.723258		0.456785	0.57949	0.610426	0.517683	0.597393	0.326737	0.603666	0.40245	0.527928	0.513618			6.2632	0.723258	0.513618	1.26	1.26	1.40816
										1.27	127.127	0.33192	91.7057	0.149646		0.51915	0.950725	0.406672	0.791779	0.32699	0.836166	1.04905	1.28441	0.770619		0.511955	0.669382	0.514077	0.55214	0.553861	0.319143	0.744556	0.835725	0.560152	0.584555			6.2729	0.770619	0.584555	1.27	1.27	1.3183
										1.28	127.904	0.352441	92.2511	0.109698		0.475364	1.22117	0.375985	0.838999	0.350651	0.722749	1.05112	1.17288	0.776115		0.479668	0.7201	0.527171	0.610713	0.570268	0.336085	0.490222	0.641342	0.533138	0.545412			6.283	0.776115	0.545412	1.28	1.28	1.42299
										1.29	128.696	0.327801	92.7796	0.120609		0.464096	0.95801	0.447565	0.882938	0.344069	1.06181	0.957215	1.22727	0.792872		0.491833	0.71794	0.519696	0.574325	0.640711	0.339991	0.616766	0.408371	0.447174	0.528534			6.2931	0.792872	0.528534	1.29	1.29	1.50013
										1.3	129.452	0.332649	93.3241	0.114763		0.547057	1.21414	0.352899	0.752206	0.320574	0.776348	0.979453	1.10037	0.755382		0.528107	0.72877	0.598359	0.546834	0.613181	0.299078	0.488367	0.541641	0.555705	0.544449			6.3031	0.755382	0.544449	1.3	1.3	1.38742
										1.31	130.216	0.335389	93.8465	0.0909926		0.51267	1.04499	0.384389	0.907488	0.350314	0.660396	0.994181	1.25972	0.764268		0.46858	0.62949	0.533122	0.547055	0.558643	0.329067	0.472754	0.620377	0.542256	0.522371			6.3128	0.764268	0.522371	1.31	1.31	1.46307
										1.32	131.013	0.360844	94.378	0.112363		0.565661	1.14494	0.347769	0.84834	0.301174	0.899147	0.981723	1.28897	0.797216		0.457056	0.712747	0.613873	0.461681	0.586486	0.314207	0.545717	0.552679	0.539321	0.53153			6.3229	0.797216	0.53153	1.32	1.32	1.49985
										1.33	131.779	0.365098	94.9075	0.0873172		0.51313	1.22956	0.309464	0.887131	0.342211	0.675337	0.939728	1.22768	0.76553		0.509841	0.53566	0.591439	0.530397	0.577862	0.316944	0.520727	0.618649	0.563988	0.529501			6.333	0.76553	0.529501	1.33	1.33	1.44576
										1.34	132.544	0.364151	95.4417	0.117568		0.518677	1.07876	0.365464	0.784772	0.346363	0.649824	1.0162	1.36289	0.765369		0.418844	0.652976	0.597181	0.532026	0.572565	0.314575	0.464692	0.687617	0.567618	0.534233			6.343	0.765369	0.534233	1.34	1.34	1.43265
										1.35	133.324	0.316085	95.9762	0.110392		0.49834	1.04361	0.463511	0.857388	0.304626	0.874205	1.03652	1.15913	0.779665		0.558535	0.709788	0.591848	0.457227	0.577937	0.316015	0.520791	0.479421	0.598408	0.534441			6.353	0.779665	0.534441	1.35	1.35	1.45884
										1.36	134.115	0.337672	96.4955	0.16329		0.557629	1.1243	0.376575	0.9278	0.310682	0.808752	1.06025	1.16333	0.791165		0.412788	0.587444	0.553627	0.503437	0.568163	0.324702	0.879837	0.363897	0.480592	0.519387			6.3628	0.791165	0.519387	1.36	1.36	1.52327
										1.37	134.903	0.378391	97.0039	0.122833		0.511365	1.13329	0.271989	0.72867	0.35173	0.948311	1.08474	1.27032	0.787552		0.502996	0.685449	0.580296	0.484428	0.583154	0.33858	0.431652	0.339165	0.629339	0.50834			6.3729	0.787552	0.50834	1.37	1.37	1.54926
										1.38	135.643	0.272696	97.5293	0.0949141		0.504853	0.79634	0.392162	0.805188	0.403597	0.981436	0.957616	1.08354	0.740592		0.494643	0.605553	0.543515	0.498843	0.578591	0.307337	0.634854	0.557209	0.508288	0.525426			6.383	0.740592	0.525426	1.38	1.38	1.40951
										1.39	136.437	0.34346	98.0371	0.115978		0.558831	1.19344	0.400362	0.759657	0.312695	0.897901	1.04733	1.17889	0.793639		0.509157	0.689144	0.513529	0.435422	0.554059	0.329399	0.664156	0.413264	0.462001	0.507792			6.3929	0.793639	0.507792	1.39	1.39	1.56292
										1.4	137.187	0.31947	98.5663	0.12379		0.501638	0.820111	0.409614	0.891351	0.310524	0.856126	0.941415	1.27052	0.750162		0.397138	0.641751	0.519067	0.62529	0.593343	0.348661	0.720257	0.459291	0.458143	0.529216			6.4028	0.750162	0.529216	1.4	1.4	1.4175
										1.41	137.912	0.299677	99.0834	0.109254		0.463668	0.910628	0.300759	0.950078	0.339919	0.915239	0.984574	0.933312	0.724772		0.373274	0.621791	0.612215	0.490421	0.558227	0.315744	0.598614	0.49714	0.586445	0.517097			6.4131	0.724772	0.517097	1.41	1.41	1.40162
										1.42	138.724	0.338098	99.6471	0.123601		0.562598	1.12269	0.39118	0.802686	0.360985	1.1678	0.933528	1.15766	0.812392		0.501173	0.645914	0.534234	0.545957	0.57807	0.310291	0.75579	0.65695	0.544989	0.563708			6.4229	0.812392	0.563708	1.42	1.42	1.44116
										1.43	139.506	0.335449	100.152	0.0883171		0.512548	0.997367	0.434698	0.788651	0.303767	0.887888	1.0839	1.2478	0.782077		0.446192	0.539524	0.510259	0.499924	0.577222	0.346759	0.417941	0.596726	0.61199	0.505171			6.433	0.782077	0.505171	1.43	1.43	1.54814
										1.44	140.302	0.39203	100.694	0.113982		0.537621	1.16585	0.267043	0.854119	0.308596	0.914738	0.971133	1.34986	0.79612		0.492198	0.704724	0.578348	0.528533	0.580149	0.325137	0.497095	0.683777	0.488414	0.542042			6.4428	0.79612	0.542042	1.44	1.44	1.46874
										1.45	141.057	0.358572	101.184	0.1047		0.498937	1.09917	0.343933	0.822166	0.307322	0.7427	0.901906	1.321	0.754643		0.524441	0.663669	0.547799	0.47781	0.568929	0.322743	0.448464	0.359945	0.494073	0.489764			6.453	0.754643	0.489764	1.45	1.45	1.54083
										1.46	141.828	0.362108	101.729	0.137362		0.482162	1.20656	0.322274	0.882167	0.30665	0.767511	1.07916	1.118	0.770561		0.487531	0.66753	0.506803	0.405865	0.54223	0.345905	0.781295	0.664841	0.500606	0.544734			6.4632	0.770561	0.544734	1.46	1.46	1.41456
										1.47	142.581	0.306672	102.287	0.145319		0.565831	0.972837	0.345381	0.886205	0.322498	0.824313	0.958888	1.15083	0.753348		0.478985	0.627816	0.574669	0.640811	0.576398	0.312238	0.834878	0.445755	0.531721	0.558141			6.4729	0.753348	0.558141	1.47	1.47	1.34974
										1.48	143.346	0.337477	102.788	0.0705262		0.476981	1.15753	0.375167	0.752352	0.351196	0.78631	1.09515	1.12191	0.764575		0.492445	0.557364	0.56241	0.513646	0.559353	0.34028	0.51081	0.448717	0.524338	0.50104			6.4832	0.764575	0.50104	1.48	1.48	1.52597
										1.49	144.124	0.29007	103.33	0.119634		0.572366	1.15514	0.479731	0.851268	0.327114	0.856765	0.925575	1.05881	0.778346		0.484287	0.681639	0.474049	0.459498	0.574853	0.332281	0.709659	0.625691	0.533655	0.541735			6.493	0.778346	0.541735	1.49	1.49	1.43677
										1.5	144.922	0.372502	103.847	0.130344		0.460942	1.22136	0.364164	0.986728	0.307068	0.823063	1.01703	1.20422	0.798072		0.456425	0.658394	0.515534	0.436979	0.573283	0.31851	0.758915	0.463929	0.47289	0.517206			6.5029	0.798072	0.517206	1.5	1.5	1.54304
										1.51	145.668	0.31938	104.322	0.129919		0.50619	1.07149	0.371373	0.756562	0.333166	0.776359	0.971937	1.17926	0.745793		0.397147	0.71072	0.584313	0.503401	0.571419	0.324158	0.396122	0.325958	0.462086	0.475036			6.5129	0.745793	0.475036	1.51	1.51	1.56997
										1.52	146.383	0.304105	104.847	0.128344		0.592086	1.06167	0.369116	0.772464	0.320748	0.601824	0.837921	1.16863	0.715558		0.452881	0.709847	0.547119	0.512243	0.615877	0.346036	0.686566	0.370815	0.485079	0.525163			6.523	0.715558	0.525163	1.52	1.52	1.36255
										1.53	147.121	0.288804	105.397	0.133206		0.571741	0.896194	0.341312	0.892284	0.317408	0.836187	1.04594	1.00003	0.737637		0.430618	0.744478	0.548773	0.510379	0.57412	0.313124	0.727116	0.538897	0.56099	0.549833			6.533	0.737637	0.549833	1.53	1.53	1.34157
										1.54	147.877	0.349571	105.923	0.0891613		0.447807	1.03984	0.31815	0.832145	0.295615	0.923395	1.01395	1.17532	0.755777		0.501362	0.594884	0.550444	0.513553	0.578794	0.330207	0.642939	0.47725	0.543891	0.525925			6.5431	0.755777	0.525925	1.54	1.54	1.43704
										1.55	148.629	0.302644	106.42	0.0998346		0.511223	1.05724	0.404426	0.886363	0.319297	0.797533	0.932865	1.11135	0.752537		0.45324	0.652042	0.55909	0.516602	0.56901	0.318692	0.386133	0.506128	0.510767	0.496856			6.553	0.752537	0.496856	1.55	1.55	1.5146
										1.56	149.431	0.370433	106.979	0.132488		0.532592	1.27185	0.358785	0.767001	0.389704	0.788203	0.989421	1.31604	0.8017		0.488205	0.813759	0.573577	0.532892	0.602588	0.309185	0.62113	0.566443	0.521676	0.558828			6.563	0.8017	0.558828	1.56	1.56	1.43461
										1.57	150.203	0.356055	107.467	0.0899229		0.543736	1.25966	0.299827	0.836339	0.314885	0.860503	0.926644	1.13216	0.77172		0.404947	0.542355	0.537765	0.512243	0.577651	0.319475	0.578742	0.408698	0.516572	0.488716			6.5728	0.77172	0.488716	1.57	1.57	1.57908
										1.58	150.939	0.329072	108.006	0.100731		0.443498	0.844407	0.336253	0.811703	0.315925	0.991405	0.956377	1.18868	0.736031		0.494202	0.722405	0.469616	0.533341	0.564041	0.348911	0.588685	0.553824	0.574139	0.538796			6.583	0.736031	0.538796	1.58	1.58	1.36607
										1.59	151.711	0.37521	108.524	0.0808036		0.606294	1.1425	0.303087	0.816388	0.321946	0.619904	1.05651	1.31262	0.772407		0.532485	0.574123	0.539569	0.504521	0.542956	0.316122	0.58687	0.562108	0.505286	0.518227			6.593	0.772407	0.518227	1.59	1.59	1.49048
										1.6	152.501	0.405008	108.993	0.109815		0.44899	1.27032	0.239453	0.819986	0.323403	1.05479	0.938232	1.22293	0.789763		0.455917	0.652852	0.49871	0.437056	0.606318	0.327625	0.376796	0.359439	0.50437	0.468787			6.6029	0.789763	0.468787	1.6	1.6	1.6847
										1.61	153.286	0.364855	109.544	0.144256		0.49505	1.16245	0.417187	0.800339	0.27756	0.890354	0.926674	1.31519	0.785601		0.419896	0.715123	0.512972	0.500776	0.553242	0.320121	0.66663	0.771663	0.496112	0.550726			6.6131	0.785601	0.550726	1.61	1.61	1.42648
										1.62	154.049	0.345025	110.078	0.111046		0.481885	0.966002	0.319253	0.852707	0.310369	1.00876	0.938289	1.22355	0.762601		0.443585	0.713385	0.504589	0.556952	0.573393	0.315234	0.593075	0.511821	0.593253	0.533921			6.6232	0.762601	0.533921	1.62	1.62	1.4283
										1.63	154.755	0.274958	110.577	0.103732		0.55018	0.84669	0.34229	0.820127	0.316832	0.77384	0.914389	1.08063	0.705623		0.469265	0.524747	0.517619	0.539037	0.559784	0.322312	0.658539	0.357789	0.54677	0.49954			6.6332	0.705623	0.49954	1.63	1.63	1.41254
										1.64	155.506	0.29571	111.093	0.09681		0.448374	1.02104	0.445831	0.858481	0.345322	0.879154	0.876372	1.13337	0.750993		0.492201	0.602272	0.521977	0.483636	0.531942	0.320929	0.618031	0.624828	0.443012	0.515425			6.6431	0.750993	0.515425	1.64	1.64	1.45704
										1.65	156.26	0.303628	111.616	0.0969903		0.54005	0.962476	0.370054	0.835102	0.333741	1.00137	0.845854	1.14879	0.75468		0.429628	0.651991	0.506254	0.508893	0.582732	0.33595	0.5183	0.622012	0.55527	0.523448			6.6529	0.75468	0.523448	1.65	1.65	1.44175
										1.66	156.978	0.285497	112.112	0.0968399		0.548286	0.950493	0.37381	0.788808	0.272112	0.852402	0.901257	1.05528	0.717807		0.394897	0.63156	0.554038	0.572089	0.571942	0.332353	0.502088	0.435899	0.463216	0.495342			6.6629	0.717807	0.495342	1.66	1.66	1.44911
										1.67	157.735	0.335533	112.65	0.148484		0.534742	1.1696	0.342416	0.819164	0.346119	0.770737	0.849389	1.22084	0.756626		0.461406	0.737525	0.530153	0.582915	0.541287	0.331582	0.786888	0.39142	0.487201	0.538931			6.6729	0.756626	0.538931	1.67	1.67	1.40394
										1.68	158.469	0.293839	113.164	0.120018		0.552885	0.968454	0.370631	0.83119	0.316779	0.789433	0.896714	1.14814	0.734279		0.394895	0.696174	0.52509	0.495861	0.556462	0.308689	0.651046	0.451698	0.542128	0.51356			6.683	0.734279	0.51356	1.68	1.68	1.42978
										1.69	159.174	0.312028	113.729	0.129355		0.46548	1.05399	0.363023	0.651368	0.299016	0.844917	0.829663	1.13232	0.704972		0.523803	0.71051	0.593801	0.425292	0.570145	0.314341	0.630499	0.713898	0.60143	0.564858			6.6931	0.704972	0.564858	1.69	1.69	1.24805
										1.7	159.931	0.355663	114.21	0.103265		0.467307	1.27567	0.420982	0.776047	0.318911	0.720169	0.85537	1.22209	0.757068		0.41136	0.606434	0.531533	0.515417	0.559669	0.326858	0.584375	0.340619	0.455558	0.481314			6.703	0.757068	0.481314	1.7	1.7	1.57292
										1.71	160.66	0.301161	114.702	0.0886124		0.456682	1.11495	0.418115	0.789449	0.300498	0.824963	0.895488	1.03055	0.728836		0.458364	0.5816	0.594818	0.471415	0.578875	0.307775	0.494578	0.459812	0.480435	0.491964			6.7128	0.728836	0.491964	1.71	1.71	1.48148
										1.72	161.354	0.290772	115.219	0.122319		0.502425	1.03551	0.303072	0.799724	0.331067	0.67288	0.892986	1.01453	0.694025		0.409992	0.708776	0.575909	0.461134	0.561964	0.321064	0.662185	0.474965	0.476789	0.516975			6.723	0.694025	0.516975	1.72	1.72	1.34247
										1.73	162.114	0.325251	115.727	0.0965909		0.580074	0.970918	0.361738	0.751111	0.333717	0.904724	0.883244	1.29583	0.76017		0.520485	0.636118	0.537074	0.456929	0.550524	0.316389	0.611798	0.509776	0.435096	0.508243			6.7331	0.76017	0.508243	1.73	1.73	1.49568
										1.74	162.829	0.30523	116.225	0.121721		0.557167	1.06259	0.335221	0.745344	0.318031	0.705272	0.844162	1.14734	0.71439		0.592295	0.700121	0.523225	0.426461	0.570798	0.310533	0.536997	0.357709	0.460797	0.49766			6.743	0.71439	0.49766	1.74	1.74	1.4355
										1.75	163.589	0.375079	116.729	0.113494		0.516602	1.10667	0.314796	0.762942	0.301304	0.838668	0.870155	1.37517	0.760788		0.506035	0.720991	0.516911	0.531722	0.532553	0.315764	0.448457	0.396641	0.568526	0.504178			6.753	0.760788	0.504178	1.75	1.75	1.50897
										1.76	164.292	0.323478	117.267	0.118136		0.514236	0.995417	0.250234	0.695323	0.28421	0.813746	1.00168	1.06275	0.702199		0.460479	0.60444	0.535202	0.516059	0.577337	0.314544	0.758906	0.523462	0.553665	0.538233			6.763	0.702199	0.538233	1.76	1.76	1.30464
										1.77	164.996	0.358968	117.784	0.101326		0.474082	1.01943	0.254774	0.725711	0.281082	0.665379	0.963639	1.25136	0.704433		0.468334	0.580599	0.589769	0.52033	0.547636	0.346938	0.641719	0.372625	0.581488	0.516604			6.7727	0.704433	0.516604	1.77	1.77	1.36358
										1.78	165.713	0.302176	118.282	0.10252		0.450599	0.881499	0.369701	0.77413	0.28655	0.990695	0.926878	1.05318	0.716654		0.495518	0.691921	0.519551	0.522608	0.553336	0.333111	0.537613	0.409617	0.422029	0.498367			6.7828	0.716654	0.498367	1.78	1.78	1.438
										1.79	166.467	0.316227	118.791	0.0964551		0.487278	1.03218	0.431589	0.857538	0.303875	0.806265	0.909188	1.20939	0.754663		0.494395	0.564049	0.52896	0.498987	0.55926	0.31094	0.485237	0.670879	0.462451	0.508351			6.7929	0.754663	0.508351	1.79	1.79	1.48453
										1.8	167.201	0.317344	119.316	0.150572		0.472759	0.994211	0.371716	0.797696	0.310081	0.795005	0.938505	1.19055	0.733815		0.416784	0.86398	0.529928	0.459184	0.57942	0.315544	0.550713	0.536049	0.472221	0.524869			6.8029	0.733815	0.524869	1.8	1.8	1.39809
										1.81	167.962	0.345304	119.828	0.118714		0.549564	1.21639	0.312766	0.711216	0.359974	0.82498	0.910646	1.19902	0.760569		0.420154	0.699495	0.521698	0.465876	0.552907	0.324366	0.67538	0.45562	0.4984	0.512655			6.8129	0.760569	0.512655	1.81	1.81	1.48359
										1.82	168.761	0.343984	120.348	0.105453		0.498894	1.09837	0.380217	0.88044	0.311718	1.07178	1.04342	1.10718	0.799004		0.461351	0.542947	0.566572	0.514505	0.564648	0.311189	0.685974	0.583213	0.444756	0.519462			6.8229	0.799004	0.519462	1.82	1.82	1.53814
										1.83	169.493	0.319696	120.818	0.0831517		0.513297	0.969109	0.325284	0.786951	0.300704	0.884066	0.891101	1.18861	0.732391		0.433989	0.558745	0.505835	0.514269	0.5976	0.322437	0.423548	0.456938	0.419865	0.470359			6.8331	0.732391	0.470359	1.83	1.83	1.55709
										1.84	170.229	0.332271	121.333	0.112777		0.557109	0.833218	0.389187	0.776634	0.296845	0.785087	0.890257	1.36081	0.736143		0.401636	0.701165	0.561518	0.543942	0.563518	0.314861	0.561298	0.545311	0.439054	0.5147			6.843	0.736143	0.5147	1.84	1.84	1.43024
										1.85	170.947	0.321325	121.885	0.134525		0.437093	1.16794	0.345865	0.773857	0.301534	0.873557	0.82047	1.02073	0.717631		0.443704	0.789548	0.49918	0.576977	0.579524	0.33536	0.705244	0.51067	0.533926	0.552681			6.8531	0.717631	0.552681	1.85	1.85	1.29845
										1.86	171.65	0.301184	122.411	0.111069		0.457958	1.00287	0.367426	0.692674	0.286862	0.806253	0.959911	1.05295	0.703363		0.465652	0.698379	0.53853	0.518448	0.60412	0.316176	0.450354	0.621351	0.512347	0.52504			6.8629	0.703363	0.52504	1.86	1.86	1.33964
										1.87	172.384	0.347498	122.916	0.133268		0.453423	1.05121	0.321816	0.823368	0.277357	0.789391	0.937009	1.21903	0.734075		0.461339	0.800717	0.560209	0.531166	0.517496	0.298971	0.45721	0.445466	0.481106	0.505965			6.873	0.734075	0.505965	1.87	1.87	1.45084
										1.88	173.062	0.316554	123.457	0.110838		0.455914	0.814025	0.273087	0.728201	0.294812	0.769503	0.892151	1.19383	0.67769		0.491517	0.634352	0.522744	0.501786	0.569224	0.325751	0.72829	0.585865	0.508957	0.540943			6.8831	0.67769	0.540943	1.88	1.88	1.25279
										1.89	173.756	0.289856	123.985	0.100374		0.51813	0.965188	0.26774	0.787253	0.334958	0.75204	0.869312	1.05488	0.693688		0.476858	0.648104	0.53859	0.534054	0.558851	0.320312	0.652914	0.470717	0.548956	0.527706			6.8931	0.693688	0.527706	1.89	1.89	1.31453
										1.9	174.482	0.327985	124.502	0.123487		0.486935	0.999754	0.286072	0.849839	0.306083	0.835522	0.868513	1.17702	0.726217		0.441155	0.438147	0.496623	0.54474	0.532776	0.308835	0.543833	0.763307	0.579217	0.516515			6.9028	0.726217	0.516515	1.9	1.9	1.406
										1.91	175.267	0.333379	125.028	0.108931		0.553298	1.14065	0.368185	0.830518	0.316305	1.01011	0.910215	1.15376	0.78538		0.459417	0.660448	0.564917	0.562111	0.565184	0.313526	0.658533	0.466835	0.482945	0.525991			6.9129	0.78538	0.525991	1.91	1.91	1.49314
										1.92	176.068	0.368876	125.523	0.122478		0.546865	1.29863	0.322967	0.807205	0.316049	0.999395	1.00187	1.11217	0.800644		0.505978	0.647297	0.550783	0.483313	0.56683	0.328966	0.619875	0.284514	0.466403	0.494884			6.923	0.800644	0.494884	1.92	1.92	1.61784
										1.93	176.847	0.377329	126.015	0.0802232		0.480642	1.32254	0.289185	0.854263	0.315478	0.952097	0.924576	1.09618	0.77937		0.446901	0.530655	0.580983	0.481697	0.583681	0.328097	0.438484	0.523907	0.520053	0.492718			6.933	0.77937	0.492718	1.93	1.93	1.58178
										1.94	177.592	0.351974	126.522	0.108402		0.501464	1.22771	0.332572	0.728516	0.307326	0.780716	0.896307	1.1795	0.744264		0.392035	0.517421	0.538791	0.566005	0.604326	0.32401	0.606189	0.397997	0.614303	0.506786			6.9429	0.744264	0.506786	1.94	1.94	1.46859
										1.95	178.318	0.283562	127.025	0.110143		0.497596	0.897372	0.366546	0.928437	0.325112	0.962695	0.819424	1.0187	0.726985		0.440718	0.706769	0.570728	0.517469	0.587109	0.318641	0.452203	0.475498	0.453435	0.502508			6.9529	0.726985	0.502508	1.95	1.95	1.44671
										1.96	179.003	0.250598	127.53	0.0896372		0.441732	0.864298	0.344763	0.878893	0.366295	0.81741	0.878007	0.881374	0.684096		0.479251	0.608713	0.546276	0.571908	0.549499	0.326935	0.535729	0.399234	0.534433	0.505775			6.963	0.684096	0.505775	1.96	1.96	1.35257
										1.97	179.76	0.315079	128.047	0.0791022		0.477244	1.10376	0.373642	0.797544	0.343482	1.02443	0.88035	1.05713	0.757198		0.501372	0.589733	0.562557	0.441238	0.573699	0.348357	0.58375	0.539002	0.506119	0.516203			6.9728	0.757198	0.516203	1.97	1.97	1.46686
										1.98	180.466	0.34382	128.544	0.083159		0.494258	0.95771	0.277107	0.721341	0.273825	0.727099	0.962188	1.23728	0.706351		0.464536	0.612441	0.508188	0.440704	0.5655	0.329238	0.500209	0.565974	0.490205	0.497444			6.9829	0.706351	0.497444	1.98	1.98	1.41996
										1.99	181.183	0.298736	129.046	0.0934612		0.51398	1.01368	0.335528	0.72836	0.34148	0.794433	0.862041	1.14334	0.716606		0.439105	0.530495	0.503898	0.505692	0.578173	0.301415	0.63735	0.497518	0.528847	0.502499			6.9929	0.716606	0.502499	1.99	1.99	1.42608
										2	181.887	0.317215	129.533	0.112075		0.471055	1.04716	0.342312	0.75546	0.295924	0.761996	0.785727	1.17551	0.704393		0.465765	0.565705	0.521768	0.437836	0.551371	0.324278	0.639811	0.310486	0.558352	0.486153			7.003	0.704393	0.486153	2	2	1.44891
										2.01	182.623	0.335547	130.018	0.0894923		0.4918	0.969671	0.313981	0.68192	0.298133	1.02438	0.967787	1.1413	0.736121		0.468194	0.656488	0.498555	0.502192	0.546787	0.321859	0.428528	0.468648	0.480813	0.485785			7.0129	0.736121	0.485785	2.01	2.01	1.51532
										2.02	183.346	0.334633	130.538	0.158497		0.491169	1.03035	0.307303	0.819985	0.288967	0.690938	0.988957	1.16265	0.72254		0.390916	0.88755	0.481947	0.484037	0.54711	0.306497	0.532628	0.521205	0.520651	0.519171			7.023	0.72254	0.519171	2.02	2.02	1.39172
										2.03	184.072	0.317354	131.05	0.097985		0.524856	0.998547	0.293405	0.795828	0.298943	0.830579	0.952	1.11824	0.72655		0.502996	0.690908	0.51906	0.47726	0.54461	0.317436	0.541324	0.465687	0.551241	0.51228			7.033	0.72655	0.51228	2.03	2.03	1.41827
										2.04	184.789	0.317692	131.555	0.130186		0.514415	0.906147	0.273565	0.812505	0.324782	0.776981	0.949716	1.1778	0.716988		0.464521	0.757043	0.511233	0.490587	0.555835	0.30686	0.578765	0.355176	0.526077	0.505122			7.0429	0.716988	0.505122	2.04	2.04	1.41944
										2.05	185.48	0.272647	132.098	0.123764		0.488547	0.993812	0.417277	0.730375	0.289559	0.690945	0.893216	1.02138	0.690639		0.465028	0.751204	0.511715	0.508326	0.570279	0.29786	0.566249	0.588382	0.629569	0.543179			7.0531	0.690639	0.543179	2.05	2.05	1.27148
										2.06	186.186	0.272357	132.583	0.0899871		0.525047	0.873089	0.342766	0.833375	0.305953	0.880956	0.875775	1.00758	0.705568		0.405996	0.569653	0.513384	0.506244	0.54981	0.332573	0.548203	0.375341	0.566632	0.485315			7.0629	0.705568	0.485315	2.06	2.06	1.45384
										2.07	186.877	0.350972	133.07	0.118029		0.467633	1.09248	0.23364	0.73832	0.274445	0.695946	0.8429	1.18411	0.691184		0.475983	0.695066	0.514013	0.526974	0.557084	0.289472	0.493979	0.339612	0.483703	0.486209			7.0729	0.691184	0.486209	2.07	2.07	1.42158
										2.08	187.608	0.306859	133.58	0.114744		0.482623	0.905624	0.294902	0.770435	0.365352	1.00387	0.965717	1.06562	0.731768		0.446569	0.684882	0.51041	0.486276	0.541495	0.304451	0.575643	0.416674	0.627902	0.510478			7.083	0.731768	0.510478	2.08	2.08	1.4335
										2.09	188.318	0.35015	134.079	0.0890213		0.508105	0.903449	0.264252	0.772288	0.297482	0.685321	0.941805	1.30411	0.709601		0.444398	0.643366	0.546143	0.535772	0.543786	0.321063	0.482754	0.516892	0.457174	0.499038			7.0929	0.709601	0.499038	2.09	2.09	1.42194
										2.1	189.013	0.32456	134.54	0.137056		0.474939	0.794256	0.266772	0.765761	0.291769	0.862366	0.899033	1.2034	0.694788		0.377637	0.670533	0.550565	0.421944	0.554695	0.31104	0.54821	0.235614	0.475292	0.460615			7.1033	0.694788	0.460615	2.1	2.1	1.50839
										2.11	189.801	0.380862	135.054	0.145046		0.490574	1.15533	0.29915	0.747931	0.34324	0.9278	1.02286	1.31611	0.787875		0.393476	0.618275	0.484368	0.512557	0.54876	0.344161	0.833688	0.444945	0.443255	0.51372			7.1131	0.787875	0.51372	2.11	2.11	1.53367
										2.12	190.536	0.302785	135.589	0.138721		0.469535	1.09498	0.389867	0.860976	0.320849	0.778831	0.922516	1.04821	0.735721		0.400377	0.732983	0.547881	0.473598	0.571007	0.312437	0.737594	0.5397	0.506691	0.535807			7.1229	0.735721	0.535807	2.12	2.12	1.37311
										2.13	191.224	0.280287	136.044	0.0746018		0.503612	0.985762	0.349359	0.749813	0.296732	0.690905	0.906317	1.01665	0.687393		0.394101	0.48445	0.470512	0.536379	0.56227	0.318735	0.412955	0.42945	0.479369	0.454247			7.1329	0.687393	0.454247	2.13	2.13	1.51326
										2.14	191.958	0.342856	136.536	0.0759971		0.462896	1.28125	0.374355	0.75953	0.302914	0.709022	1.00204	0.982136	0.734268		0.493928	0.502064	0.517601	0.465264	0.550119	0.315197	0.581255	0.474343	0.534646	0.492713			7.1432	0.734268	0.492713	2.14	2.14	1.49025
										2.15	192.692	0.356452	137.008	0.0954106		0.502331	0.923394	0.243657	0.835858	0.302005	0.848594	0.919987	1.29499	0.733852		0.456739	0.553127	0.496148	0.43042	0.536508	0.301634	0.60992	0.367733	0.496893	0.472125			7.153	0.733852	0.472125	2.15	2.15	1.55436
										2.16	193.377	0.319013	137.508	0.0756262		0.431672	0.937285	0.285712	0.748932	0.27356	0.727089	1.0573	1.01874	0.685036		0.503865	0.621596	0.501273	0.506639	0.542864	0.335442	0.469681	0.487112	0.530112	0.499843			7.163	0.685036	0.499843	2.16	2.16	1.3705
										2.17	194.052	0.32138	137.998	0.0960217		0.4191	1.13693	0.262433	0.776201	0.273458	0.742674	0.895061	0.89735	0.675401		0.42108	0.617716	0.511449	0.536759	0.574109	0.308581	0.402346	0.497667	0.538217	0.489769			7.173	0.675401	0.489769	2.17	2.17	1.37902
										2.18	194.778	0.260094	138.489	0.122856		0.52352	0.975477	0.432198	0.837278	0.353766	0.740827	0.887343	1.05279	0.725401		0.35924	0.737516	0.529245	0.458084	0.528294	0.313113	0.517037	0.430722	0.543214	0.490718			7.1829	0.725401	0.490718	2.18	2.18	1.47824
										2.19	195.509	0.327212	138.957	0.102495		0.515304	1.17652	0.302595	0.763871	0.329297	0.743303	0.957158	1.05839	0.730805		0.427996	0.513656	0.504939	0.450849	0.538593	0.31415	0.666652	0.383345	0.409555	0.467748			7.1929	0.730805	0.467748	2.19	2.19	1.56239
										2.2	196.241	0.291475	139.412	0.0721759		0.544847	0.990132	0.30588	0.803314	0.374648	0.869163	0.865567	1.10887	0.732803		0.459047	0.438751	0.548987	0.42794	0.557293	0.315039	0.421048	0.450945	0.479663	0.455412			7.203	0.732803	0.455412	2.2	2.2	1.6091
										2.21	196.969	0.33432	139.901	0.115824		0.572166	1.06579	0.319441	0.691404	0.278706	0.709022	1.01892	1.16261	0.727258		0.424078	0.65917	0.612355	0.468529	0.540667	0.305032	0.567532	0.367141	0.457654	0.489129			7.2129	0.727258	0.489129	2.21	2.21	1.48684
										2.22	197.66	0.299124	140.413	0.105479		0.403497	0.884654	0.322808	0.772924	0.292336	0.951517	0.921664	0.980624	0.691253		0.41722	0.593974	0.51131	0.451551	0.561225	0.313715	0.662307	0.584915	0.511332	0.51195			7.223	0.691253	0.51195	2.22	2.22	1.35024
										2.23	198.356	0.293622	140.929	0.145187		0.486343	0.874018	0.303341	0.845362	0.328075	0.725217	0.888442	1.11803	0.696103		0.425392	0.647898	0.505623	0.490822	0.537439	0.306002	0.793157	0.378558	0.560966	0.516206			7.2329	0.696103	0.516206	2.23	2.23	1.3485
										2.24	199.049	0.306263	141.415	0.0916307		0.565461	0.954701	0.269712	0.743459	0.288539	0.674124	0.962605	1.08476	0.69292		0.382372	0.590197	0.49677	0.504707	0.557707	0.349116	0.610547	0.473829	0.411373	0.486291			7.2431	0.69292	0.486291	2.24	2.24	1.42491
										2.25	199.74	0.331874	141.912	0.119428		0.538943	1.04514	0.223676	0.730231	0.257411	0.717744	0.917109	1.09433	0.690573		0.406251	0.720493	0.502299	0.457784	0.534641	0.324774	0.508322	0.6125	0.397929	0.49611			7.2531	0.690573	0.49611	2.25	2.25	1.39197
										2.26	200.457	0.351288	142.448	0.14741		0.416032	1.23333	0.30747	0.70935	0.284597	0.838668	0.931645	1.01871	0.717475		0.508938	0.561541	0.474949	0.468918	0.542214	0.335503	0.53383	0.887356	0.512913	0.53624			7.263	0.717475	0.53624	2.26	2.26	1.33797
										2.27	201.146	0.320451	142.93	0.0962324		0.48674	1.16495	0.290454	0.797692	0.241202	0.772616	0.852691	0.904447	0.68885		0.399701	0.623213	0.471485	0.579291	0.555943	0.306478	0.488993	0.467199	0.44662	0.482103			7.2731	0.68885	0.482103	2.27	2.27	1.42884
										2.28	201.874	0.293081	143.401	0.084294		0.538066	0.99714	0.314417	0.836334	0.325223	0.895413	0.885306	1.03618	0.72851		0.442345	0.527686	0.487559	0.40433	0.556047	0.298054	0.530679	0.443729	0.552507	0.471437			7.2828	0.72851	0.471437	2.28	2.28	1.5453
										2.29	202.583	0.300729	143.873	0.104783		0.653426	1.03468	0.290597	0.704048	0.265123	0.987035	0.756458	0.977771	0.708643		0.430927	0.568517	0.481595	0.462226	0.548443	0.312266	0.623635	0.324426	0.494729	0.471863			7.2929	0.708643	0.471863	2.29	2.29	1.5018
										2.3	203.257	0.289356	144.386	0.120532		0.390261	0.911141	0.350561	0.774449	0.310854	0.669755	0.984421	1.00017	0.673952		0.469635	0.763416	0.519069	0.481389	0.540866	0.325561	0.600568	0.480868	0.435611	0.512998			7.303	0.673952	0.512998	2.3	2.3	1.31375
										2.31	203.967	0.313227	144.874	0.0758601		0.503042	0.906764	0.319203	0.687363	0.360334	0.80182	0.844795	1.26057	0.710487		0.472	0.537672	0.524469	0.550482	0.566116	0.310721	0.475275	0.469112	0.482177	0.487558			7.3129	0.710487	0.487558	2.31	2.31	1.45723
										2.32	204.676	0.327389	145.369	0.112121		0.478087	1.17382	0.314345	0.774487	0.319483	0.658537	0.86681	1.08542	0.708874		0.422838	0.724256	0.488043	0.560329	0.543574	0.319548	0.424754	0.497623	0.474924	0.495099			7.3229	0.708874	0.495099	2.32	2.32	1.43178
										2.33	205.39	0.33651	145.839	0.0809278		0.518992	1.0129	0.290662	0.71761	0.25932	0.790008	0.934564	1.18825	0.714038		0.417572	0.47249	0.480133	0.541293	0.562591	0.333439	0.568187	0.38303	0.47544	0.470464			7.3329	0.714038	0.470464	2.33	2.33	1.51773
										2.34	206.107	0.306889	146.317	0.122435		0.467841	1.21508	0.434004	0.708867	0.309536	0.78259	0.789325	1.0226	0.716231		0.410111	0.726944	0.505698	0.505524	0.543266	0.284796	0.479633	0.378362	0.460578	0.477213			7.3428	0.716231	0.477213	2.34	2.34	1.50086
										2.35	206.795	0.318547	146.789	0.0868958		0.480228	0.95196	0.28894	0.75376	0.286863	0.703396	0.86389	1.17974	0.688597		0.49046	0.596894	0.549886	0.434642	0.515626	0.316049	0.50772	0.374515	0.469152	0.472772			7.3529	0.688597	0.472772	2.35	2.35	1.45651
										2.36	207.498	0.328507	147.261	0.071591		0.399233	1.00472	0.33898	0.786947	0.321847	0.763221	0.781236	1.2298	0.703249		0.459967	0.498498	0.56858	0.468513	0.521762	0.312091	0.505208	0.431633	0.478124	0.471597			7.363	0.703249	0.471597	2.36	2.36	1.49121
										2.37	208.209	0.283159	147.758	0.0716842		0.534171	0.972634	0.361779	0.78944	0.344207	0.733939	0.799499	1.1475	0.710396		0.469445	0.550863	0.511592	0.515128	0.529867	0.320871	0.540713	0.487964	0.550048	0.497388			7.3731	0.710396	0.497388	2.37	2.37	1.42825
										2.38	208.919	0.308163	148.242	0.120191		0.473	0.952258	0.286318	0.827779	0.313331	0.818684	0.920385	1.08828	0.710004		0.426944	0.749016	0.514082	0.410617	0.524038	0.318779	0.447249	0.532917	0.427911	0.483506			7.3828	0.710004	0.483506	2.38	2.38	1.46845
										2.39	209.621	0.271649	148.707	0.102999		0.547524	0.941358	0.385151	0.715272	0.281459	0.815626	0.91877	1.01517	0.702541		0.512892	0.669496	0.538251	0.421239	0.508881	0.335966	0.370572	0.391138	0.441925	0.465596			7.393	0.702541	0.465596	2.39	2.39	1.50891
										2.4	210.284	0.314561	149.201	0.122745		0.422791	0.929048	0.24609	0.820445	0.257748	0.72584	0.822386	1.0777	0.662756		0.457285	0.675497	0.483255	0.42124	0.516777	0.320399	0.699051	0.413358	0.453634	0.493388			7.403	0.662756	0.493388	2.4	2.4	1.34327
										2.41	210.972	0.27443	149.647	0.0758252		0.58295	0.973411	0.305999	0.729897	0.308911	0.717736	0.86828	1.01954	0.68834		0.454065	0.515766	0.492607	0.477331	0.51075	0.315645	0.509557	0.342313	0.401978	0.446668			7.413	0.68834	0.446668	2.41	2.41	1.54105
										2.42	211.67	0.303732	150.157	0.112412		0.452883	0.945676	0.327406	0.750151	0.281891	0.888452	0.845399	1.08933	0.697649		0.386297	0.687337	0.55709	0.458174	0.538136	0.313086	0.568083	0.588487	0.491658	0.509816			7.423	0.697649	0.509816	2.42	2.42	1.36843
										2.43	212.374	0.338274	150.662	0.114841		0.467247	1.23604	0.358228	0.776498	0.265903	0.61117	0.902302	1.01577	0.704145		0.385124	0.641309	0.507979	0.413736	0.535996	0.313966	0.646104	0.505833	0.587818	0.504207			7.4331	0.704145	0.504207	2.43	2.43	1.39654
										2.44	213.068	0.287086	151.169	0.102662		0.44914	1.00104	0.373065	0.692969	0.331637	0.729594	0.894886	1.0771	0.693679		0.553413	0.6357	0.496211	0.536675	0.571623	0.32189	0.478398	0.374826	0.595718	0.507162			7.4431	0.693679	0.507162	2.44	2.44	1.36777
										2.45	213.767	0.288958	151.689	0.115326		0.474615	0.818737	0.326019	0.822318	0.311348	0.87545	0.866196	1.09411	0.698599		0.489588	0.763495	0.531256	0.510301	0.552512	0.325073	0.450363	0.499792	0.560693	0.520341			7.4531	0.698599	0.520341	2.45	2.45	1.34258
										2.46	214.419	0.277807	152.155	0.0789317		0.507514	0.83703	0.31355	0.685351	0.300935	0.58375	0.937659	1.05195	0.652217		0.436319	0.511876	0.494686	0.455672	0.547318	0.315545	0.392404	0.464211	0.572111	0.465571			7.4629	0.652217	0.465571	2.46	2.46	1.4009
										2.47	215.08	0.322793	152.644	0.130099		0.451097	0.897578	0.2757	0.708062	0.265385	0.654809	0.837951	1.20027	0.661356		0.417716	0.593877	0.528142	0.456927	0.536309	0.301888	0.746425	0.382787	0.444571	0.489849			7.4733	0.661356	0.489849	2.47	2.47	1.35012
										2.48	215.796	0.330643	153.152	0.125566		0.472549	1.08579	0.385218	0.807058	0.29226	0.606172	0.873482	1.20091	0.71543		0.370973	0.731563	0.490185	0.535043	0.533292	0.289286	0.594903	0.523594	0.500265	0.507678			7.483	0.71543	0.507678	2.48	2.48	1.40922
										2.49	216.525	0.34046	153.668	0.132962		0.465756	1.25256	0.358742	0.736919	0.274214	0.838691	0.886371	1.02429	0.729694		0.449324	0.597767	0.500022	0.518793	0.521652	0.320206	0.806893	0.435599	0.491771	0.515781			7.4931	0.729694	0.515781	2.49	2.49	1.41474
										2.5	217.22	0.319223	154.169	0.0974856		0.462679	0.827289	0.256414	0.815929	0.272993	0.941491	0.891769	1.09162	0.695022		0.450455	0.533915	0.503974	0.444583	0.538067	0.316346	0.668516	0.48011	0.573308	0.50103			7.503	0.695022	0.50103	2.5	2.5	1.38719
										2.51	217.903	0.309903	154.645	0.0797922		0.462537	1.15118	0.311789	0.731765	0.279746	0.748298	0.806987	0.969452	0.68272		0.392855	0.530584	0.521773	0.442426	0.553137	0.316691	0.492742	0.554621	0.481399	0.476247			7.5129	0.68272	0.476247	2.51	2.51	1.43354
										2.52	218.606	0.322955	155.136	0.0797507		0.617517	0.840386	0.211182	0.682542	0.305559	0.883566	0.891939	1.18813	0.702603		0.432807	0.568302	0.517606	0.551121	0.537452	0.317138	0.469031	0.468578	0.552869	0.490545			7.5231	0.702603	0.490545	2.52	2.52	1.43229
										2.53	219.36	0.383669	155.596	0.0906502		0.491389	1.36371	0.273385	0.831922	0.32065	0.746969	0.866629	1.14402	0.754835		0.437661	0.575177	0.556607	0.473442	0.536903	0.309028	0.428542	0.348846	0.480368	0.46073			7.533	0.754835	0.46073	2.53	2.53	1.63834
										2.54	220.029	0.261078	156.057	0.0874582		0.450536	0.905688	0.38003	0.812196	0.270732	0.745177	0.946183	0.836708	0.668406		0.429503	0.62587	0.46983	0.451786	0.537034	0.312463	0.448471	0.393815	0.479423	0.46091			7.543	0.668406	0.46091	2.54	2.54	1.45019
										2.55	220.74	0.350024	156.555	0.08657		0.429502	1.07611	0.263252	0.677827	0.290031	0.917836	0.889044	1.14895	0.711569		0.435484	0.569827	0.498768	0.535907	0.541814	0.33489	0.615482	0.527786	0.419022	0.497664			7.553	0.711569	0.497664	2.55	2.55	1.42982
										2.56	221.402	0.24482	157.051	0.0847329		0.423849	0.829176	0.412047	0.832607	0.287746	0.758871	0.837733	0.912953	0.661873		0.421338	0.560509	0.503893	0.518205	0.54482	0.302726	0.51393	0.57523	0.524447	0.496122			7.563	0.661873	0.496122	2.56	2.56	1.33409
										2.57	222.104	0.277989	157.552	0.103116		0.558317	0.838204	0.386181	0.763541	0.266186	0.789418	0.923352	1.09142	0.702077		0.403556	0.616992	0.529519	0.503031	0.534537	0.326138	0.59932	0.598289	0.398708	0.501121			7.5731	0.702077	0.501121	2.57	2.57	1.40101
										2.58	222.711	0.238336	158.006	0.122627		0.444662	0.845059	0.254967	0.668204	0.302802	0.834324	0.732195	0.771451	0.606708		0.388857	0.50422	0.546283	0.548539	0.535373	0.315857	0.575004	0.217923	0.454488	0.45406			7.5829	0.606708	0.45406	2.58	2.58	1.33618
										2.59	223.38	0.288633	158.507	0.0971922		0.460494	1.05002	0.323732	0.699154	0.319716	0.614256	0.963637	0.919179	0.668773		0.447959	0.593562	0.473216	0.474994	0.595001	0.30286	0.618035	0.477899	0.52141	0.500548			7.593	0.668773	0.500548	2.59	2.59	1.33608
										2.6	224.085	0.316532	158.985	0.0888105		0.452428	0.97907	0.319673	0.697029	0.310679	0.920348	0.812786	1.15268	0.705587		0.375837	0.606124	0.544902	0.479021	0.513334	0.311062	0.517022	0.500209	0.452779	0.47781			7.6029	0.705587	0.47781	2.6	2.6	1.47671
										2.61	224.75	0.273063	159.478	0.11365		0.493187	0.860511	0.299225	0.748614	0.265589	0.793145	0.911263	0.942172	0.664213		0.473948	0.594956	0.49101	0.60302	0.548456	0.309658	0.611737	0.321002	0.483374	0.493018			7.6129	0.664213	0.493018	2.61	2.61	1.34724
										2.62	225.404	0.276853	159.985	0.152979		0.518376	0.974888	0.277881	0.774015	0.27276	0.645459	0.838378	0.936655	0.654801		0.396097	0.553268	0.512764	0.483256	0.53734	0.299651	0.842978	0.390612	0.549934	0.507322			7.6231	0.654801	0.507322	2.62	2.62	1.2907
										2.63	226.094	0.312335	160.452	0.074333		0.440962	0.953582	0.268099	0.820425	0.280238	0.770125	1.00541	0.97733	0.689521		0.394343	0.473538	0.493994	0.506445	0.511175	0.314067	0.530766	0.543789	0.431003	0.466569			7.6331	0.689521	0.466569	2.63	2.63	1.47785
										2.64	226.745	0.281211	160.96	0.144066		0.470584	0.958526	0.264924	0.911756	0.286367	0.654788	0.750265	0.908993	0.650775		0.492645	0.841477	0.535329	0.532895	0.52248	0.302825	0.426023	0.466411	0.45821	0.508699			7.6429	0.650775	0.508699	2.64	2.64	1.27929
										2.65	227.437	0.28685	161.439	0.0834796		0.469524	0.994682	0.361362	0.698421	0.276601	0.900969	0.865117	0.973631	0.692538		0.422385	0.60068	0.483043	0.442741	0.531944	0.33432	0.585579	0.466002	0.445159	0.479095			7.653	0.692538	0.479095	2.65	2.65	1.44551
										2.66	228.144	0.281986	161.907	0.0703686		0.578981	0.998719	0.341867	0.720711	0.283849	0.890992	0.825909	1.01451	0.706942		0.436027	0.551156	0.527797	0.411892	0.510133	0.332121	0.527643	0.473763	0.434387	0.467213			7.6629	0.706942	0.467213	2.66	2.66	1.5131
										2.67	228.797	0.298006	162.428	0.13218		0.420217	1.09713	0.303091	0.626882	0.276887	0.753919	0.890669	0.8504	0.652399		0.425702	0.77043	0.547115	0.494398	0.510338	0.318387	0.65543	0.433675	0.535933	0.521268			7.673	0.652399	0.521268	2.67	2.67	1.25156
										2.68	229.481	0.280207	162.887	0.0791856		0.493502	0.981383	0.334698	0.753763	0.299372	0.69594	0.957365	0.958224	0.684281		0.434181	0.533585	0.493371	0.504769	0.514169	0.317288	0.502065	0.338851	0.494946	0.459247			7.6832	0.684281	0.459247	2.68	2.68	1.49001
										2.69	230.13	0.267999	163.344	0.0699904		0.456612	0.940058	0.271384	0.729295	0.313146	0.730826	0.804076	0.946409	0.648976		0.458738	0.544008	0.476407	0.481777	0.546048	0.330037	0.376805	0.445158	0.454787	0.457085			7.6928	0.648976	0.457085	2.69	2.69	1.41981
										2.7	230.793	0.286722	163.838	0.0994074		0.502404	0.876846	0.283307	0.778068	0.305352	0.596217	0.914809	1.05128	0.663535		0.440694	0.633919	0.478199	0.470912	0.541811	0.320667	0.540728	0.406188	0.610743	0.493762			7.7032	0.663535	0.493762	2.7	2.7	1.34384
										2.71	231.503	0.308577	164.332	0.125582		0.542544	0.970273	0.276288	0.752659	0.293615	0.957729	0.803409	1.08062	0.709642		0.422574	0.721633	0.481258	0.45582	0.527984	0.298334	0.565673	0.592118	0.378131	0.493725			7.713	0.709642	0.493725	2.71	2.71	1.43732
										2.72	232.194	0.329533	164.792	0.0953227		0.514854	1.04842	0.275547	0.712759	0.305768	0.631117	0.851437	1.19156	0.691433		0.413733	0.584008	0.486798	0.551123	0.537243	0.319207	0.491477	0.322832	0.436399	0.460313			7.7228	0.691433	0.460313	2.72	2.72	1.50209
										2.73	232.945	0.343441	165.28	0.0948148		0.447721	1.04655	0.342181	0.717919	0.323095	1.20511	0.958007	0.965315	0.750738		0.436662	0.642307	0.526121	0.430257	0.526854	0.312999	0.52138	0.556532	0.43565	0.48764			7.7329	0.750738	0.48764	2.73	2.73	1.53953
										2.74	233.611	0.297621	165.736	0.106159		0.422815	1.07146	0.359413	0.659635	0.263253	0.691558	0.911089	0.948044	0.665908		0.490454	0.563308	0.484718	0.551855	0.542748	0.320313	0.477773	0.25598	0.423903	0.456784			7.7431	0.665908	0.456784	2.74	2.74	1.45782
										2.75	234.23	0.247102	166.211	0.106152		0.510065	0.794411	0.312681	0.673326	0.282396	0.560017	0.865169	0.951595	0.618708		0.395282	0.634118	0.480674	0.47172	0.532771	0.316537	0.568137	0.340321	0.53131	0.474541			7.7533	0.618708	0.474541	2.75	2.75	1.3038
										2.76	234.898	0.269738	166.71	0.0998593		0.497268	0.891438	0.370537	0.72773	0.229566	0.85053	0.80056	0.976334	0.667995		0.467269	0.591574	0.499186	0.459935	0.514799	0.308717	0.672186	0.45606	0.518452	0.498687			7.7629	0.667995	0.498687	2.76	2.76	1.33951
										2.77	235.585	0.378021	167.242	0.131488		0.401101	1.35443	0.291725	0.681923	0.285278	0.599924	0.83878	1.0403	0.686684		0.397762	0.524208	0.482486	0.551099	0.561331	0.308122	0.7743	0.599077	0.588799	0.531909			7.773	0.686684	0.531909	2.77	2.77	1.29098
										2.78	236.276	0.314755	167.692	0.0629851		0.497304	1.14177	0.309369	0.753734	0.273096	0.691572	0.860345	1.00705	0.69178		0.41267	0.481769	0.502716	0.408695	0.531007	0.318601	0.460954	0.459905	0.478384	0.450522			7.7827	0.69178	0.450522	2.78	2.78	1.53551
										2.79	236.986	0.281426	168.162	0.0749614		0.620475	0.911715	0.350637	0.800188	0.29218	0.802529	0.76227	1.13727	0.709658		0.425572	0.527642	0.481797	0.418046	0.52623	0.314801	0.501435	0.562598	0.472804	0.470103			7.793	0.709658	0.470103	2.79	2.79	1.50958
										2.8	237.66	0.292941	168.636	0.124963		0.483896	0.950392	0.284285	0.727256	0.292027	0.697807	0.936176	1.01787	0.673714		0.388115	0.576465	0.501546	0.400745	0.508151	0.324349	0.732096	0.463311	0.370871	0.473961			7.8029	0.673714	0.473961	2.8	2.8	1.42146
										2.81	238.365	0.308334	169.128	0.117816		0.428668	1.10326	0.329385	0.740826	0.313509	0.856089	0.875712	0.992948	0.70505		0.380636	0.66545	0.526474	0.363889	0.499946	0.31313	0.536377	0.618159	0.523842	0.491989			7.8132	0.70505	0.491989	2.81	2.81	1.43306
										2.82	239.042	0.310816	169.583	0.0886385		0.557618	1.06001	0.25765	0.696562	0.266371	0.674067	0.856355	1.04884	0.677184		0.373234	0.566109	0.514495	0.425726	0.547605	0.313038	0.382405	0.527703	0.443068	0.45482			7.8231	0.677184	0.45482	2.82	2.82	1.48891
										2.83	239.697	0.282905	170.086	0.124674		0.449249	0.942935	0.269234	0.739894	0.302082	0.70653	0.823619	1.00621	0.654969		0.439359	0.748464	0.514968	0.477333	0.539718	0.324597	0.606189	0.378855	0.500096	0.503286			7.8329	0.654969	0.503286	2.83	2.83	1.30138
										2.84	240.355	0.26484	170.549	0.114759		0.476178	0.956389	0.345085	0.722125	0.269509	0.707167	0.852286	0.93326	0.65775		0.381372	0.499331	0.549256	0.458609	0.525804	0.308605	0.653541	0.30429	0.488263	0.46323			7.8431	0.65775	0.46323	2.84	2.84	1.41992
										2.85	241.015	0.262646	170.991	0.131053		0.527257	0.942107	0.309847	0.705444	0.277657	0.732101	0.868861	0.916893	0.660021		0.43492	0.682901	0.484855	0.502302	0.523009	0.315715	0.363694	0.229481	0.435766	0.441405			7.853	0.660021	0.441405	2.85	2.85	1.49527
										2.86	241.698	0.345878	171.487	0.117401		0.384169	1.03198	0.254228	0.682689	0.29888	0.787579	0.837938	1.19291	0.683796		0.405941	0.622213	0.494339	0.496181	0.519682	0.307756	0.704058	0.412786	0.499471	0.495825			7.8629	0.683796	0.495825	2.86	2.86	1.37911
										2.87	242.382	0.330372	171.981	0.113118		0.47649	0.876211	0.326086	0.721161	0.286414	0.65979	0.825245	1.29712	0.683565		0.397827	0.675749	0.490806	0.497522	0.522385	0.312216	0.460955	0.64605	0.449241	0.49475			7.8732	0.683565	0.49475	2.87	2.87	1.38164
										2.88	243.094	0.327543	172.435	0.0729224		0.51095	1.10471	0.294692	0.702647	0.255514	0.916579	0.873275	1.03738	0.711969		0.481801	0.488295	0.490452	0.478119	0.530265	0.31692	0.479024	0.339708	0.473805	0.453154			7.883	0.711969	0.453154	2.88	2.88	1.57114
										2.89	243.784	0.291302	172.926	0.122417		0.471948	1.01446	0.263648	0.783666	0.327343	0.935255	0.85394	0.869117	0.689922		0.447513	0.392118	0.438866	0.522764	0.574734	0.310609	0.581875	0.721062	0.42974	0.491031			7.893	0.689922	0.491031	2.89	2.89	1.40505
										2.9	244.456	0.292898	173.409	0.078522		0.468452	1.07562	0.321557	0.718372	0.333764	0.610517	0.813394	1.03676	0.672304		0.416663	0.539423	0.522806	0.484032	0.532256	0.321609	0.546296	0.552987	0.430293	0.482929			7.9031	0.672304	0.482929	2.9	2.9	1.39214
										2.91	245.1	0.269453	173.904	0.0999918		0.559052	0.802983	0.238675	0.692197	0.307536	0.67351	0.827077	1.04592	0.643369		0.434429	0.606863	0.495242	0.480143	0.537966	0.299332	0.466528	0.645485	0.495402	0.49571			7.9131	0.643369	0.49571	2.91	2.91	1.29787
										2.92	245.799	0.344419	174.329	0.0712308		0.381366	1.16286	0.344136	0.73817	0.277327	0.689087	0.890056	1.11426	0.699658		0.408969	0.490207	0.471548	0.421704	0.545647	0.332147	0.410436	0.322463	0.42386	0.42522			7.9229	0.699658	0.42522	2.92	2.92	1.6454	ccc
										2.93	246.505	0.336006	174.775	0.0892144		0.430881	1.08993	0.284519	0.789423	0.267957	0.802536	0.885078	1.09244	0.705345		0.436424	0.520104	0.56243	0.410779	0.517607	0.330449	0.407322	0.309773	0.515014	0.445545			7.9329	0.705345	0.445545	2.93	2.93	1.58311
										2.94	247.144	0.306036	175.274	0.123092		0.452844	1.11506	0.227768	0.642962	0.295873	0.693453	0.746957	0.9437	0.639827		0.440032	0.754236	0.544212	0.522751	0.495997	0.296055	0.508913	0.52176	0.408609	0.499174			7.943	0.639827	0.499174	2.94	2.94	1.28177
										2.95	247.813	0.247224	175.702	0.113728		0.494889	0.926083	0.358395	0.7053	0.33943	0.691542	0.890233	0.943898	0.668721		0.384498	0.625131	0.484578	0.461676	0.540046	0.306734	0.40982	0.259406	0.379317	0.427912			7.953	0.668721	0.427912	2.95	2.95	1.56275
										2.96	248.493	0.307705	176.138	0.109426		0.469318	1.00211	0.310431	0.733346	0.251301	0.892215	0.718275	1.06069	0.679711		0.386249	0.554898	0.498352	0.486659	0.515633	0.315744	0.331259	0.274979	0.558575	0.435816			7.9631	0.679711	0.435816	2.96	2.96	1.55963
										2.97	249.143	0.283041	176.624	0.122749		0.51342	1.05353	0.272796	0.679551	0.330672	0.554452	0.909604	0.890096	0.650515		0.478111	0.745895	0.498429	0.430959	0.505536	0.291471	0.558802	0.416138	0.449354	0.486077			7.9731	0.650515	0.486077	2.97	2.97	1.3383
										2.98	249.837	0.366268	177.061	0.115006		0.469584	1.1169	0.289732	0.678339	0.27548	0.588701	0.865152	1.26901	0.694113		0.420582	0.48531	0.52126	0.441657	0.517486	0.320072	0.597444	0.213681	0.419009	0.437389			7.9831	0.694113	0.437389	2.98	2.98	1.58695
										2.99	250.514	0.300898	177.599	0.150719		0.484617	1.06067	0.297553	0.787264	0.256216	0.72959	0.805116	0.988749	0.676223		0.418223	0.764469	0.487624	0.45217	0.547297	0.3132	0.561279	0.771736	0.517962	0.537107			7.9932	0.676223	0.537107	2.99	2.99	1.25901
										3	251.156	0.283289	178.076	0.11096		0.433918	0.969746	0.267026	0.773351	0.258451	0.720866	0.808211	0.910782	0.642794		0.415661	0.454843	0.506935	0.445217	0.54107	0.320504	0.525141	0.706314	0.382965	0.477628			8.0031	0.642794	0.477628	3	3	1.3458
										3.01	251.808	0.295767	178.565	0.110813		0.473481	0.88475	0.258908	0.668203	0.284602	0.735719	0.80048	1.10751	0.651706		0.451822	0.592893	0.535799	0.49152	0.524674	0.303549	0.670274	0.367973	0.462704	0.489023			8.013	0.651706	0.489023	3.01	3.01	1.33267
										3.02	252.464	0.274431	179.043	0.0890691		0.483555	1.08864	0.318246	0.676624	0.303095	0.721456	0.767085	0.889665	0.656046		0.399324	0.574324	0.500631	0.453179	0.52653	0.304346	0.455942	0.595377	0.487866	0.477502			8.023	0.656046	0.477502	3.02	3.02	1.37391
										3.03	253.137	0.294497	179.512	0.125892		0.452799	0.952384	0.302729	0.74392	0.263851	0.758891	0.893978	1.01184	0.67255		0.420431	0.734326	0.47923	0.400155	0.499713	0.313395	0.539972	0.334891	0.500808	0.469213			8.0333	0.67255	0.469213	3.03	3.03	1.43336
										3.04	253.816	0.311153	179.974	0.073302		0.409202	1.0392	0.355473	0.729897	0.2724	0.659128	0.893564	1.07417	0.679129		0.416457	0.522352	0.501169	0.424203	0.503775	0.309168	0.455933	0.557132	0.472932	0.462569			8.043	0.679129	0.462569	3.04	3.04	1.46817
										3.05	254.511	0.309379	180.47	0.130835		0.509553	0.922088	0.325471	0.693767	0.299105	0.741384	0.867613	1.20374	0.69534		0.413596	0.696507	0.497672	0.440791	0.556352	0.307317	0.683459	0.385218	0.480454	0.495707			8.0529	0.69534	0.495707	3.05	3.05	1.40272
										3.06	255.185	0.267924	180.939	0.0785962		0.479646	0.839514	0.365362	0.789803	0.279797	0.862344	0.730734	1.04082	0.673503		0.403634	0.531511	0.48138	0.445042	0.536931	0.32477	0.406701	0.537567	0.549706	0.468582			8.063	0.673503	0.468582	3.06	3.06	1.43732
										3.07	255.863	0.241799	181.418	0.101933		0.501109	0.821183	0.410156	0.753571	0.290834	0.882241	0.842322	0.925813	0.678404		0.415039	0.544907	0.481454	0.495716	0.503363	0.307387	0.649814	0.372906	0.541653	0.479138			8.073	0.678404	0.479138	3.07	3.07	1.41588
										3.08	256.519	0.284861	181.867	0.0842939		0.420699	0.891998	0.281023	0.737205	0.27248	0.876077	0.80737	0.958197	0.655631		0.392333	0.52002	0.514367	0.495087	0.516562	0.307192	0.513895	0.333683	0.446031	0.448797			8.0831	0.655631	0.448797	3.08	3.08	1.46086
										3.09	257.198	0.304455	182.304	0.0756017		0.459751	0.882899	0.279927	0.745436	0.261018	0.850501	0.90211	1.05534	0.679623		0.445564	0.516832	0.461019	0.423965	0.531425	0.313895	0.38484	0.350982	0.502888	0.436823			8.093	0.679623	0.436823	3.09	3.09	1.55583
										3.1	257.87	0.32407	182.762	0.0874799		0.446561	1.12386	0.32951	0.755129	0.250176	0.568039	0.877208	1.02567	0.67202		0.445781	0.610123	0.488515	0.43994	0.544399	0.312907	0.407232	0.489917	0.390421	0.458804			8.1031	0.67202	0.458804	3.1	3.1	1.46472
										3.11	258.495	0.248857	183.213	0.0884121		0.423762	0.850612	0.285056	0.775113	0.29717	0.689028	0.807171	0.868432	0.624543		0.387409	0.56946	0.506321	0.471226	0.524743	0.311431	0.515162	0.343659	0.430236	0.451072			8.1131	0.624543	0.451072	3.11	3.11	1.38458
										3.12	259.123	0.275345	183.646	0.121741		0.418982	1.07088	0.263238	0.727578	0.317353	0.676583	0.720922	0.82901	0.628069		0.41802	0.443182	0.44627	0.465229	0.533603	0.297373	0.652307	0.234371	0.401974	0.432481			8.1231	0.628069	0.432481	3.12	3.12	1.45225
										3.13	259.794	0.302747	184.135	0.105384		0.498831	1.11779	0.246122	0.680508	0.296858	0.858499	0.873378	0.795987	0.670997		0.417344	0.645069	0.510787	0.436323	0.514796	0.312377	0.638543	0.481937	0.446205	0.489264			8.1329	0.670997	0.489264	3.13	3.13	1.37144
										3.14	260.452	0.260795	184.616	0.0836133		0.505424	0.78996	0.290181	0.75524	0.293485	0.784926	0.89654	0.949163	0.658115		0.363397	0.545032	0.497172	0.469	0.525074	0.329225	0.579986	0.483711	0.534012	0.480734			8.143	0.658115	0.480734	3.14	3.14	1.36898
										3.15	261.115	0.267563	185.074	0.0665064		0.512059	0.978393	0.282914	0.66042	0.335222	0.728327	0.84374	0.963049	0.663016		0.49313	0.506432	0.478379	0.446695	0.52114	0.318029	0.465956	0.38688	0.508629	0.458363			8.1529	0.663016	0.458363	3.15	3.15	1.44648
										3.16	261.741	0.260452	185.539	0.1096		0.500702	0.947296	0.28203	0.645436	0.261959	0.673421	0.801939	0.893381	0.62577		0.396095	0.708539	0.48214	0.474639	0.493819	0.304793	0.457205	0.468086	0.393669	0.464332			8.163	0.62577	0.464332	3.16	3.16	1.34768
										3.17	262.451	0.303279	185.998	0.0835995		0.505032	1.01865	0.305237	0.699681	0.30935	0.882866	0.912053	1.04377	0.70958		0.405058	0.57732	0.488737	0.432135	0.548621	0.329704	0.537558	0.429052	0.384311	0.459166			8.1731	0.70958	0.459166	3.17	3.17	1.54537
										3.18	263.105	0.272196	186.5	0.116741		0.523399	0.964895	0.304647	0.65636	0.276527	0.690336	0.845833	0.97379	0.654473		0.376523	0.657368	0.541404	0.49314	0.504415	0.301581	0.664772	0.473067	0.504617	0.501876			8.1831	0.654473	0.501876	3.18	3.18	1.30405
										3.19	263.843	0.333392	186.956	0.0900517		0.445039	0.969616	0.337324	0.718855	0.304456	1.00809	1.00314	1.12071	0.738403		0.35432	0.583634	0.483665	0.478793	0.550006	0.304298	0.409834	0.506705	0.435785	0.456338			8.193	0.738403	0.456338	3.19	3.19	1.61811
										3.2	264.508	0.289261	187.417	0.0772955		0.479055	0.859081	0.326237	0.673492	0.267097	0.767625	0.831079	1.11465	0.66479		0.422936	0.57111	0.532562	0.423024	0.533711	0.314818	0.462149	0.429328	0.461881	0.46128			8.2031	0.66479	0.46128	3.2	3.2	1.44119
										3.21	265.187	0.295343	187.861	0.0708748		0.46535	1.08453	0.292014	0.746275	0.306995	0.734593	0.849519	0.954053	0.679166		0.397074	0.473259	0.476334	0.45707	0.541603	0.291998	0.493953	0.446191	0.41605	0.443726			8.213	0.679166	0.443726	3.21	3.21	1.5306
										3.22	265.826	0.265814	188.35	0.0721826		0.453188	0.770162	0.291474	0.76391	0.272395	0.70645	0.886309	0.965165	0.638632		0.453737	0.566152	0.500629	0.487137	0.514798	0.314462	0.517639	0.518089	0.528403	0.489005			8.2232	0.638632	0.489005	3.22	3.22	1.30598
										3.23	266.445	0.278468	188.822	0.0820493		0.456343	0.936852	0.227425	0.676936	0.261694	0.675375	0.780181	0.93808	0.619111		0.37944	0.470434	0.48568	0.475378	0.50005	0.30785	0.565678	0.555938	0.511198	0.472405			8.2331	0.619111	0.472405	3.23	3.23	1.31055
										3.24	267.087	0.273091	189.268	0.10764		0.458704	0.879489	0.273335	0.670995	0.27208	0.811073	0.810617	0.960496	0.642099		0.406751	0.589599	0.526157	0.503332	0.500251	0.300284	0.38982	0.276968	0.516114	0.445475			8.243	0.642099	0.445475	3.24	3.24	1.44138
										3.25	267.755	0.28001	189.714	0.0869616		0.556486	1.02192	0.297441	0.695624	0.272422	0.685353	0.928254	0.888352	0.668231		0.395131	0.552366	0.514477	0.510237	0.520302	0.322701	0.467176	0.322659	0.408623	0.445964			8.253	0.668231	0.445964	3.25	3.25	1.4984
										3.26	268.423	0.308302	190.19	0.0897584		0.458364	1.0341	0.234499	0.723184	0.295355	0.734572	0.8498	1.01449	0.668046		0.401329	0.608535	0.442271	0.484429	0.497864	0.322159	0.578151	0.52726	0.422195	0.476021			8.2631	0.668046	0.476021	3.26	3.26	1.4034
										3.27	269.033	0.251973	190.665	0.0839188		0.406422	0.849804	0.268508	0.628934	0.294105	0.745776	0.803547	0.879861	0.60962		0.429879	0.569447	0.488935	0.484147	0.526227	0.300457	0.452227	0.447092	0.578531	0.475216			8.273	0.60962	0.475216	3.27	3.27	1.28283
										3.28	269.719	0.357004	191.144	0.0871395		0.439261	1.10324	0.252453	0.608059	0.273819	0.775709	0.83915	1.19762	0.686164		0.394224	0.529562	0.527151	0.471168	0.53101	0.328721	0.422277	0.489197	0.62047	0.479309			8.2829	0.686164	0.479309	3.28	3.28	1.43157		ccc
										3.29	270.357	0.267305	191.641	0.117851		0.415587	0.905459	0.292557	0.793483	0.266085	0.729532	0.835398	0.861593	0.637462		0.449391	0.421289	0.492256	0.444884	0.541813	0.319852	0.749544	0.553624	0.497093	0.496638			8.2928	0.637462	0.496638	3.29	3.29	1.28355
										3.3	271.006	0.2588	192.098	0.0838999		0.480507	0.997174	0.322398	0.764493	0.282671	0.694672	0.81337	0.838526	0.649226		0.39833	0.579665	0.493643	0.430508	0.514679	0.295024	0.45895	0.41768	0.525317	0.457088			8.303	0.649226	0.457088	3.3	3.3	1.42035
										3.31	271.7	0.310473	192.548	0.0800432		0.496189	0.914414	0.331828	0.723682	0.299692	0.70153	0.870558	1.21196	0.693732		0.359132	0.476133	0.489903	0.462771	0.516543	0.2903	0.55138	0.464228	0.437835	0.449803			8.3127	0.693732	0.449803	3.31	3.31	1.5423
										3.32	272.355	0.25913	192.991	0.133602		0.509627	0.9562	0.321722	0.650133	0.295612	0.754523	0.940994	0.816971	0.655723		0.403875	0.58597	0.466408	0.371908	0.513865	0.314041	0.674754	0.245672	0.412616	0.443234			8.3231	0.655723	0.443234	3.32	3.32	1.4794
										3.33	273.018	0.316395	193.489	0.110551		0.504264	1.08715	0.239262	0.604006	0.278623	0.706447	0.864107	1.01306	0.662114		0.46222	0.628989	0.484782	0.498365	0.506577	0.320175	0.644042	0.576169	0.35648	0.497533			8.3329	0.662114	0.497533	3.33	3.33	1.33079
										3.34	273.642	0.253858	193.926	0.0935546		0.48293	1.00348	0.302114	0.736384	0.316434	0.550702	0.734862	0.866285	0.624149		0.361336	0.489656	0.479363	0.455758	0.488927	0.330534	0.585488	0.285679	0.456934	0.437075			8.343	0.624149	0.437075	3.34	3.34	1.42801
										3.35	274.284	0.253135	194.407	0.0773661		0.489674	0.902586	0.346639	0.611011	0.269996	0.741441	0.872415	0.902516	0.642035		0.429808	0.497968	0.506241	0.475122	0.535686	0.303788	0.530743	0.567225	0.481452	0.480893			8.3531	0.642035	0.480893	3.35	3.35	1.33509
										3.36	274.902	0.25449	194.877	0.0847774		0.446095	0.914055	0.280999	0.632036	0.272926	0.791825	0.772897	0.839607	0.618805		0.423794	0.546688	0.487546	0.455014	0.522698	0.315777	0.43913	0.610644	0.429332	0.470069			8.3629	0.618805	0.470069	3.36	3.36	1.31641
										3.37	275.545	0.28968	195.378	0.124082		0.385139	1.03831	0.315298	0.677398	0.263204	0.756413	0.778236	0.927022	0.642628		0.352831	0.70285	0.528	0.437214	0.519159	0.306556	0.548837	0.624218	0.492792	0.501384			8.373	0.642628	0.501384	3.37	3.37	1.28171
										3.38	276.202	0.278549	195.812	0.0688299		0.464895	0.951085	0.301488	0.652312	0.315536	0.810131	0.718041	1.04372	0.657151		0.41565	0.489854	0.457839	0.4355	0.514073	0.312657	0.359943	0.406719	0.51468	0.434102			8.3831	0.657151	0.434102	3.38	3.38	1.51382
										3.39	276.886	0.282663	196.261	0.0882165		0.534673	0.968319	0.314708	0.653406	0.273224	0.907234	0.906308	0.909499	0.683421		0.374595	0.568908	0.484232	0.392333	0.532642	0.314837	0.508968	0.366082	0.49823	0.448981			8.3929	0.683421	0.448981	3.39	3.39	1.52216
										3.4	277.526	0.314629	196.717	0.105941		0.434371	0.991534	0.276842	0.63174	0.262157	0.712145	0.678362	1.13567	0.640352		0.357761	0.582891	0.475837	0.485671	0.551142	0.310515	0.328168	0.580546	0.429709	0.455804			8.4031	0.640352	0.455804	3.4	3.4	1.40488
										3.41	278.191	0.266226	197.185	0.0863612		0.447152	0.960608	0.344596	0.711532	0.315243	0.750735	0.790748	0.99813	0.664843		0.446203	0.575812	0.502513	0.438959	0.519562	0.308895	0.426046	0.580801	0.412541	0.467926			8.4131	0.664843	0.467926	3.41	3.41	1.42083
										3.42	278.837	0.314122	197.633	0.104387		0.427632	0.821537	0.286215	0.687806	0.262371	0.632976	0.867639	1.17944	0.645702		0.386291	0.613935	0.503135	0.493068	0.509927	0.311317	0.502599	0.292123	0.416946	0.447705			8.4231	0.645702	0.447705	3.42	3.42	1.44225
										3.43	279.506	0.282748	198.097	0.122792		0.548231	0.922045	0.246276	0.702804	0.274211	0.864858	0.876484	0.921794	0.669588		0.398947	0.706004	0.477986	0.503815	0.515732	0.312154	0.485281	0.292529	0.485378	0.464203			8.433	0.669588	0.464203	3.43	3.43	1.44245
										3.44	280.172	0.305749	198.561	0.0725516		0.400433	1.08511	0.330805	0.681301	0.261769	0.826141	0.764759	0.977137	0.665932		0.421829	0.538261	0.510334	0.475458	0.538384	0.300836	0.471548	0.447022	0.470205	0.463764			8.443	0.665932	0.463764	3.44	3.44	1.43593
										3.45	280.836	0.31095	198.996	0.0815812		0.362903	1.05791	0.408864	0.715854	0.277383	0.576262	0.817981	1.09101	0.663522		0.398481	0.526222	0.504977	0.44652	0.542323	0.327787	0.376824	0.466343	0.329258	0.435415			8.4534	0.663522	0.435415	3.45	3.45	1.52388
										3.46	281.497	0.294497	199.458	0.0963733		0.496291	0.979015	0.253706	0.67505	0.272472	0.767598	0.844595	1.00265	0.661422		0.43483	0.619488	0.461569	0.446441	0.500473	0.305379	0.384254	0.58499	0.425382	0.462534			8.4632	0.661422	0.462534	3.46	3.46	1.43
										3.47	282.076	0.227851	199.927	0.0885015		0.553605	0.853159	0.264912	0.602547	0.227068	0.679091	0.651112	0.801091	0.579073		0.384455	0.619436	0.487449	0.437992	0.496411	0.330881	0.570658	0.448636	0.437234	0.468128			8.4731	0.579073	0.468128	3.47	3.47	1.237
										3.48	282.73	0.276173	200.383	0.0680781		0.464921	1.02202	0.290684	0.716193	0.286914	0.750792	0.800346	0.901601	0.654184		0.427819	0.487675	0.475986	0.486428	0.50077	0.293812	0.442234	0.529209	0.465987	0.456658			8.4828	0.654184	0.456658	3.48	3.48	1.43255
										3.49	283.363	0.244117	200.873	0.0979452		0.497242	0.887889	0.396031	0.646786	0.264501	0.583094	0.838775	0.944106	0.632303		0.412796	0.516835	0.45146	0.4909	0.508748	0.321532	0.684104	0.535954	0.482162	0.489388			8.493	0.632303	0.489388	3.49	3.49	1.29203
										3.5	284	0.261484	201.361	0.104436		0.432895	1.03933	0.355971	0.725231	0.265024	0.702065	0.773307	0.801756	0.636948		0.3754	0.663099	0.514489	0.430437	0.508461	0.330837	0.60921	0.479549	0.483492	0.48833			8.5029	0.636948	0.48833	3.5	3.5	1.30434
										3.51	284.67	0.289369	201.813	0.0954861		0.52963	0.965897	0.283221	0.73642	0.281641	0.729577	0.770358	1.07054	0.670911		0.451747	0.634241	0.495017	0.414539	0.512369	0.298865	0.475849	0.362869	0.42255	0.452005			8.5131	0.670911	0.452005	3.51	3.51	1.4843
										3.52	285.282	0.275794	202.261	0.0904592		0.404277	0.733987	0.302697	0.584764	0.265669	0.679687	0.883011	1.0363	0.611298		0.349401	0.603372	0.454573	0.414034	0.507606	0.326511	0.457189	0.382516	0.535857	0.447895			8.5229	0.611298	0.447895	3.52	3.52	1.36482
										3.53	285.973	0.334958	202.735	0.0727674		0.526639	1.03902	0.24159	0.601823	0.261553	0.899045	0.853457	1.1072	0.691291		0.467256	0.569619	0.472806	0.473596	0.507104	0.308465	0.47778	0.539471	0.454643	0.474527			8.5329	0.691291	0.474527	3.53	3.53	1.4568
										3.54	286.615	0.267582	203.181	0.0955068		0.443439	0.957234	0.351533	0.585127	0.274337	0.73708	0.850129	0.937403	0.642035		0.373213	0.562954	0.518906	0.518858	0.506237	0.312039	0.456506	0.300043	0.465617	0.446041			8.543	0.642035	0.446041	3.54	3.54	1.43941
										3.55	287.226	0.283924	203.644	0.131588		0.426207	1.07868	0.260962	0.662252	0.278396	0.621149	0.680395	0.876924	0.610621		0.387357	0.612925	0.520024	0.448044	0.508568	0.301998	0.689795	0.322255	0.375791	0.462973			8.5531	0.610621	0.462973	3.55	3.55	1.31891
										3.56	287.825	0.260333	204.116	0.0935019		0.404332	0.775185	0.250774	0.699883	0.268566	0.65668	0.784551	0.955505	0.599434		0.456741	0.47389	0.520159	0.450216	0.524346	0.324102	0.65723	0.384076	0.456003	0.471863			8.563	0.599434	0.471863	3.56	3.56	1.27036
										3.57	288.448	0.302878	204.594	0.095391		0.429263	0.905605	0.182344	0.784918	0.26679	0.581837	0.860381	0.968578	0.622464		0.444884	0.466476	0.525012	0.472943	0.498388	0.318633	0.652243	0.381351	0.53977	0.477744			8.5729	0.622464	0.477744	3.57	3.57	1.30292
										3.58	289.112	0.27613	205.031	0.0781336		0.461706	0.812774	0.359223	0.667114	0.281647	0.808146	0.84022	1.08798	0.664851		0.378835	0.418405	0.432328	0.488559	0.5394	0.311873	0.491412	0.354586	0.517837	0.437026			8.5829	0.664851	0.437026	3.58	3.58	1.52131
										3.59	289.732	0.266099	205.567	0.177643		0.413309	0.944617	0.276062	0.625146	0.275653	0.751427	0.84758	0.823972	0.619721		0.356007	0.902618	0.477645	0.466482	0.532878	0.321311	0.712117	0.538454	0.519001	0.536279			8.5932	0.619721	0.536279	3.59	3.59	1.15559
										3.6	290.353	0.259624	206.028	0.116714		0.45928	0.871705	0.323013	0.636574	0.280056	0.59433	0.79512	1.00378	0.620482		0.430751	0.668946	0.440713	0.409606	0.525599	0.299622	0.416635	0.356568	0.597668	0.460679			8.6031	0.620482	0.460679	3.6	3.6	1.34689
										3.61	291.022	0.282885	206.497	0.118902		0.475824	1.10225	0.327225	0.663066	0.305361	0.742546	0.878263	0.861011	0.669443		0.351768	0.733349	0.482001	0.448097	0.495056	0.309008	0.449106	0.442295	0.507576	0.468695			8.6129	0.669443	0.468695	3.61	3.61	1.42831
										3.62	291.622	0.279151	206.951	0.0693419		0.484876	0.887136	0.228012	0.654594	0.247879	0.504584	0.893321	0.898818	0.599903		0.403805	0.498608	0.478064	0.526654	0.501917	0.295209	0.444124	0.462437	0.474493	0.453923			8.623	0.599903	0.453923	3.62	3.62	1.32159
										3.63	292.29	0.254832	207.387	0.120054		0.546936	1.02181	0.330369	0.717411	0.316014	0.751915	0.738127	0.9179	0.66756		0.358983	0.55977	0.467377	0.448985	0.496805	0.303305	0.634007	0.261248	0.392985	0.43594			8.6331	0.66756	0.43594	3.63	3.63	1.53131
										3.64	292.925	0.288532	207.818	0.0652028		0.515178	0.879795	0.245315	0.633766	0.260942	0.644837	0.862049	1.04126	0.635393		0.381569	0.405943	0.526314	0.435639	0.476438	0.306192	0.478949	0.407033	0.467377	0.431717			8.6429	0.635393	0.431717	3.64	3.64	1.47178
										3.65	293.531	0.285445	208.247	0.0728678		0.452882	0.93102	0.210107	0.505817	0.257604	0.870276	0.782893	0.834012	0.605576		0.38193	0.474588	0.546624	0.426441	0.516023	0.334025	0.426518	0.342265	0.414169	0.429176			8.6533	0.605576	0.429176	3.65	3.65	1.41102
										3.66	294.187	0.353591	208.711	0.121385		0.365712	1.06226	0.170379	0.736706	0.249406	0.696551	0.977942	0.992039	0.656374		0.367632	0.694409	0.476675	0.439019	0.539614	0.317546	0.540108	0.317344	0.479828	0.463575			8.6629	0.656374	0.463575	3.66	3.66	1.4159
										3.67	294.808	0.295621	209.164	0.122113		0.422447	0.995529	0.220278	0.669441	0.30852	0.568784	0.787386	0.99659	0.621122		0.395283	0.648551	0.492961	0.510529	0.494318	0.321257	0.558783	0.251883	0.407003	0.453396			8.6729	0.621122	0.453396	3.67	3.67	1.36993
										3.68	295.467	0.272848	209.609	0.103501		0.497124	1.00958	0.315474	0.703699	0.290152	0.692115	0.791403	0.970971	0.658815		0.404696	0.583875	0.492028	0.472329	0.505494	0.324858	0.531905	0.255253	0.431503	0.44466			8.6831	0.658815	0.44466	3.68	3.68	1.48162
										3.69	296.126	0.275834	210.065	0.128636		0.434617	1.01261	0.365611	0.735686	0.291988	0.70214	0.715999	1.01317	0.658978		0.402808	0.414436	0.478815	0.446166	0.522989	0.293468	0.749446	0.357195	0.435325	0.455627			8.693	0.658978	0.455627	3.69	3.69	1.44631
										3.7	296.751	0.28814	210.527	0.100962		0.393975	1.0314	0.256825	0.672089	0.283657	0.652853	0.819579	0.889038	0.624927		0.373786	0.654072	0.537854	0.42161	0.503083	0.306669	0.40734	0.467722	0.487554	0.462188			8.7032	0.624927	0.462188	3.7	3.7	1.35211
										3.71	297.413	0.270545	211.001	0.117853		0.601924	0.877021	0.275384	0.693917	0.29881	0.670993	0.8298	1.05173	0.662447		0.394507	0.588242	0.500559	0.536299	0.489511	0.3125	0.667868	0.323508	0.449427	0.473602			8.713	0.662447	0.473602	3.71	3.71	1.39874
										3.72	298.074	0.338918	211.475	0.120838		0.394902	1.15986	0.272672	0.626282	0.250993	0.7271	0.824633	1.02588	0.660291		0.406431	0.550732	0.507556	0.458012	0.522658	0.310055	0.713877	0.34023	0.456727	0.474031			8.7231	0.660291	0.474031	3.72	3.72	1.39293
										3.73	298.689	0.287436	211.923	0.0713621		0.422295	0.948015	0.229585	0.527795	0.28759	0.832931	0.740048	0.937225	0.615685		0.390588	0.544099	0.500063	0.456614	0.471945	0.319925	0.513315	0.384282	0.459375	0.448912			8.7328	0.615685	0.448912	3.73	3.73	1.37151
										3.74	299.327	0.296831	212.369	0.0688033		0.496064	0.9914	0.222238	0.626756	0.250757	0.723963	0.825638	0.963857	0.637584		0.420842	0.469267	0.451538	0.425259	0.536606	0.291237	0.508377	0.459694	0.445452	0.445363			8.7432	0.637584	0.445363	3.74	3.74	1.4316
										3.75	299.987	0.291736	212.801	0.0759784		0.473488	0.959711	0.245908	0.728468	0.2827	0.728324	0.962056	0.898192	0.659856		0.367917	0.46442	0.455954	0.454263	0.528514	0.300436	0.491891	0.345408	0.479387	0.432021			8.7528	0.659856	0.432021	3.75	3.75	1.52737
										3.76	300.592	0.233183	213.254	0.0800791		0.404416	0.822347	0.335156	0.703307	0.258285	0.723335	0.779337	0.819619	0.605725		0.422306	0.497257	0.523845	0.490966	0.537632	0.287238	0.38735	0.431965	0.503507	0.453563			8.763	0.605725	0.453563	3.76	3.76	1.33548
										3.77	301.248	0.269118	213.694	0.0815574		0.421091	0.898698	0.314226	0.764358	0.305228	0.74019	0.817931	0.984612	0.655792		0.331497	0.513212	0.452485	0.459415	0.526437	0.298407	0.520184	0.454236	0.402646	0.439835			8.7734	0.655792	0.439835	3.77	3.77	1.49099
										3.78	301.891	0.310009	214.183	0.112702		0.35733	1.01721	0.314558	0.64513	0.294446	0.677872	0.737172	1.10305	0.643346		0.430239	0.60834	0.470159	0.452951	0.553134	0.295591	0.647934	0.385615	0.558251	0.489135			8.7832	0.643346	0.489135	3.78	3.78	1.31527
										3.79	302.52	0.257193	214.625	0.0953333		0.471919	0.90426	0.275391	0.698129	0.277534	0.692107	0.806099	0.900854	0.628287		0.382766	0.472747	0.459288	0.495107	0.513865	0.304851	0.546284	0.283395	0.513648	0.441328			8.7929	0.628287	0.441328	3.79	3.79	1.42363
										3.8	303.161	0.266512	215.095	0.0875842		0.535356	0.933036	0.26684	0.69105	0.272497	0.668513	0.833144	0.932182	0.641577		0.391044	0.536896	0.515583	0.446171	0.538682	0.287215	0.496447	0.564417	0.453517	0.469997			8.803	0.641577	0.469997	3.8	3.8	1.36507
										3.81	303.785	0.234607	215.564	0.112007		0.543013	0.828995	0.273573	0.713842	0.276442	0.710884	0.834843	0.805754	0.623418		0.397562	0.608212	0.444897	0.435055	0.499693	0.307146	0.675936	0.439378	0.411469	0.468816			8.8129	0.623418	0.468816	3.81	3.81	1.32977
										3.82	304.423	0.302766	216.022	0.0865238		0.405921	0.800319	0.223852	0.655274	0.258538	0.945195	0.850347	0.963872	0.637915		0.401258	0.604124	0.473275	0.497907	0.547217	0.309251	0.409189	0.456659	0.425999	0.45832			8.8232	0.637915	0.45832	3.82	3.82	1.39186
										3.83	305.103	0.295507	216.514	0.101676		0.553492	0.91925	0.274717	0.731099	0.249539	0.777592	0.896767	1.03965	0.680264		0.431624	0.531471	0.488455	0.481233	0.479981	0.29459	0.551243	0.678399	0.490127	0.491903			8.833	0.680264	0.491903	3.83	3.83	1.38292
										3.84	305.704	0.264708	217.002	0.0862229		0.419637	0.887335	0.257044	0.644902	0.279353	0.626112	0.725103	0.969634	0.60114		0.396845	0.516144	0.565019	0.483513	0.535062	0.313195	0.591085	0.475073	0.517272	0.488134			8.8431	0.60114	0.488134	3.84	3.84	1.23151
										3.85	306.354	0.279208	217.454	0.0818498		0.463577	1.05791	0.341773	0.65401	0.268603	0.714637	0.744674	0.951552	0.649592		0.388745	0.554873	0.528248	0.41492	0.509912	0.310855	0.518308	0.387973	0.459299	0.45257			8.853	0.649592	0.45257	3.85	3.85	1.43534
										3.86	307.016	0.299808	217.921	0.0711757		0.46649	1.0576	0.298802	0.617242	0.261992	0.867289	0.768111	0.957204	0.661841		0.446453	0.569316	0.478613	0.504379	0.487798	0.305258	0.498947	0.464261	0.444979	0.466667			8.8632	0.661841	0.466667	3.86	3.86	1.41823
										3.87	307.664	0.264745	218.386	0.0873083		0.506991	0.881987	0.271057	0.671463	0.290874	0.762022	0.862617	0.942556	0.648696		0.413525	0.554169	0.466087	0.481134	0.517505	0.318291	0.411669	0.607431	0.412952	0.464751			8.8729	0.648696	0.464751	3.87	3.87	1.39579
										3.88	308.274	0.273119	218.888	0.107886		0.393212	0.904373	0.269197	0.667825	0.248108	0.657754	0.896342	0.841899	0.609839		0.418582	0.676515	0.43984	0.530998	0.506794	0.306948	0.571134	0.590111	0.482315	0.502582			8.883	0.609839	0.502582	3.88	3.88	1.21341
										3.89	308.881	0.27864	219.359	0.139407		0.409034	1.00327	0.253211	0.610708	0.253006	0.721503	0.750468	0.85815	0.607419		0.326779	0.431042	0.509577	0.61434	0.470513	0.318443	0.738927	0.344648	0.476253	0.470058			8.8929	0.607419	0.470058	3.89	3.89	1.29222
										3.9	309.539	0.278397	219.793	0.064199		0.520407	0.99876	0.245099	0.64466	0.306004	0.818113	0.819412	0.905453	0.657238		0.426759	0.45745	0.510109	0.419526	0.512304	0.311251	0.426048	0.375243	0.474736	0.434825			8.9033	0.657238	0.434825	3.9	3.9	1.5115
										3.91	310.178	0.264651	220.246	0.0836642		0.498731	0.788967	0.256225	0.711371	0.290917	0.720751	0.863701	0.982551	0.639152		0.36679	0.511288	0.461921	0.548211	0.510696	0.314863	0.548111	0.39163	0.424711	0.453136			8.9133	0.639152	0.453136	3.91	3.91	1.41051
										3.92	310.829	0.274888	220.727	0.109217		0.473235	1.11559	0.351385	0.645613	0.288801	0.693407	0.825178	0.819446	0.651582		0.370642	0.698615	0.491709	0.497678	0.530797	0.306162	0.498227	0.436642	0.494698	0.480574			8.923	0.651582	0.480574	3.92	3.92	1.35584
										3.93	311.479	0.299521	221.222	0.136097		0.404654	0.846634	0.223273	0.721698	0.290782	0.892904	0.807373	1.00929	0.649576		0.355109	0.57522	0.427633	0.448591	0.53178	0.318862	0.773243	0.461837	0.562712	0.494999			8.9331	0.649576	0.494999	3.93	3.93	1.31228
										3.94	312.072	0.231139	221.691	0.0951836		0.467963	0.75649	0.280636	0.650752	0.265744	0.672245	0.755675	0.89444	0.592993		0.379941	0.568866	0.496128	0.480496	0.53423	0.319313	0.606804	0.380219	0.455832	0.469092			8.9429	0.592993	0.469092	3.94	3.94	1.26413
										3.95	312.724	0.29836	222.141	0.0704119		0.486721	1.15663	0.32989	0.53013	0.286414	0.767625	0.747751	0.909619	0.651847		0.377952	0.500753	0.464141	0.417572	0.517192	0.310694	0.518203	0.44751	0.495452	0.449941			8.9534	0.651847	0.449941	3.95	3.95	1.44874
										3.96	313.359	0.262087	222.608	0.0908406		0.45041	0.917322	0.314463	0.687513	0.278004	0.656677	0.848079	0.932038	0.635563		0.366205	0.61213	0.516482	0.480567	0.491213	0.303957	0.532627	0.450735	0.44647	0.466709			8.9631	0.635563	0.466709	3.96	3.96	1.3618
										3.97	313.997	0.261845	223.072	0.0857517		0.525565	0.961128	0.276298	0.686289	0.268594	0.739565	0.735092	0.909156	0.637711		0.40606	0.606429	0.460166	0.472964	0.550223	0.310768	0.467179	0.49843	0.40939	0.464623			8.9732	0.637711	0.464623	3.97	3.97	1.37253
										3.98	314.631	0.317697	223.517	0.0984676		0.402606	0.980173	0.266994	0.62005	0.258216	0.604894	0.84292	1.09502	0.63386		0.407062	0.539324	0.502859	0.38734	0.494557	0.329584	0.594956	0.295663	0.445585	0.444103			8.983	0.63386	0.444103	3.98	3.98	1.42728
										3.99	315.233	0.234388	223.988	0.0976331		0.518176	0.933051	0.291963	0.640925	0.262267	0.673492	0.683099	0.809843	0.601602		0.387083	0.512192	0.474119	0.488146	0.507723	0.303694	0.569389	0.613876	0.382788	0.471001			8.9929	0.601602	0.471001	3.99	3.99	1.27728
																																									4	4

## Sheet: Fig. 7 A2,A3,A4, 100 Hz
			FIGURE 7A2					FIGURE 7 A3						FIGURE 7A4
		Position		RRP	RRP		Position			Probability Release				Position		Recycling Rate
		Jitter	Jitter	Control	Ansio		Jitter	Jitter		Control	Aniso			Jitter	Jitter	Control	Aniso
		0.95	2.2	23.2444	9.01794		0.95	1.7		0.369943	0.294514			0.89	2	67.5221	58.1484
		1.17	2.035	17.6895	21.8374		1.06657	2		0.428257	0.209796			1	2.15	73.6852	140.034
		0.96	2.1	12.4424	11.2466		1.02	1.9		0.607311	0.319454			1.05695	1.9	62.6457	43.2496
		1	1.84	16.8367	16.1647		1.01024	2		0.537328	0.434585			0.95	1.95	60.6431	104.935
		0.9	1.9	14.5594	9.97953		1.1	2.2		0.38285	0.238252			1.1	2.08031	69.9949	43.1234
		1	2.23	7.87702	16.1368		0.92	2.35		0.46249	0.298379			1	2.15	36.6191	103.125
		1.1	1.86	13.7358	20.5478		1.1	1.9		0.453813	0.271564			1.36	1.95	64.4939	133.08
		1.13021	2.24	21.6869	21.0253		1	2.1		0.266219	0.298042			1.23	2	67.9168	158.404
		0.83		17.7788			0.93			0.413836				0.8		61.0495
																pA/msec	pA/msec
			AVG	16.2057	15.7445				AVG	0.435783	0.295573				AVG	62.73	98.0124
			SEM	1.56791	1.82798				SEM	0.0327445	0.0235772				SEM	3.56436	15.9898
			TTEST	0.849845					TTEST	0.00399515					TTEST	0.0377547
			Avg Positions					Avg Positions							Avg Positions
			1	2.05				1	2.05						1.02	2.05
		Peak P1	Peak P1	Peak P1	Peak P1	Peak P1	Peak P1	Peak P1	Peak P1	Peak P1				Peak P1	Peak P1	Peak P1	Peak P1	Peak P1	Peak P1	Peak P1	Peak P1
		8.65521e-09	7.59544e-09	7.45548e-09	9.11895e-09	5.59482e-09	3.67407e-09	6.25604e-09	5.91107e-09	7.3866e-09				2.65592e-09	4.5814e-09	3.59278e-09	7.02495e-09	2.37765e-09	4.8149e-09	5.58005e-09	6.26644e-09
		intercept=RRP	intercept=RRP	intercept=RRP	intercept=RRP	intercept=RRP	intercept=RRP	intercept=RRP	intercept=RRP	intercept=RRP				intercept=RRP	intercept=RRP	intercept=RRP	intercept=RRP	intercept=RRP	intercept=RRP	intercept=RRP	intercept=RRP
	RRP	2.32444e-08	1.76895e-08	1.24424e-08	1.68367e-08	1.45594e-08	7.87702e-09	1.37358e-08	2.16869e-08	1.77788e-08			RRP	9.01794e-09	2.18374e-08	1.12466e-08	1.61647e-08	9.97953e-09	1.61368e-08	2.05478e-08	2.10253e-08
		Prob Release	Prob Release	Prob Release	Prob Release	Prob Release	Prob Release	Prob Release	Prob Release	Prob Release				Prob Release	Prob Release	Prob Release	Prob Release	Prob Release	Prob Release	Prob Release	Prob Release
	Pr	0.372358	0.429376	0.599198	0.541611	0.384276	0.466429	0.455456	0.272564	0.415472			Pr	0.294514	0.209796	0.319454	0.434585	0.238252	0.298379	0.271564	0.298042
		slope=Recyc.	slope=Recyc.	slope=Recyc.	slope=Recyc.	slope=Recyc.	slope=Recyc.	slope=Recyc.	slope=Recyc.	slope=Recyc.				slope=Recyc.	slope=Recyc.	slope=Recyc.	slope=Recyc.	slope=Recyc.	slope=Recyc.	slope=Recyc.	slope=Recyc.
	Recycle	6.75221e-11	7.36852e-11	6.26457e-11	6.06431e-11	6.99949e-11	3.66191e-11	6.44939e-11	6.79168e-11	6.10495e-11			Recycle	5.81484e-11	1.40034e-10	4.32496e-11	1.04935e-10	4.31234e-11	1.03125e-10	1.3308e-10	1.58404e-10
		Control	Control	Control	Control	Control	Control	Control	Control	Control				ANISO	ANISO	ANISO	ANISO	ANISO	ANISO	ANISO	ANISO
		-8.65521e-09	-7.59544e-09	-7.45548e-09	-9.11895e-09	-5.59482e-09	-3.67407e-09	-6.25604e-09	-5.91107e-09	-7.3866e-09				032917	040617	041717	042517	051617	051817	052517	052517
		032917	040617	041717	042517	051617	051617	051817	052517	052517				C6 AVG_Aniso	c4avg_ANISO	c4avg_ANISO	c4avg_ANISO	C4_AVG_ANISO	C8avg_Aniso	c3AVG_Aniso	c5AVG_ANISO
	msec	c6 Control	C2 AVG NORM	C2t9,12,17 AVG	C3 AVG	Control	C3 AVG	C3 AVG	c1t9	C2 trace avg	AVG		msec									AVG
	0	8.65521e-09	7.59544e-09	7.45548e-09	9.11895e-09	5.59482e-09	3.67407e-09	6.25604e-09	5.91107e-09	7.3866e-09	6.84974e-09		0	2.65592e-09	4.5814e-09	3.59278e-09	7.02495e-09	2.37765e-09	4.8149e-09	5.58005e-09	6.26644e-09	4.61176e-09
	10	1.5287e-08	1.1854e-08	1.03378e-08	1.2791e-08	9.96827e-09	5.88964e-09	9.71293e-09	1.05442e-08	1.14718e-08	1.08729e-08		10	5.42675e-09	9.0424e-09	6.75864e-09	1.11414e-08	5.26183e-09	9.57913e-09	1.0181e-08	1.12486e-08	8.57997e-09
	20	1.87308e-08	1.43485e-08	1.1815e-08	1.47563e-08	1.25123e-08	7.25892e-09	1.15507e-08	1.44387e-08	1.41057e-08	1.32796e-08		20	7.16578e-09	1.32181e-08	8.84613e-09	1.3687e-08	7.52948e-09	1.26531e-08	1.39845e-08	1.51176e-08	1.15252e-08
	30	2.11709e-08	1.62325e-08	1.29215e-08	1.61743e-08	1.42054e-08	7.99418e-09	1.29273e-08	1.73132e-08	1.59472e-08	1.49874e-08		30	8.61871e-09	1.67774e-08	1.01208e-08	1.57823e-08	8.8765e-09	1.55748e-08	1.71488e-08	1.84856e-08	1.39231e-08
	40	2.26923e-08	1.78247e-08	1.39404e-08	1.73428e-08	1.54538e-08	8.63169e-09	1.40509e-08	1.9343e-08	1.7388e-08	1.62964e-08		40	9.73266e-09	2.01181e-08	1.11318e-08	1.76065e-08	1.00531e-08	1.75379e-08	1.99155e-08	2.16039e-08	1.59624e-08
	50	2.4186e-08	1.89759e-08	1.48171e-08	1.83127e-08	1.66169e-08	9.18129e-09	1.52642e-08	2.09747e-08	1.87643e-08	1.74548e-08		50	1.06866e-08	2.25329e-08	1.19361e-08	1.9083e-08	1.08958e-08	1.91963e-08	2.28036e-08	2.43686e-08	1.76879e-08
	60	2.53606e-08	2.03257e-08	1.55954e-08	1.91186e-08	1.75915e-08	9.66684e-09	1.62662e-08	2.25489e-08	1.985e-08	1.84804e-08		60	1.16041e-08	2.50698e-08	1.28028e-08	2.06217e-08	1.16293e-08	2.07561e-08	2.49378e-08	2.69755e-08	1.92996e-08
	70	2.63824e-08	2.13356e-08	1.63672e-08	1.99659e-08	1.85427e-08	1.01359e-08	1.71173e-08	2.38399e-08	2.07968e-08	1.93871e-08		70	1.2358e-08	2.74077e-08	1.34593e-08	2.20107e-08	1.23007e-08	2.22798e-08	2.72297e-08	2.92381e-08	2.07855e-08
	80	2.72823e-08	2.23185e-08	1.72133e-08	2.08535e-08	1.94675e-08	1.06097e-08	1.80251e-08	2.51762e-08	2.1707e-08	2.02948e-08		80	1.31241e-08	2.96858e-08	1.40006e-08	2.34899e-08	1.28843e-08	2.3627e-08	2.91144e-08	3.14536e-08	2.21725e-08
	90	2.82607e-08	2.34354e-08	1.79042e-08	2.16724e-08	2.03581e-08	1.10203e-08	1.89261e-08	2.63255e-08	2.26202e-08	2.11692e-08		90	1.38511e-08	3.18569e-08	1.45874e-08	2.47869e-08	1.35097e-08	2.48123e-08	3.10061e-08	3.3503e-08	2.34892e-08
	100	2.92153e-08	2.4453e-08	1.85866e-08	2.24803e-08	2.12003e-08	1.14386e-08	1.96669e-08	2.75697e-08	2.35684e-08	2.20199e-08		100	1.45428e-08	3.40001e-08	1.51772e-08	2.60646e-08	1.4055e-08	2.59869e-08	3.29091e-08	3.55645e-08	2.47875e-08
	110	3.00781e-08	2.55255e-08	1.92371e-08	2.32041e-08	2.19635e-08	1.1841e-08	2.04083e-08	2.86285e-08	2.42747e-08	2.27956e-08		110	1.53031e-08	3.57742e-08	1.57373e-08	2.73192e-08	1.45867e-08	2.70668e-08	3.44845e-08	3.75221e-08	2.59743e-08
	120	3.09942e-08	2.62933e-08	1.98518e-08	2.38457e-08	2.28014e-08	1.22417e-08	2.12127e-08	2.95008e-08	2.48847e-08	2.3514e-08		120	1.59291e-08	3.78632e-08	1.62709e-08	2.84933e-08	1.50585e-08	2.81742e-08	3.59867e-08	3.92736e-08	2.71312e-08
	130	3.1842e-08	2.69787e-08	2.0495e-08	2.4569e-08	2.35625e-08	1.26248e-08	2.20396e-08	3.03418e-08	2.5553e-08	2.42229e-08		130	1.65189e-08	3.96697e-08	1.68158e-08	2.96569e-08	1.55693e-08	2.93227e-08	3.73545e-08	4.12023e-08	2.82638e-08
	140	3.26079e-08	2.79139e-08	2.12949e-08	2.52745e-08	2.43174e-08	1.29749e-08	2.27486e-08	3.0959e-08	2.63365e-08	2.49364e-08		140	1.71174e-08	4.12086e-08	1.73033e-08	3.07419e-08	1.60256e-08	3.04537e-08	3.88195e-08	4.30426e-08	2.93391e-08
	150	3.33759e-08	2.88326e-08	2.18567e-08	2.59371e-08	2.50522e-08	1.33641e-08	2.33311e-08	3.16801e-08	2.69101e-08	2.55933e-08		150	1.77383e-08	4.26507e-08	1.77752e-08	3.18315e-08	1.63927e-08	3.15641e-08	4.0282e-08	4.47209e-08	3.03694e-08
	160	3.40771e-08	2.94916e-08	2.24631e-08	2.65423e-08	2.57737e-08	1.37512e-08	2.39915e-08	3.26595e-08	2.74923e-08	2.62491e-08		160	1.83417e-08	4.41952e-08	1.81271e-08	3.2965e-08	1.68789e-08	3.26396e-08	4.19083e-08	4.64186e-08	3.14343e-08
	170	3.48347e-08	3.01859e-08	2.3084e-08	2.71248e-08	2.64773e-08	1.41176e-08	2.48183e-08	3.33454e-08	2.81011e-08	2.68988e-08		170	1.8922e-08	4.58937e-08	1.86356e-08	3.41289e-08	1.73063e-08	3.37718e-08	4.33969e-08	4.80899e-08	3.25182e-08
	180	3.544e-08	3.10531e-08	2.37004e-08	2.77855e-08	2.72101e-08	1.44849e-08	2.54662e-08	3.41837e-08	2.88336e-08	2.75731e-08		180	1.95171e-08	4.72888e-08	1.90476e-08	3.51249e-08	1.77834e-08	3.47645e-08	4.48044e-08	4.95701e-08	3.34876e-08
	190	3.60191e-08	3.17436e-08	2.42714e-08	2.84467e-08	2.78861e-08	1.48464e-08	2.60069e-08	3.47114e-08	2.94698e-08	2.81557e-08		190	2.00716e-08	4.85445e-08	1.94406e-08	3.61752e-08	1.81967e-08	3.57272e-08	4.60828e-08	5.11963e-08	3.44294e-08
	200	3.67123e-08	3.23081e-08	2.49156e-08	2.89867e-08	2.85519e-08	1.51895e-08	2.65526e-08	3.5346e-08	3.00151e-08	2.87309e-08		200	2.06156e-08	4.99788e-08	1.98218e-08	3.71837e-08	1.86065e-08	3.67697e-08	4.73331e-08	5.28248e-08	3.53917e-08
	210	3.74317e-08	3.30829e-08	2.55187e-08	2.95823e-08	2.92083e-08	1.55632e-08	2.73357e-08	3.59539e-08	3.06549e-08	2.93702e-08		210	2.11814e-08	5.12836e-08	2.03245e-08	3.81898e-08	1.90441e-08	3.79149e-08	4.85458e-08	5.42995e-08	3.63479e-08
	220	3.81023e-08	3.39064e-08	2.62172e-08	3.01096e-08	2.99149e-08	1.59343e-08	2.78865e-08	3.66649e-08	3.11675e-08	2.99893e-08		220	2.18837e-08	5.27624e-08	2.07449e-08	3.92399e-08	1.94819e-08	3.88901e-08	4.97663e-08	5.57801e-08	3.73187e-08
	230	3.87644e-08	3.46819e-08	2.6907e-08	3.07816e-08	3.06908e-08	1.63081e-08	2.85375e-08	3.71629e-08	3.17339e-08	3.06187e-08		230	2.24333e-08	5.38757e-08	2.12324e-08	4.02653e-08	1.99053e-08	3.97823e-08	5.09072e-08	5.74142e-08	3.8227e-08
	240	3.94437e-08	3.53865e-08	2.75673e-08	3.13768e-08	3.13599e-08	1.66469e-08	2.92109e-08	3.78353e-08	3.24454e-08	3.12525e-08		240	2.29054e-08	5.52019e-08	2.16515e-08	4.12795e-08	2.02812e-08	4.07581e-08	5.23169e-08	5.89851e-08	3.91724e-08
	250	4.00688e-08	3.61865e-08	2.81885e-08	3.1909e-08	3.20515e-08	1.69913e-08	2.9822e-08	3.83756e-08	3.29397e-08	3.1837e-08		250	2.35596e-08	5.66033e-08	2.21156e-08	4.23219e-08	2.06928e-08	4.17682e-08	5.35096e-08	6.06402e-08	4.01514e-08

## Sheet: Fig 7 B1
										aniso	aniso			Control	Control
										avg	avg			avg	avg
									time	cumulative	cumulative		time	cumulative	cumulative
									0	5.05362e-09	5.04556		0	7.00237e-09	7.00237
									0.005	9.00012e-09	9.05699		0.005	1.09632e-08	10.9632
									0.01	1.25523e-08	12.6735		0.01	1.34173e-08	13.4173
									0.015	1.50778e-08	15.2892		0.015	1.50172e-08	15.0172
									0.02	1.68888e-08	17.2047		0.02	1.62162e-08	16.2162
									0.025	1.86205e-08	18.9818		0.025	1.71698e-08	17.1698
									0.03	2.00663e-08	20.4778		0.03	1.80715e-08	18.0715
									0.035	2.11742e-08	21.6768		0.035	1.89085e-08	18.9085
									0.04	2.24059e-08	22.9538		0.04	1.96664e-08	19.6664
									0.045	2.33969e-08	23.9975		0.045	2.03941e-08	20.3941
									0.05	2.44267e-08	25.0645		0.05	2.10437e-08	21.0437
									0.055	2.54358e-08	26.0909		0.055	2.16846e-08	21.6846
									0.06	2.63494e-08	27.0322		0.06	2.22827e-08	22.2827
									0.065	2.7268e-08	27.966		0.065	2.28939e-08	22.8939
									0.07	2.81554e-08	28.8627		0.07	2.34566e-08	23.4566
									0.075	2.90124e-08	29.7314		0.075	2.40321e-08	24.0321
		SLOPE LINE							0.08	2.98989e-08	30.62		0.08	2.45721e-08	24.5721
		Control	Aniso						0.085	3.07126e-08	31.4597		0.085	2.5095e-08	25.095
	0	17.0148	18.7161	1.70127					0.09	3.14845e-08	32.242		0.09	2.56449e-08	25.6449
	0.15	31.3173	40.784						0.095	3.2262e-08	33.0288		0.095	2.61372e-08	26.1372
									0.1	3.30104e-08	33.7935		0.1	2.66466e-08	26.6466
									0.105	3.37813e-08	34.5687		0.105	2.71542e-08	27.1542
									0.11	3.44691e-08	35.2581		0.11	2.76429e-08	27.6429
									0.115	3.51865e-08	35.9897		0.115	2.8122e-08	28.122
									0.12	3.58894e-08	36.7042		0.12	2.86088e-08	28.6088
									0.125	3.6561e-08	37.3787		0.125	2.90559e-08	29.0559
									0.13	3.72538e-08	38.0948		0.13	2.94872e-08	29.4872
									0.135	3.791e-08	38.7811		0.135	2.99445e-08	29.9445
									0.14	3.85853e-08	39.4611		0.14	3.03791e-08	30.3791
									0.145	3.92464e-08	40.117		0.145	3.08399e-08	30.8399
									0.15	3.98993e-08	40.784		0.15	3.13173e-08	31.3173
									0.155	4.05775e-08	41.4723		0.155	3.1763e-08	31.763
									0.16	4.11753e-08	42.0888		0.16	3.22155e-08	32.2155
									0.165	4.18209e-08	42.7544		0.165	3.266e-08	32.66
									0.17	4.24293e-08	43.377		0.17	3.31173e-08	33.1173
									0.175	4.30595e-08	43.998		0.175	3.35594e-08	33.5594
									0.18	4.36562e-08	44.6178		0.18	3.4023e-08	34.023
									0.185	4.42723e-08	45.25		0.185	3.44738e-08	34.4738
									0.19	4.49278e-08	45.9188		0.19	3.49362e-08	34.9362
									0.195	4.55454e-08	46.5523		0.195	3.53937e-08	35.3937
									0.2	4.61421e-08	47.1624		0.2	3.58603e-08	35.8603
									0.205	4.6768e-08	47.7947		0.205	3.63013e-08	36.3013
									0.21	4.74099e-08	48.4605		0.21	3.67726e-08	36.7726
									0.215	4.80823e-08	49.1374		0.215	3.72395e-08	37.2395
									0.22	4.86897e-08	49.7545		0.22	3.76994e-08	37.6994
									0.225	4.93795e-08	50.4587		0.225	3.8145e-08	38.145
									0.23	5.00124e-08	51.1061		0.23	3.85704e-08	38.5704
									0.235	5.06472e-08	51.7521		0.235	3.90159e-08	39.0159
									0.24	5.12577e-08	52.3666		0.24	3.94651e-08	39.4651
									0.245	5.18935e-08	53.0112		0.245	3.99115e-08	39.9115
									0.25	5.24872e-08	53.6168		0.25	4.03882e-08	40.3882
									0.255	5.31405e-08	54.2704		0.255	4.08319e-08	40.8319
									0.26	5.37693e-08	54.9147		0.26	4.12849e-08	41.2849
									0.265	5.44361e-08	55.5928		0.265	4.17276e-08	41.7276
									0.27	5.50942e-08	56.2716		0.27	4.21902e-08	42.1902
									0.275	5.57868e-08	56.9658		0.275	4.26359e-08	42.6359
									0.28	5.63873e-08	57.5812		0.28	4.30885e-08	43.0885
									0.285	5.70131e-08	58.2123		0.285	4.35627e-08	43.5627
									0.29	5.76704e-08	58.8934		0.29	4.40096e-08	44.0096
									0.295	5.83421e-08	59.5696		0.295	4.44145e-08	44.4145
									0.3	5.89291e-08	60.1499		0.3	4.48998e-08	44.8998
									0.305	5.95821e-08	60.8178		0.305	4.53484e-08	45.3484
									0.31	6.01356e-08	61.3889		0.31	4.57971e-08	45.7971
									0.315	6.07197e-08	61.9962		0.315	4.62278e-08	46.2278
									0.32	6.13259e-08	62.5897		0.32	4.6676e-08	46.676
									0.325	6.19175e-08	63.2165		0.325	4.71452e-08	47.1452
									0.33	6.25341e-08	63.8509		0.33	4.76059e-08	47.6059
									0.335	6.31843e-08	64.5153		0.335	4.8028e-08	48.028
									0.34	6.37718e-08	65.1018		0.34	4.8454e-08	48.454
									0.345	6.44436e-08	65.7812		0.345	4.88974e-08	48.8974
									0.35	6.50566e-08	66.4001		0.35	4.93327e-08	49.3327
									0.355	6.56655e-08	67.0105		0.355	4.97665e-08	49.7665
									0.36	6.61998e-08	67.565		0.36	5.01803e-08	50.1803
									0.365	6.68346e-08	68.2185		0.365	5.0643e-08	50.643
									0.37	6.74635e-08	68.8744		0.37	5.10414e-08	51.0414
									0.375	6.8068e-08	69.4849		0.375	5.14705e-08	51.4705
									0.38	6.86794e-08	70.101		0.38	5.19028e-08	51.9028
									0.385	6.93109e-08	70.7476		0.385	5.23591e-08	52.3591
									0.39	6.98813e-08	71.3394		0.39	5.27919e-08	52.7919
									0.395	7.04632e-08	71.9288		0.395	5.32253e-08	53.2253

## Sheet: Fig 7 B2,B3,B4, 200 Hz
				FIGURE 7B2								FIGURE 7B3						FIGURE 7B4
					200HZ	200HZ						200HZ	200HZ						200HZ	200HZ
			Position		RRP	RRP				Position		Probability of Release					Position		Recycling Rate
			Jitter	Jitter	Control	Aniso				Jitter	Jitter	Control	Aniso				Jitter	Jitter	Control	Aniso
			0.85	2.16	22.7425	31.8583	2.19			1	2.03	0.291836	0.350735				0.9	2.12	130.593	227.765
			1	2.15	18.5525	19.1226	2.18			0.9	2.26	0.415043	0.294001				1	1.93	97.6873	216.643
			0.88	2.11115	12.1975	16.5777	2.14115			0.92	2.02	0.490004	0.268016				0.88	1.91	98.8498	138.996
			1	2.04	16.0563	9.76835	2.07			1	1.82	0.366448	0.281247				1.07	1.995	131.35	75.8233
			1.05	2.24	10.5478	13.782	2.27			1.26	2.03	0.430672	0.487991				1.05	2.16	76.8882	139.678
			1.375	2.05	16.7456	12.0755	2.08			1.15	1.85	0.478109	0.250374				1.25	1.93	93.7309	97.4096
			1.15	2.15103	12.6914	21.4809	2.18103			1.02	2.01103	0.548224	0.198862				1.15	2	98.8617	242.911
			0.66	2.26	17.1617	9.42986	2.29			0.73	2.21	0.429481	0.256846				0.75	2.135	93.178	93.3673
			1.12	2.21027	24.4107		2.24027			1.08	2.07027	0.407459					0.786	2.07027	104.23
				AVG	16.7895	16.7619					AVG	0.428586	0.298509					AVG	102.819	154.074
				SEM	1.55522	2.63658					SEM	0.0246459	0.031013					SEM	5.88439	23.4106
				TTEST	0.992719						TTEST	0.00467569						TTEST	0.0404551
					1	2.15													1	2
		peak P1	peak P2	peak P3	peak P4	peak P5	peak P6	peak P7	peak P8	peak P9		Ratio		Peak P1	Peak P1	Peak P2	Peak P3	Peak P4	Peak P5	Peak P6	Peak P7	Peak P8
		6.63708e-09	7.70008e-09	5.97682e-09	5.88379e-09	4.54264e-09	8.00622e-09	6.95772e-09	7.37061e-09	9.94637e-09	7.00237e-09	0.720551	5.04556e-09	4.98113e-09	1.11738e-08	5.62206e-09	4.44309e-09	2.74732e-09	6.72551e-09	3.02338e-09	4.27175e-09	2.42202e-09
		Intercept = RRP	Intercept = RRP	Intercept = RRP	Intercept = RRP	Intercept = RRP	Intercept = RRP	Intercept = RRP	Intercept = RRP	Intercept = RRP	Avg Control	Ratio	Avg Aniso	Intercept = RRP	Intercept = RRP	Intercept = RRP	Intercept = RRP	Intercept = RRP	Intercept = RRP	Intercept = RRP	Intercept = RRP	Intercept = RRP
	RRP	2.27425e-08	1.85525e-08	1.21975e-08	1.60563e-08	1.05478e-08	1.67456e-08	1.26914e-08	1.71617e-08	2.44107e-08	1.67895e-08	1.031	1.731e-08	2.16946e-08	3.18583e-08	1.91226e-08	1.65777e-08	9.76835e-09	1.3782e-08	1.20755e-08	2.14809e-08	9.42986e-09
		Prob Release	Prob Release	Prob Release	Prob Release	Prob Release	Prob Release	Prob Release	Prob Release	Prob Release		Ratio		Prob Release	Prob Release	Prob Release	Prob Release	Prob Release	Prob Release	Prob Release	Prob Release	Prob Release
	Pr	0.291836	0.415043	0.490004	0.366448	0.430672	0.478109	0.548224	0.429481	0.407459	0.428586	0.678633	0.290853	0.229603	0.350735	0.294001	0.268016	0.281247	0.487991	0.250374	0.198862	0.256846
		slope=Recyc.	slope=Recyc.	slope=Recyc.	slope=Recyc.	slope=Recyc.	slope=Recyc.	slope=Recyc.	slope=Recyc.	slope=Recyc.		Ratio		Recycle Rate	Recycle Rate	Recycle Rate	Recycle Rate	Recycle Rate	Recycle Rate	Recycle Rate	Recycle Rate	Recycle Rate
	Recycle	1.15133e-07	9.07338e-08	9.67406e-08	1.27375e-07	7.48796e-08	9.30892e-08	9.67277e-08	8.89395e-08	1.02076e-07	9.84104e-08	1.51347	1.48941e-07	1.6707e-07	2.10991e-07	2.06774e-07	1.35292e-07	7.37098e-08	1.37271e-07	9.43841e-08	2.25629e-07	8.93485e-08
		control	control	control	control	control	control	control	control	control		ttest		Aniso	Aniso	Aniso	Aniso	Aniso	Aniso	Aniso	Aniso	Aniso
		052517	052517	051817	051617	051617	042517	041717	040617	032917		0.0762092		052517	052517	052517	051817	051617	042517	041717	040617	032917
		c1t5	c2AVG	c3AVG	c1 AVG	c3_AVG	c3_AVG	c2 AVG	c2_AVG	c1t18				c3 AVG	c4t5	c5 AVG	c8_AVG	c4_AVG	c4_AVG	c4_AVG	c4t5	c6_AVG
		control	control	control	control	control	control	control	control	control				Aniso	Aniso	Aniso	Aniso	Aniso	Aniso	Aniso	Aniso	Aniso
stim #	time	EventAmp	AVG AMP	AVG AMP	AVG AMP	AVG AMP	AVG AMP	AVG AMP	AVG AMP	EventAmp				EventAmp	EventAmp	AVG AMP	AVG AMP	AVG AMP	AVG AMP	AVG AMP	AVG AMP	AVG AMP
1	0.005	6.63708e-09	7.70008e-09	5.97682e-09	5.88379e-09	4.54264e-09	8.00622e-09	6.95772e-09	7.37061e-09	9.94637e-09	7.00237e-09	1	0.005	4.98113e-09	1.11738e-08	5.62206e-09	4.44309e-09	2.74732e-09	6.72551e-09	3.02338e-09	4.27175e-09	2.42202e-09	5.04556e-09
2	0.01	1.14782e-08	1.23038e-08	9.48914e-09	1.17386e-08	8.17044e-09	1.27707e-08	1.0285e-08	1.14699e-08	1.75107e-08		2	0.01	9.512e-09	1.88248e-08	1.06276e-08	9.63235e-09	5.99401e-09	6.92559e-09	6.40052e-09	8.5066e-09	5.08943e-09
3	0.015	1.5352e-08	1.51209e-08	1.11612e-08	1.47811e-08	1.01323e-08	1.49417e-08	1.18628e-08	1.39865e-08	2.10541e-08		3	0.015	1.3643e-08	2.39624e-08	1.42389e-08	1.33942e-08	8.21351e-09	1.09189e-08	9.13353e-09	1.30714e-08	7.48525e-09
4	0.02	1.85325e-08	1.67422e-08	1.23549e-08	1.64972e-08	1.10748e-08	1.64212e-08	1.29784e-08	1.55361e-08	2.31532e-08		4	0.02	1.698e-08	2.7716e-08	1.71168e-08	1.57731e-08	9.76765e-09	1.36089e-08	1.09954e-08	1.6556e-08	9.08873e-09
5	0.025	2.09489e-08	1.80599e-08	1.33303e-08	1.77181e-08	1.17202e-08	1.73542e-08	1.38232e-08	1.6775e-08	2.47186e-08		5	0.025	1.97315e-08	3.06974e-08	1.96113e-08	1.75205e-08	1.06936e-08	1.43921e-08	1.22699e-08	1.97102e-08	1.02157e-08
6	0.03	2.27844e-08	1.91002e-08	1.41239e-08	1.86862e-08	1.22796e-08	1.82021e-08	1.45376e-08	1.76443e-08	2.58129e-08		6	0.03	2.18725e-08	3.3516e-08	2.17103e-08	1.89979e-08	1.13824e-08	1.63596e-08	1.32907e-08	2.25691e-08	1.1138e-08
7	0.035	2.44301e-08	2.00999e-08	1.47959e-08	1.96414e-08	1.27954e-08	1.89386e-08	1.52588e-08	1.86118e-08	2.67164e-08		7	0.035	2.37697e-08	3.57254e-08	2.34839e-08	2.00131e-08	1.19854e-08	1.80338e-08	1.41872e-08	2.5255e-08	1.18468e-08
8	0.04	2.58723e-08	2.10161e-08	1.55306e-08	2.05077e-08	1.3272e-08	1.97057e-08	1.59763e-08	1.93873e-08	2.7575e-08		8	0.04	2.56979e-08	3.72345e-08	2.52398e-08	2.10908e-08	1.25191e-08	1.82398e-08	1.5004e-08	2.75293e-08	1.2536e-08
9	0.045	2.69628e-08	2.17766e-08	1.61645e-08	2.13206e-08	1.3747e-08	2.0445e-08	1.66261e-08	2.02889e-08	2.83775e-08		9	0.045	2.73367e-08	3.90901e-08	2.69244e-08	2.20366e-08	1.30111e-08	1.97491e-08	1.56892e-08	2.96286e-08	1.31183e-08
10	0.05	2.81007e-08	2.25579e-08	1.6775e-08	2.21225e-08	1.41941e-08	2.1088e-08	1.7267e-08	2.10479e-08	2.90635e-08		10	0.05	2.88025e-08	4.09058e-08	2.8442e-08	2.3004e-08	1.34966e-08	1.99473e-08	1.63475e-08	3.13281e-08	1.37038e-08
11	0.055	2.90211e-08	2.32198e-08	1.73389e-08	2.28863e-08	1.4633e-08	2.16929e-08	1.78464e-08	2.17116e-08	2.97507e-08		11	0.055	3.0167e-08	4.24759e-08	2.97671e-08	2.38056e-08	1.38456e-08	2.11983e-08	1.69694e-08	3.31066e-08	1.42451e-08
12	0.06	2.98729e-08	2.39207e-08	1.79008e-08	2.36775e-08	1.50663e-08	2.223e-08	1.84378e-08	2.23708e-08	3.03407e-08		12	0.06	3.13312e-08	4.40666e-08	3.11861e-08	2.46682e-08	1.42469e-08	2.21585e-08	1.75354e-08	3.48282e-08	1.47968e-08
13	0.065	3.06986e-08	2.46157e-08	1.84739e-08	2.44089e-08	1.54738e-08	2.27621e-08	1.89785e-08	2.28501e-08	3.09601e-08		13	0.065	3.24942e-08	4.55969e-08	3.25073e-08	2.54421e-08	1.46514e-08	2.27665e-08	1.8101e-08	3.63677e-08	1.53625e-08
14	0.07	3.16264e-08	2.51674e-08	1.90229e-08	2.51242e-08	1.58806e-08	2.32402e-08	1.95398e-08	2.35493e-08	3.15731e-08		14	0.07	3.355e-08	4.71881e-08	3.38415e-08	2.61518e-08	1.50651e-08	2.35943e-08	1.86988e-08	3.77369e-08	1.58675e-08
15	0.075	3.23387e-08	2.57816e-08	1.9597e-08	2.58351e-08	1.62914e-08	2.37373e-08	2.00745e-08	2.3997e-08	3.21874e-08		15	0.075	3.45211e-08	4.85576e-08	3.52029e-08	2.69446e-08	1.54492e-08	2.41789e-08	1.93202e-08	3.92089e-08	1.63807e-08
16	0.08	3.31518e-08	2.6289e-08	2.01347e-08	2.65595e-08	1.6683e-08	2.42532e-08	2.05861e-08	2.45998e-08	3.27256e-08		16	0.08	3.54841e-08	4.9856e-08	3.64047e-08	2.76366e-08	1.58225e-08	2.49727e-08	1.98373e-08	4.06917e-08	1.68775e-08
17	0.085	3.38278e-08	2.69061e-08	2.05866e-08	2.7232e-08	1.70631e-08	2.47606e-08	2.11011e-08	2.50991e-08	3.32577e-08		17	0.085	3.63886e-08	5.13787e-08	3.75089e-08	2.84224e-08	1.62105e-08	2.56671e-08	2.0362e-08	4.22621e-08	1.73796e-08
18	0.09	3.45107e-08	2.7377e-08	2.10829e-08	2.7887e-08	1.74745e-08	2.52181e-08	2.16152e-08	2.55942e-08	3.37947e-08		18	0.09	3.74367e-08	5.26414e-08	3.86832e-08	2.90922e-08	1.65643e-08	2.64413e-08	2.08824e-08	4.35611e-08	1.78346e-08
19	0.095	3.53151e-08	2.78988e-08	2.15876e-08	2.85678e-08	1.78735e-08	2.56365e-08	2.20936e-08	2.61862e-08	3.43217e-08		19	0.095	3.83013e-08	5.36792e-08	3.98307e-08	2.98269e-08	1.69639e-08	2.69655e-08	2.13575e-08	4.49321e-08	1.83205e-08
20	0.1	3.59089e-08	2.838e-08	2.20871e-08	2.92365e-08	1.82811e-08	2.61144e-08	2.25793e-08	2.65103e-08	3.49148e-08		20	0.1	3.91636e-08	5.47769e-08	4.08802e-08	3.05447e-08	1.73895e-08	2.78412e-08	2.18481e-08	4.60103e-08	1.88047e-08
21	0.105	3.65799e-08	2.8892e-08	2.25475e-08	2.98766e-08	1.86523e-08	2.65471e-08	2.30844e-08	2.69933e-08	3.5412e-08		21	0.105	4.00581e-08	5.59114e-08	4.19718e-08	3.12414e-08	1.77638e-08	2.83916e-08	2.23287e-08	4.72065e-08	1.92682e-08
22	0.11	3.71787e-08	2.93367e-08	2.31139e-08	3.05446e-08	1.90171e-08	2.70443e-08	2.36027e-08	2.73956e-08	3.58829e-08		22	0.11	4.08682e-08	5.70065e-08	4.30399e-08	3.1913e-08	1.81367e-08	2.92384e-08	2.28387e-08	4.83428e-08	1.97344e-08
23	0.115	3.78254e-08	2.97746e-08	2.35872e-08	3.11593e-08	1.93869e-08	2.75146e-08	2.40566e-08	2.78385e-08	3.64049e-08		23	0.115	4.15698e-08	5.81004e-08	4.40932e-08	3.25006e-08	1.85092e-08	2.98028e-08	2.32867e-08	4.92522e-08	2.02081e-08
24	0.12	3.8378e-08	3.02128e-08	2.40453e-08	3.17778e-08	1.97555e-08	2.79715e-08	2.45391e-08	2.82962e-08	3.68889e-08		24	0.12	4.24155e-08	5.90184e-08	4.50212e-08	3.32122e-08	1.88408e-08	3.05641e-08	2.37288e-08	5.05182e-08	2.05884e-08
25	0.125	3.88042e-08	3.06846e-08	2.45373e-08	3.24277e-08	2.01241e-08	2.85081e-08	2.50204e-08	2.87638e-08	3.73804e-08		25	0.125	4.32222e-08	6.00563e-08	4.60189e-08	3.39156e-08	1.9207e-08	3.1185e-08	2.41905e-08	5.15062e-08	2.10358e-08
26	0.13	3.92551e-08	3.11116e-08	2.50225e-08	3.30387e-08	2.0482e-08	2.89461e-08	2.54597e-08	2.91311e-08	3.78937e-08		26	0.13	4.39201e-08	6.08554e-08	4.69766e-08	3.45232e-08	1.95782e-08	3.19516e-08	2.46312e-08	5.25325e-08	2.14391e-08
27	0.135	3.97043e-08	3.14625e-08	2.54474e-08	3.36139e-08	2.08489e-08	2.93525e-08	2.59549e-08	2.95131e-08	3.8384e-08		27	0.135	4.48231e-08	6.20041e-08	4.79285e-08	3.517e-08	1.99089e-08	3.25042e-08	2.50599e-08	5.3573e-08	2.18816e-08
28	0.14	4.02008e-08	3.17947e-08	2.59246e-08	3.42055e-08	2.11917e-08	2.98258e-08	2.64204e-08	2.99925e-08	3.89072e-08		28	0.14	4.57493e-08	6.28387e-08	4.89291e-08	3.58107e-08	2.02719e-08	3.32497e-08	2.54961e-08	5.44114e-08	2.22726e-08
29	0.145	4.05808e-08	3.22304e-08	2.639e-08	3.48087e-08	2.15381e-08	3.02542e-08	2.68379e-08	3.0393e-08	3.93825e-08		29	0.145	4.64671e-08	6.3692e-08	4.98769e-08	3.64817e-08	2.06077e-08	3.38235e-08	2.60197e-08	5.54834e-08	2.26973e-08
30	0.15	4.10007e-08	3.26016e-08	2.68196e-08	3.54361e-08	2.19273e-08	3.07829e-08	2.73708e-08	3.07804e-08	3.98397e-08		30	0.15	4.70823e-08	6.45664e-08	5.07458e-08	3.71316e-08	2.09584e-08	3.4511e-08	2.64659e-08	5.65135e-08	2.30781e-08
31	0.155	4.15521e-08	3.30142e-08	2.72812e-08	3.60296e-08	2.23048e-08	3.11942e-08	2.78941e-08	3.12682e-08	4.03124e-08		31	0.155	4.78616e-08	6.56286e-08	5.16461e-08	3.78024e-08	2.12903e-08	3.49919e-08	2.69065e-08	5.74484e-08	2.34802e-08
32	0.16	4.20654e-08	3.33592e-08	2.77364e-08	3.66267e-08	2.26852e-08	3.16032e-08	2.83143e-08	3.17133e-08	4.08052e-08		32	0.16	4.8631e-08	6.679e-08	5.25432e-08	3.84093e-08	2.16583e-08	3.56835e-08	2.72806e-08	5.83903e-08	2.38647e-08
33	0.165	4.24566e-08	3.37176e-08	2.81986e-08	3.72353e-08	2.30455e-08	3.20819e-08	2.88066e-08	3.21822e-08	4.12605e-08		33	0.165	4.93969e-08	6.76215e-08	5.33561e-08	3.90087e-08	2.1976e-08	3.62171e-08	2.76824e-08	5.92549e-08	2.42857e-08
34	0.17	4.28403e-08	3.4091e-08	2.86834e-08	3.78134e-08	2.34075e-08	3.2524e-08	2.92529e-08	3.26678e-08	4.17333e-08		34	0.17	5.02227e-08	6.87221e-08	5.41899e-08	3.96316e-08	2.23313e-08	3.68666e-08	2.81758e-08	5.99228e-08	2.47268e-08
35	0.175	4.34603e-08	3.44126e-08	2.91886e-08	3.84243e-08	2.37439e-08	3.29445e-08	2.97932e-08	3.29709e-08	4.22304e-08		35	0.175	5.09584e-08	6.96621e-08	5.49976e-08	4.02442e-08	2.2605e-08	3.73917e-08	2.86509e-08	6.07777e-08	2.5105e-08
36	0.18	4.38215e-08	3.47953e-08	2.96619e-08	3.90538e-08	2.40931e-08	3.33608e-08	3.02863e-08	3.34029e-08	4.27468e-08		36	0.18	5.15063e-08	7.05067e-08	5.59021e-08	4.08551e-08	2.29009e-08	3.80652e-08	2.9117e-08	6.16242e-08	2.55045e-08
37	0.185	4.42632e-08	3.52238e-08	3.0125e-08	3.96767e-08	2.44556e-08	3.38191e-08	3.07517e-08	3.38688e-08	4.32882e-08		37	0.185	5.23103e-08	7.12272e-08	5.67026e-08	4.14896e-08	2.32739e-08	3.85745e-08	2.94376e-08	6.26445e-08	2.59e-08
38	0.19	4.46849e-08	3.56231e-08	3.05259e-08	4.03511e-08	2.47976e-08	3.41823e-08	3.12513e-08	3.43742e-08	4.37785e-08		38	0.19	5.3072e-08	7.19241e-08	5.75845e-08	4.20787e-08	2.35773e-08	3.93452e-08	2.99498e-08	6.34358e-08	2.62831e-08
39	0.195	4.51883e-08	3.60332e-08	3.0983e-08	4.09652e-08	2.51466e-08	3.47173e-08	3.16855e-08	3.47702e-08	4.426e-08		39	0.195	5.38464e-08	7.27343e-08	5.85239e-08	4.27369e-08	2.39002e-08	3.99112e-08	3.04726e-08	6.4442e-08	2.67015e-08
40	0.2	4.55801e-08	3.64458e-08	3.14941e-08	4.15818e-08	2.54954e-08	3.51347e-08	3.21964e-08	3.52213e-08	4.4749e-08		40	0.2	5.46079e-08	7.35578e-08	5.94039e-08	4.33217e-08	2.42861e-08	4.05713e-08	3.09397e-08	6.5219e-08	2.70635e-08
41	0.205	4.59731e-08	3.68928e-08	3.20175e-08	4.21626e-08	2.58442e-08	3.56102e-08	3.26087e-08	3.57735e-08	4.52311e-08		41	0.205	5.53242e-08	7.43512e-08	6.02989e-08	4.38876e-08	2.46083e-08	4.10515e-08	3.13343e-08	6.61932e-08	2.7412e-08
42	0.21	4.63898e-08	3.72178e-08	3.24557e-08	4.27605e-08	2.61978e-08	3.60278e-08	3.31644e-08	3.61966e-08	4.57014e-08		42	0.21	5.60081e-08	7.51684e-08	6.1221e-08	4.44938e-08	2.50212e-08	4.18135e-08	3.17519e-08	6.68705e-08	2.78037e-08
43	0.215	4.69157e-08	3.7608e-08	3.28857e-08	4.33354e-08	2.65525e-08	3.64982e-08	3.36907e-08	3.6695e-08	4.61524e-08		43	0.215	5.68649e-08	7.6033e-08	6.21742e-08	4.51248e-08	2.53559e-08	4.23561e-08	3.2291e-08	6.76907e-08	2.82536e-08
44	0.22	4.74196e-08	3.80247e-08	3.34225e-08	4.39111e-08	2.69058e-08	3.69074e-08	3.41109e-08	3.72139e-08	4.67131e-08		44	0.22	5.75783e-08	7.7105e-08	6.29934e-08	4.57648e-08	2.57292e-08	4.30576e-08	3.26303e-08	6.86871e-08	2.86913e-08
45	0.225	4.78793e-08	3.84644e-08	3.38951e-08	4.44907e-08	2.72804e-08	3.73196e-08	3.4551e-08	3.77146e-08	4.72183e-08		45	0.225	5.82734e-08	7.80244e-08	6.38584e-08	4.63988e-08	2.60505e-08	4.35105e-08	3.30331e-08	6.95548e-08	2.9087e-08
46	0.23	4.8301e-08	3.88512e-08	3.44294e-08	4.50899e-08	2.76048e-08	3.77323e-08	3.50327e-08	3.81184e-08	4.76655e-08		46	0.23	5.9093e-08	7.92636e-08	6.46811e-08	4.71267e-08	2.64093e-08	4.41989e-08	3.35482e-08	7.03233e-08	2.94846e-08
47	0.235	4.86772e-08	3.92427e-08	3.48603e-08	4.56787e-08	2.79451e-08	3.8174e-08	3.55094e-08	3.84756e-08	4.80879e-08		47	0.235	5.98552e-08	8.00178e-08	6.57306e-08	4.77681e-08	2.67737e-08	4.4768e-08	3.4065e-08	7.1061e-08	2.99152e-08
48	0.24	4.91669e-08	3.96497e-08	3.53394e-08	4.62418e-08	2.83079e-08	3.86003e-08	3.58556e-08	3.89659e-08	4.85264e-08		48	0.24	6.05911e-08	8.09727e-08	6.66639e-08	4.843e-08	2.71289e-08	4.54839e-08	3.43641e-08	7.18744e-08	3.02598e-08
49	0.245	4.96272e-08	4.00636e-08	3.57699e-08	4.68145e-08	2.86335e-08	3.90214e-08	3.63882e-08	3.94027e-08	4.91244e-08		49	0.245	6.12379e-08	8.18684e-08	6.74967e-08	4.90552e-08	2.75193e-08	4.59766e-08	3.4972e-08	7.24931e-08	3.06805e-08
50	0.25	5.01474e-08	4.04425e-08	3.62788e-08	4.74024e-08	2.89584e-08	3.94285e-08	3.68274e-08	3.98066e-08	4.9616e-08		50	0.25	6.1953e-08	8.26544e-08	6.8362e-08	4.95911e-08	2.78623e-08	4.66832e-08	3.55735e-08	7.33374e-08	3.1084e-08
51	0.255	5.05685e-08	4.08237e-08	3.67802e-08	4.79953e-08	2.92956e-08	3.98801e-08	3.73745e-08	4.03877e-08	5.00539e-08		51	0.255	6.26538e-08	8.34479e-08	6.91964e-08	5.01391e-08	2.82229e-08	4.71537e-08	3.59973e-08	7.41715e-08	3.15685e-08
52	0.26	5.10881e-08	4.12996e-08	3.72297e-08	4.85643e-08	2.96157e-08	4.02868e-08	3.7765e-08	4.0806e-08	5.0554e-08		52	0.26	6.331e-08	8.43884e-08	7.01771e-08	5.0701e-08	2.86106e-08	4.78079e-08	3.63804e-08	7.50217e-08	3.20367e-08
53	0.265	5.14687e-08	4.16315e-08	3.77466e-08	4.91359e-08	2.99474e-08	4.06974e-08	3.83257e-08	4.13258e-08	5.10499e-08		53	0.265	6.40782e-08	8.51389e-08	7.10715e-08	5.1337e-08	2.89586e-08	4.82978e-08	3.69021e-08	7.60269e-08	3.24219e-08
54	0.27	5.18842e-08	4.2078e-08	3.81634e-08	4.96894e-08	3.0307e-08	4.11368e-08	3.87256e-08	4.18366e-08	5.1542e-08		54	0.27	6.48464e-08	8.60197e-08	7.21075e-08	5.19354e-08	2.9318e-08	4.89429e-08	3.73468e-08	7.69499e-08	3.28682e-08
55	0.275	5.22274e-08	4.25237e-08	3.86881e-08	5.02252e-08	3.06324e-08	4.16708e-08	3.9254e-08	4.23002e-08	5.20291e-08		55	0.275	6.56914e-08	8.72202e-08	7.31805e-08	5.26002e-08	2.96158e-08	4.9379e-08	3.7665e-08	7.78818e-08	3.3211e-08
56	0.28	5.26678e-08	4.29205e-08	3.91266e-08	5.07895e-08	3.10096e-08	4.2099e-08	3.96264e-08	4.28481e-08	5.24939e-08		56	0.28	6.63979e-08	8.82262e-08	7.40956e-08	5.32053e-08	2.99474e-08	5.00516e-08	3.82029e-08	7.87812e-08	3.3784e-08
57	0.285	5.31836e-08	4.332e-08	3.95955e-08	5.1362e-08	3.13595e-08	4.24801e-08	4.0141e-08	4.32667e-08	5.29717e-08		57	0.285	6.71324e-08	8.90926e-08	7.5028e-08	5.38208e-08	3.03286e-08	5.05371e-08	3.84877e-08	7.96268e-08	3.41765e-08
58	0.29	5.37132e-08	4.37909e-08	4.00876e-08	5.19765e-08	3.17033e-08	4.29404e-08	4.04971e-08	4.37924e-08	5.34133e-08		58	0.29	6.78055e-08	9.00245e-08	7.58633e-08	5.4492e-08	3.06995e-08	5.1225e-08	3.8956e-08	8.02249e-08	3.46201e-08
59	0.295	5.41573e-08	4.41699e-08	4.05354e-08	5.25326e-08	3.20633e-08	4.33646e-08	4.10375e-08	4.42162e-08	5.39235e-08		59	0.295	6.86775e-08	9.09645e-08	7.68528e-08	5.50913e-08	3.10048e-08	5.17588e-08	3.9363e-08	8.13493e-08	3.49787e-08
60	0.3	5.44494e-08	4.45823e-08	4.09314e-08	5.30772e-08	3.2413e-08	4.37818e-08	4.13783e-08	4.47024e-08	5.4352e-08		60	0.3	6.93895e-08	9.2021e-08	7.77962e-08	5.56658e-08	3.13478e-08	5.25408e-08	3.97848e-08	8.22173e-08	3.53629e-08
61	0.305	5.49553e-08	4.50086e-08	4.13666e-08	5.36619e-08	3.27458e-08	4.42447e-08	4.19807e-08	4.52349e-08	5.48472e-08		61	0.305	6.99169e-08	9.28824e-08	7.86135e-08	5.62082e-08	3.16967e-08	5.30304e-08	4.01693e-08	8.30725e-08	3.57594e-08
62	0.31	5.54076e-08	4.54016e-08	4.17894e-08	5.42381e-08	3.31224e-08	4.46679e-08	4.24471e-08	4.57128e-08	5.53344e-08		62	0.31	7.07035e-08	9.38193e-08	7.94866e-08	5.67776e-08	3.20321e-08	5.38453e-08	4.06563e-08	8.38741e-08	3.61653e-08
63	0.315	5.5762e-08	4.5799e-08	4.23238e-08	5.47853e-08	3.34691e-08	4.50476e-08	4.29598e-08	4.62297e-08	5.58471e-08		63	0.315	7.14157e-08	9.45385e-08	8.02394e-08	5.73328e-08	3.23726e-08	5.43025e-08	4.11282e-08	8.46779e-08	3.64926e-08
64	0.32	5.61738e-08	4.62088e-08	4.27442e-08	5.53727e-08	3.38163e-08	4.54755e-08	4.3442e-08	4.65895e-08	5.63067e-08		64	0.32	7.22083e-08	9.54049e-08	8.11465e-08	5.79816e-08	3.26808e-08	5.49673e-08	4.14695e-08	8.52445e-08	3.68626e-08
65	0.325	5.65986e-08	4.66049e-08	4.32105e-08	5.59435e-08	3.4179e-08	4.59674e-08	4.38727e-08	4.70314e-08	5.67471e-08		65	0.325	7.27001e-08	9.63984e-08	8.19833e-08	5.85219e-08	3.29722e-08	5.54002e-08	4.20341e-08	8.60585e-08	3.72383e-08
66	0.33	5.71655e-08	4.70599e-08	4.36043e-08	5.65256e-08	3.45077e-08	4.63996e-08	4.43542e-08	4.75452e-08	5.71295e-08		66	0.33	7.36085e-08	9.70803e-08	8.2831e-08	5.90801e-08	3.34113e-08	5.60647e-08	4.24547e-08	8.68109e-08	3.7607e-08
67	0.335	5.76322e-08	4.74756e-08	4.40814e-08	5.70733e-08	3.48603e-08	4.68637e-08	4.48821e-08	4.79786e-08	5.76154e-08		67	0.335	7.43858e-08	9.8072e-08	8.36873e-08	5.96608e-08	3.37642e-08	5.65985e-08	4.2914e-08	8.75975e-08	3.79783e-08
68	0.34	5.80751e-08	4.78228e-08	4.4503e-08	5.76275e-08	3.52008e-08	4.72746e-08	4.53289e-08	4.83917e-08	5.80477e-08		68	0.34	7.51636e-08	9.89066e-08	8.44448e-08	6.02898e-08	3.41109e-08	5.72007e-08	4.35522e-08	8.85605e-08	3.84088e-08
69	0.345	5.8422e-08	4.82566e-08	4.4972e-08	5.81683e-08	3.55644e-08	4.76577e-08	4.58254e-08	4.87654e-08	5.85304e-08		69	0.345	7.57414e-08	9.96914e-08	8.53145e-08	6.09356e-08	3.44499e-08	5.77009e-08	4.39185e-08	8.9417e-08	3.87469e-08
70	0.35	5.87178e-08	4.86172e-08	4.55005e-08	5.8727e-08	3.59295e-08	4.81709e-08	4.62994e-08	4.92166e-08	5.8967e-08		70	0.35	7.64823e-08	1.00671e-07	8.6112e-08	6.15035e-08	3.48036e-08	5.85346e-08	4.43223e-08	9.04019e-08	3.92004e-08
71	0.355	5.90485e-08	4.90992e-08	4.58995e-08	5.92801e-08	3.62739e-08	4.86096e-08	4.67074e-08	4.97431e-08	5.94168e-08		71	0.355	7.71479e-08	1.0171e-07	8.70023e-08	6.20585e-08	3.51217e-08	5.90183e-08	4.47819e-08	9.1124e-08	3.96363e-08
72	0.36	5.94465e-08	4.95262e-08	4.63403e-08	5.98372e-08	3.66239e-08	4.90125e-08	4.72219e-08	5.01238e-08	5.98515e-08		72	0.36	7.77705e-08	1.02615e-07	8.76922e-08	6.26493e-08	3.55793e-08	5.96765e-08	4.52004e-08	9.19296e-08	3.99816e-08
73	0.365	5.98708e-08	4.99182e-08	4.67825e-08	6.03607e-08	3.69582e-08	4.94294e-08	4.75754e-08	5.05469e-08	6.03206e-08		73	0.365	7.84871e-08	1.03318e-07	8.84825e-08	6.32712e-08	3.59075e-08	6.01138e-08	4.56465e-08	9.25152e-08	4.03437e-08
74	0.37	6.0247e-08	5.04371e-08	4.72072e-08	6.08776e-08	3.72941e-08	4.99174e-08	4.81239e-08	5.104e-08	6.08203e-08		74	0.37	7.929e-08	1.04245e-07	8.93001e-08	6.38492e-08	3.62285e-08	6.07752e-08	4.60529e-08	9.34932e-08	4.07325e-08
75	0.375	6.04668e-08	5.0837e-08	4.76617e-08	6.14417e-08	3.76313e-08	5.03495e-08	4.84926e-08	5.14508e-08	6.1366e-08		75	0.375	8.0162e-08	1.04993e-07	9.00707e-08	6.44388e-08	3.65282e-08	6.13844e-08	4.6665e-08	9.45394e-08	4.10882e-08
76	0.38	6.08193e-08	5.12434e-08	4.8075e-08	6.1991e-08	3.79733e-08	5.07419e-08	4.90812e-08	5.18388e-08	6.18076e-08		76	0.38	8.082e-08	1.05839e-07	9.08946e-08	6.49845e-08	3.68806e-08	6.21717e-08	4.69562e-08	9.53569e-08	4.14612e-08
77	0.385	6.12628e-08	5.17006e-08	4.85619e-08	6.25524e-08	3.83215e-08	5.11219e-08	4.94167e-08	5.22851e-08	6.22773e-08		77	0.385	8.14735e-08	1.06863e-07	9.17027e-08	6.55807e-08	3.72264e-08	6.26897e-08	4.75245e-08	9.60544e-08	4.17937e-08
78	0.39	6.18079e-08	5.20565e-08	4.89873e-08	6.31332e-08	3.86521e-08	5.15746e-08	4.99579e-08	5.27037e-08	6.26965e-08		78	0.39	8.22414e-08	1.0793e-07	9.2419e-08	6.61303e-08	3.75881e-08	6.34642e-08	4.79255e-08	9.68233e-08	4.22072e-08
79	0.395	6.21361e-08	5.24735e-08	4.94093e-08	6.3663e-08	3.90175e-08	5.19685e-08	5.05341e-08	5.31333e-08	6.31581e-08		79	0.395	8.30041e-08	1.08879e-07	9.31523e-08	6.66454e-08	3.78712e-08	6.39856e-08	4.83034e-08	9.76752e-08	4.25379e-08
80	0.4	6.27237e-08	5.28509e-08	4.97956e-08	6.42278e-08	3.93735e-08	5.2391e-08	5.09687e-08	5.34709e-08	6.36533e-08		80	0.4	8.36536e-08	1.09628e-07	9.39428e-08	6.72098e-08	3.82266e-08	6.46734e-08	4.86731e-08	9.84775e-08	4.28749e-08
